# Supplementary material
Source: PubMed Central journal article supplement (PMC4056831)
Supplement: ml2002746_si_002.pdf [file ml2002746_si_002.pdf]

# Supporting Information

## Inhibitors for Bacterial Cell Wall Recycling

*Takao Yamaguchi, Blas Blázquez, Dusan Heseck, Mijoon Lee, Leticia I. Llarrull, Bill Boggess, Allen G. Oliver, Jed F. Fisher and Shahriar Mobashery\**

Department of Chemistry and Biochemistry, University of Notre Dame, Notre Dame, IN 46556, United States

### Contents

|                                                                                                                                           |     |
|-------------------------------------------------------------------------------------------------------------------------------------------|-----|
| Experimental Procedures .....                                                                                                             | S2  |
| Figure S1. SDS-PAGE analysis of the purified NagZ .....                                                                                   | S3  |
| Figure S2. SDS-PAGE analysis of the purified MltB .....                                                                                   | S3  |
| Figure S3. MALDI mass spectra of the purified NagZ and MltB .....                                                                         | S4  |
| Figure S4. Inhibition kinetics of NagZ by compounds <b>3</b> , <b>4</b> , <b>5</b> and <b>6</b> .....                                     | S5  |
| Figure S5. Kinetics of Substrate Turnover by NagZ .....                                                                                   | S6  |
| Figure S6. The NagZ reaction with compound <b>1</b> .....                                                                                 | S6  |
| Figure S7. ESL-LC-MS analysis of the NagZ reaction products and<br>comparison to authentic synthetic samples .....                        | S7  |
| Figure S8. ESL-LC-MS analysis of the NagZ reaction products and<br>comparison to authentic synthetic samples .....                        | S8  |
| Table S1. Parameters obtained from the fit of the change of MltB<br>intrinsic fluorescence upon titration with compounds <b>3-6</b> ..... | S9  |
| Figure S9. Fluorescence spectra of MltB titrated with<br>Compounds <b>3-6</b> .....                                                       | S10 |
| Synthetic Procedures .....                                                                                                                | S11 |
| Figure S10. The ORTEP diagram of compound <b>15</b> , shown at<br>30% probability level .....                                             | S16 |
| Copies of 1D, 2D NMR, and IR Spectra .....                                                                                                | S23 |

## General Information

All organic reagents were purchased from either Sigma-Aldrich Chemical Company or Acros Organics, unless otherwise stated. All reactions were performed under an atmosphere of nitrogen unless noted otherwise. Reactions were monitored by thin-layer chromatography (TLC) plates that were visualized using UV light and cerium sulfate or phosphomolybdic acid staining, followed by heating. Flash chromatography was carried out with silica gel 60, 230-400 mesh (0.040-0.063 mm particle size) purchased from EM Science. IR spectra were obtained from KBr plates using a Perkin-Elmer Paragon 1000 FT-IR instrument. NMR spectra, including  $^1\text{H}$ ,  $^{13}\text{C}$ , DEPT, H-H COSY, and H-C HETCOR experiments, were recorded on a Varian UnityPlus 300 or a Varian INOVA-500 spectrometer. Proton and Carbon chemical shifts were referenced to residual solvent peaks. NMR signal assignments for synthesized compounds were made on the basis of H-H COSY, H-C HETCOR, and DEPT experiments. High-resolution mass spectra were obtained at the Department of Chemistry and Biochemistry, University of Notre Dame by FAB ionization, using a JEOL AX505HA mass spectrometer or by ESI ionization, using a BRUKER microTOF II mass spectrometer.

Crystals were examined under Infineum V8512 oil and placed on a MiTeGen mount, then transferred to the 296 K  $\text{N}_2$  stream of a Bruker SMART Apex CCD diffractometer. Unit cell parameters were determined from reflections with  $I > 10\sigma(I)$  harvested from three orthogonal sets of 30  $0.5^\circ$   $\omega$  scans. Data collection strategy was calculated using COSMO, included in the Apex2 suite of programs<sup>1</sup> to maximize coverage of reciprocal space in a minimum amount of time. Average four-fold redundancy of measurements was sought. Data were corrected for Lorentz and polarization effects, as well as for absorption. Structure solution and refinement utilized the programs of the SHELXTL software package.<sup>2</sup> Full details of the X-ray structure determinations are in the CIF files submitted as Supporting Information.

## Experimental Procedures

**Cloning of the *nagZ* gene from *Pseudomonas aeruginosa* PAO1.** Genomic DNA from *P. aeruginosa* PAO1 was used as the template for cloning. The PCR was accomplished using the following primers 5'-GATATACATATGCAAGGCTCTCTGATGCTC-3' (*NdeI* cut site underlined) and 5'-GATATAGGATCCTCAATCAATCAGTTGCGCAG-3' (*BamHI* cut site underlined). The conditions used for the PCR were as follows: 30 cycles of denaturation at 94 °C for 40 s, followed by annealing of primers for 40 s at 58 °C, and extension for 3 min at 72 °C using pfu DNA polymerase. The reaction volume was 50  $\mu\text{L}$  and contained 0.2 mM DNTPs, 0.5  $\mu\text{M}$  of each primer, 50 ng of template DNA, and 1  $\mu\text{L}$  of pfu DNA polymerase. The PCR reaction mixture was subjected to electrophoresis through a 1.5% agarose gel for 30 min at 100 V, and the product was excised and purified using a gel extraction kit (Qiagen). Double-digest reaction mixtures using both restriction endonucleases (*NdeI* and *BamHI*) were carried out on both the PCR product and pET28a vector. The reaction volumes were 50  $\mu\text{L}$  and consisted of approximately 5  $\mu\text{g}$  of DNA and 1 U of each restriction enzyme (New England Biolabs) and were allowed to proceed for 3 h at 37 °C. The reaction mixtures were then subjected to electrophoresis through a 1.5% agarose gel, and the desired DNA was gel purified, as described above. A total of 0.5  $\mu\text{L}$  of the digested plasmid DNA was then combined with 22  $\mu\text{L}$  of the digested PCR product and ligated together using T4 DNA Ligase (New England Biolabs) for 1 h at 25 °C. A 14- $\mu\text{L}$  portion of this ligation mixture were used to transform *E. coli* ultracompetent cells as described above, except plates containing 50  $\mu\text{g}/\text{mL}$  of kanamycin were used. A colony was picked and cultured, and the plasmid DNA was harvested the following day, as described above. The entire insert was sequenced to ensure accuracy.

<sup>1</sup> Apex2. Bruker-AXS: Madison, WI, 2008; Vol. 58.

<sup>2</sup> Sheldrick, G. M., *Acta Crystallogr. A*. **2008**, *64*, 112-122.

**Protein expression in *E. coli* and purification of NagZ.** DNA encoding NagZ in the pET28a expression vector was used to transform *E. coli* BL21 star (DE3) cells (Invitrogen). A colony was selected and cultured overnight in LB media containing 50 µg/mL of kanamycin. This culture was used to inoculate a 1 L culture that was grown to an OD<sub>600</sub> of ~0.8 at 37 °C. At this point, protein expression was induced using 1 mM IPTG (isopropyl-β-D-1-thiogalactopyranoside, Fisher Scientific) for 2.5 h at 25 °C. Postinduction cells were harvested by centrifugation (Eppendorf 5810R) for 20 min at 3200 g and resuspended in 20 mL of nickel-column binding buffer (50 mM Na<sub>2</sub>HPO<sub>4</sub>, 0.5 M NaCl, 5 mM imidazole; pH 7.4). To the resuspended cells was added 1 mM PMSF and the cells were lysed by sonification. The cell debris was removed by centrifugation at 18500 g for 75 min, and the supernatant was loaded onto a 5 mL HisTrap FF column (GE Healthcare). The column was washed with 100 mL of washing buffer (50 mM Na<sub>2</sub>HPO<sub>4</sub>, 0.5 M NaCl, 60 mM imidazole; pH 7.4) and the protein was eluted with 30 mL of elution buffer (50 mM Na<sub>2</sub>HPO<sub>4</sub>, 0.5 M NaCl, 250 mM imidazole; pH 7.4). The purified enzyme was subsequently dialyzed overnight against PBS buffer (pH 7.4) containing 10% (w/v) glycerol, the enzyme was stored at 4 °C. The protein content from the column fractions was monitored by SDS-PAGE (Figure S1). The NagZ concentration was determined by measuring the absorbance of the solution at 280 nm and using a calculated extinction coefficient of 32 220 M<sup>-1</sup>cm<sup>-1</sup>.<sup>3</sup> Matrix-assisted laser desorption ionization (MALDI) mass spectrometric analysis revealed a molecular mass of 38 171 Da for NagZ, in agreement with the value deduced from the gene sequence (38 263 Da) (Figure S3A). The molecular mass of 37 594 Da for the NagZ from *E. coli* was not observed in the preparation.

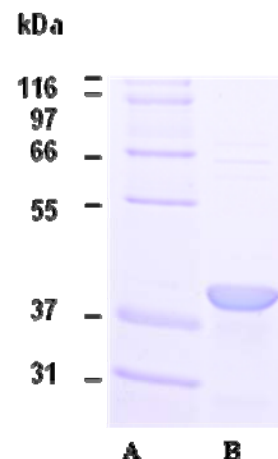

**Figure S1.** 12% SDS-PAGE analysis of the purified NagZ. (A) Mark12™ Molecular Weight Marker; (B) NagZ (5 µg) after dialysis.

**Expression and purification of MltB.** The gene encoding the lytic transglycosylase MltB (amino acids 21–361) was amplified from *Escherichia coli* K12 substrain MG1655 chromosome using high-fidelity *Pfu*Ultra II Fusion HS DNA Polymerase (Stratagene®) and the following oligonucleotide primers: mltB\_fw\_NdeI, 5'-AGATATACATATGAAGCCAAAACCTACTG-3', and mltB\_rv\_XhoI, 5'- ATCTCGAGCTGTACTCGCGCCAG-3'. The PCR product was cloned into pET-24a(+) vector from Novagene, to give a gene that codes for MltB (amino acids 21-361, S21M) with a C-terminal His6x tag preceded by two additional amino acids (LE). The protein (349 amino acids, 39,041 Da) was expressed in *E. coli* BL21 (DE3). Cells containing the plasmid were selected on agar supplemented with 50 µg/mL kanamycin. The transformants were inoculated overnight in 5 mL of Luria-Bertaini (LB) medium with 50 µg/mL kanamycin. This culture was used to inoculate 500 mL of LB medium supplemented with 50 µg/mL kanamycin in a 3-L Erlenmeyer flask, which was grown at 37 °C, 120 rpm. Protein expression was induced at an OD<sub>600</sub> of 0.8, with 0.4 mM IPTG and incubation was continued at 15 °C for 12 h to minimize formation of inclusion bodies. Cells were harvested by centrifugation for 30 min at 3220 g, 4 °C, and the cell pellet was resuspended in 10 mL of 20 mM HEPES buffer, pH 7.0, supplemented with 0.5 M NaCl, 10% glycerol, 25 mM imidazole and 0.1% Brij-35. The protein was released from the cells by sonification on ice (10 cycles of 2 min sonification each, with 1 min rest in between sonification cycles, using a Branson 450 Sonifier). The cell extract was then centrifuged for 45 min at 18514 g at 4 °C. The supernatant was loaded onto a 5-mL HiTrap Chelating HP column (GE Healthcare). The

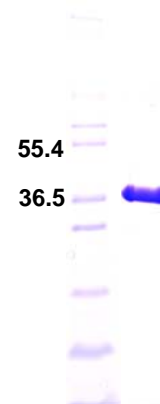

**Figure S2.** 12% SDS-PAGE gel showing purified MltB. Lane 1: Mark12™ Molecular Weight Marker; lane 2: MltB (10 µg) after dialysis.

<sup>3</sup> Génèreux, C.; Dehareng, D.; Devreese, B.; Van Beeumen, J.; Frère, J. M.; Joris, B., *Biochem. J.* **2004**, *377*, 111-120.

column was washed with 10 mL of 20 mM HEPES buffer, pH 7.0, 0.5 M NaCl, 10% glycerol, 25 mM imidazole and 0.1% Brij-35. Elution was performed using a gradient from 0-100% of 20 mM HEPES buffer, pH 7.0, 0.5 M NaCl, 10% glycerol, 500 mM imidazole and 0.1% Brij-35. After dialysis against 50 mM HEPES buffer, pH 7.6, 0.20 M NaCl, and Brij-35, the protein concentration was determined from the absorbance at 280 nm, using the theoretical extinction coefficient at 280 nm ( $67\,840\text{ M}^{-1}\text{ cm}^{-1}$ ). The protein content from the column fractions was monitored by SDS-PAGE (Figure S2). MALDI mass spectrometric analysis revealed a molecular mass of 39 263 Da for MltB, in agreement with the value deduced from the gene sequence (39 041 Da) (Figure S3B).

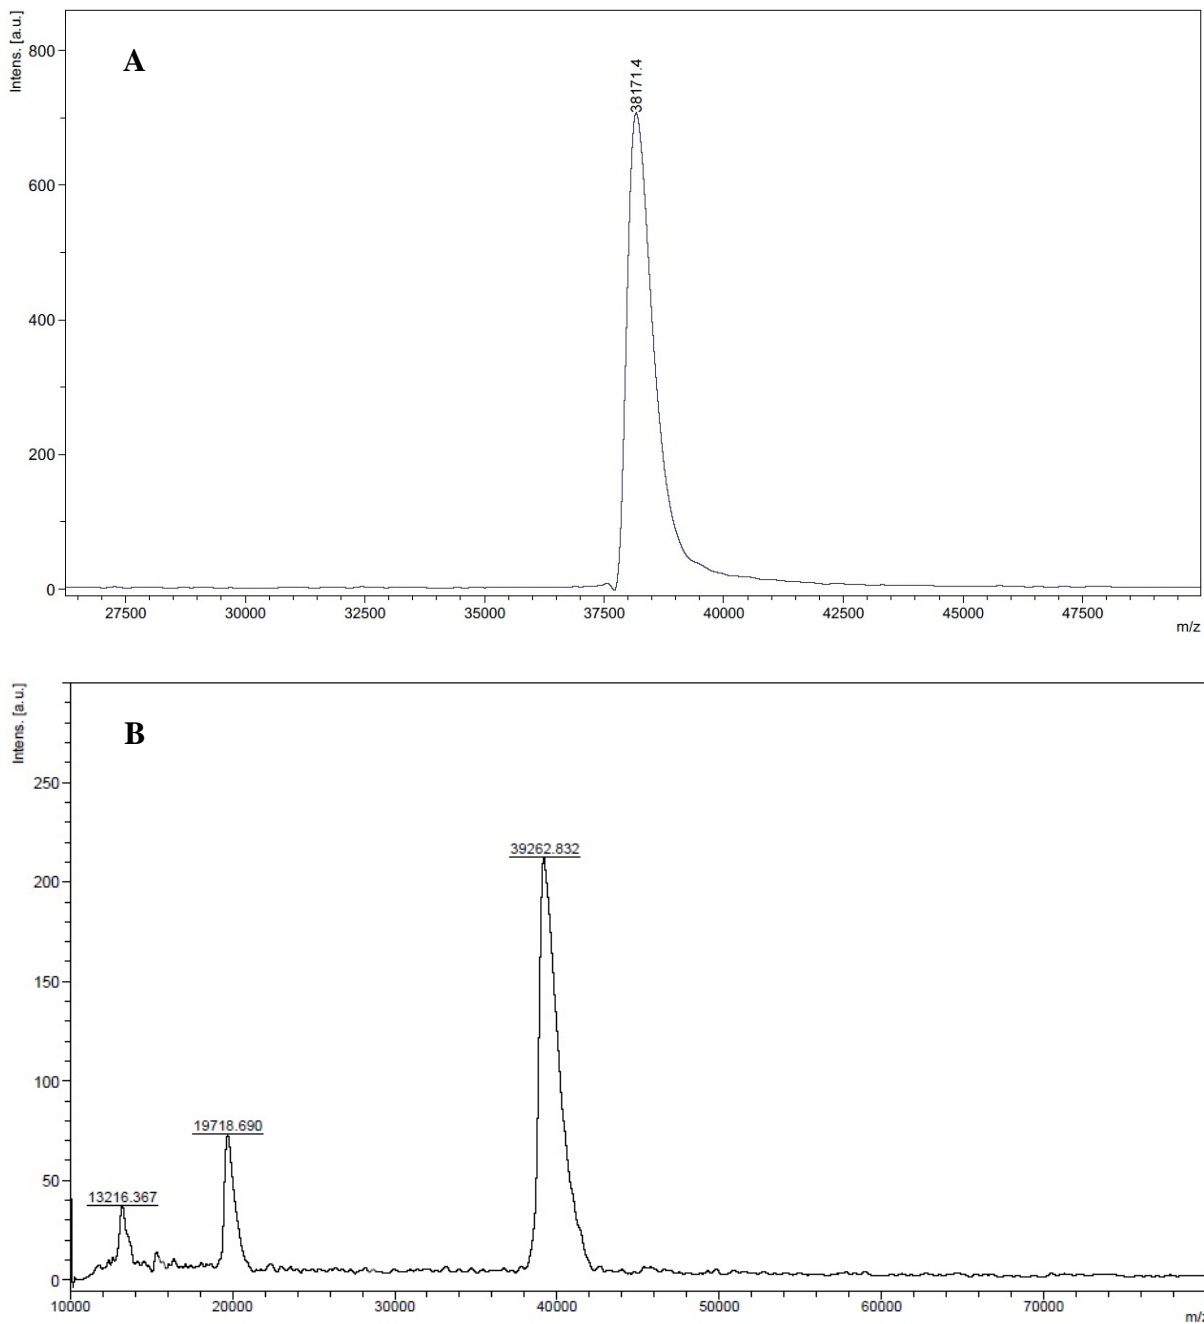

**Figure S3.** MALDI mass spectra of the purified NagZ (A) and of the purified MltB (B).

**NagZ Inhibition Kinetics.** Experiments to assess inhibition of NagZ by **3**, **4**, **5** and **6** were performed using 4-nitrophenyl 2-acetamido-2-deoxy- $\beta$ -D-glucopyranoside (PNP-GlcNAc) as substrate, which was purchased from Sigma. Enzyme activity was measured by spectrophotometric monitoring of the release of 4-nitrophenolate ion at 400 nm. Standard reaction of NagZ (500  $\mu$ L) was performed in PBS buffer pH 7.4 contained 40 nM enzyme and 0.1-1 mM substrate (Figure S4). The assays were performed in triplicate at 25  $^{\circ}$ C for 4 min.

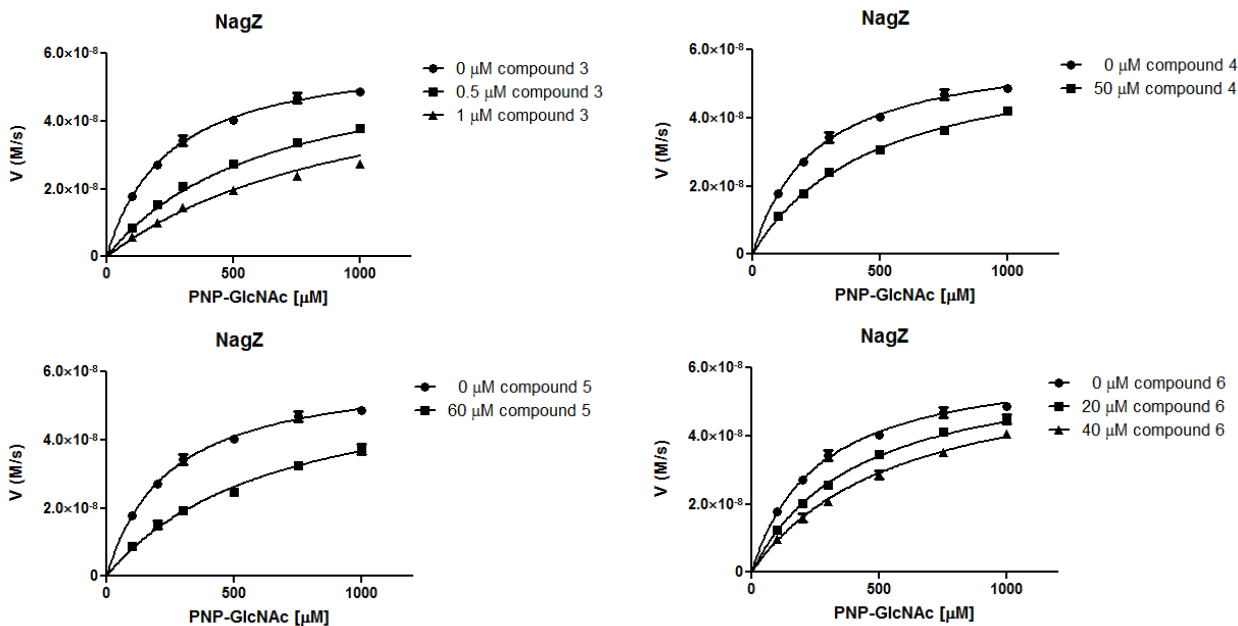

**Figure S4.** Inhibition kinetics of NagZ by compounds **3**, **4**, **5** and **6**.

**Kinetics of Substrate Turnover by NagZ.** The kinetics studies of NagZ and GlcNAc-anhMurNAc-pentapeptide (**1**) were performed by HPLC (Figure S5). The assays were carried out in PBS buffer (pH 7.4) at 25  $^{\circ}$ C with substrate concentrations ranging from 0.15 mM to 0.9 mM and 40 nM enzyme concentration. The reaction mixtures were incubated at 25  $^{\circ}$ C for 35 min. The reactions were stopped by the addition of two volumes of 0.075% TFA in water. The internal standard was  $N\alpha,N\epsilon$ -Diacetyl-L-Lys-D-Ala-D-Ala. Reaction products were separated and quantified on a C18 reversed-phase HPLC column (Sunfire C18, 3.5  $\mu$ m, 4.6  $\times$  150 mm; Waters) on a PerkinElmer series 200 System. The column was equilibrated with 0.05% trifluoroacetic acid in water and compounds were eluted with a linear acetonitrile gradient from 0 to 15% over 40 min with a flow rate of 1 mL/min. The column effluent was monitored at 205 nm. The catalytic activity of NagZ was quantified from the rate of product appearance. The kinetics studies of NagZ and GlcNAc-MurNAc-pentapeptide (**20**) were performed by HPLC using the same protocol (Figure S5). The  $t_R$  for **1** was 32 min, for **2** was 31 min, for **20** was 30.5 min and for **22** was 27 min. HPLC chromatograms of the NagZ reaction of **1** are shown in Figure S6 as a representative example.

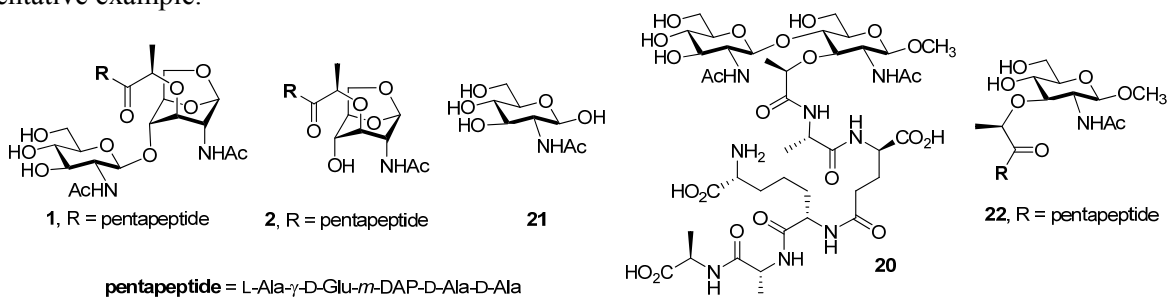

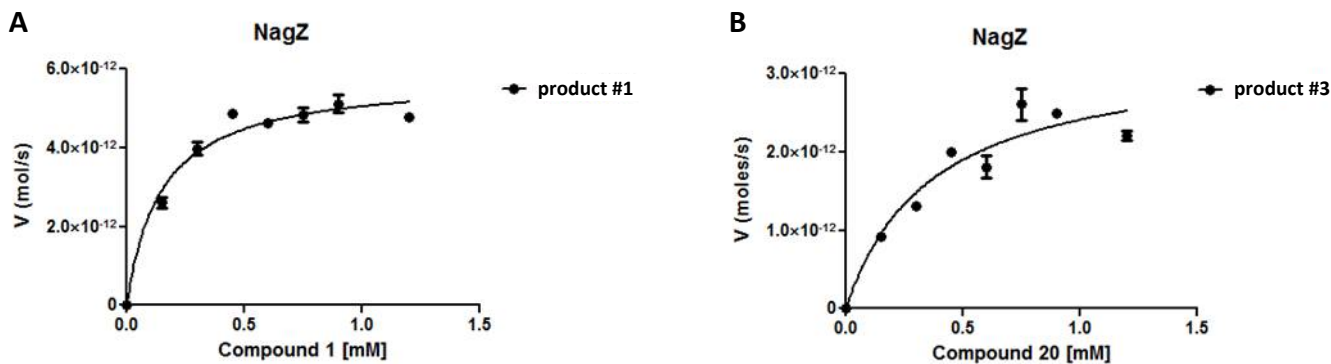

**Figure S5.** Kinetics studies of NagZ with GlcNAc-anhMurNAc-pentapeptide (**1**, **A**) and GlcNAc-MurNAc-pentapeptide (**20**, **B**)

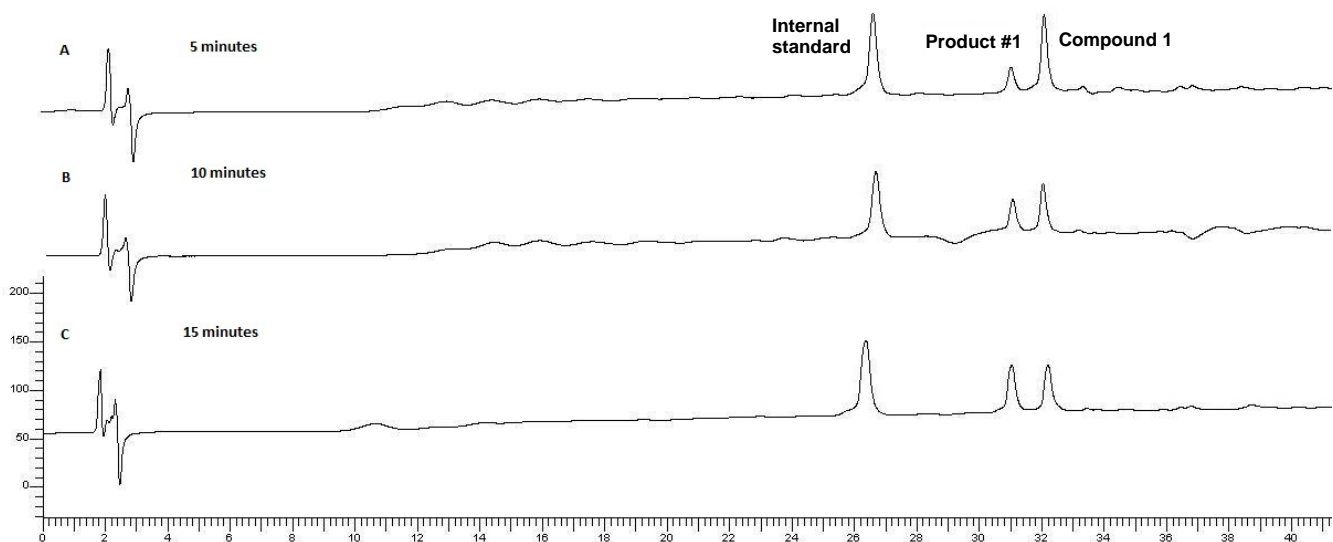

**Figure S6.** The NagZ reaction with compound **1**. The time course for conversion of compound **1** (retention time at 32 min) by NagZ to the product #1 (anhMurNAc pentapeptide, retention times at 31 min) were monitored at 5 min (**A**), 10 min (**B**), and 15 min (**C**) of incubation. The identity of product #1 was confirmed by LC/MS analysis. The second product #2 (GlcNAc) of NagZ reaction is not detectable at 205 nm.

The  $K_i$ ,  $k_{cat}$  and  $K_m$  values were determined using a nonlinear regression with GraphPad Prism version 5.03 for Windows, GraphPad Software, San Diego California USA, [www.graphpad.com](http://www.graphpad.com).

**ESI-MS.** Characterization of the reaction products was performed using a Dionex Ultimate 3000 RSLC and Bruker MicrOTOF-QII electrospray ionization (ESI) mass spectrometer (Figure S7). The peaks were initially analyzed using positive ionization mode throughout the  $m/z$  of 100 – 1200. The charge states of the major ions were determined as the reciprocal of the spacing between two adjacent isotopic peaks differing in mass by 1 Da.<sup>4</sup> Analysis of the MS data and fragmentation pattern of the reaction products and of authentic compounds **2**, **21**, and **22** allowed us to confirm chemical structure of the reaction products (Figures S7 and S8).

<sup>4</sup> Henry, K. D.; McLafferty, F. W. *Org. Mass Spectrom.* **1990**, *25*, 490-492.

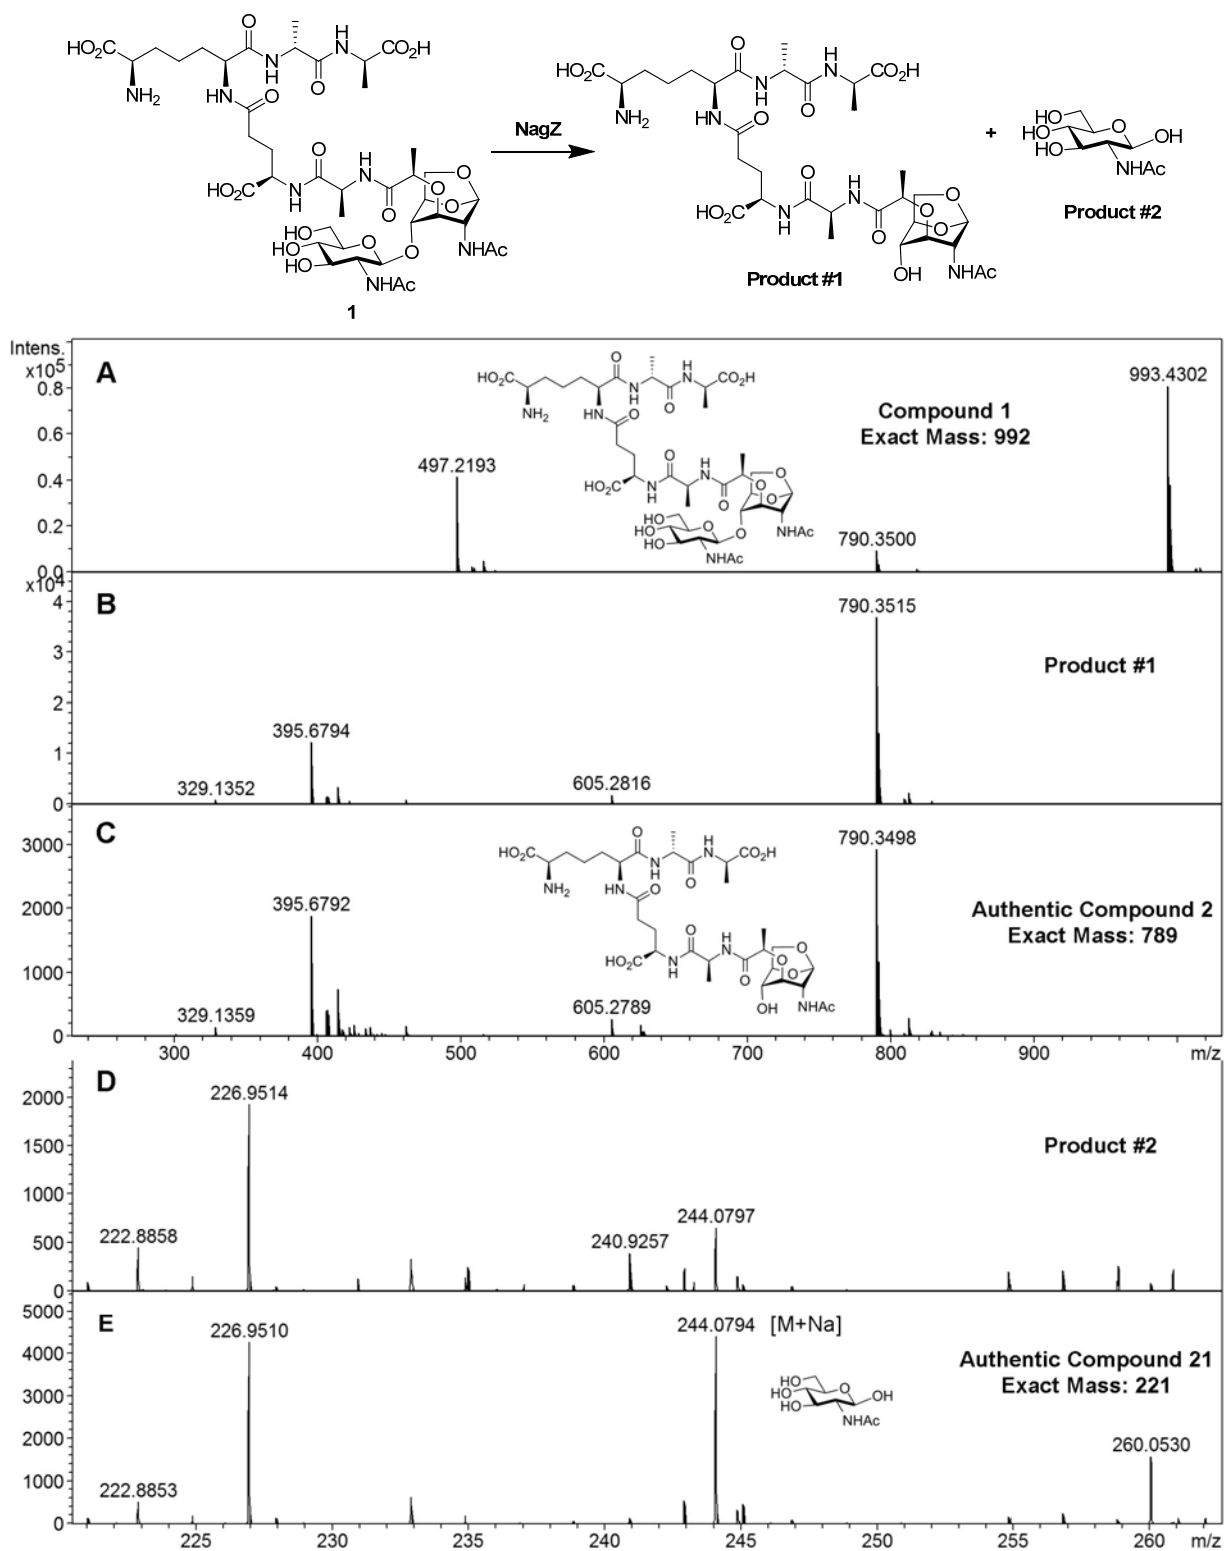

**Figure S7.** ESI-LC-MS analysis of the NagZ reaction products and comparison to authentic synthetic samples. The following spectra are shown: synthetic compound **1** (A); reaction product #1 (B); authentic compound **2** (C); reaction product #2 (D); and authentic compound **21** (E).

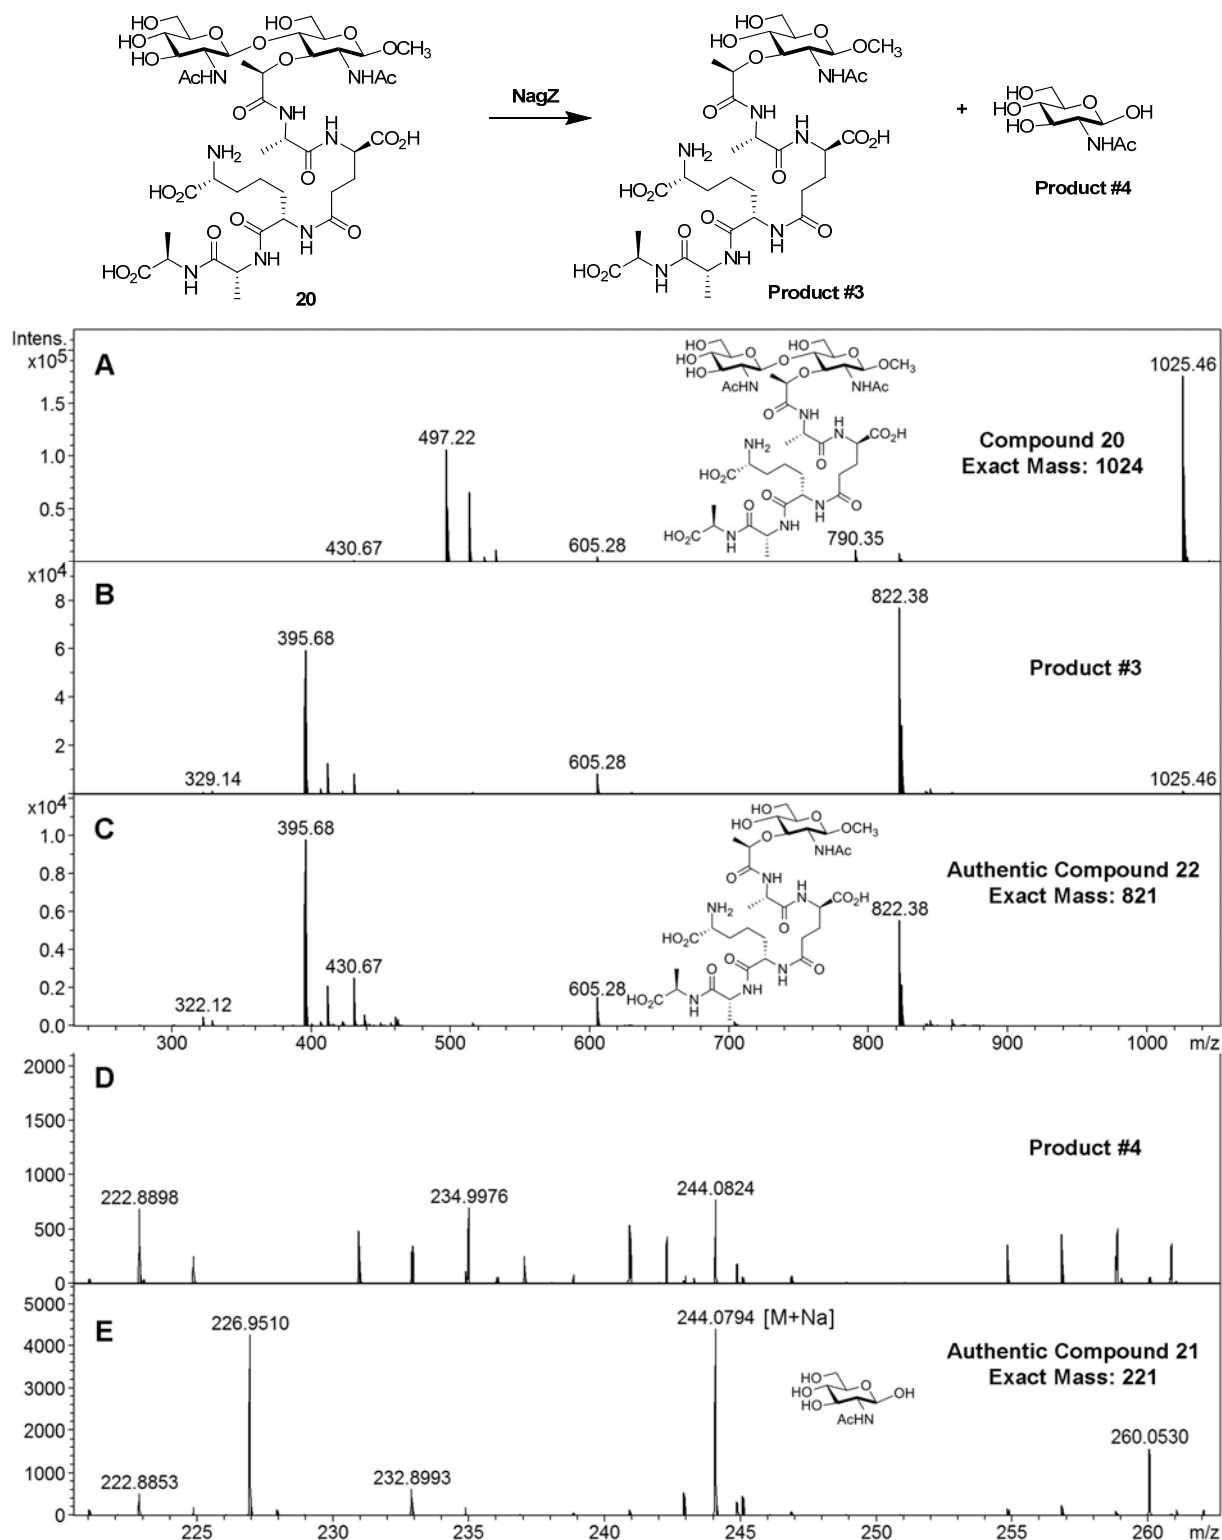

**Figure S8.** ESI-LC-MS analysis of the NagZ reaction products and comparison to authentic synthetic samples. The following spectra are shown: synthetic compound **20** (A); reaction product **#3** (B); authentic compound **22** (C); reaction product **#4** (D); and authentic compound **21** (E).



**Evaluation of binding of compounds 3-6 to MltB.** To evaluate binding of compounds **3-6** to MltB, we followed the extinction of the intrinsic fluorescence of MltB upon titration with increasing concentration of each compound. A total of 2 mL of a 0.25  $\mu\text{M}$  solution of MltB in 50 mM HEPES buffer, pH 7.6, 0.20 M NaCl, and Brij-35 was titrated upon addition of aliquots of a 42 mM stock solution of compounds **3-6** in water. After each addition, the mixture was allowed to equilibrate at 25  $^{\circ}\text{C}$  with stirring (using a  $7 \times 2$  mm stir bar) in a 3 mL fluorescence cell. The fluorescence spectra of the protein or protein-compound mixture were recorded with a Varian Cary Eclipse Fluorescence Spectrophotometer (Varian;  $\lambda_{\text{exc}} = 280$  nm,  $\lambda_{\text{em}} = 290\text{-}450$  nm, Excitation slit = 10 nm, Emission slit = 5 nm, PMT-V = 600 V). The MltB fluorescence emission spectrum presented a maximum at 334.06 nm (Figure S9). Upon titration of MltB with compounds **3-6** there was a decrease in the emission intensity at 334.06 nm, and a slight shift in the maximum of emission to a lower wavelength (Figure S9). Before fitting the binding data, the fluorescence intensity at 334.06 nm was corrected for dilution. For compounds **3** and **4**, the change in fluorescence intensity with increasing compound concentration was fit using equation S1 for a one-site saturation plus non-specific binding model (Figure S9.A-D; Table S1). For compounds **5** and **6**, the change in fluorescence intensity with increasing compound concentration was fit using equation S2 for a one-site saturation binding model (Figure S9.E-H; Table S1).

$$\Delta If = \frac{\Delta If_{\text{max}} \cdot x}{K_d + x} + k_{\text{ns}} \cdot x \quad (\text{Equation S1})$$

$$\Delta If = \frac{\Delta If_{\text{max}} \cdot x}{K_d + x} \quad (\text{Equation S2})$$

**Table S1.** Parameters obtained from the fit of the change of MltB intrinsic fluorescence upon titration with compounds **3-6** (Figure S7) using equation S1 (compounds **3** and **4**) or equation S2 (compounds **5** and **6**).

| Compound          | $K_d$ ( $\mu\text{M}$ ) | $k_{\text{ns}}$ ( $\mu\text{M}^{-1}$ ) |
|-------------------|-------------------------|----------------------------------------|
| Compound <b>3</b> | $174 \pm 9$             | $0.128 \pm 0.004$                      |
| Compound <b>4</b> | $1000 \pm 200$          | $0.060 \pm 0.006$                      |
| Compound <b>5</b> | $189 \pm 8$             | -                                      |
| Compound <b>6</b> | $1010 \pm 20$           | -                                      |

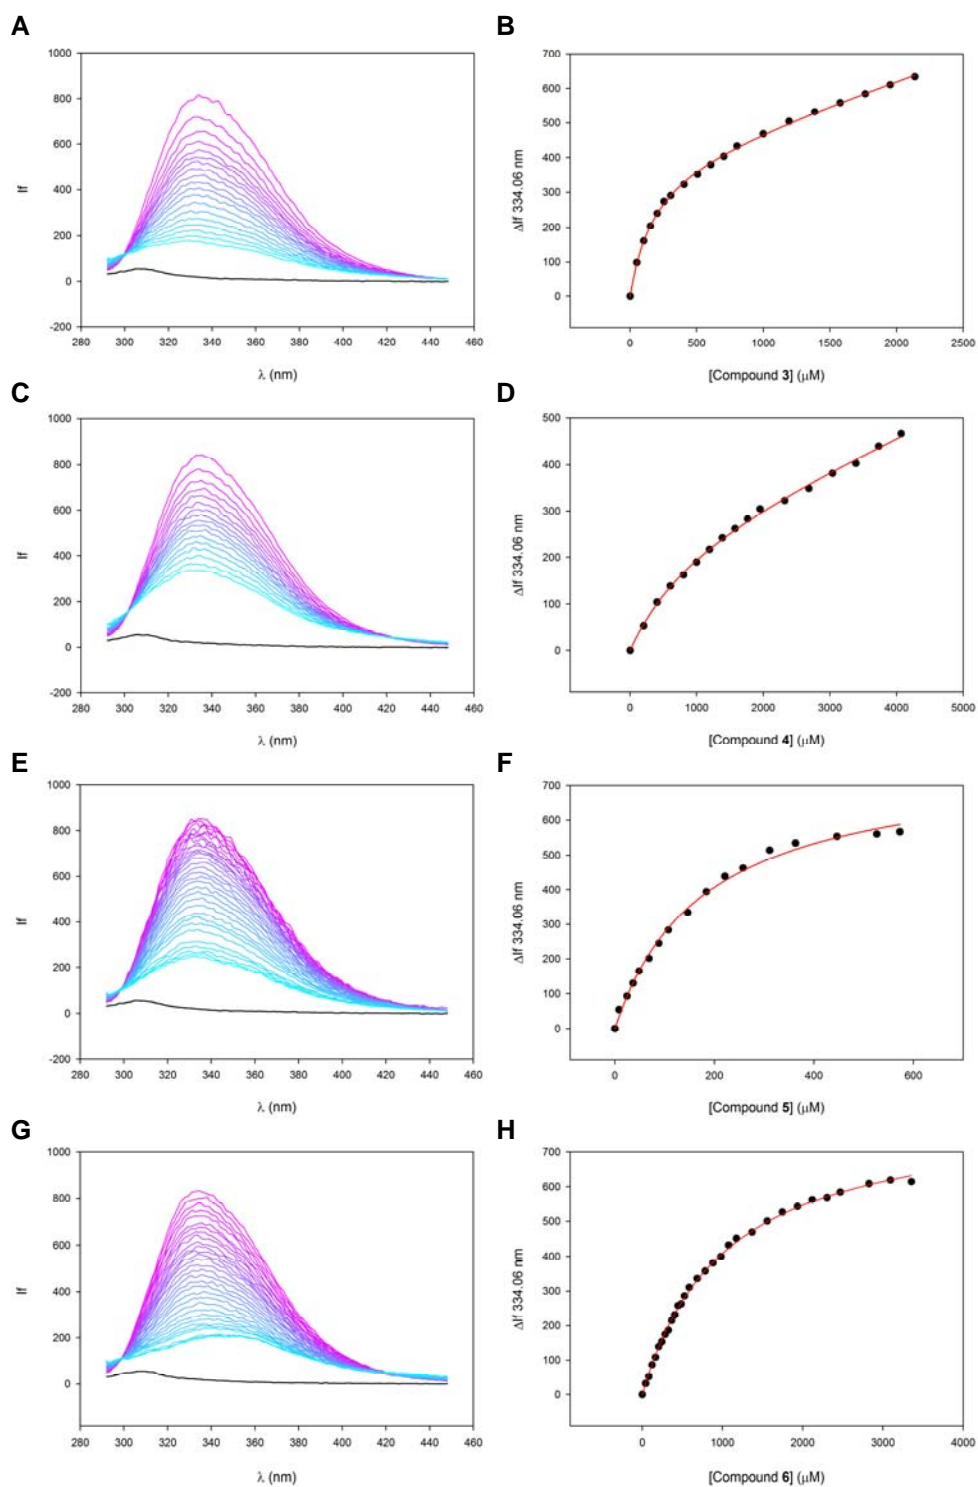

**Figure S9.** Left panels: fluorescence spectra of MltB titrated with increasing concentration of compounds **3-6** (pink: MltB in buffer, pink to cyan: MltB with increasing concentrations of the corresponding compound; black: buffer) **A.** Compound **3.** **C.** Compound **4.** **E.** Compound **5.** **G.** Compound **6.** Right panels: change in the intensity of fluorescence at 334.06 nm with increasing concentration of compounds **3-6**, where  $\Delta I_f = - (I_{f\text{final}} - I_{f\text{initial}})$ . **B.** Compound **3.** **D.** Compound **4.** **F.** Compound **5.** **H.** Compound **6.** In each case, the red line shows the best fit (to equation S1 for compounds **3** and **4** and to equation S2 for compounds **5** and **6**).

## Synthetic Procedures

Compounds **1**, **2**, **20**, and **21** were prepared according to the literature methods developed by our laboratory.<sup>5</sup>

### Benzyl 2-acetamido-4,6-*O*-benzylidene-2-deoxy- $\alpha$ -D-glucopyranoside (**9**)

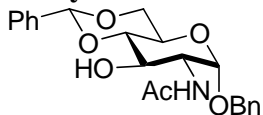

The compound **9** was prepared from D-(+)-glucosamine by a variation of the known procedures.<sup>6</sup> Sodium methoxide (32.6 g, 0.60 mol) was added to a suspension of D-(+)-glucosamine hydrochloride (100 g, 0.46 mol) in MeOH (1 L), and the mixture was stirred for 30 min at 40 °C. After addition of acetic anhydride (79 mL, 0.83 mol), the resulting suspension was stirred vigorously for 22 h at 40 °C, and then cooled to 0 °C. After filtration of the reaction mixture, the filtered white solid was washed with cold MeOH and dried to afford *N*-acetyl D-glucosamine (100 g, 97%) as a white powder.

Acetyl chloride (27.4 mL, 0.39 mol) was slowly added to a suspension of *N*-acetyl D-glucosamine (85 g, 0.39 mol) in anhydrous benzyl alcohol (300 mL) under a nitrogen atmosphere. The suspension was stirred at room temperature for 2 h, heated to 50 °C for 4 h, and then cooled to room temperature. The resulting yellow solution was slowly poured into Et<sub>2</sub>O (3 L) in ice-water bath, and the mixture was vigorously stirred for 2 h at 0 °C. The precipitate was recovered by filtration and dried under vacuum to afford benzyl 2-acetamido-2-deoxy- $\alpha$ -D-glucopyranoside (113 g, 94%) as a white solid.

Benzaldehyde dimethylacetal (58 mL, 0.39 mol) and *p*-toluenesulfonic acid monohydrate (1.8 g, 9.6 mmol) were added to a solution of benzyl 2-acetamido-2-deoxy- $\alpha$ -D-glucopyranoside (60 g, 0.19 mol) in anhydrous DMF (500 mL), and the mixture was stirred at 70 °C for 24 h. The resulting mixture was cooled to 0 °C and then triethylamine (8.1 mL, 56 mmol) was added. After stirring for 30 min at room temperature, the solvent and extra reagent were removed under reduced pressure to give a white solid. MeOH was added to the solid and the resulting suspension was stirred vigorously for 5 min. After filtration, the filtered white solid was washed well with MeOH and dried under vacuum to afford **2** (67.7 g, 88%) as a white powder. **2**: <sup>1</sup>H NMR (500 MHz, DMSO-*d*<sub>6</sub>)  $\delta$  1.85 (s, 3H), 3.51 (dd, *J* = 8.5, 8.5 Hz, 1H, H-4), 3.63–3.80 (m, 3H, H-3, H-5, H-6a), 3.85 (ddd, *J* = 3.6, 8.2, 8.4 Hz, 1H, H-2), 4.14 (dd, *J* = 2.8, 8.6 Hz, 1H, H-6b), 4.48 and 4.70 (AB, *J* = 12.7 Hz, 2H, OCH<sub>2</sub>Ph), 4.82 (d, *J* = 2.4 Hz, 1H, H-1), 5.19 (d, *J* = 5.8 Hz, 1H, OH), 5.61 (s, 1H, CHPh), 7.26–7.49 (m, 10H), 8.00 (d, *J* = 8.0 Hz, 1H, NH); <sup>13</sup>C NMR (126 MHz, DMSO-*d*<sub>6</sub>)  $\delta$  22.5, 54.2, 62.8, 67.2, 68.5, 82.1, 96.9, 100.9, 126.4, 127.6, 127.6, 128.0, 128.3, 137.7, 137.7, 169.4; IR 3399, 3302, 1651, 1552, 1452, 1374, 1129, 1087, 1059 cm<sup>-1</sup>; HRMS (FAB) calcd for C<sub>22</sub>H<sub>25</sub>NO<sub>6</sub> (M + H<sup>+</sup>) 400.1760, found 400.1763.

<sup>5</sup> (a) Heseck, D.; Lee, M.; Zhang, W.; Noll, B. C.; Mobashery, S. *J. Am. Chem. Soc.* **2009**, *131*, 5187-5193. (b) Lee, M.; Zhang, W.; Heseck, D.; Noll, B. C.; Boggess, B.; Mobashery, S. *J. Am. Chem. Soc.* **2009**, *131*, 8742-8743. (c) Lee, M.; Heseck, D.; Shah, I. M.; Oliver, A. G.; Dworkin, J.; Mobashery, M. *ChemBioChem* **2010**, *11*, 2525-2529.

<sup>6</sup> (a) Berger, I.; Nazarov, A. A.; Hartinger, C. G.; Groessler, M.; Valiahdi, S.-M.; Jakupec, M. A.; Keppler, B. K. *ChemMedChem* **2007**, *2*, 505–514. (b) Babic, A.; Pecar, S. *Tetrahedron: Asymmetry* **2008**, *19*, 2265–2271.

**Benzyl 2-acetamido-4,6-*O*-benzylidene-3-*O*-*tert*-butyldimethylsilyl-2-deoxy- $\alpha$ -D-glucopyranoside (10)**

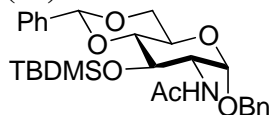

Imidazole (22.2 g, 0.33 mol) and *t*-butyldimethylsilyl chloride (25.8 g, 0.17 mol) were added to a solution of **9** (65 g, 0.16 mol) in anhydrous DMF (400 mL), and the reaction mixture was stirred at room temperature for 30 min and then 70 °C for 2.5 h under nitrogen atmosphere. After the mixture was cooled to room temperature, saturated NaHCO<sub>3</sub> (30 mL) was added. The mixture was concentrated to dryness, and the residue was dissolved in Et<sub>2</sub>O then washed with water and brine. After drying over Na<sub>2</sub>SO<sub>4</sub>, the organic layer was concentrated under reduced pressure, and the crude product was purified by silica gel column chromatography (AcOEt/hexane, 1:3 to 1:1) to afford the product **10** (83.6 g, quant.) as a white solid. <sup>1</sup>H NMR (500 MHz, CDCl<sub>3</sub>)  $\delta$  -0.03 (s, 3H), 0.03 (s, 3H), 0.83 (s, 9H), 1.96 (s, 3H), 3.56 (dd, *J* = 9.2, 9.2 Hz, 1H, H-4), 3.76 (dd, *J* = 10.3, 10.3 Hz, 1H, H-6a), 3.89 (ddd, *J* = 4.8, 10.0, 10.0 Hz, 1H, H-5), 3.90 (dd, *J* = 9.0, 9.8 Hz, 1H, H-3), 4.24 (dd, *J* = 4.8, 10.2 Hz, 1H, H-6b), 4.31 (ddd, *J* = 3.8, 9.9, 9.9 Hz, 1H, H-2), 4.49 and 4.73 (AB, *J* = 11.8 Hz, 2H, CH<sub>2</sub>Ph), 4.89 (d, *J* = 3.8 Hz, 1H, H-1), 5.53 (s, 1H, CHPh), 5.61 (d, *J* = 9.8 Hz, 1H, NH), 7.33–7.53 (m, 10H); <sup>13</sup>C NMR (126 MHz, CDCl<sub>3</sub>)  $\delta$  -4.8, -3.9, 18.2, 23.6, 25.8, 54.1 (C-2), 63.2 (C-5), 69.1 (C-6), 70.1 (CH<sub>2</sub>Ph), 70.8 (C-3), 82.7 (C-4), 97.9 (C-1), 102.0 (CHPh), 126.4, 128.3, 128.4, 128.4, 128.8, 129.2, 137.1, 137.4, 169.8; HRMS (FAB) calcd for C<sub>28</sub>H<sub>40</sub>NO<sub>6</sub>Si (M + H<sup>+</sup>) 574.2625, found 574.2615.

**2-Acetamido-4,6-*O*-benzylidene-3-*O*-*tert*-butyldimethylsilyl-2-deoxy- $\alpha,\beta$ -D-glucosamine (11)**

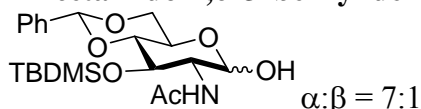

The compound **10** (40 g, 78 mmol,  $\alpha:\beta = 5:1$ ) was dissolved in THF (500 mL), and 10 wt% Pd/C (15 g) was added to the solution cautiously to avoid ignition. After stirring for 10 days under a hydrogen atmosphere at room temperature, the mixture was filtered through a layer of Celite, and the Celite pad was washed well with THF. The solution was removed under reduced pressure to afford the product **11** (33 g, quant.,  $\alpha:\beta = 7:1$ ) as a white powder. <sup>1</sup>H NMR (500 MHz, CDCl<sub>3</sub>)  $\delta$  -0.10 (s, 21/8H,  $\alpha$ ), -0.08 (s, 3/8H,  $\beta$ ), -0.04 (s, 21/8H,  $\alpha$ ), -0.01 (s, 3/8H,  $\beta$ ), 0.75 (s, 63/8H,  $\alpha$ ), 0.76 (s, 9/8H,  $\beta$ ), 1.94 (s, 21/8H,  $\alpha$ ), 1.98 (s, 3/8H,  $\beta$ ), 3.38 (ddd, *J* = 4.8, 9.6, 9.6 Hz, 1/8H, H-5,  $\beta$ ), 3.44 (dd, *J* = 9.3, 9.3 Hz, 1H, H-4), 3.66 (dd, *J* = 10.3, 10.3 Hz, 1H, H-6a,  $\alpha$  and H-2,  $\beta$ ), 3.72 (dd, *J* = 10.3, 10.3 Hz, 1/8H, H-6a,  $\beta$ ), 3.79 (dd, *J* = 9.2, 9.2 Hz, 1/8H, H-3,  $\beta$ ), 3.90 (dd, *J* = 9.4, 9.4 Hz, 7/8H, H-3,  $\alpha$ ), 3.98 (ddd, *J* = 5.0, 9.9, 9.9 Hz, 7/8H, H-5,  $\alpha$ ), 4.10 (ddd, *J* = 3.4, 9.8, 9.8 Hz, 7/8H, H-2,  $\alpha$ ), 4.16 (dd, *J* = 4.9, 10.1 Hz, 7/8H, H-6b,  $\alpha$ ), 4.26 (dd, *J* = 4.8, 10.4 Hz, 1/8H, H-6b,  $\beta$ ), 4.61 (dd, *J* = 7.9, 7.9 Hz, 1/8H, H-1,  $\beta$ ), 4.82 (d, *J* = 3.2 Hz, 7/8H, OH,  $\alpha$ ), 5.11 (dd, *J* = 3.6, 3.6 Hz, 7/8H, H-1,  $\alpha$ ), 5.42 (s, 1H, CHPh), 5.57 (d, *J* = 7.6 Hz, 1/8H, OH,  $\beta$ ), 5.84 (d, *J* = 9.6 Hz, 7/8H, NH,  $\alpha$ ), 6.16 (d, *J* = 7.2 Hz, 1/8H, NH,  $\beta$ ), 7.24–7.42 (m, 5H); <sup>13</sup>C NMR for the  $\alpha$ -isomer (The  $\beta$ -isomer was undetectable because it is the minor isomer.) (126 MHz, CDCl<sub>3</sub>)  $\delta$  -4.7, -3.9, 18.3, 23.7, 25.8, 54.9, 62.9, 69.2, 70.4, 82.8, 92.8, 102.1, 126.5, 128.3, 129.2, 137.4, 170.7; HRMS (FAB) calcd for C<sub>21</sub>H<sub>34</sub>NO<sub>6</sub>Si (M + H<sup>+</sup>) 424.2155, found 424.2137.

### 2-Acetamido-4,6-*O*-benzylidene-3-*O*-*tert*-butyldimethylsilyl-2-deoxy-D-glucono-1,5-lactone (**12**)

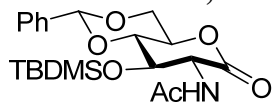

Molecular sieves 4 Å (20 g) and pyridinium chlorochromate (26.6 g, 124 mmol) were added to a solution of **11** (34.9 g, 82.4 mmol) in CH<sub>2</sub>Cl<sub>2</sub> (300 mL), and the reaction mixture was stirred for 48 h at room temperature. After filtration through a short layer of silica gel, the resulting solution was concentrated *in vacuo* to afford the crude product **12** (35 g) as a light-brown foam. The crude product was used for next reaction without further purification. However, a portion of pure product (a white powder) was prepared by silica gel column chromatography (AcOEt) for the purpose of characterization of the compound. <sup>1</sup>H NMR (500 MHz, CDCl<sub>3</sub>) δ -0.03 (s, 3H), -0.02 (s, 3H), 0.85 (s, 9H), 2.08 (s, 3H), 3.69 (dd, *J* = 7.2, 8.0 Hz, 1H, H-2), 3.73 (dd, *J* = 9.5, 9.5 Hz, 1H, H-4), 3.81 (dd, *J* = 10.0, 12.2 Hz, 1H, H-6a), 4.31 (dd, *J* = 8.0, 9.6 Hz, 1H, H-3), 4.49 (dd, *J* = 5.5, 12.5 Hz, 1H, H-6b), 4.51 (ddd, *J* = 5.4, 9.8, 9.8 Hz, 1H, H-5), 5.57 (s, 1H, CHPh), 6.48 (d, *J* = 7.0 Hz, 1H, NH), 7.36–7.50 (m, 5H); <sup>13</sup>C NMR (126 MHz, CDCl<sub>3</sub>) δ -4.7, -4.0, 18.3, 22.7, 25.9, 59.6, 68.0, 68.1, 72.3, 79.2, 102.1, 126.4, 128.4, 129.5, 136.8, 168.3, 170.9; HRMS (FAB) calcd for C<sub>21</sub>H<sub>32</sub>NO<sub>6</sub>Si (M + H<sup>+</sup>) 422.1999, found 422.1985.

### 2-Acetamido-4,6-*O*-benzylidene-3-*O*-*tert*-butyldimethylsilyl-2-deoxy-D-gluconamide (**13**)

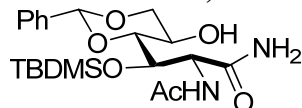

Anhydrous methanolic ammonia (7 N, 412 mL, 2.88 mol) was added to a solution of the crude **12** (35 g) in anhydrous CH<sub>2</sub>Cl<sub>2</sub> (600 mL). The reaction mixture was stirred for 3 h under a nitrogen atmosphere, followed by concentration *in vacuo*. The crude product was purified by silica gel column chromatography (AcOEt) to afford the title compound (27.8 g, 77% from **12**) as a white powder. <sup>1</sup>H NMR (500 MHz, CDCl<sub>3</sub>) δ 0.08 (s, 3H), 0.18 (s, 3H), 0.90 (s, 9H), 1.99 (s, 3H), 3.49 (brs, 1H, OH), 3.57 (dd, *J* = 10.5, 10.5 Hz, 1H, H-6a), 3.64 (dd, *J* = 4.0, 9.4 Hz, 1H, H-4), 3.86 (ddd, *J* = 5.3, 9.7, 9.7 Hz, 1H, H-5), 4.29 (dd, *J* = 5.4, 10.8 Hz, 1H, H-6b), 4.56 (dd, *J* = 3.6, 3.6 Hz, 1H, H-3), 4.69 (dd, *J* = 3.4, 6.8 Hz, 1H, H-2), 5.41 (s, 1H, CHPh), 5.63 (brs, 1H, NH<sub>2</sub>), 6.76 (brs, 1H, NH<sub>2</sub>), 6.82 (d, *J* = 6.8 Hz, 1H, NHAc), 7.33–7.46 (m, 5H); <sup>13</sup>C NMR (126 MHz, CDCl<sub>3</sub>) δ -4.6, 18.4, 23.4, 26.1, 55.3 (C-2), 62.4 (C-5), 71.1 (C-3), 71.5 (C-6), 82.0 (C-4), 101.7 (CHPh), 126.5, 128.4, 129.3, 137.7, 171.3, 172.9; HRMS (FAB) calcd for C<sub>21</sub>H<sub>35</sub>N<sub>2</sub>O<sub>6</sub>Si (M + H<sup>+</sup>) 439.2264, found 439.2251.

### 2-Acetamido-5-amino-4,6-*O*-benzylidene-3-*O*-*tert*-butyldimethylsilyl-2-deoxy-D-glucono-1,5-lactam (**8a**), 2-Acetamido-5-amino-4,6-*O*-benzylidene-3-*O*-*tert*-butyldimethylsilyl-2-deoxy-L-idono-1,5-lactam (**8b**)

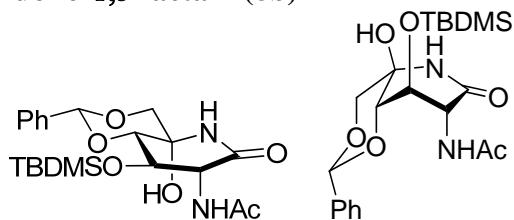

**8a:8b** = 2:3

Molecular sieves 4Å (10 g), 4-methylmorpholine *N*-oxide (3.23 g, 27.6 mmol) and tetra-*n*-propylammonium perruthenate (2.0 g, 5.7 mmol) were added to a solution of **13** (9.3 g, 21.2 mmol) in anhydrous CH<sub>2</sub>Cl<sub>2</sub> (200 mL). The reaction mixture was stirred for 40 h under a nitrogen atmosphere. The mixture was filtered and the solution was concentrated *in vacuo*. The crude product was purified by silica gel column chromatography (AcOEt) to afford the mixture of **8a** and **8b** (5.65 g, **8a**:**8b** = 2:3, 61%) as a white powder. <sup>1</sup>H NMR (500 MHz, CDCl<sub>3</sub>, of the mixture of **8a** and **8b**) δ -0.01 (s, 6/5H, A), 0.05 (s, 6/5H, A), 0.24 (s, 9/5H, B), 0.30 (s, 9/5H, B), 0.84 (s, 18/5H, A), 0.93 (s, 27/5H, B), 1.88 (s, 9/5H, B), 2.05 (s, 6/5H, A), 3.80 (d, *J* = 11.0 Hz, 2/5H, H-6a, A), 3.88 (d, *J* = 9.8 Hz, 2/5H, H-4, A), 3.97 (d, *J* = 12.4 Hz, 3/5H, H-6a, B), 4.00 (d, *J* = 11.0 Hz, 2/5H, H-6b, A), 4.03 (d, *J* = 12.2 Hz, 3/5H, H-6b, B), 4.18 (dd, *J* = 8.6, 8.6 Hz, 2/5H, H-2, A), 4.21 (dd, *J* = 0.7, 4.2 Hz, 3/5H, H-4, B), 4.27 (dd, *J* = 1.6, 4.0 Hz, 3/5H, H-3, B), 4.39 (dd, *J* = 8.6, 9.6 Hz, 2/5H, H-3, A), 4.67 (s, 2/5H, OH, A), 4.72 (dd, *J* = 1.6, 9.0 Hz, 3/5H, H-2, B), 4.73 (s, 3/5H, OH, B), 5.62 (s, 3/5H, CHPh, B), 5.64 (s, 2/5H, CHPh, A), 6.32 (d, *J* = 9.2 Hz, 3/5H, NHAc, B), 6.54 (s, 2/5H, NH, A), 6.68 (s, 3/5H, NH, B), 6.83 (d, *J* = 8.6 Hz, 2/5H, NHAc, A), 7.37–7.54 (m, 5H); <sup>13</sup>C NMR (126 MHz, CDCl<sub>3</sub>) δ -5.3, -4.6, -4.6, -4.1, 18.1, 18.3, 23.1, 23.2, 25.8, 25.9, 52.7 (C-2, B), 58.4 (C-2, A), 69.7 (C-3, A), 72.0 (C-3, B), 73.2 (C-6, A), 73.5 (C-6, B), 74.7 (C-5), 76.0 (C-4, B), 76.8 (C-5), 81.1 (C-4, A), 101.8 (CHPh, B), 102.9 (CHPh, A), 126.1, 126.5, 128.4, 128.8, 129.6, 129.9, 136.6, 136.6, 168.8, 169.6, 170.9, 171.6; HRMS (FAB) calcd for C<sub>21</sub>H<sub>33</sub>N<sub>2</sub>O<sub>6</sub>Si (M + H<sup>+</sup>) 437.2108, found 437.2108.

#### 2-Acetamido-4,6-*O*-benzylidene-1,5-(benzyloxycarbonyl)imino-3-*O*-*tert*-butyldimethylsilyl-1,2,5-trideoxy-D-glucitol (**14**)

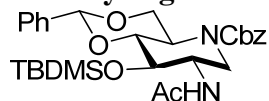

Borane dimethyl sulfide complex (2 M solution in THF, 45 mL, 90 mmol) was added dropwise to a solution of **8ab** (3.93 g, 9.0 mmol) in anhydrous CH<sub>2</sub>Cl<sub>2</sub> (400 mL) at 0 °C, and the reaction mixture was stirred for 18 h at room temperature under a nitrogen atmosphere. The mixture was slowly quenched by the addition of MeOH (80 mL), and then stirred for another 2 h. After removal of the solvents under reduced pressure, the crude product (4.1 g) was used for the next reaction without purification. A portion of the pure product (a white powder) was obtained by silica gel column chromatography (AcOEt/MeOH, 4:1) for characterization of the compound. <sup>1</sup>H NMR (500 MHz, CDCl<sub>3</sub>) δ -0.06 (s, 3H), 0.04 (s, 3H), 0.83 (s, 9H), 1.99 (s, 3H), 2.49 (dd, *J* = 11.1, 12.6 Hz, 1H), 2.75 (ddd, *J* = 4.6, 9.3, 10.3 Hz, 1H), 3.37 (dd, *J* = 9.0, 9.0 Hz, 1H), 3.38 (dd, *J* = 4.8, 12.7 Hz, 1H), 3.56–3.66 (m, 2H), 3.88 (m, 1H), 4.24 (dd, *J* = 4.7, 10.6 Hz, 1H), 5.34 (br d, *J* = 7.4 Hz, 1H), 5.51 (s, 1H), 7.32–7.52 (m, 5H); HRMS (FAB) calcd for C<sub>21</sub>H<sub>35</sub>N<sub>2</sub>O<sub>4</sub>Si (M + H<sup>+</sup>) 407.2366, found 407.2358.

Pyridine (5.4 mL, 54 mmol) and benzyloxycarbonyl chloride (1.92 mL, 13.5 mmol) were added to a solution of the crude product (obtained above, 4.1 g) in CH<sub>2</sub>Cl<sub>2</sub> (200 mL), and the reaction mixture was stirred for 1 h under a nitrogen atmosphere. Saturated NaHCO<sub>3</sub> was added to the mixture, and the resulting mixture was washed with AcOEt. The combined organic layer was washed with water and brine, dried over Na<sub>2</sub>SO<sub>4</sub>, and then concentrated under reduced pressure. The crude product was purified by silica gel column chromatography (AcOEt/hexane, 1:3) to afford **14** (1.41 g, 29% from **8ab**) as a white solid. <sup>1</sup>H NMR (500 MHz, CDCl<sub>3</sub>) δ -0.10 (s, 3H), -0.01 (s, 3H), 0.81 (s, 9H), 1.96 (s, 3H), 2.89 (dd, *J* = 10.3, 13.5 Hz, 1H, H-1a), 3.28 (ddd, *J* = 4.4, 10.0, 10.0 Hz, 1H, H-5), 3.64 (dd, *J* = 8.9, 8.9 Hz, 1H, H-3), 3.68 (dd, *J* = 8.4, 8.4 Hz, 1H, H-4), 3.84 (m, 1H, H-2), 4.35 (dd, *J* = 4.6, 13.6 Hz, 1H, H-1b), 4.42 (dd, *J* = 11.0, 11.0 Hz, 1H, H-6a), 4.79 (dd, *J* = 4.5, 11.5 Hz, 1H, H-6b), 5.08 and 5.15

(AB,  $J = 12.5$  Hz, 2H,  $\text{CH}_2\text{Ph}$ ), 5.33 (d,  $J = 7.2$  Hz, 1H,  $\text{NHAc}$ ), 5.52 (s, 1H,  $\text{CHPh}$ ), 7.30–7.49 (m, 10H);  $^{13}\text{C}$  NMR (126 MHz,  $\text{CDCl}_3$ )  $\delta$  -4.8, -3.8, 18.4, 23.7, 25.9, 47.8 (C-1), 53.0 (C-2), 55.2 (C-5), 67.7 ( $\text{CH}_2\text{Ph}$ ), 69.6 (C-6), 75.2 (C-4), 81.7 (C-3), 102.2 ( $\text{CHPh}$ ), 126.6, 128.3, 128.4, 128.8, 129.3, 136.3, 137.5, 154.9, 170.3; HRMS (FAB) calcd for  $\text{C}_{29}\text{H}_{41}\text{N}_2\text{O}_6\text{Si}$  ( $\text{M} + \text{H}^+$ ) 541.2734, found 541.2726.

**2-Acetamido-4,6-*O*-benzylidene-1,5-(benzyloxycarbonyl)imino-1,2,5-trideoxy-D-glucitol (7)**

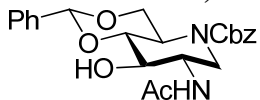

TBAF (1 M solution in THF, 3.27 mL, 3.27 mmol) was added to a solution of **14** (1.36 g, 2.52 mmol) in THF (100 mL), and the mixture was stirred for 24 h. After removal of the solvent, the crude product was purified by silica gel column chromatography ( $\text{AcOEt}/\text{CH}_2\text{Cl}_2$ , 10:1) to afford the product **7** (1.07 g, quant.) as a white solid.  $^1\text{H}$  NMR (500 MHz,  $\text{CDCl}_3$ )  $\delta$  2.02 (s, 3H,  $\text{CH}_3\text{CO}$ ), 2.84 (dd,  $J = 9.9, 13.5$  Hz, 1H, H-1a), 3.31 (ddd,  $J = 4.5, 9.8, 9.8$  Hz, 1H, H-5), 3.69 (dd,  $J = 8.6, 8.6$  Hz, 1H, H-3), 3.71 (dd,  $J = 8.1, 8.1$  Hz, 1H, H-4), 3.88 (m, 1H, H-2), 4.40 (dd,  $J = 11.0, 11.0$  Hz, 1H, H-6a), 4.46 (dd,  $J = 4.7, 13.7$  Hz, 1H, H-1b), 4.82 (dd,  $J = 4.5, 11.5$  Hz, 1H, H-6b), 5.10 and 5.17 (AB,  $J = 12.2$  Hz, 2H,  $\text{OCH}_2\text{Ph}$ ), 5.59 (s, 1H,  $\text{CHPh}$ ), 5.61 (d,  $J = 5.6$  Hz, 1H,  $\text{NH}$ ), 7.31–7.51 (m, 10H);  $^{13}\text{C}$  NMR (126 MHz,  $\text{CDCl}_3$ )  $\delta$  23.5, 47.4 (C-1), 52.2 (C-2), 55.0 (C-5), 67.8 ( $\text{OCH}_2\text{Ph}$ ), 69.4 (C-6), 74.5 (C-3), 80.9 (C-4), 101.8 ( $\text{CHPh}$ ), 126.5, 128.3, 128.5, 128.5, 128.9, 129.5, 136.1, 137.4, 155.0 (C=O), 171.6 (C=O); IR 3393, 3283, 1716, 1694, 1654, 1550, 1427, 1374, 1252, 1143, 1089  $\text{cm}^{-1}$ ; HRMS (ESI) calcd for  $\text{C}_{23}\text{H}_{27}\text{N}_2\text{O}_6$  ( $\text{M} + \text{H}^+$ ) 427.1864, found 427.1860.

**3-*O*-Acetyl-4,6-*O*-benzylidene-1,5-(benzyloxycarbonyl)imino-1,2,5-trideoxy-2-tosylamido-D-glucitol (15)**

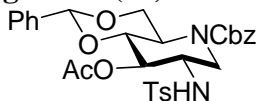

*p*-Toluenesulfonyl chloride (23 mg, 0.122 mmol) was added to a solution of **7** (26 mg, 0.061 mmol) in pyridine, and the mixture was refluxed for 30 h. The mixture was cooled to room temperature, and the solvent was removed under vacuum. The crude product was purified by silica gel column chromatography ( $\text{AcOEt}/\text{hexane}$ , 1:3) to afford **15** (27 mg, 76%) as a white solid. The colorless crystals for X-ray analysis were prepared from the recrystallization ( $\text{MeOH}/\text{H}_2\text{O}$ , 100:1).  $^1\text{H}$  NMR (500 MHz,  $\text{CDCl}_3$ )  $\delta$  1.75 (s, 3H,  $\text{CH}_3\text{CO}$ ), 2.41 (s, 3H,  $\text{CH}_3\text{Ph}$ ), 2.85 (dd,  $J = 11.4, 13.8$  Hz, 1H, H-1a), 3.31 (ddd,  $J = 4.6, 10.2, 10.2$  Hz, 1H, H-5), 3.37 (m, 1H, H-2), 3.69 (dd,  $J = 9.5, 9.5$  Hz, 1H, H-4), 4.47 (dd,  $J = 5.1, 13.9$  Hz, 1H, H-1b), 4.52 (dd,  $J = 11.1, 11.1$  Hz, 1H, H-6a), 4.74 (dd,  $J = 4.6, 11.8$  Hz, 1H, H-6b), 4.89 (dd,  $J = 9.6, 9.6$  Hz, 1H, H-3), 5.09 and 5.14 (AB,  $J = 12.3$  Hz, 2H,  $\text{OCH}_2\text{Ph}$ ), 5.27 (d,  $J = 7.0$  Hz, 1H,  $\text{NH}$ ), 5.48 (s, 1H,  $\text{CHPh}$ ), 7.24 (d,  $J = 8.0$  Hz, 2H), 7.28–7.46 (m, 10H), 7.68 (d,  $J = 8.2$  Hz, 2H);  $^{13}\text{C}$  NMR (126 MHz,  $\text{CDCl}_3$ )  $\delta$  20.8 ( $\text{CH}_3\text{CO}$ ), 21.7 ( $\text{CH}_3\text{Ph}$ ), 50.4 (C-1), 53.9 (C-2), 55.7 (C-5), 67.7 ( $\text{OCH}_2\text{Ph}$ ), 69.2 (C-6), 74.4 (C-3), 78.1 (C-4), 101.1 ( $\text{CHPh}$ ), 126.1, 127.1, 128.3, 128.4, 128.5, 128.9, 129.2, 129.9, 136.1, 137.3, 138.0, 143.7, 154.3 (C=O), 172.2 (C=O); IR 3257, 1740, 1703, 1683, 1598, 1441, 1376, 1334, 1244, 1158, 1092, 1034  $\text{cm}^{-1}$ ; HRMS (ESI) calcd for  $\text{C}_{30}\text{H}_{32}\text{N}_2\text{NaO}_8\text{S}$  ( $\text{M} + \text{Na}^+$ ) 603.1772, found 603.1764.

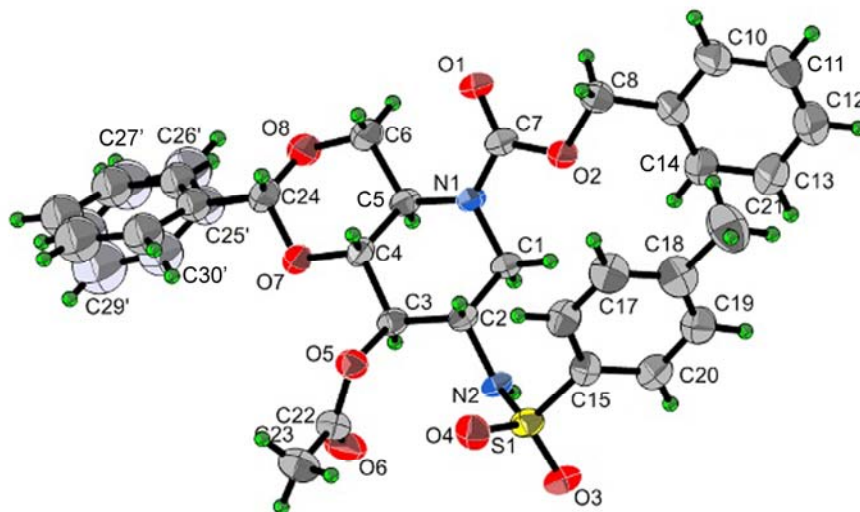

**Figure S10.** The ORTEP diagram of compound **15**, shown at 30% probability level. The disordered phenyl group (C25'-C30') was modeled as two partial occupancy, rigid-body six-membered rings. The occupancies of the two sites were summed to unity giving an approximate 0.54:0.46 ratio.

### 2-Acetamido-1,2,5-trideoxy-1,5-imino-D-glucitol hydrochloride (**3**)

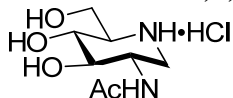

The compound **7** (50 mg, 117  $\mu$ mol) was dissolved in *i*-PrOH (5 mL), and 10 wt% Pd/C (50 mg) was added to the solution cautiously to avoid ignition. After the addition of conc.HCl (29  $\mu$ L, 0.35 mmol), the mixture was stirred for 17 h under hydrogen atmosphere and then the suspension was filtered through a layer of Celite. The Celite pad was washed well with *i*-PrOH, and the filtrate was concentrated under reduced pressure to afford the product **3** (28 mg, quant.) as a white powder.  $^1\text{H}$  NMR (500 MHz,  $\text{D}_2\text{O}$ )  $\delta$  2.01 (s, 3H,  $\text{CH}_3\text{CO}$ ), 2.97 (dd,  $J = 12.5, 12.5$  Hz, 1H, H-1a), 3.21 (ddd,  $J = 3.4, 5.0, 10.3$  Hz, 1H, H-5), 3.48 (dd,  $J = 4.8, 12.8$  Hz, 1H, H-1b), 3.60 (dd,  $J = 9.7, 9.7$  Hz, 1H, H-3), 3.66 (dd,  $J = 9.8, 9.8$  Hz, 1H, H-4), 3.88 (dd,  $J = 5.2, 12.8$  Hz, 1H, H-6a), 3.93 (dd,  $J = 3.0, 12.8$  Hz, 1H, H-6b), 4.05 (ddd,  $J = 4.8, 10.4, 12.0$  Hz, 1H, H-2);  $^{13}\text{C}$  NMR (126 MHz,  $\text{D}_2\text{O}$ )  $\delta$  22.1 ( $\text{CH}_3\text{CO}$ ), 44.2 (C-1), 48.2 (C-2), 57.7 (C-6), 60.0 (C-5), 68.5 (C-4), 73.5 (C-3), 174.7 (C=O); HRMS (FAB) calcd for  $\text{C}_8\text{H}_{17}\text{N}_2\text{O}_4$  ( $\text{M} + \text{H}^+$ ) 205.1188, found 205.1189.

### 2-Acetamido-4,6-*O*-benzylidene-1,5-(benzyloxycarbonyl)imino-3-*O*-[(1*R*)-1-carboxy]ethyl-1,2,5-trideoxy-D-glucitol (**16**)

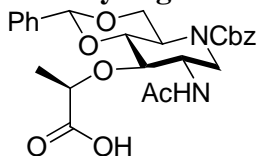



NaH (302 mg, 7.5 mmol, 60% dispersion in oil) was added to a solution of **7** (643 mg, 1.5 mmol) in anhydrous THF (15 mL), and the mixture was stirred at 60 °C for 30 min, and then (*S*)-2-chloropropionic acid (262 μL, 3.0 mmol) was added dropwise at 60 °C over 1 h. After stirring at 60 °C for 4 h, the mixture was stirred at room temperature for 16 h. MeOH was added to the mixture at 0 °C, and the resulting mixture was concentrated under reduced pressure. CH<sub>2</sub>Cl<sub>2</sub> and AcOEt were added to the residue, and the resulting suspension was washed with 1 M HCl, water, and then brine. The organic layer was dried over Na<sub>2</sub>SO<sub>4</sub>, and then concentrated to dryness. The residue was washed with MeOH and AcOEt to afford the product **16** (684 mg, 91%) as a white solid. <sup>1</sup>H NMR (500 HMz, CDCl<sub>3</sub>/CD<sub>3</sub>OD, 95:5) δ 1.42 (d, *J* = 7.0 Hz, 3H, OCHCH<sub>3</sub>), 2.00 (s, 3H, CH<sub>3</sub>CO), 2.44 (dd, *J* = 11.0, 13.2 Hz, 1H, H-1a), 3.20 (ddd, *J* = 4.5, 10.1, 10.1 Hz, 1H, H-5), 3.45 (dd, *J* = 9.0, 10.0 Hz, 1H, H-3), 3.61 (ddd, *J* = 4.6, 10.5, 10.5 Hz, 1H, H-2), 3.81 (dd, *J* = 9.2, 9.2 Hz, 1H, H-4), 4.52 (dd, *J* = 11.1, 11.1 Hz, 1H, H-6a), 4.60 (q, *J* = 7.1 Hz, 1H, OCHCH<sub>3</sub>), 4.81 (dd, *J* = 4.6, 11.8 Hz, 1H, H-6b), 4.94 (dd, *J* = 4.6, 13.4 Hz, 1H, H-1b), 5.08 and 5.11 (AB, *J* = 12.6 Hz, 2H, OCH<sub>2</sub>Ph), 5.58 (s, 1H, CHPh), 7.25–7.46 (m, 10H); <sup>13</sup>C NMR (126 MHz, CDCl<sub>3</sub>/CD<sub>3</sub>OD, 95:5) δ 18.8 (OCHCH<sub>3</sub>), 23.0 (CH<sub>3</sub>CO), 48.2 (C-1), 51.2 (C-2), 55.9 (C-5), 67.5 (OCH<sub>2</sub>Ph), 69.3 (C-6), 75.2 (OCHCH<sub>3</sub>), 79.8 (C-3), 82.2 (C-4), 101.0 (CHPh), 125.8, 127.9, 128.2, 128.5, 128.7, 129.1, 136.2, 137.5, 154.7 (C=O), 172.5 (C=O), 177.5 (C=O); HRMS (ESI) calcd for C<sub>26</sub>H<sub>31</sub>N<sub>2</sub>O<sub>8</sub> (M + H<sup>+</sup>) 499.2075, found 499.2057.

**2-Acetamido-3-*O*-[(1*R*)-1-carboxy]ethyl-1,2,5-trideoxy-1,5-imino-D-glucitol hydrochloride (**4**)**

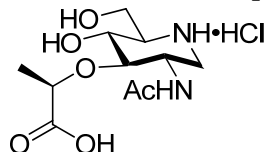

Compound **16** (40 mg, 80 μmol) was dissolved in *i*-PrOH (3 mL) and 10 wt% Pd/C (40 mg) was added to the solution cautiously to avoid ignition. After the addition of conc.HCl (13 μL, 0.16 mmol), the mixture was stirred for 18 h under hydrogen atmosphere and the suspension was filtered through a layer of Celite. The Celite pad was washed well with *i*-PrOH, and the filtrate was concentrated under reduced pressure to afford the product **4** (25 mg, quant.) as a white powder. <sup>1</sup>H NMR (500 HMz, D<sub>2</sub>O) δ 1.41 (d, *J* = 7.0 Hz, 3H, OCHCH<sub>3</sub>), 1.97 (s, 3H, CH<sub>3</sub>CO), 2.95 (dd, *J* = 12.6, 12.6 Hz, 1H, H-1a), 3.21 (ddd, *J* = 3.6, 4.4, 10.5 Hz, 1H, H-5), 3.49 (dd, *J* = 4.8, 12.8 Hz, 1H, H-1b), 3.61 (dd, *J* = 9.7, 9.7 Hz, 1H, H-3), 3.74 (dd, *J* = 9.8, 9.8 Hz, 1H, H-4), 3.87 (dd, *J* = 4.9, 12.7 Hz, 1H, H-6a), 3.92 (dd, *J* = 2.9, 12.9 Hz, 1H, H-6b), 4.06 (ddd, *J* = 4.8, 11.3, 11.3 Hz, 1H, H-2), 4.44 (q, *J* = 6.9 Hz, 1H, OCHCH<sub>3</sub>); <sup>13</sup>C NMR (126 MHz, D<sub>2</sub>O) δ 18.6 (OCHCH<sub>3</sub>), 22.4 (CH<sub>3</sub>CO), 44.1 (C-1), 47.6 (C-2), 57.6 (C-6), 60.0 (C-5), 69.3 (C-4), 77.6 (OCHCH<sub>3</sub>), 82.3 (C-3), 174.5 (C=O), 177.4 (C=O); HRMS (ESI) calcd for C<sub>11</sub>H<sub>21</sub>N<sub>2</sub>O<sub>6</sub> (M + H<sup>+</sup>) 277.1394, found 277.1404.

**2-Acetamido-4,6-*O*-benzylidene-1,5-(benzyloxycarbonyl)imino-1,2,5-trideoxy-3-*O*-[(1*R*)-1-(4-nitrophenoxy)carbonyl]ethyl-D-glucitol (**17**)**

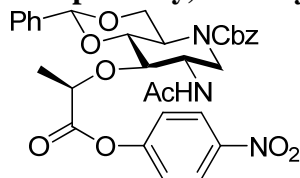

Pyridine (0.50 mL, 6.21 mmol) and *p*-nitrophenyl trifluoroacetate (773 mg, 3.29 mmol) were added to a solution of **16** (410 mg, 0.82 mmol) in anhydrous CH<sub>2</sub>Cl<sub>2</sub> (15 mL), and then the mixture was added TEA (0.23 mL, 1.64 mmol) and stirred for 23 h. After the addition of water, the mixture was extracted with AcOEt. The combined organic layer was washed with water and brine, then dried over Na<sub>2</sub>SO<sub>4</sub>, and then concentrated to dryness. The resulting yellow residue was washed with AcOEt to afford the product **17** (367 mg, 72%) as a white solid. <sup>1</sup>H NMR (500 MHz, CDCl<sub>3</sub>) δ 1.64 (d, *J* = 7.0 Hz, 3H, OCHCH<sub>3</sub>), 1.97 (s, 3H, CH<sub>3</sub>CO), 2.49 (dd, *J* = 10.9, 13.5 Hz, 1H, H-1a), 3.25 (ddd, *J* = 4.6, 10.1, 10.1 Hz, 1H, H-5), 3.52 (dd, *J* = 8.8, 10.2 Hz, 1H, H-3), 3.73 (ddd, *J* = 4.4, 10.4, 14.8 Hz, 1H, H-2), 3.81 (dd, *J* = 9.4, 9.4 Hz, 1H, H-4), 4.58 (dd, *J* = 11.1, 11.1 Hz, 1H, H-6a), 4.88 (dd, *J* = 4.6, 11.8 Hz, 1H, H-6b), 4.94 (dd, *J* = 5.0, 13.8 Hz, 1H, H-1b), 4.95 (q, *J* = 7.0 Hz, 1H, OCHCH<sub>3</sub>), 5.11 and 5.15 (AB, *J* = 12.5 Hz, 2H, OCH<sub>2</sub>Ph), 5.65 (s, 1H, CHPh), 7.25–7.51 (m, 12H), 8.30 (d, *J* = 9.2 Hz, 2H); <sup>13</sup>C NMR (126 MHz, CDCl<sub>3</sub>) δ 18.9 (OCHCH<sub>3</sub>), 23.5 (CH<sub>3</sub>CO), 48.4 (C-1), 51.2 (C-2), 55.9 (C-5), 67.5 (OCH<sub>2</sub>Ph), 69.5 (C-6), 75.2 (OCHCH<sub>3</sub>), 80.3 (C-3), 82.3 (C-4), 101.1 (CHPh), 122.5, 125.8, 125.9, 128.1, 128.3, 128.6, 128.8, 128.8, 129.3, 136.4, 137.6, 145.9, 154.7 (C=O), 171.5 (C=O), 173.9 (C=O); HRMS (ESI) calcd for C<sub>32</sub>H<sub>34</sub>N<sub>3</sub>O<sub>10</sub> (M + H<sup>+</sup>) 620.2239, found 620.2222.

***N*-{2-*O*-[2-Acetamido-4,6-*O*-benzylidene-1,5-(benzyloxycarbonyl)imino-1,2,5-trideoxy-D-glucitol-3-yl]-D-lactoyl}-L-alanine benzyl ester (**18**)**

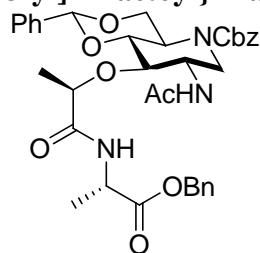

Triethylamine (13 μL, 89 μmol) was added to a solution of L-alanine benzyl ester hydrochloride (19 mg, 89 μmol) in THF/CH<sub>2</sub>Cl<sub>2</sub> (6 mL, 1:1), and the mixture was stirred for 15 min. Compound **17** (50 mg, 81 μmol) was added to the mixture, and then the mixture was stirred for 40 h. The volatiles were removed under reduced pressure, and the resulting residue was washed with AcOEt to afford the product **18** (45 mg, 85%) as a white solid. <sup>1</sup>H NMR (500 MHz, CDCl<sub>3</sub>) δ 1.37 (d, *J* = 6.8 Hz, 3H, OCHCH<sub>3</sub>), 1.43 (d, *J* = 7.2 Hz, 3H, NHCHCH<sub>3</sub>), 1.98 (s, 3H, CH<sub>3</sub>CO), 2.58 (dd, *J* = 10.4, 13.4 Hz, 1H, H-1a), 3.22 (ddd, *J* = 4.5, 10.2, 10.2 Hz, 1H, H-5), 3.44 (dd, *J* = 9.1, 9.1 Hz, 1H, H-3), 3.76 (m, 1H, H-2), 3.80 (dd, *J* = 8.8, 9.6 Hz, 1H, H-4), 4.40 (q, *J* = 6.7 Hz, 1H, OCHCH<sub>3</sub>), 4.48 (dd, *J* = 11.1, 11.1 Hz, 1H, H-6a), 4.57 (dq, *J* = 7.2, 7.2 Hz, 1H, NHCHCH<sub>3</sub>), 4.70 (dd, *J* = 4.7, 13.5 Hz, 1H, H-1b), 4.82 (dd, *J* = 4.6, 11.6 Hz, 1H, H-6b), 5.09 and 5.15 (AB, *J* = 12.4 Hz, 2H, NCOOCH<sub>2</sub>Ph), 5.19 (s, 2H, CHCOOCH<sub>2</sub>Ph), 5.57 (s, 1H, CHPh), 6.52 (d, *J* = 7.2 Hz, 1H, CONHCH), 7.29–7.49 (m, 15H), 7.52 (d, *J* = 4.0 Hz, 1H, NHAc); <sup>13</sup>C NMR (126 MHz, CDCl<sub>3</sub>) δ 18.1 (NHCHCH<sub>3</sub>), 19.8 (OCHCH<sub>3</sub>), 23.5 (CH<sub>3</sub>CO), 48.0 (C-1), 48.5 (NHCHCH<sub>3</sub>), 51.3 (C-2), 55.5 (C-5), 67.5 (CHCOOCH<sub>2</sub>Ph), 67.5 (NCOOCH<sub>2</sub>Ph), 69.5 (C-6), 76.8 (OCHCH<sub>3</sub>), 80.6 (C-3), 81.7 (C-4), 101.3 (CHPh), 126.1, 128.1, 128.3, 128.4, 128.6, 128.7, 128.8, 128.9, 129.3, 135.4, 136.4, 137.7, 154.8 (C=O), 171.5 (C=O), 172.6 (C=O), 174.1 (C=O); HRMS (ESI) calcd for C<sub>36</sub>H<sub>42</sub>N<sub>3</sub>O<sub>9</sub> (M + H<sup>+</sup>) 660.2916, found 660.2883.

***N*-[2-*O*-[2-Acetamido-1,2,5-trideoxy-1,5-imino-*D*-glucitol-3-yl]-*D*-lactoyl]-*L*-alanine hydrochloride (5)**

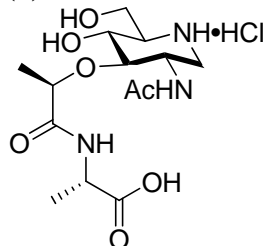

The compound **18** (30 mg, 45  $\mu\text{mol}$ ) was dissolved in *i*-PrOH (3 mL), and 10 wt% Pd/C (30 mg) was added to the solution cautiously to avoid ignition. After the addition of conc.HCl (7.6  $\mu\text{L}$ , 91  $\mu\text{mol}$ ), the mixture was stirred for 40 h under hydrogen atmosphere and filtered through a layer of Celite. The Celite pad was washed well with *i*-PrOH, and the filtrate was concentrated under reduced pressure to afford the product **5** (17 mg, quant.) as a white powder.  $^1\text{H}$  NMR (500 HMz,  $\text{D}_2\text{O}$ )  $\delta$  1.37 (d,  $J = 6.8$  Hz, 3H,  $\text{CHCH}_3$ ), 1.42 (d,  $J = 7.4$  Hz, 3H,  $\text{CHCH}_3$ ), 1.95 (s, 3H,  $\text{CH}_3\text{CO}$ ), 2.95 (dd,  $J = 12.6, 12.6$  Hz, 1H, H-1a), 3.23 (ddd,  $J = 3.4, 4.6, 10.8$  Hz, 1H, H-5), 3.46 (dd,  $J = 5.0, 12.8$  Hz, 1H, H-1b), 3.56 (dd,  $J = 9.1, 10.3$  Hz, 1H, H-3), 3.76 (dd,  $J = 9.1, 10.9$  Hz, 1H, H-4), 3.89 (dd,  $J = 4.8, 12.8$  Hz, 1H, H-6a), 3.93 (dd,  $J = 3.4, 12.8$  Hz, 1H, H-6b), 4.15 (ddd,  $J = 4.9, 10.3, 12.3$  Hz, 1H, H-2), 4.30 (q,  $J = 6.9$  Hz, 1H,  $\text{CHCH}_3$ ), 4.32 (q,  $J = 7.4$  Hz, 1H,  $\text{CHCH}_3$ );  $^{13}\text{C}$  NMR (126 MHz,  $\text{D}_2\text{O}$ )  $\delta$  16.1 ( $\text{CHCH}_3$ ), 18.7 ( $\text{CHCH}_3$ ), 22.2 ( $\text{CH}_3\text{CO}$ ), 44.2 (C-1), 47.8 (C-2), 48.7 ( $\text{NHCHCH}_3$ ), 57.6 (C-6), 59.9 (C-5), 67.7 (C-4), 78.5 ( $\text{OCHCH}_3$ ), 82.0 (C-3), 174.3 (C=O), 175.7 (C=O), 176.5 (C=O); HRMS (ESI) calcd for  $\text{C}_{14}\text{H}_{25}\text{N}_3\text{NaO}_7$  ( $\text{M} + \text{Na}^+$ ) 370.1585, found 370.1576.

**Scheme S1. Synthesis of Compound 25**

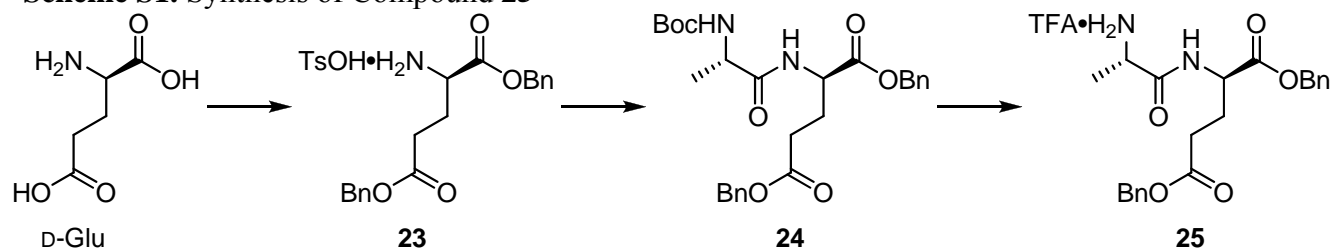

**Dibenzyl D-glutamate *p*-toluenesulfonate (23)**

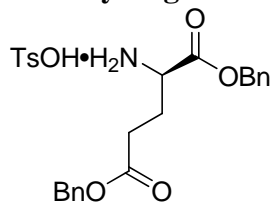

A mixture of D-glutamic acid (1.5 g, 10.2 mmol), *p*-toluenesulfonic acid monohydrate (2.33 g, 12.2 mmol) and benzyl alcohol (26 mL) in benzene (80 mL) was refluxed for 26 h with the removal of water in a Dean-Stark apparatus. The clear solution was cooled to room temperature and concentrated to half the volume under reduced pressure. The resulting solution was poured into  $\text{Et}_2\text{O}$  (200 mL) in an ice-water bath, and the mixture was stirred for 2 h at that temperature. The precipitate was recovered by filtration, and washed with  $\text{Et}_2\text{O}$  to afford the title compound (3.90 g, 77%) as a white solid.  $^1\text{H}$  NMR

(500 HMz, CDCl<sub>3</sub>)  $\delta$  2.18 (m, 2H, CHCH<sub>2</sub>CH<sub>2</sub>), 2.24 (CH<sub>3</sub>Ph), 2.39 (dt,  $J$  = 7.2, 17.6 Hz, 1H, CHCH<sub>2</sub>CH<sub>2</sub>), 2.51 (dt,  $J$  = 7.4, 17.8 Hz, 1H, CHCH<sub>2</sub>CH<sub>2</sub>), 1.37 (d,  $J$  = 6.8 Hz, 3H, CHCH<sub>3</sub>), 1.42 (d,  $J$  = 7.4 Hz, 3H, CHCH<sub>3</sub>), 4.14 (m, 1H, CHCH<sub>2</sub>CH<sub>2</sub>), 4.87–5.06 (m, 4H, CH<sub>2</sub>Ph), 6.97 (d,  $J$  = 7.8 Hz, 2H, Ts), 7.14–7.32 (m, 10H), 7.71 (d,  $J$  = 8.0 Hz, 2H, Ts), 8.30 (d,  $J$  = 3.0 Hz, 1H, NH); <sup>13</sup>C NMR (126 MHz, CDCl<sub>3</sub>)  $\delta$  21.5 (CH<sub>3</sub>Ph), 25.3 (CHCH<sub>2</sub>CH<sub>2</sub>), 29.5 (CHCH<sub>2</sub>CH<sub>2</sub>), 52.6 (CHCH<sub>2</sub>CH<sub>2</sub>), 66.6 and 68.1 (CH<sub>2</sub>Ph), 126.2, 128.3, 128.3, 128.5, 128.6, 128.7, 128.7, 129.1, 134.8, 135.9, 140.6, 141.2, 169.0 (C=O), 172.2 (C=O); HRMS (ESI) calcd for C<sub>19</sub>H<sub>22</sub>NO<sub>4</sub> (M + H<sup>+</sup>) 328.1543, found 328.1546.

**Dibenzyl N-[N-(*tert*-butoxycarbonyl)-L-alanyl]-D-glutamate (24)**

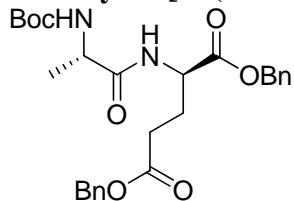

Triethylamine (0.34 mL, 2.4 mmol) and 1-[3-(dimethylamino)propyl]-3-ethylcarbodiimide hydrochloride (280 mg, 1.4 mmol) were added to a solution of **23** (300 mg, 0.60 mmol) in CH<sub>2</sub>Cl<sub>2</sub> (10 mL), and the mixture was stirred for 10 min. Boc-L-alanine (114 mg, 0.60 mmol) was added to the mixture, and the mixture was stirred at room temperature for 40 h. After the addition of water, the mixture was washed with AcOEt. The combined organic layer was washed with water and brine, and dried over Na<sub>2</sub>SO<sub>4</sub>. The solvent was removed under reduced pressure, and the resulting residue was purified by silica gel column chromatography (AcOEt/hexane, 1:3 to 1:2) to afford the title compound (214 mg, 71%) as a white solid. <sup>1</sup>H NMR (500 HMz, CDCl<sub>3</sub>)  $\delta$  1.34 (d,  $J$  = 7.2 Hz, 3H, CHCH<sub>3</sub>), 1.44 (s, 9H, *t*-Bu), 2.03 (m, 1H, CHCH<sub>2</sub>CH<sub>2</sub>), 2.26 (m, 1H, CHCH<sub>2</sub>CH<sub>2</sub>), 2.41 (m, 2H, CHCH<sub>2</sub>CH<sub>2</sub>), 4.20 (br s, 1H, CHCH<sub>3</sub>), 4.65 (dt,  $J$  = 5.0, 8.0 Hz, 1H, CHCH<sub>2</sub>CH<sub>2</sub>), 4.97 (br s, 1H, NHCHCH<sub>3</sub>), 5.08 and 5.11 (AB,  $J$  = 12.5 Hz, 2H, CH<sub>2</sub>Ph), 5.14 and 5.17 (AB,  $J$  = 12.3 Hz, 2H, CH<sub>2</sub>Ph), 6.92 (br s, 1H, NHCHCH<sub>2</sub>), 7.30–7.39 (m, 10H); <sup>13</sup>C NMR (126 MHz, CDCl<sub>3</sub>)  $\delta$  18.3 (CHCH<sub>3</sub>), 27.3 (CHCH<sub>2</sub>CH<sub>2</sub>), 28.4 (C(CH<sub>3</sub>)<sub>3</sub>), 30.2 (CHCH<sub>2</sub>CH<sub>2</sub>), 50.3 (CHCH<sub>3</sub>), 51.8 (CHCH<sub>2</sub>CH<sub>2</sub>), 66.7 and 67.5 (CH<sub>2</sub>Ph), 80.4 (C(CH<sub>3</sub>)<sub>3</sub>), 128.4, 128.5, 128.7, 128.7, 128.8, 135.3, 135.9, 155.7 (C=O), 171.6 (C=O), 172.7 (C=O), 172.8 (C=O); HRMS (ESI) calcd for C<sub>27</sub>H<sub>35</sub>N<sub>2</sub>O<sub>7</sub> (M + H<sup>+</sup>) 499.2439, found 499.2421.

**Dibenzyl N-(L-alanyl)-D-glutamate trifluoroacetate (25)**

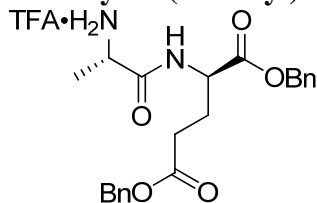

Trifluoroacetic acid (0.26 mL, 3.4 mmol) was slowly added to a solution of **24** (170 mg, 0.34 mmol) in CH<sub>2</sub>Cl<sub>2</sub> (10 mL), and the mixture was stirred at room temperature for 40 h. The solvent and extra reagent were removed under vacuum to afford the title compound (174 mg, quant.) as a colorless oil. <sup>1</sup>H NMR (500 HMz, CDCl<sub>3</sub>)  $\delta$  1.47 (d,  $J$  = 6.6 Hz, 3H, CHCH<sub>3</sub>), 2.01 (m, 1H, CHCH<sub>2</sub>CH<sub>2</sub>), 2.16 (m, 1H, CHCH<sub>2</sub>CH<sub>2</sub>), 2.38 (t,  $J$  = 7.1 Hz, 2H, CHCH<sub>2</sub>CH<sub>2</sub>), 4.27 (br s, 1H, CHCH<sub>3</sub>), 4.65 (dt,  $J$  = 5.6, 7.5 Hz, 1H, CHCH<sub>2</sub>CH<sub>2</sub>), 5.04 and 5.07 (AB,  $J$  = 12.2 Hz, 2H, CH<sub>2</sub>Ph), 5.06 and 5.12 (AB,  $J$  = 12.1 Hz, 2H, CH<sub>2</sub>Ph), 7.24–7.35 (m, 10H), 7.84 (d,  $J$  = 7.4 Hz, 1H, NHCHCH<sub>2</sub>), 7.89 (br s, 2H); <sup>13</sup>C NMR (126

MHz, CDCl<sub>3</sub>)  $\delta$  17.2 (CHCH<sub>3</sub>), 26.6 (CHCH<sub>2</sub>CH<sub>2</sub>), 30.2 (CHCH<sub>2</sub>CH<sub>2</sub>), 49.9 (CHCH<sub>3</sub>), 52.3 (CHCH<sub>2</sub>CH<sub>2</sub>), 67.1 and 68.0 (CH<sub>2</sub>Ph), 128.4, 128.5, 128.6, 128.8, 128.9, 134.9, 135.6, 170.4 (C=O), 171.6 (C=O), 173.1 (C=O); HRMS (ESI) calcd for C<sub>22</sub>H<sub>27</sub>N<sub>2</sub>O<sub>5</sub> (M + H<sup>+</sup>) 399.1914, found 399.1888.

**Dibenzyl *N*-{2-*O*-[2-acetamido-4,6-*O*-benzylidene-1,5-(benzyloxycarbonyl)imino-1,2,5-trideoxy-D-glucitol-3-yl]-D-lactoyl}-L-alanyl-D-glutamate (19)**

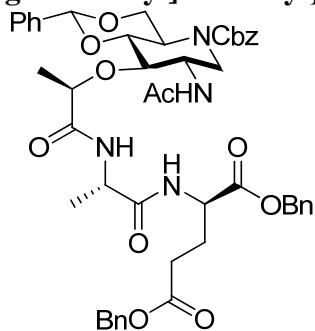

Triethylamine (15  $\mu$ L, 107  $\mu$ mol) was added to a solution of amine salt **25** (54 mg, 107  $\mu$ mol) in THF/CH<sub>2</sub>Cl<sub>2</sub> (6 mL, 1:1), and the mixture was stirred for 15 min. Compound **17** (60 mg, 97  $\mu$ mol) was added to the mixture and the mixture was stirred for 40 h. The solvents and extra reagent were removed under reduced pressure, and the resulting residue was washed with AcOEt to afford the title compound (77 mg, 90%) as a white solid. <sup>1</sup>H NMR (500 MHz, CDCl<sub>3</sub>)  $\delta$  1.33 (d, *J* = 7.0 Hz, 3H, CHCH<sub>3</sub>), 1.37 (d, *J* = 6.8 Hz, 3H, CHCH<sub>3</sub>), 1.99 (s, 3H, CH<sub>3</sub>CO), 2.04 (m, 1H, CHCH<sub>2</sub>CH<sub>2</sub>), 2.24 (m, 1H, CHCH<sub>2</sub>CH<sub>2</sub>), 2.36 (dt, *J* = 7.1, 17.4 Hz, 1H, CHCH<sub>2</sub>CH<sub>2</sub>), 2.45 (dt, *J* = 7.5, 17.0 Hz, 1H, CHCH<sub>2</sub>CH<sub>2</sub>), 2.63 (dd, *J* = 10.3, 13.3 Hz, 1H, H-1a), 3.23 (ddd, *J* = 4.6, 10.2, 10.2 Hz, 1H, H-5), 3.52 (dd, *J* = 9.1, 9.1 Hz, 1H, H-3), 3.76 (m, 1H, H-2), 3.79 (dd, *J* = 9.3, 9.3 Hz, 1H, H-4), 4.39–4.49 (m, 3H, H-6a, OCHCH<sub>3</sub>, and NHCHCH<sub>3</sub>), 4.63 (m, 2H, H-1b and CHCH<sub>2</sub>CH<sub>2</sub>), 4.80 (dd, *J* = 4.4, 11.6 Hz, 1H, H-6b), 5.05–5.19 (m, 6H, NCOOCH<sub>2</sub>Ph, CHCOOCH<sub>2</sub>Ph, and CH<sub>2</sub>COOCH<sub>2</sub>Ph), 5.56 (s, 1H, CHPh), 6.59 (d, *J* = 7.2 Hz, 1H, CONHCHCH<sub>3</sub>), 7.07 (d, *J* = 7.8 Hz, 1H, CONHCHCH<sub>2</sub>), 7.26–7.48 (m, 20H), 7.69 (d, *J* = 4.0 Hz, 1H, NHAc); <sup>13</sup>C NMR (126 MHz, CDCl<sub>3</sub>)  $\delta$  17.7 (CHCH<sub>3</sub>), 19.8 (CHCH<sub>3</sub>), 23.5 (CH<sub>3</sub>CO), 27.1 (CHCH<sub>2</sub>CH<sub>2</sub>), 30.3 (CHCH<sub>2</sub>CH<sub>2</sub>), 47.7 (C-1), 49.0 (NHCHCH<sub>3</sub>), 51.4 (C-2), 52.0 (CHCH<sub>2</sub>CH<sub>2</sub>), 55.2 (C-5), 66.9 (CH<sub>2</sub>Ph), 67.5 (CH<sub>2</sub>Ph), 67.6 (CH<sub>2</sub>Ph), 69.5 (C-6), 76.7 (OCHCH<sub>3</sub>), 80.2 (C-3), 81.9 (C-4), 101.3 (CHPh), 126.1, 128.1, 128.3, 128.3, 128.5, 128.6, 128.6, 128.7, 128.8, 128.8, 129.2, 135.2, 135.7, 136.4, 137.7, 154.9 (C=O), 171.6 (C=O), 171.6 (C=O), 171.9 (C=O), 172.7 (C=O), 174.6 (C=O); HRMS (ESI) calcd for C<sub>48</sub>H<sub>54</sub>N<sub>4</sub>NaO<sub>12</sub> (M + Na<sup>+</sup>) 901.3630, found 901.3602.

***N*-{2-*O*-[2-Acetamido-1,2,5-trideoxy-1,5-imino-D-glucitol-3-yl]-D-lactoyl}-L-alanyl-D-glutamine hydrochloride (6)**

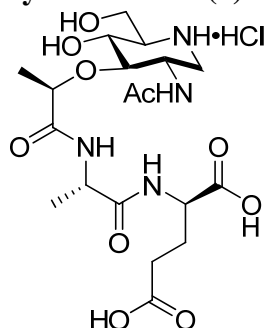

Compound **19** (45 mg, 51  $\mu\text{mol}$ ) was dissolved in *i*-PrOH (3 mL), and 10 wt% Pd/C (45 mg) was added to the solution cautiously to avoid ignition. After the addition of conc. HCl (8.5  $\mu\text{L}$ , 102  $\mu\text{mol}$ ), the mixture was stirred for 40 h under hydrogen atmosphere and was filtered through a layer of Celite. The Celite pad was washed well with *i*-PrOH, and the filtrate was concentrated under reduced pressure to afford **6** (26 mg, quant.) as a white powder.  $^1\text{H}$  NMR (500 MHz,  $\text{D}_2\text{O}$ )  $\delta$  1.33 (d,  $J = 6.8$  Hz, 3H,  $\text{CHCH}_3$ ), 1.37 (d,  $J = 7.4$  Hz, 3H,  $\text{CHCH}_3$ ), 1.91 (s, 3H,  $\text{CH}_3\text{CO}$ ), 1.95 (m, 1H,  $\text{CHCH}_2\text{CH}_2$ ), 2.19 (m, 1H,  $\text{CHCH}_2\text{CH}_2$ ), 2.43 (t,  $J = 7.1$  Hz, 2H,  $\text{CHCH}_2\text{CH}_2$ ), 2.91 (dd,  $J = 12.5, 12.5$  Hz, 1H, H-1a), 3.21 (ddd,  $J = 3.5, 4.6, 10.7$  Hz, 1H, H-5), 3.46 (dd,  $J = 4.8, 12.8$  Hz, 1H, H-1b), 3.53 (dd,  $J = 9.7, 9.7$  Hz, 1H, H-3), 3.74 (dd,  $J = 9.1, 10.7$  Hz, 1H, H-4), 3.87 (dd,  $J = 4.8, 13.0$  Hz, 1H, H-6a), 3.90 (dd,  $J = 3.3, 12.9$  Hz, 1H, H-6b), 4.11 (ddd,  $J = 4.9, 10.5, 12.1$  Hz, 1H, H-2), 4.26 (q,  $J = 7.2$  Hz, 1H,  $\text{NHCHCH}_3$ ), 4.31 (q,  $J = 6.8$  Hz, 1H,  $\text{OCHCH}_3$ ), 4.41 (dd,  $J = 5.0, 9.6$  Hz, 1H,  $\text{CHCH}_2\text{CH}_2$ );  $^{13}\text{C}$  NMR (126 MHz,  $\text{D}_2\text{O}$ )  $\delta$  16.9 ( $\text{CHCH}_3$ ), 18.7 ( $\text{CHCH}_3$ ), 22.2 ( $\text{CH}_3\text{CO}$ ), 25.9 ( $\text{CHCH}_2\text{CH}_2$ ), 30.0 ( $\text{CHCH}_2\text{CH}_2$ ), 44.1 (C-1), 47.7 (C-2), 49.7 ( $\text{NHCHCH}_3$ ), 51.9 ( $\text{CHCH}_2\text{CH}_2$ ), 57.6 (C-6), 59.9 (C-5), 67.7 (C-4), 78.2 ( $\text{OCHCH}_3$ ), 81.7 (C-3), 174.3 ( $\text{C}=\text{O}$ ), 174.7 ( $\text{C}=\text{O}$ ), 175.0 ( $\text{C}=\text{O}$ ), 175.5 ( $\text{C}=\text{O}$ ), 177.0 ( $\text{C}=\text{O}$ ); HRMS (ESI) calcd for  $\text{C}_{19}\text{H}_{32}\text{N}_4\text{NaO}_{10}$  ( $\text{M} + \text{Na}^+$ ) 499.2011, found 499.2026.

TY2-297

exp1 s2pul

|             |             |            |         |
|-------------|-------------|------------|---------|
| SAMPLE      |             | DEC. & VT  |         |
| date        | Mar 22 2009 | dfrq       | 499.866 |
| solvent     | DMSO        | dn         | H1      |
| file        | exp         | dpwr       | 30      |
| ACQUISITION |             | dof        | 0       |
| sfrq        | 499.866     | dm         | nnn     |
| tn          | H1          | dmm        | c       |
| at          | 5.016       | dmf        | 200     |
| np          | 65536       | dseq       |         |
| sw          | 6533.3      | dres       | 1.0     |
| fb          | 4000        | homo       | n       |
| bs          | 4           | DEC2       |         |
| tpwr        | 61          | dfrq2      | 0       |
| pw          | 13.5        | dn2        |         |
| d1          | 0.100       | dpwr2      | 1       |
| tof         | 269.9       | dof2       | 0       |
| nt          | 16          | dm2        | n       |
| ct          | 16          | dmm2       | c       |
| alock       | n           | dmf2       | 200     |
| gain        | not used    | dseq2      |         |
| FLAGS       |             | dres2      | 1.0     |
| il          | n           | homo2      | n       |
| in          | n           | DEC3       |         |
| dp          | y           | dfrq3      | 0       |
| hs          | nn          | dn3        |         |
| DISPLAY     |             | dpwr3      | 1       |
| sp          | -99.5       | dof3       | 0       |
| wp          | 5099.3      | dm3        | n       |
| vs          | 29          | dmm3       | c       |
| sc          | 0           | dmf3       | 200     |
| wc          | 250         | dseq3      |         |
| hzmm        | 20.40       | dres3      | 1.0     |
| is          | 91.80       | homo3      | n       |
| rfl         | 1752.7      | PROCESSING |         |
| rfp         | 1249.7      | wf file    |         |
| th          | 7           | proc       | ft      |
| ins         | 1.000       | fn         | 65536   |
| ai          | ph          | math       | f       |

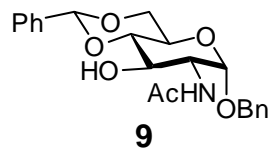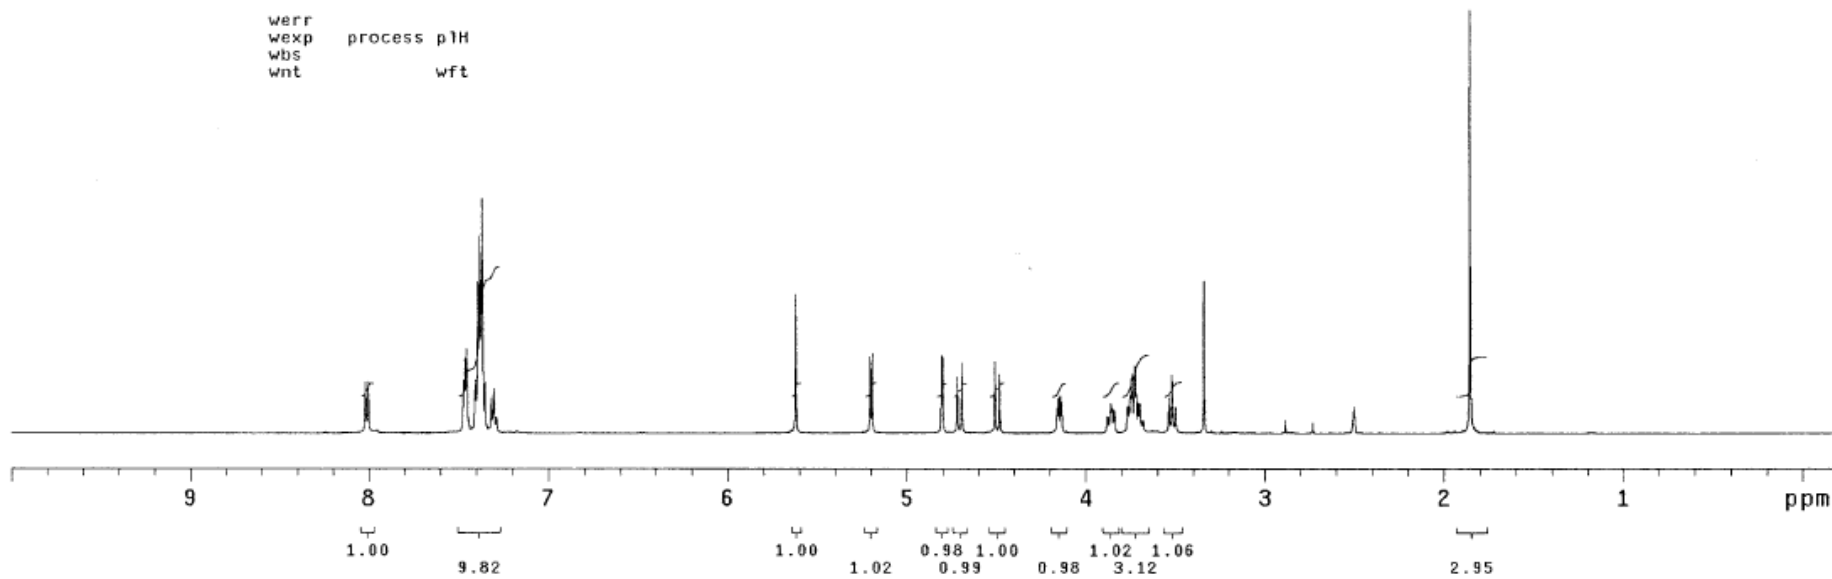

TY2-297

exp2 s2pu1

```
SAMPLE          DEC. & VT
date Jun 20 2009 dfrq      499.866
solvent DMSO      dn        H1
file      exp    dpwr      40
ACQUISITION    dof        0
sfrq      125.703 dm        yyy
tn         C13     dmm        W
at         1.215  dmf      8787.35
np         65536  dseq
sw         26963.3 dres      1.0
fb         15000  homo      n
bs         4      DEC2
tpwr       52    dfrq2     0
pw         10.2  dn2
d1         1.800 dpwr2     1
tof        144.5 dof2     0
nt         1000 dm2       n
ct         48   dmm2     c
alock      n     dmf2     10000
gain      not used dseq2
          FLAGS   dres2     1.0
          n       homo2     n
          in      DEC3
          dp      y       dfrq3     0
          hs     nn      dn3
          DISPLAY  dpwr3     1
          sp     -1480.6 dof3     0
          wp     26962.9 dm3      n
          vs     98     dmm3     c
          sc     0      dmf3     10000
          wc     250   dseq3
          hzmm   107.85 dres3     1.0
          is     500.00 homo3     n
          rfl    6447.1  PROCESSING
          rfp    4966.0  lb        1.00
          th     6      wtfile
          ins    100.000  proc      ft
          ai cdc ph     math     131072
          f
```

werr  
wexp  
wbs  
wnt

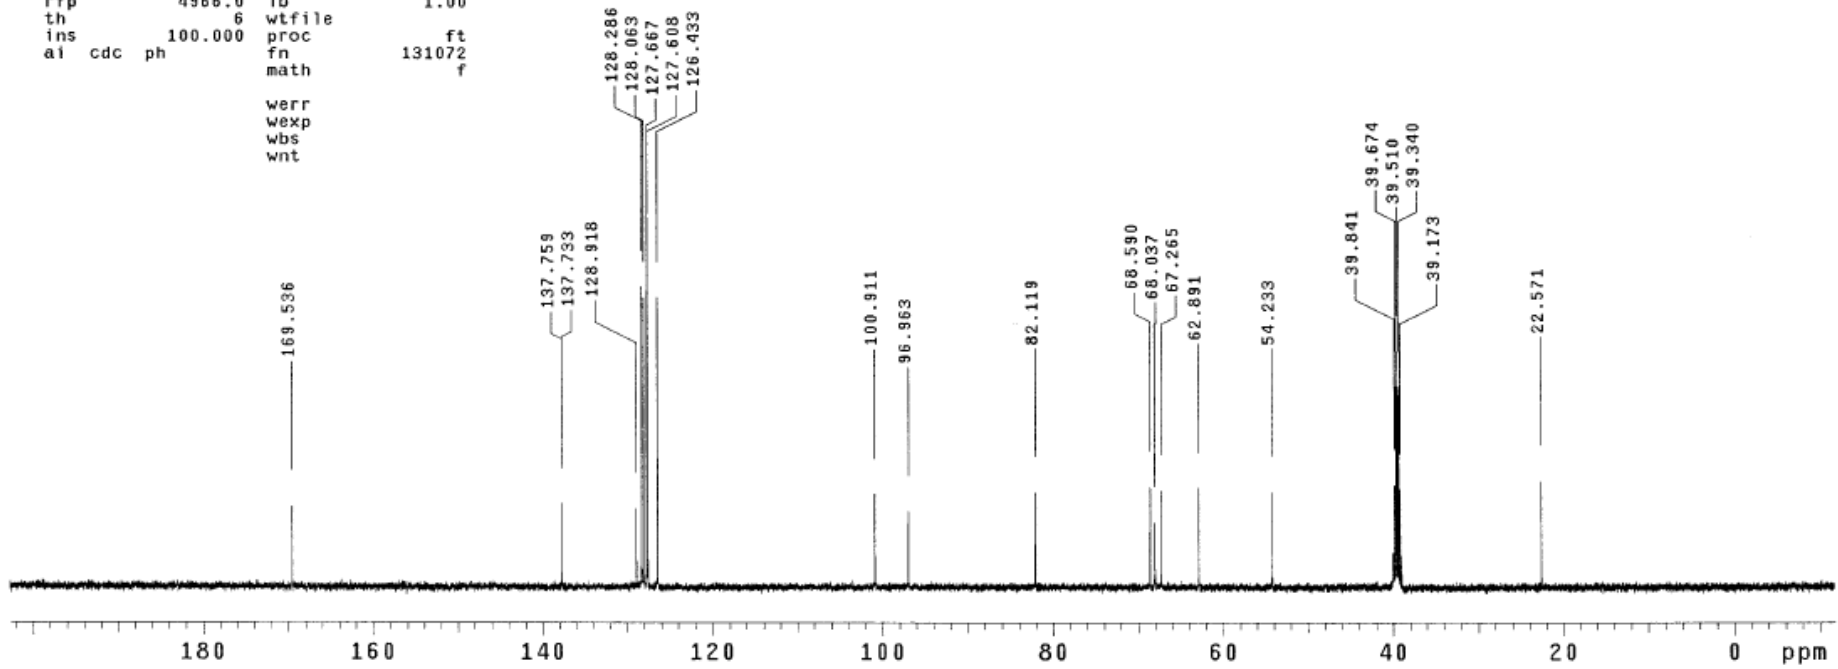



TY2-297

Pulse Sequence: relayh  
Solvent: DMSO  
Ambient temperature  
INOVA-500 "nmr2a.chem.nd.edu"

Relax. delay 1.300 sec  
COSY 90-90  
Acq. time 0.157 sec  
Width 6533.3 Hz  
2D Width 6533.3 Hz  
32 repetitions  
256 increments  
OBSERVE H1, 499.8635420 MHz  
DATA PROCESSING  
Sine bell 0.078 sec  
F1 DATA PROCESSING  
Sine bell 0.039 sec  
FT size 2048 x 2048  
Total time 3 hr, 23 min, 10 sec

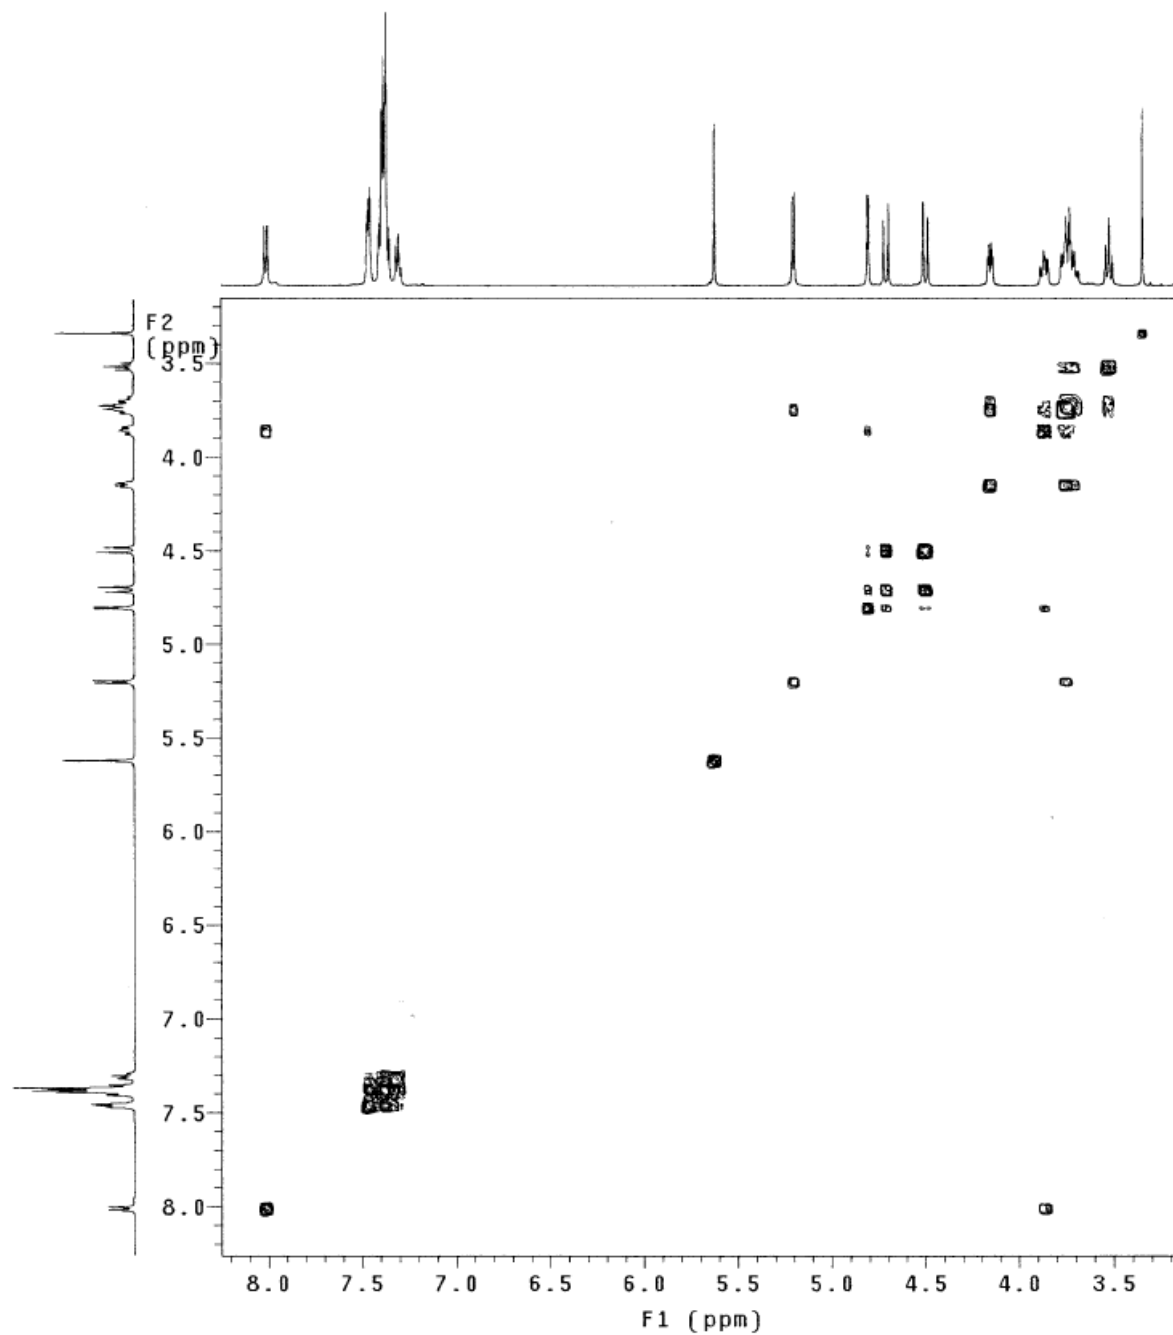

TY2-297

Pulse Sequence: relayh

Solvent: DMSO  
Ambient temperature  
INOVA-500 "nmr2a.chem.nd.edu"

Relax. delay 1.300 sec  
COSY 90-90  
Acq. time 0.157 sec  
Width 6533.3 Hz  
2D Width 6533.3 Hz  
32 repetitions  
256 increments

OBSERVE H1, 499.8635420 MHz  
DATA PROCESSING  
Sine bell 0.078 sec  
F1 DATA PROCESSING  
Sine bell 0.039 sec  
FT size 2048 x 2048  
Total time 3 hr, 23 min, 10 sec

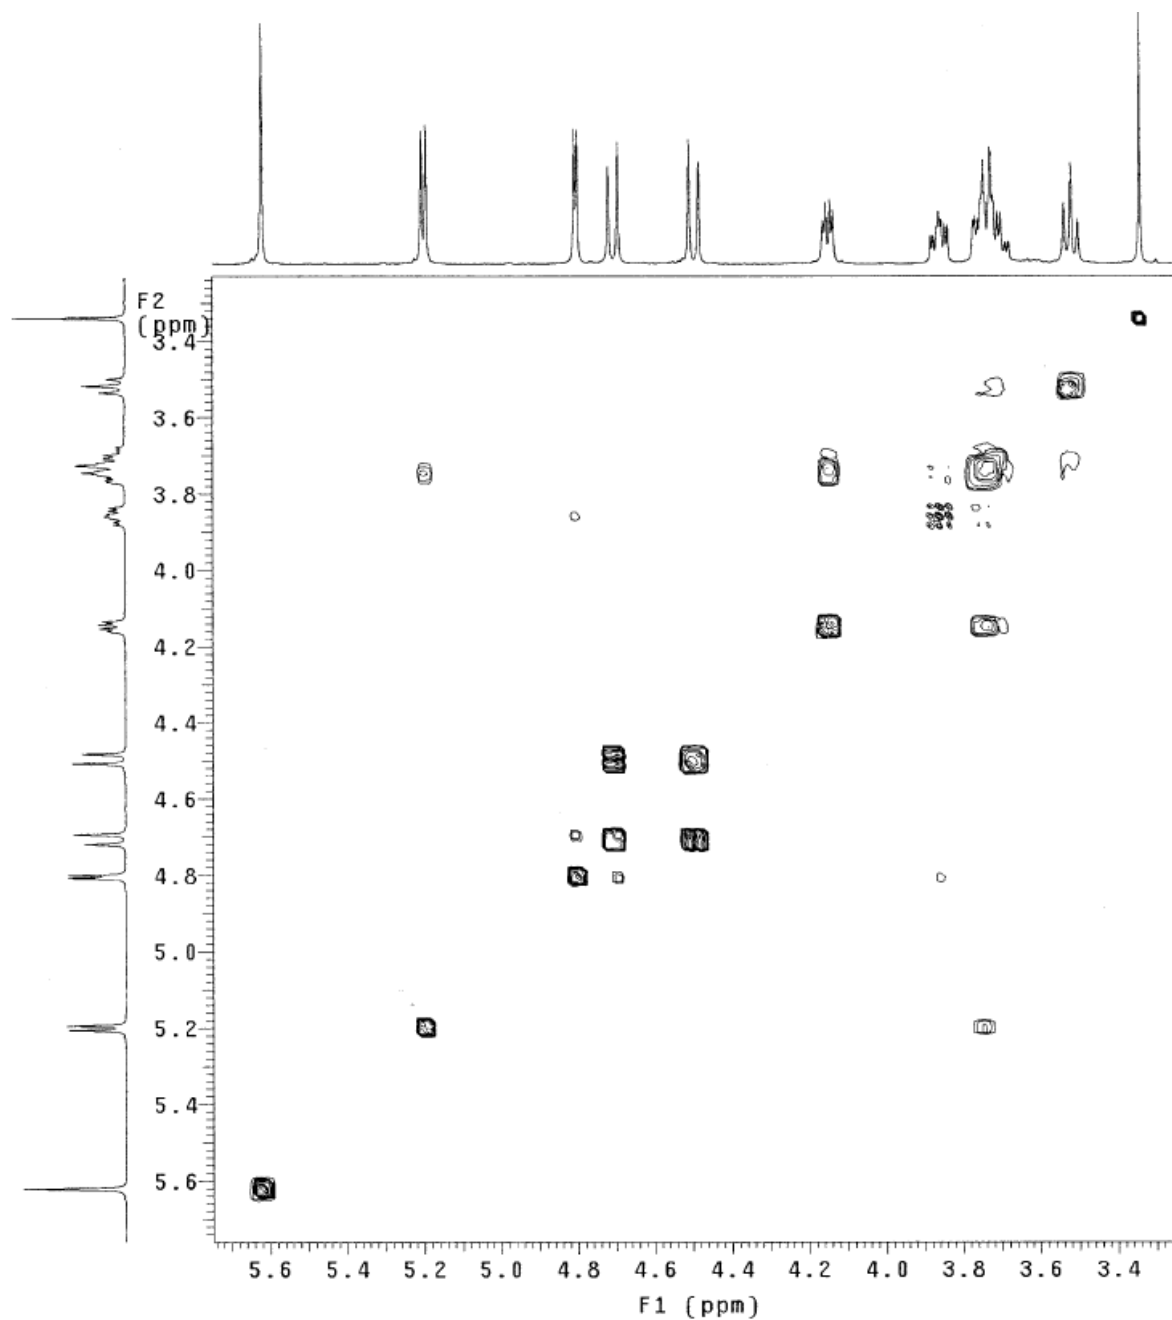

TY2-297

Pulse Sequence: hetcor

Solvent: DMSO  
Ambient temperature  
User: 1-14-87  
INOVA-500 "nmr2a.chem.nd.edu"

Relax. delay 1.500 sec  
Acq. time 0.111 sec  
Width 18403.5 Hz  
2D Width 6533.3 Hz  
32 repetitions  
256 increments  
OBSERVE C13, 125.6908422 MHz  
DECOUPLE H1, 499.8663056 MHz  
Power 40 dB  
on during acquisition  
off during delay  
WALTZ-16 modulated  
DATA PROCESSING  
Line broadening 1.0 Hz  
F1 DATA PROCESSING  
Line broadening 0.3 Hz  
FT size 4096 x 1024  
Total time 3 hr, 46 min, 5 sec

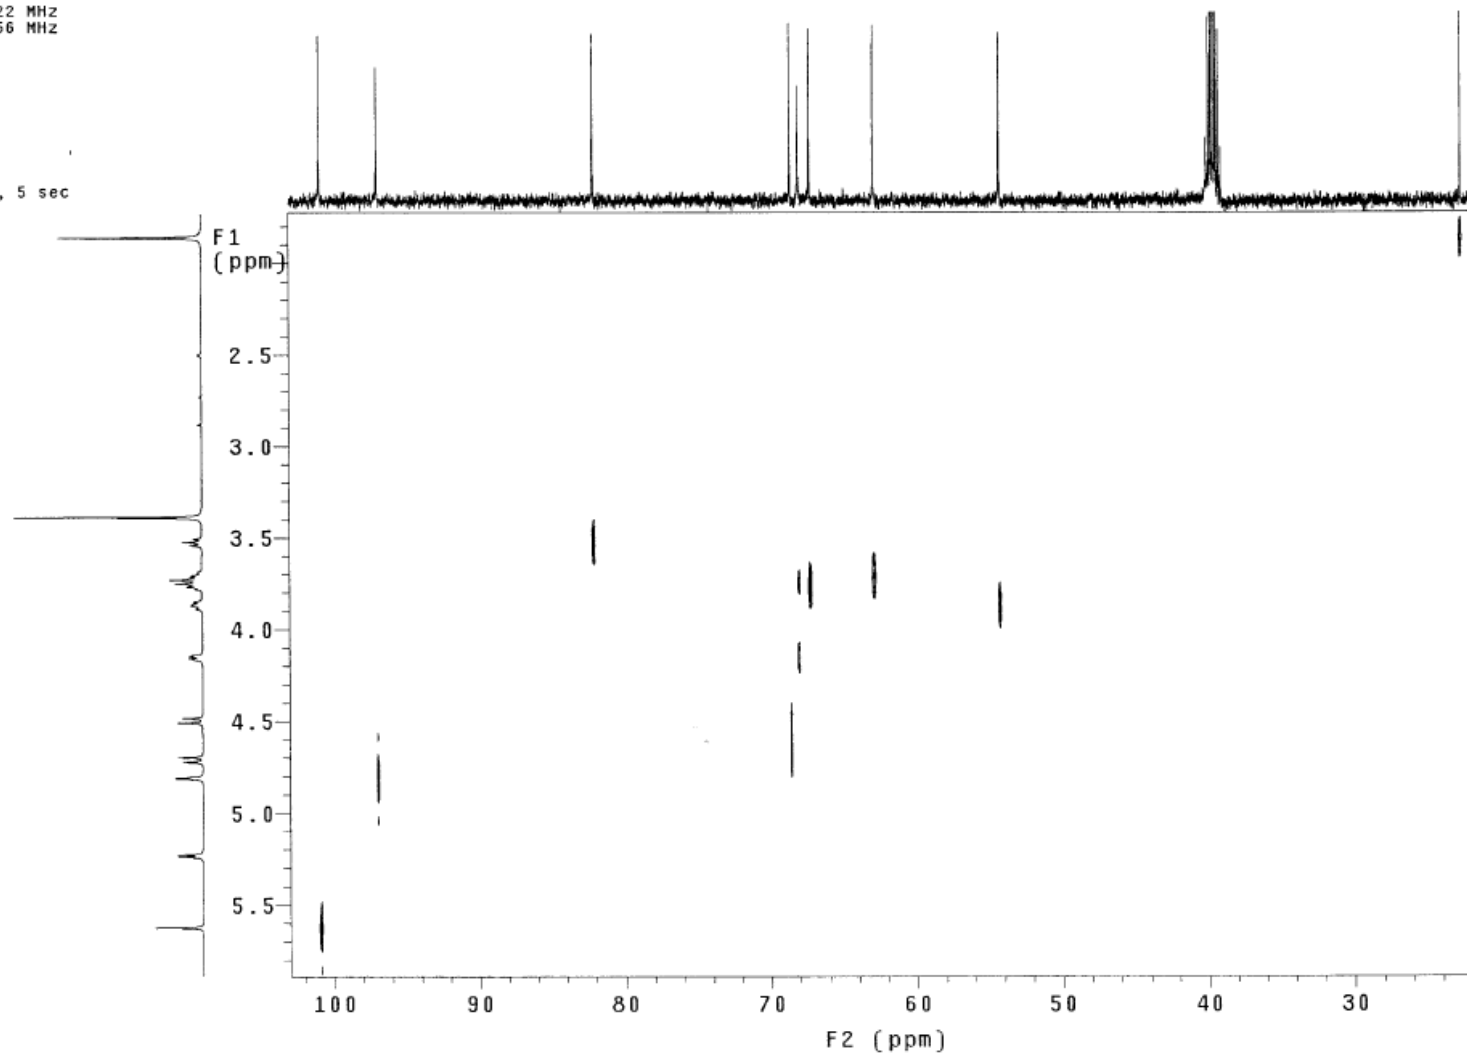

CH3 carbons

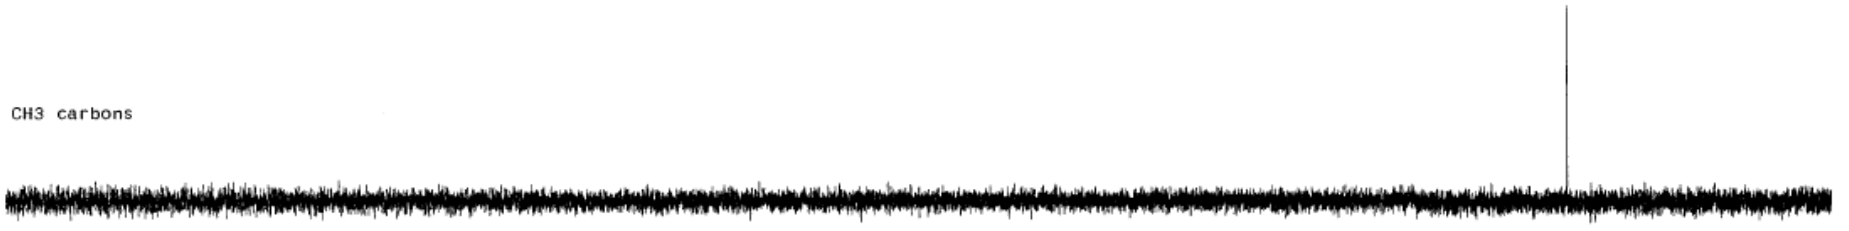

CH2 carbons

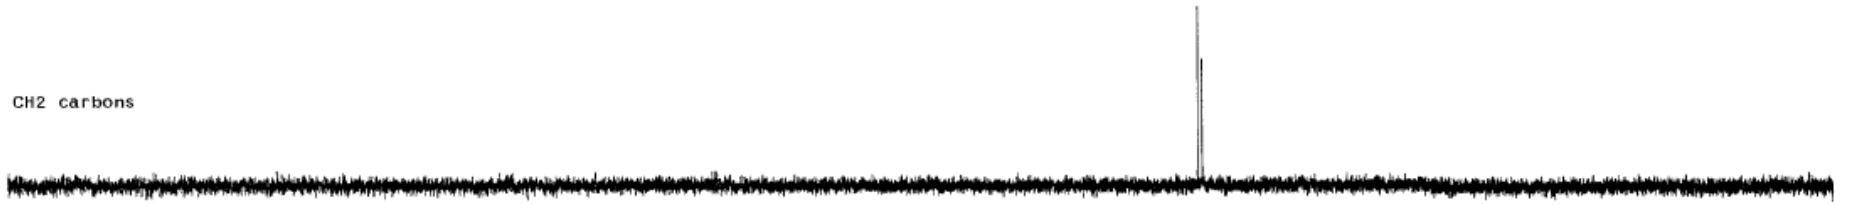

CH carbons

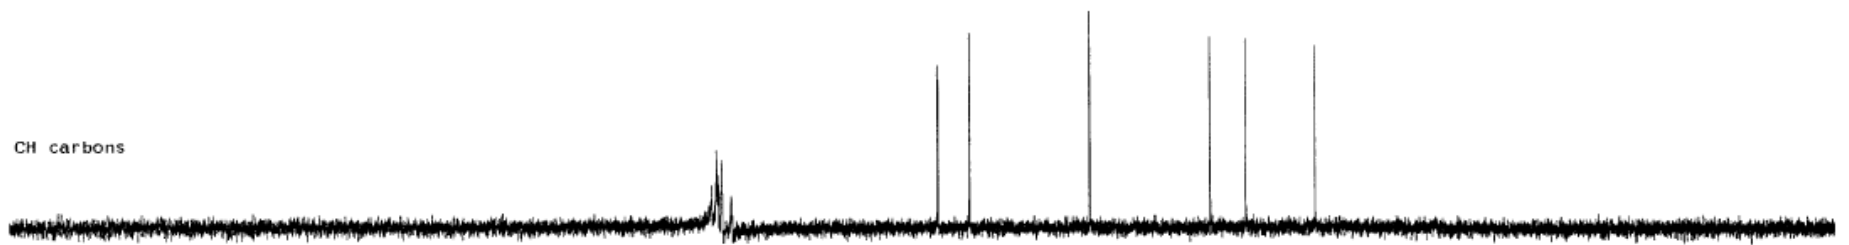

all protonated carbons

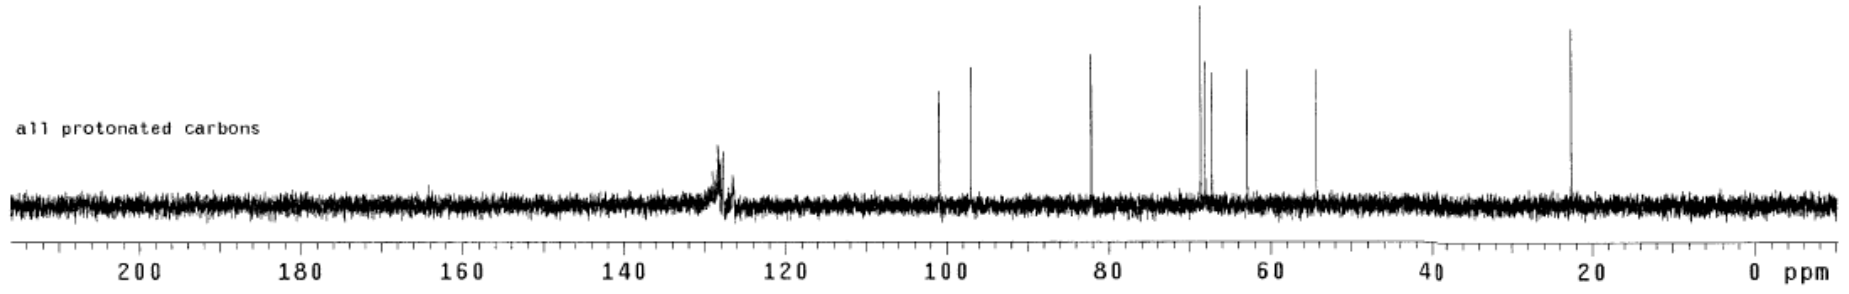

200 180 160 140 120 100 80 60 40 20 0 ppm

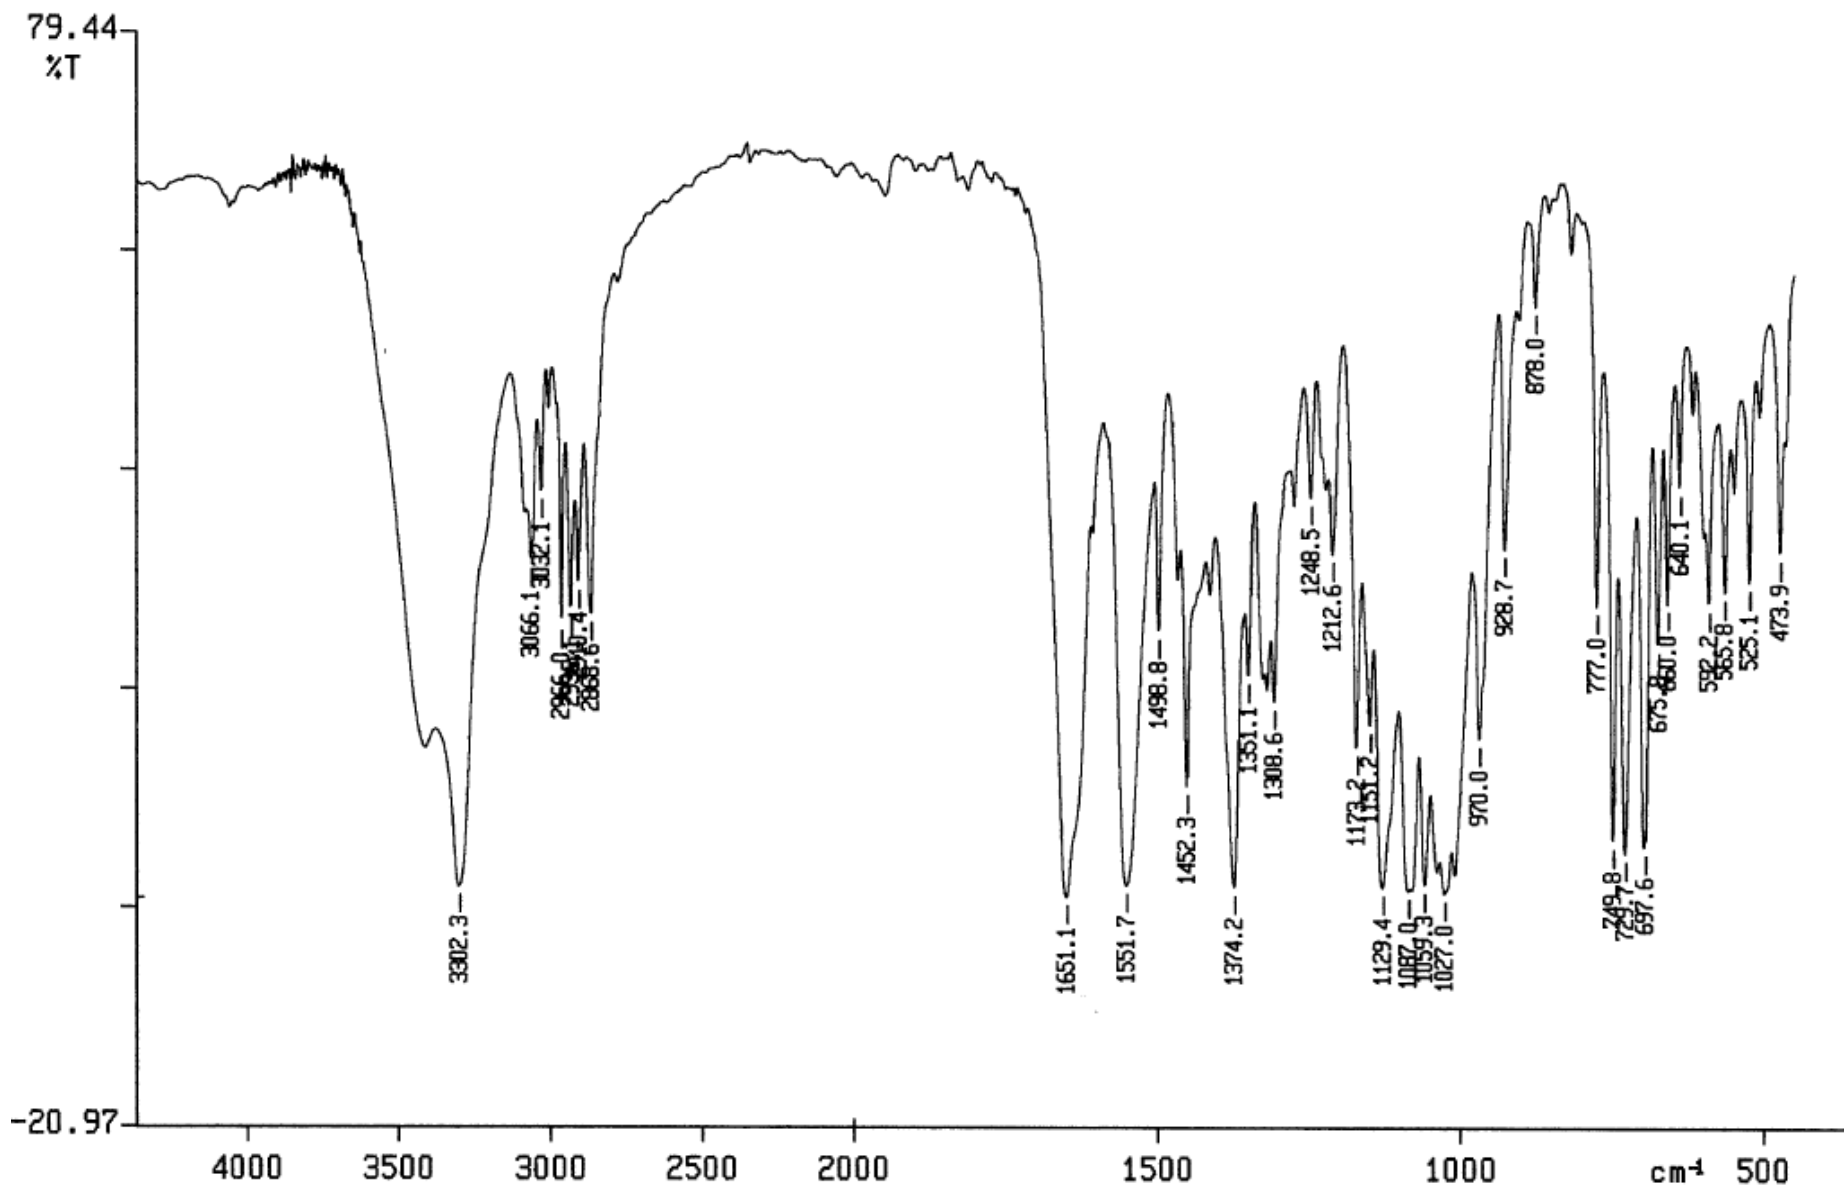

TY2-194

exp1 s2pu1

```
SAMPLE          DEC. & VT
date   Oct 16 2008  dfrq          499.864
solvent CDC13      dn            H1
file   exp        dpwr          30
ACQUISITION      dof            0
sfrq   499.864   dm            nnn
tn     H1        dmm            c
at     5.016     dmf            200
np     65536     dseq           dres
sw     6533.3    dres           1.0
fb     4000     homo            n
bs     4         DEC2          0
tpwr   61       dfrq2         dn2
pw     13.5     dn2            1
d1     0.100    dpwr2         dof2
tof    269.9    dof2           0
nt     4        dm2            n
ct     4        dmm2           c
alock  n        dmf2          200
gain   not used dseq2         dres2
        FLAGS    dres2         1.0
        n        homo2        n
in     n        DEC3          0
dp     y        dn3            1
hs     nn       dpwr3         dof3
        DISPLAY  dof3           0
sp    -111.4    dm3            n
wp    5116.5   dmm3           c
vs    25       dmf3          200
sc    0        dseq3         dres3
wc    250     dres3         1.0
hzmm  20.47   homo3          n
is    400.00  PROCESSING
rfl   4140.3  wtfile
rfp   3634.0  proc          ft
th    7       fn            65536
ins   3.000  math          f
ai    ph
        werr
        wexp  process pH
        wbs
        wnt   wft
```

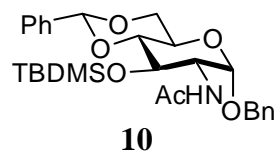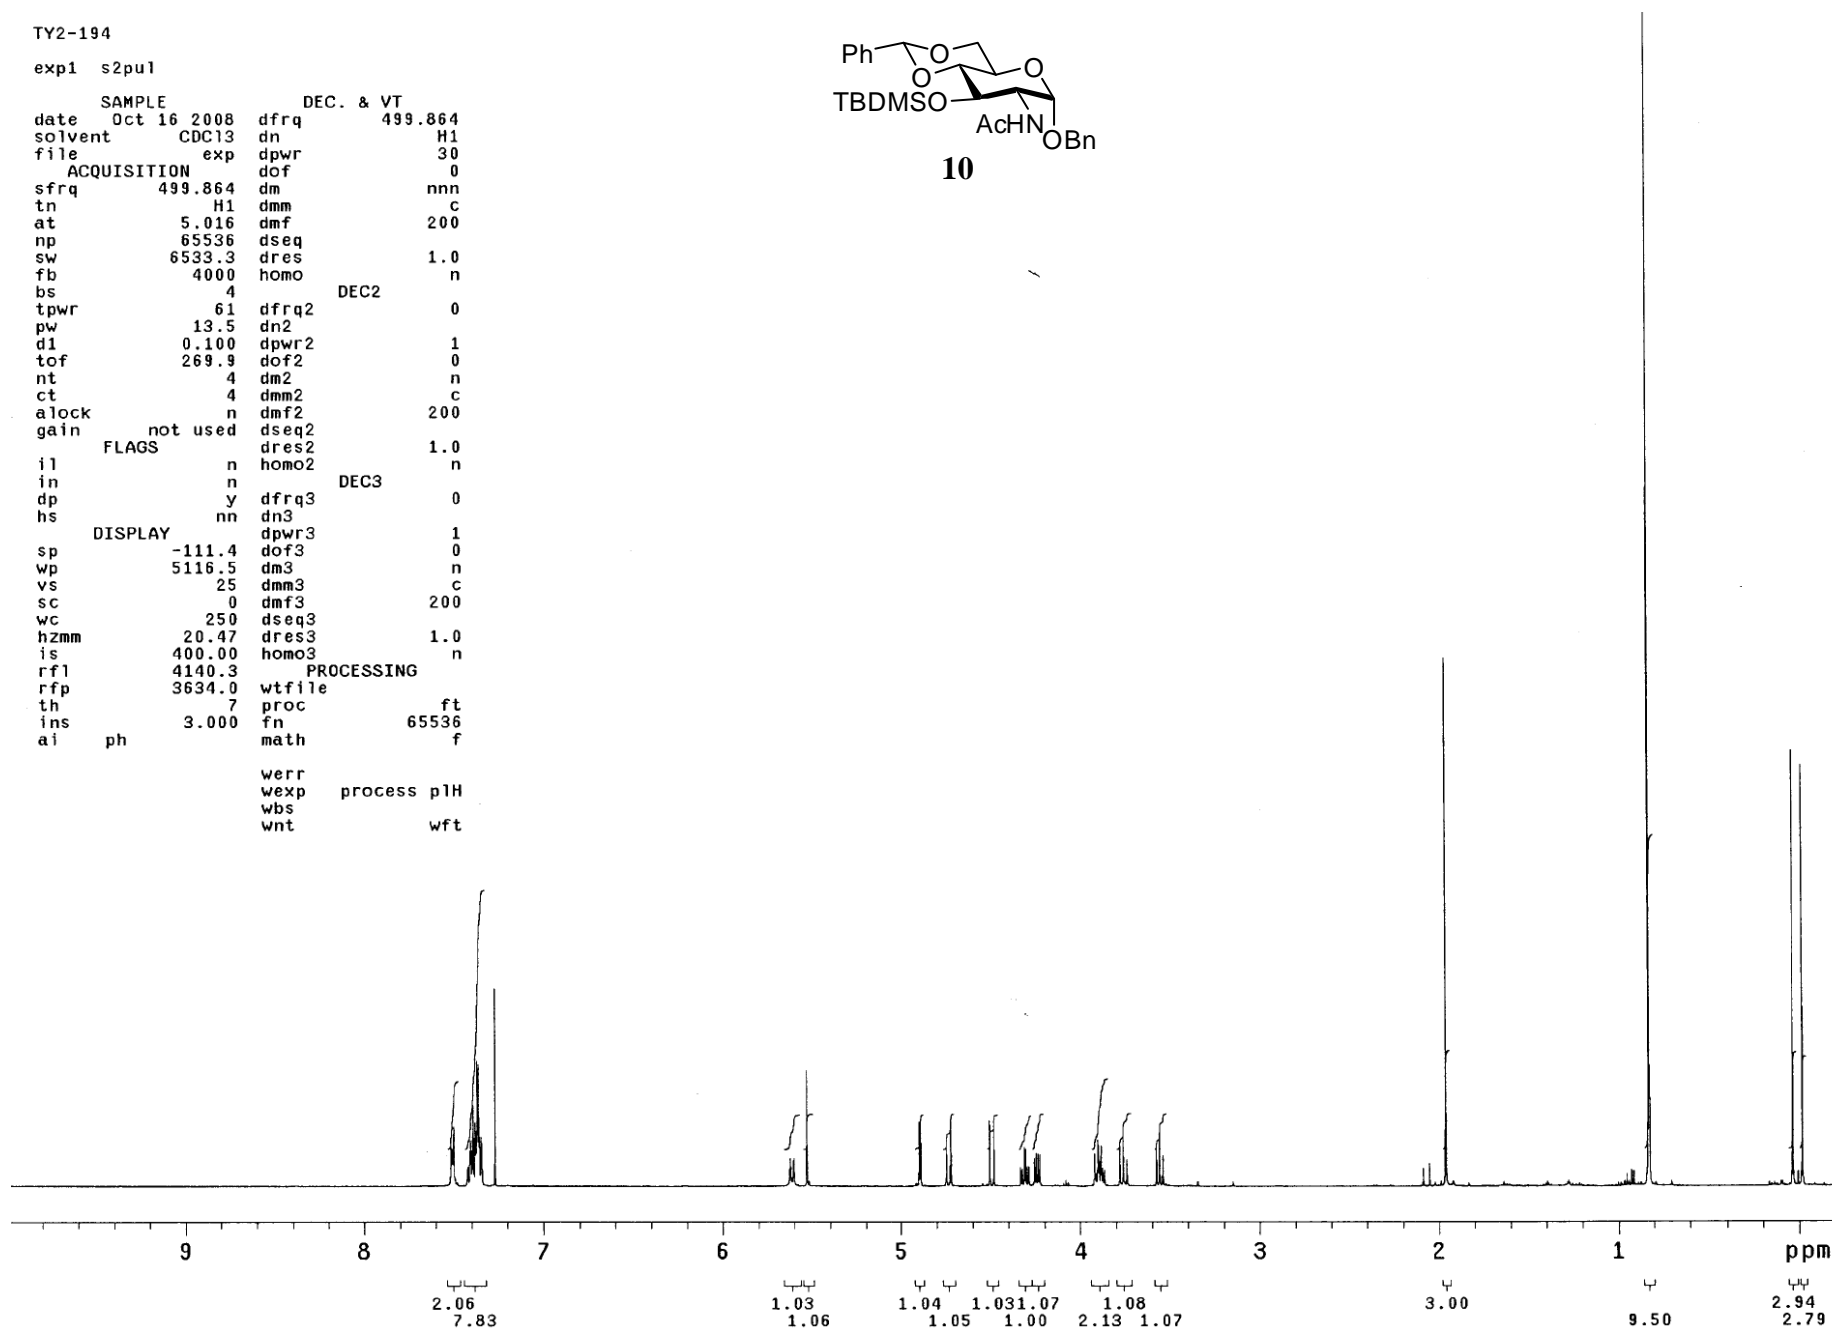

TY2-194

exp2 s2pu1

```
SAMPLE          DEC. & VT
date Oct 16 2008 dfrq      499.864
solvent CDC13     dn        H1
file exp         dpwr      40
ACQUISITION
sfrq 125.702     dm         yyy
tn    C13        dmm        w
at    1.215     dmf        8787.35
np    65536     dseq
sw    26963.3   dres      1.0
fb    15000     homo
bs    4         DEC2
tpwr  52        dfrq2     0
pw    10.2      dn2
d1    1.800     dpwr2     1
tof   144.5    dof2      0
nt    1000     dm2       n
ct    399      dmm2      c
alock n         dmf2     10000
gain  not used dseq2
FLAGS n         homo2    1.0
in    n         DEC3
dp    y         dfrq3    0
hs    nn        dn3
DISPLAY
sp    -1412.2   dof3     0
wp    26962.9  dm3      n
vs    24       dmm3     10000
sc    0        dmf3
wc    250     dseq3
hzmm  107.85  dres3    1.0
is    500.00  homo3    n
rfl   11119.6 PROCESSING
rfp   9707.1  lb       not used
th    8        wtfile
ins   100.000 proc      ft
ai cdc ph     fn      131072
math         f
werr
wexp
wbs
wnt
```

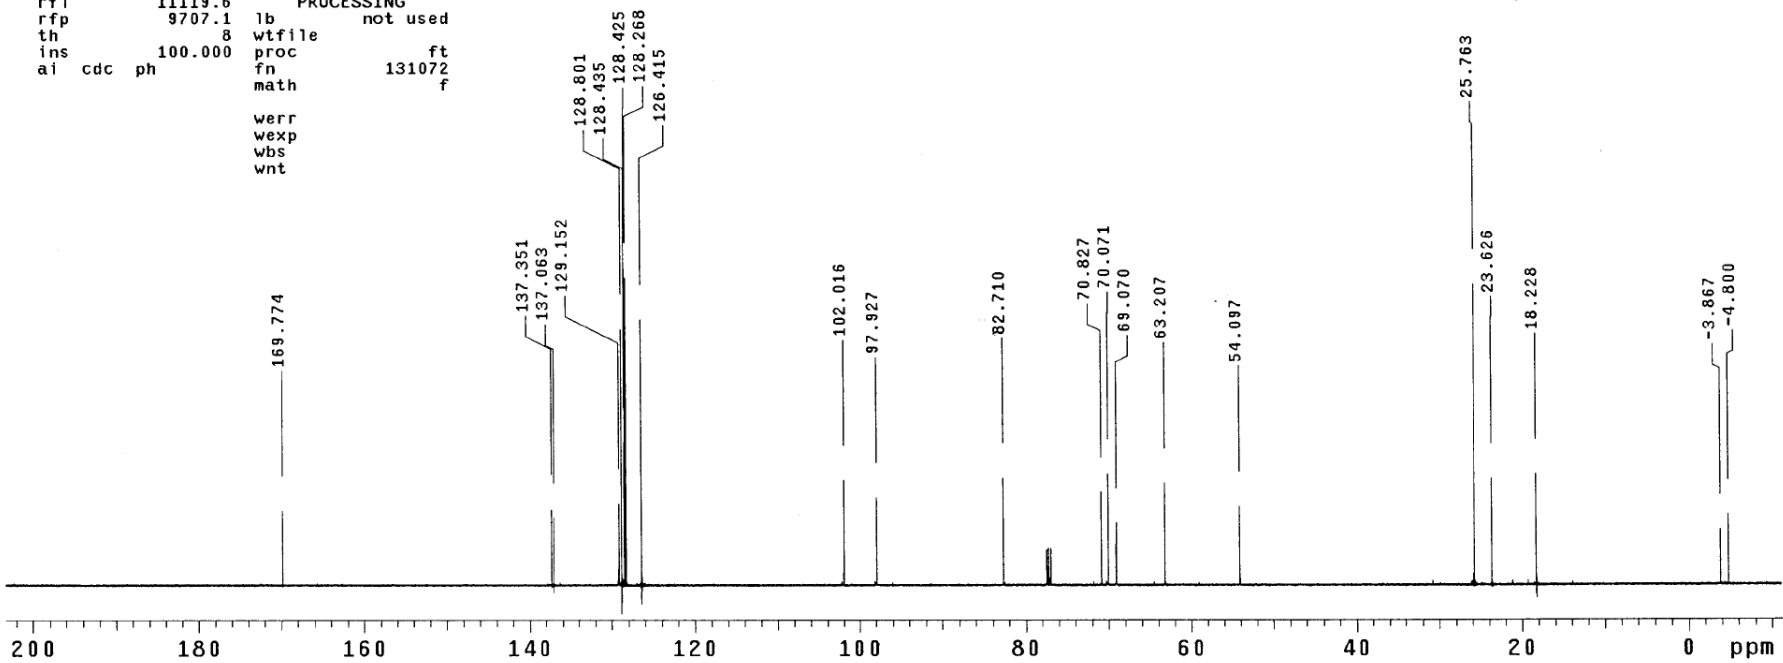

TY2-194

Pulse Sequence: relayh

Solvent: CDC13

Ambient temperature

INNOVA-500 "nmr2a.chem.nd.edu"

Relax. delay 1.300 sec

COSY 90-90

Acq. time 0.157 sec

Width 6533.3 Hz

2D Width 6533.3 Hz

16 repetitions

256 increments

OBSERVE H1, 499.8611709 MHz

DATA PROCESSING

Sine bell 0.078 sec

F1 DATA PROCESSING

Sine bell 0.039 sec

FT size 2048 x 2048

Total time 1 hr, 41 min, 40 sec

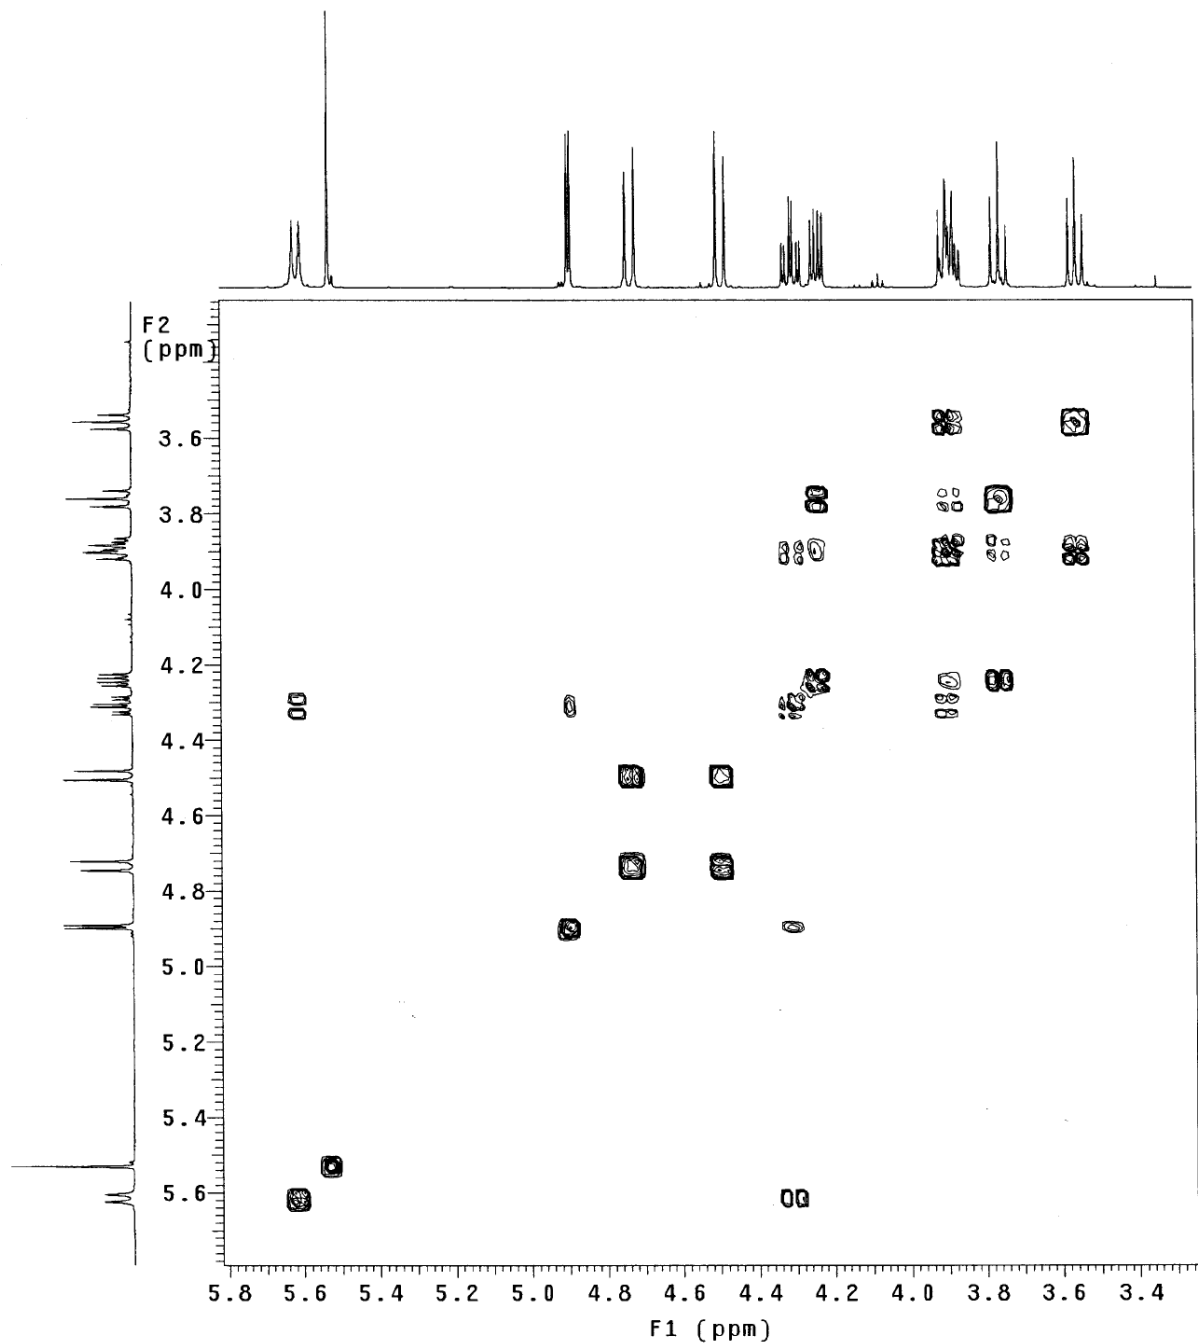



TY2-194

Pulse Sequence: hetcor

Solvent: CDC13

Ambient temperature

User: 1-14-87

INOVA-500 "nmr2a.chem.nd.edu"

Relax. delay 1.500 sec

Acq. time 0.111 sec

Width 18403.5 Hz

2D Width 6533.3 Hz

32 repetitions

256 increments

OBSERVE C13, 125.6901767 MHz

DECOUPLE H1, 499.8639312 MHz

Power 40 dB

on during acquisition

off during delay

WALTZ-16 modulated

DATA PROCESSING

Line broadening 1.0 Hz

F1 DATA PROCESSING

Line broadening 0.3 Hz

FT size 4096 x 1024

Total time 3 hr, 46 min, 5 sec

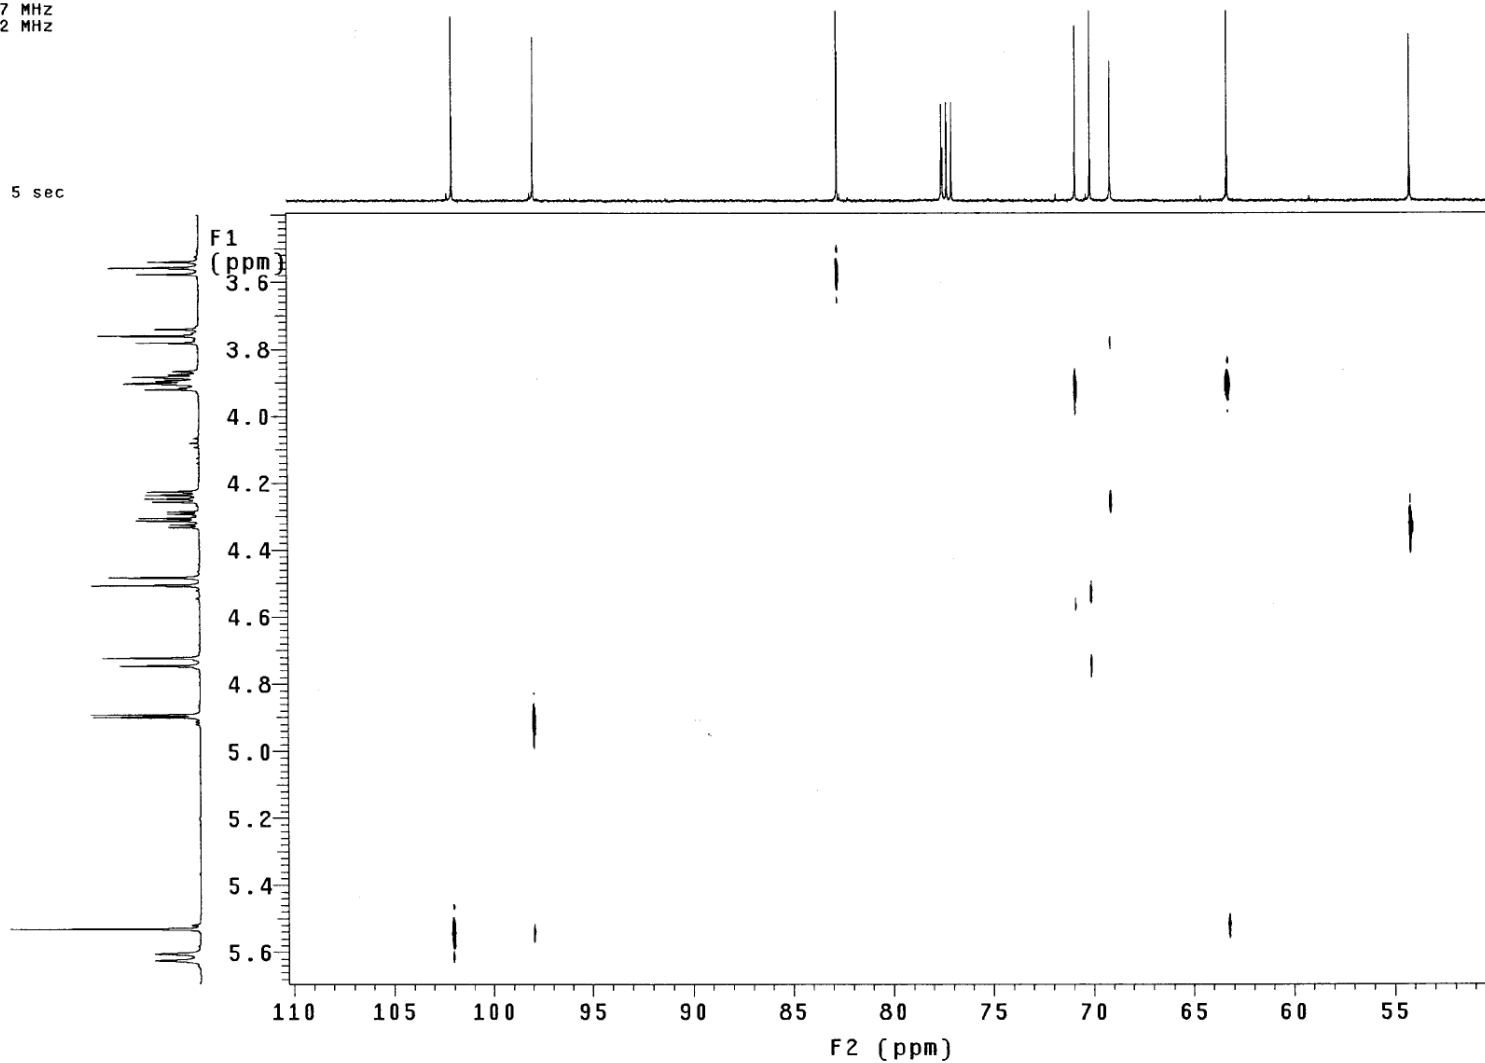

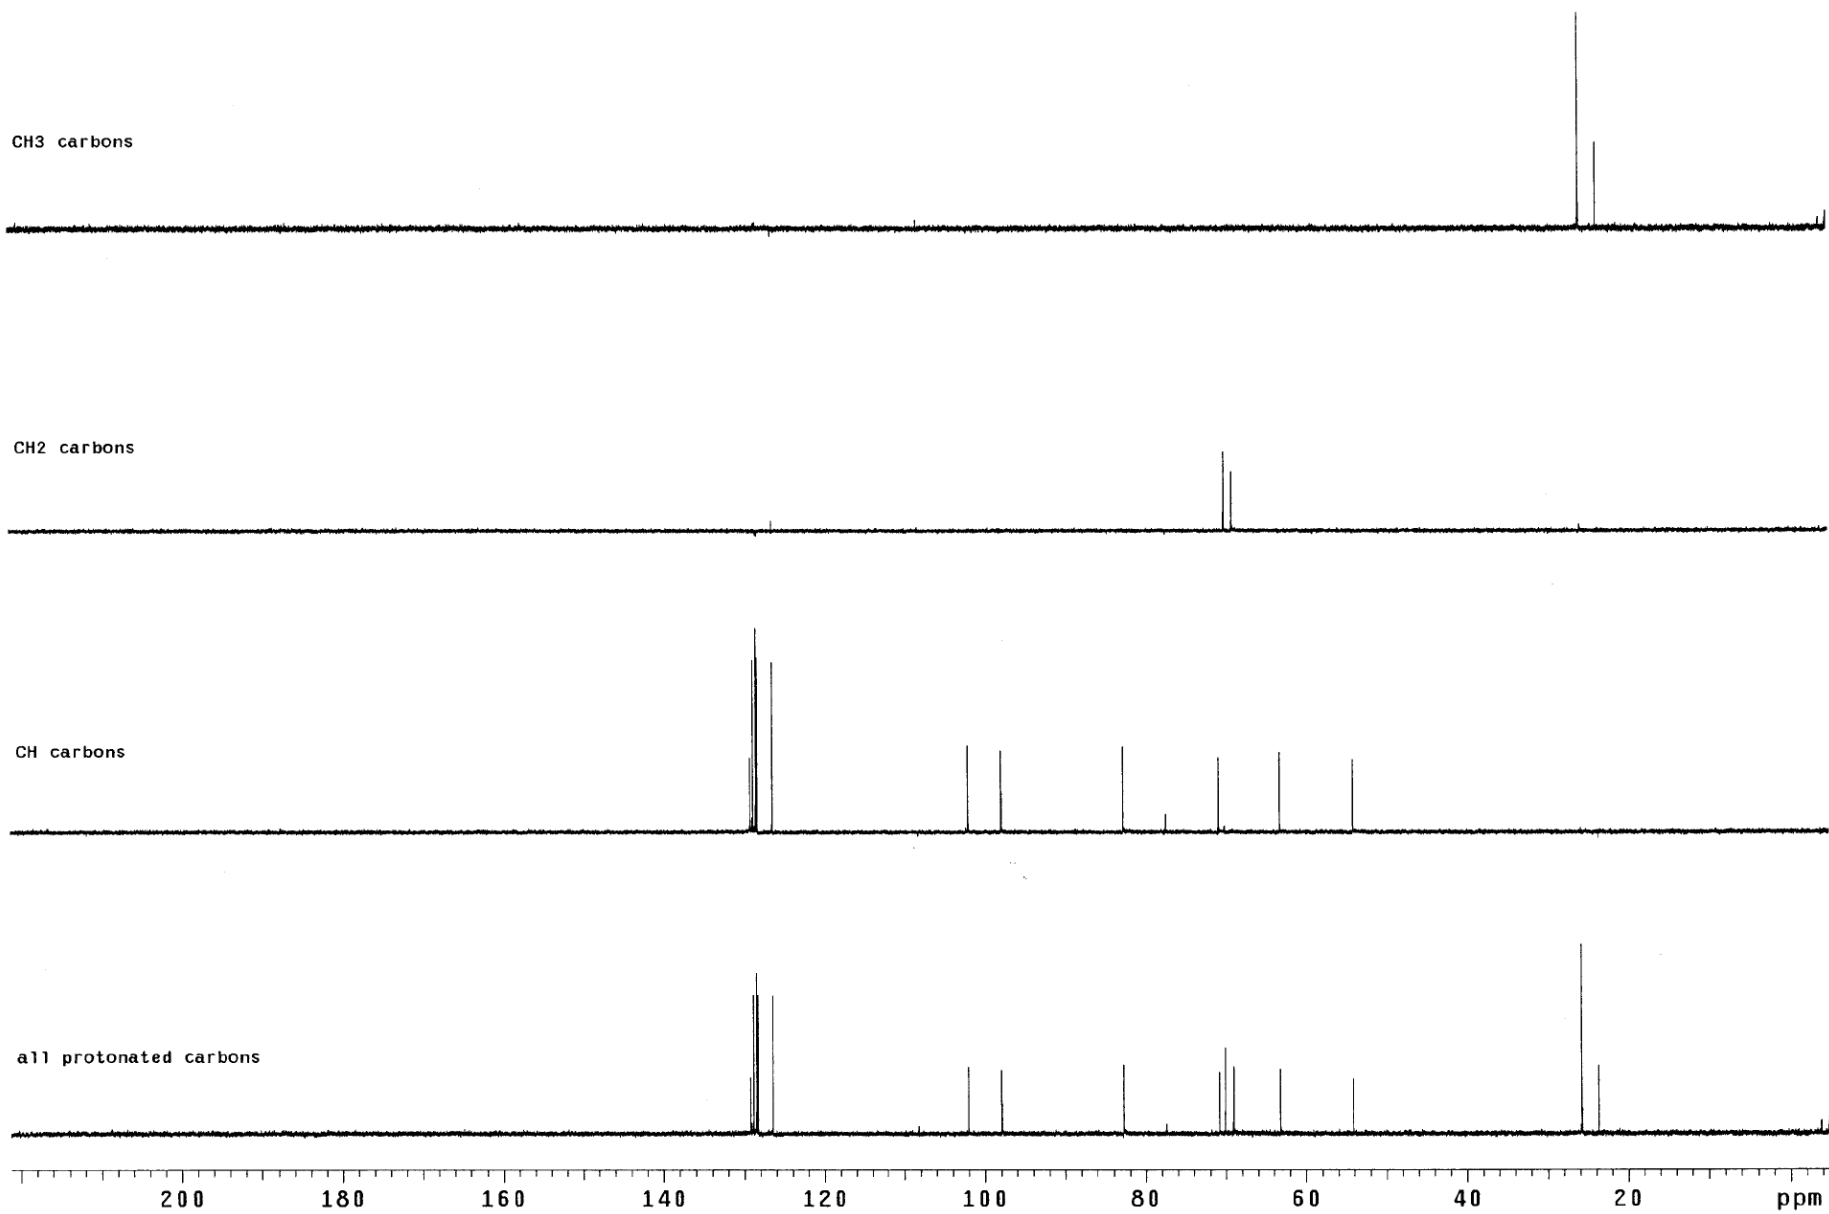

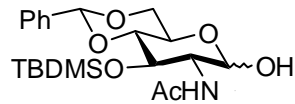

11

TY2-175

exp1 s2pu1

|             |            |            |             |
|-------------|------------|------------|-------------|
| SAMPLE      |            | DEC. & VT  |             |
| date        | Oct 5 2008 | dfrq       | 499.864     |
| solvent     | CDC13      | dn         | H1          |
| file        | exp        | dpwr       | 30          |
| ACQUISITION |            | dof        | 0           |
| sfrq        | 499.864    | dm         | nnn         |
| tn          | H1         | dmm        | c           |
| at          | 5.016      | dmf        | 200         |
| np          | 65536      | dseq       |             |
| sw          | 6533.3     | dres       | 1.0         |
| fb          | 4000       | homo       | n           |
| bs          | 4          | DEC2       |             |
| tpwr        | 61         | dfrq2      | 0           |
| pw          | 13.5       | dn2        |             |
| d1          | 0.100      | dpwr2      | 1           |
| tof         | 269.9      | dof2       | 0           |
| nt          | 16         | dm2        | n           |
| ct          | 16         | dmm2       | c           |
| alock       |            | dmf2       | 200         |
| gain        | not used   | dseq2      |             |
| FLAGS       |            | dres2      | 1.0         |
| il          | n          | homo2      | n           |
| in          | n          | DEC3       |             |
| dp          | y          | dfrq3      | 0           |
| hs          | nn         | dn3        |             |
| DISPLAY     |            | dpwr3      | 1           |
| sp          | -184.7     | dof3       | 0           |
| wp          | 5185.1     | dm3        | n           |
| vs          | 50         | dmm3       | c           |
| sc          | 0          | dmf3       | 200         |
| wc          | 250        | dseq3      |             |
| hzmm        | 20.74      | dres3      | 1.0         |
| is          | 412.79     | homo3      | n           |
| rfl         | 4179.4     | PROCESSING |             |
| rfp         | 3634.0     | wfile      |             |
| th          | 7          | proc       | ft          |
| ins         | 9.000      | fn         | 65536       |
| ai          | ph         | math       | f           |
|             |            | werr       |             |
|             |            | wexp       | process p1H |
|             |            | wbs        |             |
|             |            | wnt        | wft         |

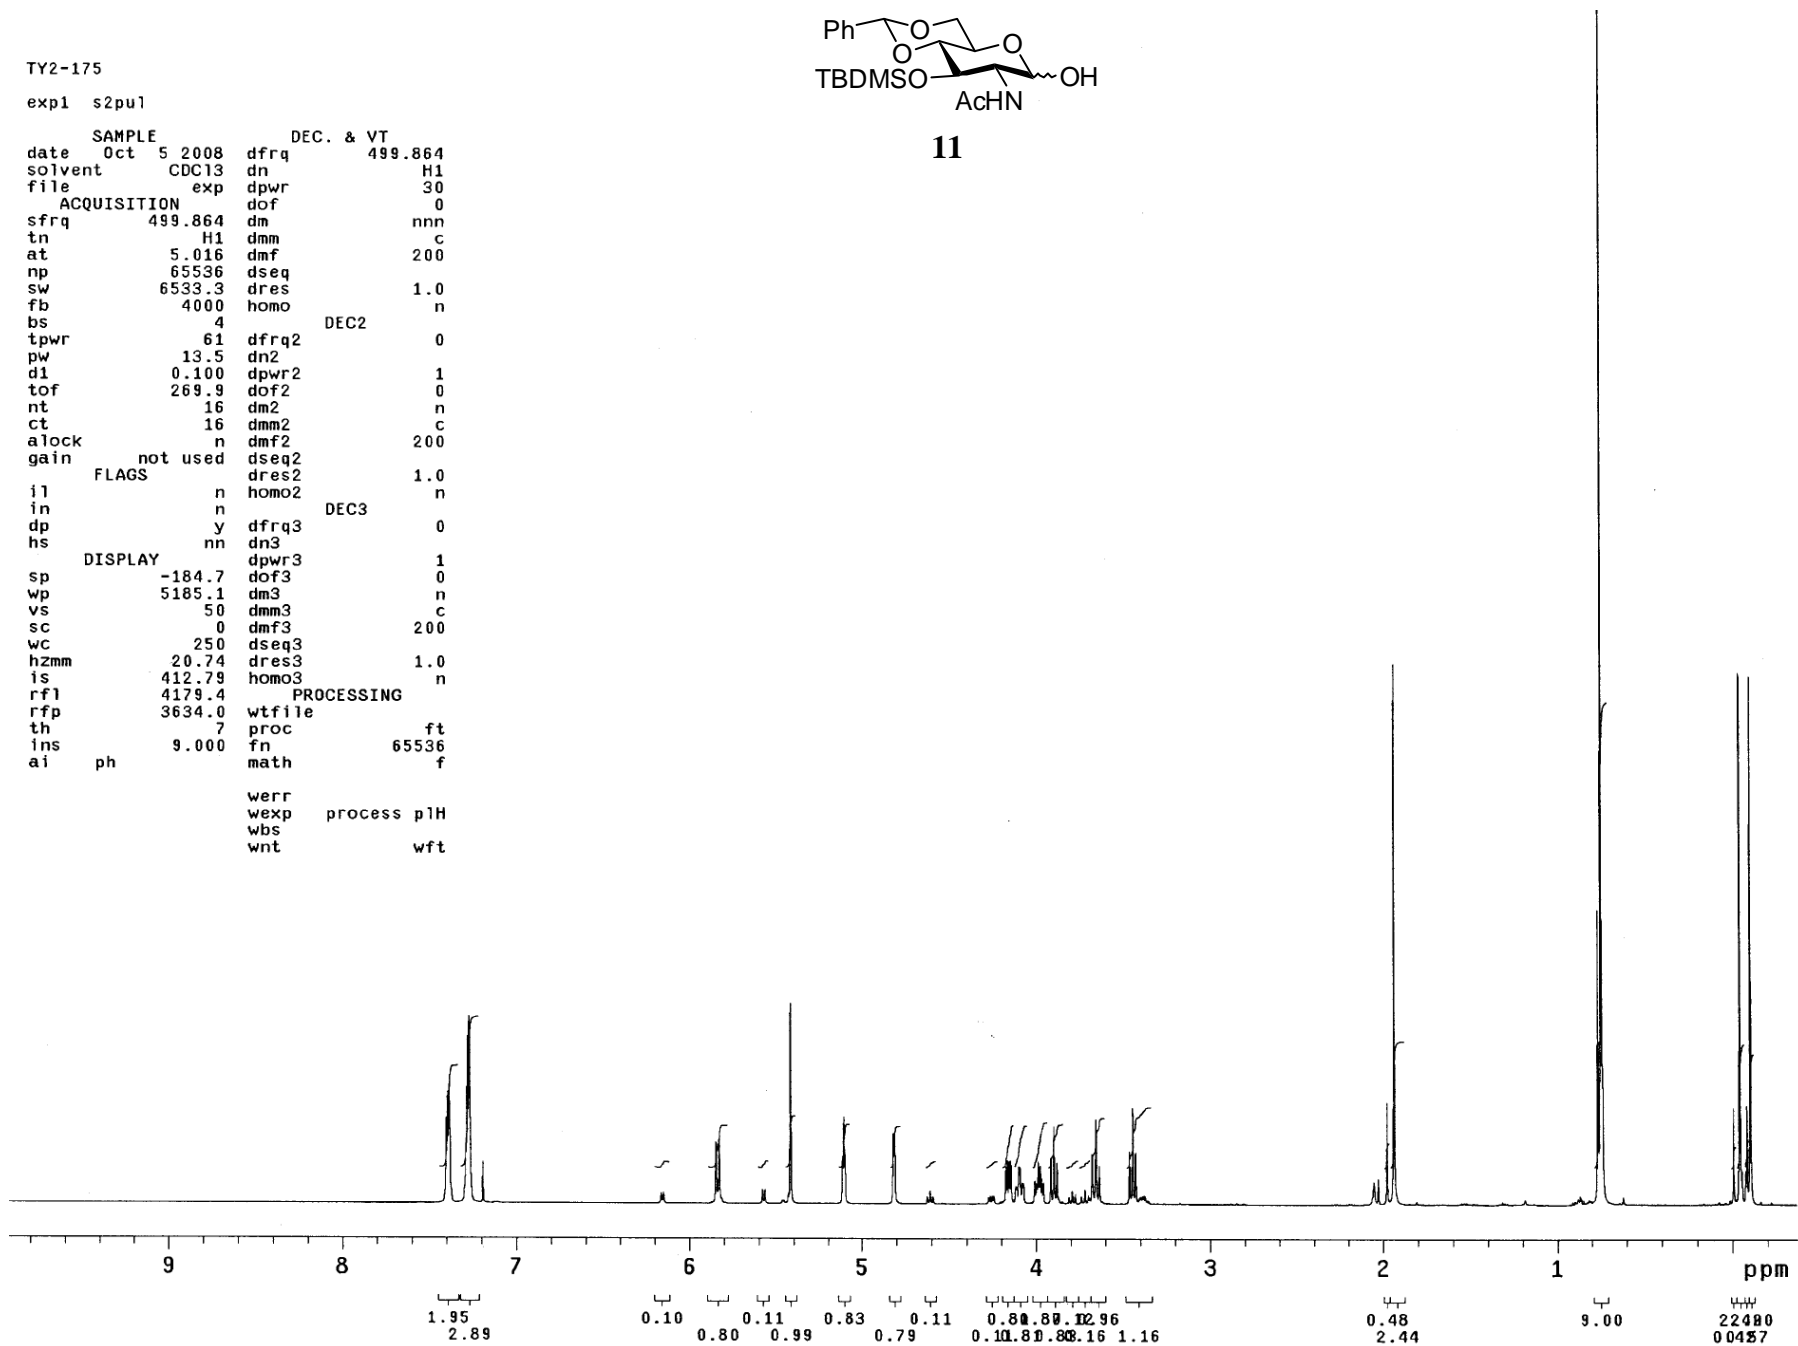

TY2-175

exp2 s2pu1

```
SAMPLE          DEC. & VT
date Oct 5 2008 dfrq      499.864
solvent CDC13      dn       H1
file exp'         dpwr     40
ACQUISITION     dof      0
sfrq 125.702     dm       yyy
tn C13           dmm      w
at 1.215         dmf     8787.35
np 65536         dseq
sw 26963.3       dres    1.0
fb 15000         homo    n
bs 4             DEC2
tpwr 52          dfrq2   0
pw 10.2          dn2
d1 1.800         dpwr2   1
tof 144.5        dof2    0
nt 3000         dm2     n
ct 1296         dmm2    c
alock          n      dmf2    10000
gain not used    dseq2
FLAGS          dres2    1.0
              homo2   n
              DEC3
il n            dfrq3   0
in n            dn3
dp y            dpwr3   1
hs nn          dof3    0
DISPLAY       dm3     n
sp -1406.4      dmm3    c
wp 26962.9     dmf3    10000
vs 666         dseq3
sc 0           dres3    1.0
wc 250         homo3   n
hzmm 107.85    PROCESSING
is 500.00     lb      not used
rfl 11113.9    wtfile
rfp 9707.1     proc
th 3          fn      131072
ins 100.000   math
ai cdc ph     werr
              wexp
              wbs
              wnt
```

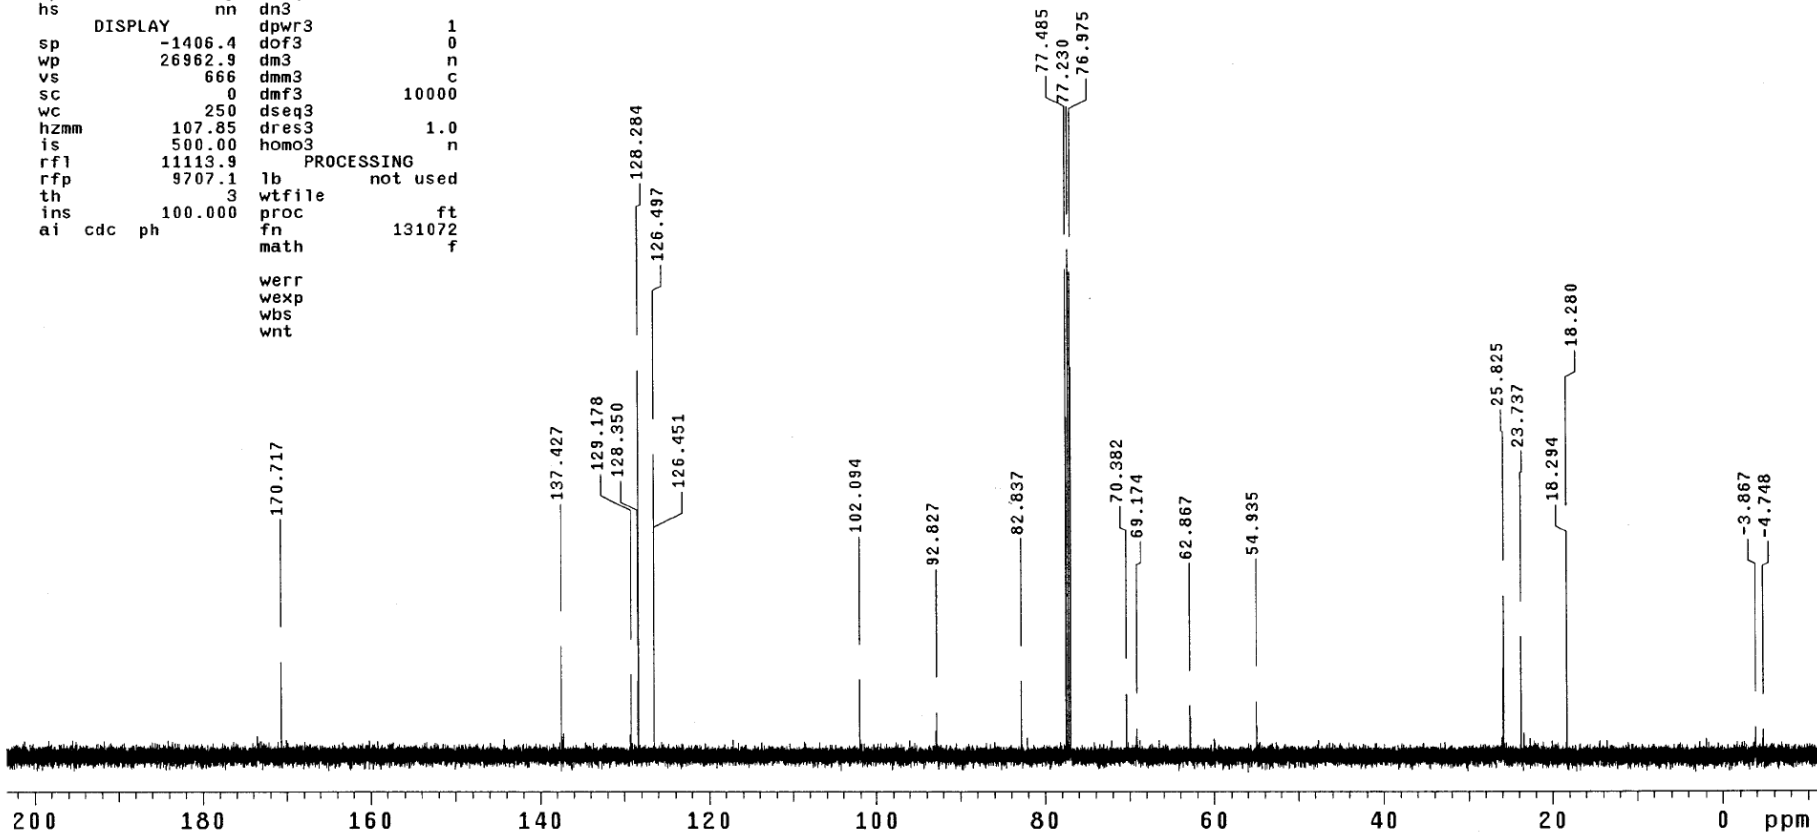

TY2-175

Pulse Sequence: relayh

Solvent: CDCl3  
Ambient temperature  
INOVA-500 "nmr2a.chem.nd.edu"

Relax. delay 1.300 sec  
COSY 90-90  
Acq. time 0.157 sec  
Width 6533.3 Hz  
2D Width 6533.3 Hz  
8 repetitions  
256 increments  
OBSERVE H1, 499.8612100 MHz  
DATA PROCESSING  
Sine bell 0.078 sec  
F1 DATA PROCESSING  
Sine bell 0.039 sec  
FT size 2048 x 2048  
Total time 50 min, 56 sec

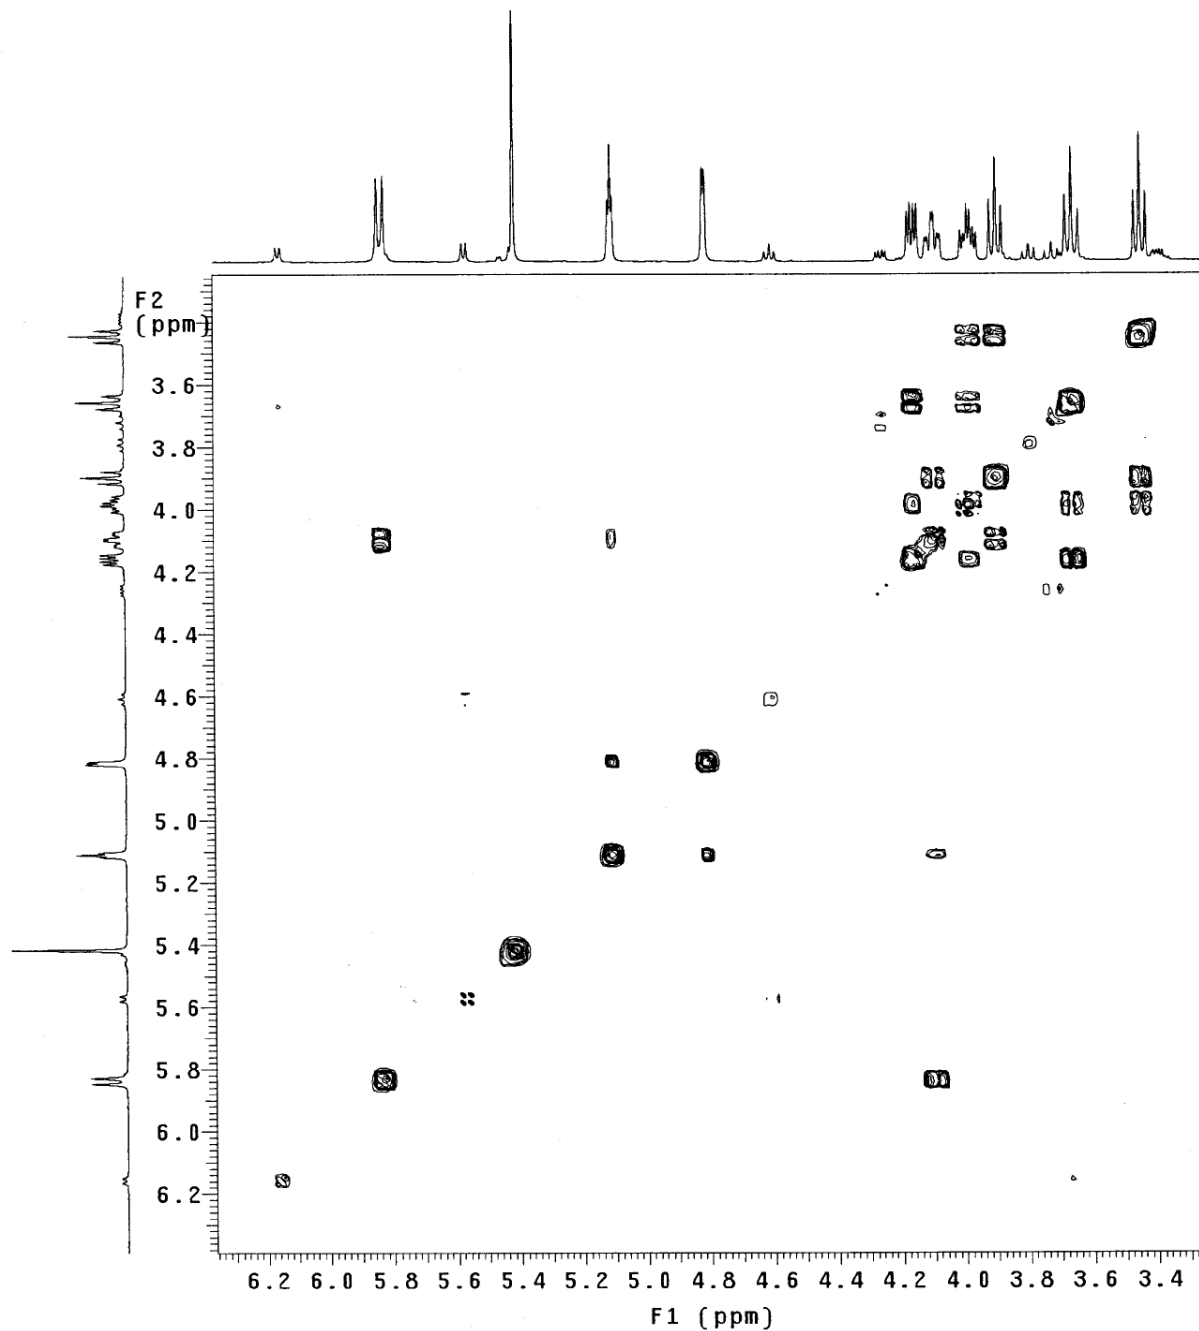

TY2-175

Pulse Sequence: relayh  
Solvent: CDC13  
Ambient temperature  
INOVA-500 "nmr2a.chem.nd.edu"

Relax. delay 1.300 sec  
COSY 90-90  
Acq. time 0.157 sec  
Width 6533.3 Hz  
2D Width 6533.3 Hz  
8 repetitions  
256 increments  
OBSERVE H1, 499.8612100 MHz  
DATA PROCESSING  
Sine bell 0.078 sec  
F1 DATA PROCESSING  
Sine bell 0.039 sec  
FT size 2048 x 2048  
Total time 50 min, 56 sec

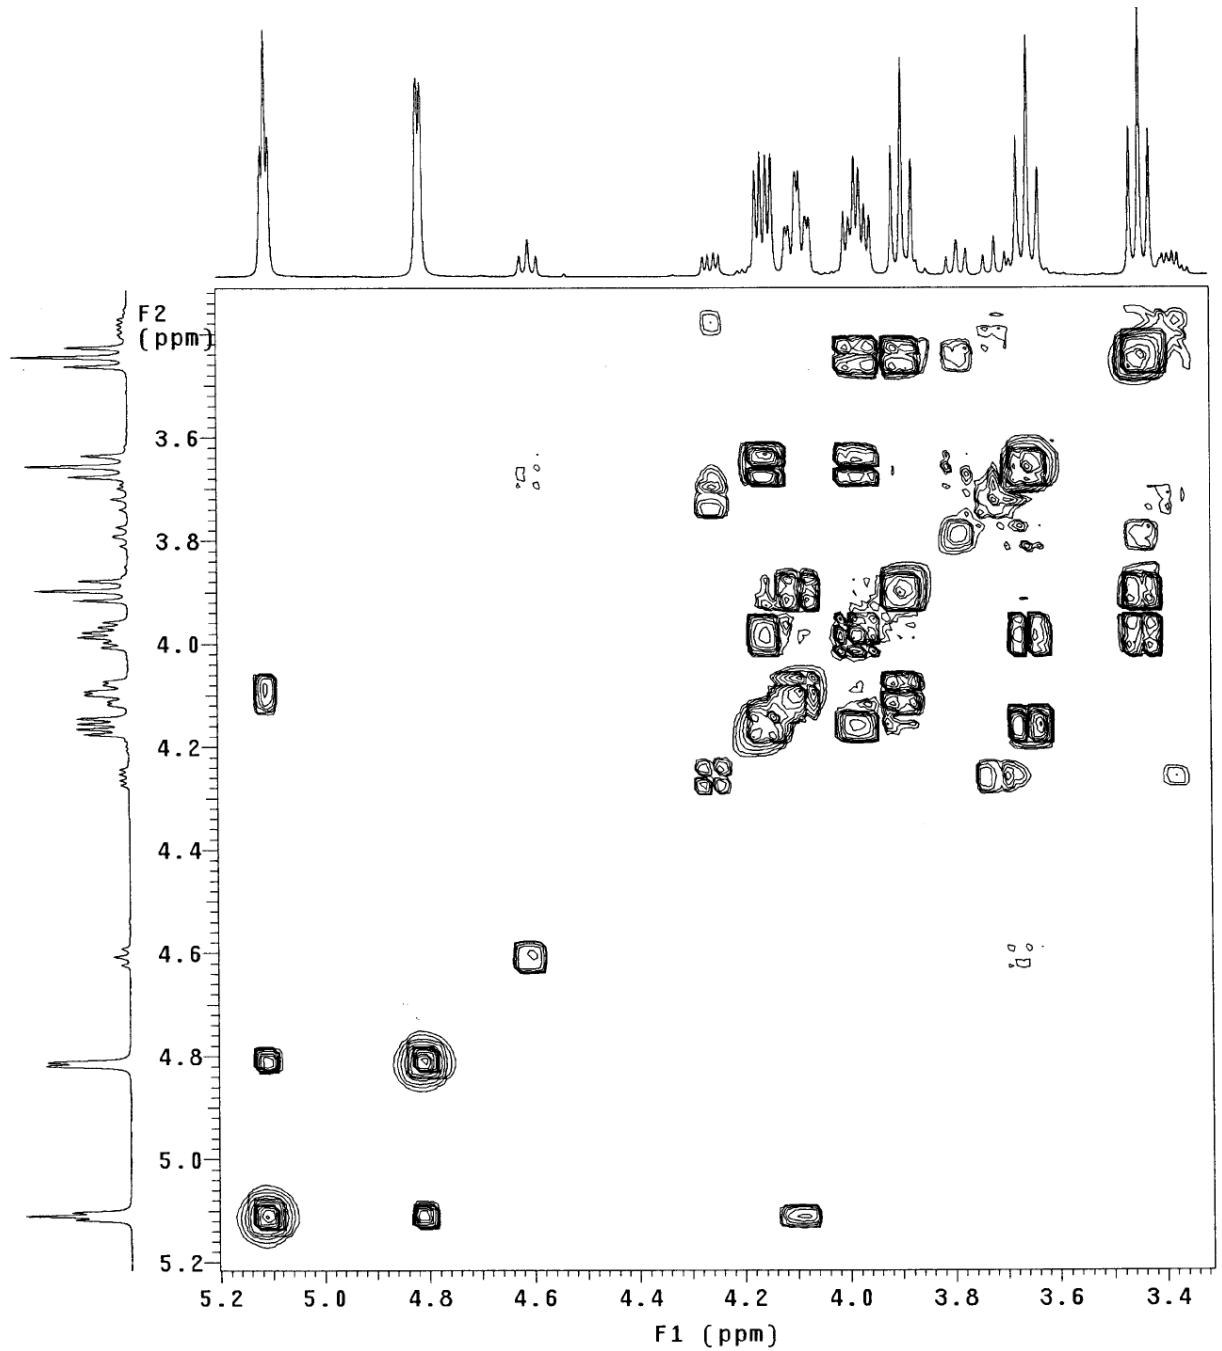

TY2-172PDC

exp1 s2pu1

```

SAMPLE          DEC. & VT
date Sep 29 2008 dfrq      499.864
solvent CDC13    dn        H1
file      exp    dpwr      30
ACQUISITION    dof        0
sfrq      499.864 dm        nnn
tn         H1    dmm        c
at         5.016 dmf        200
np         65536 dseq
sw         6533.3 dres      1.0
fb         4000  homo
bs         4
tpwr       61    dfrq2     0
pw        13.5  dn2
d1         0.100 dpwr2     1
tof        269.9 dof2      0
nt         16   dm2        n
ct         16   dmm2       c
alock      n    dmf2       200
gain      not used dseq2
          FLAGS      dres2   1.0
          n          homo2   n
in         n
dp         y    dfrq3     0
hs         nn   dn3
          DISPLAY  dpwr3    1
sp        -119.9 dof3      0
wp        5116.5 dm3        n
vs         12   dmm3       c
sc         0    dmf3       200
wc         250  dseq3
hzmm      20.47 dres3     1.0
is        128.44 homo3    n
rf1       4140.3 PROCESSING
rfp       3634.0 wtfile
th         7    proc
ins       3.000 fn        65536
ai        ph     math      f

          werr
          wexp  process pH
          wbs
          wnt   wft

```

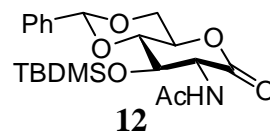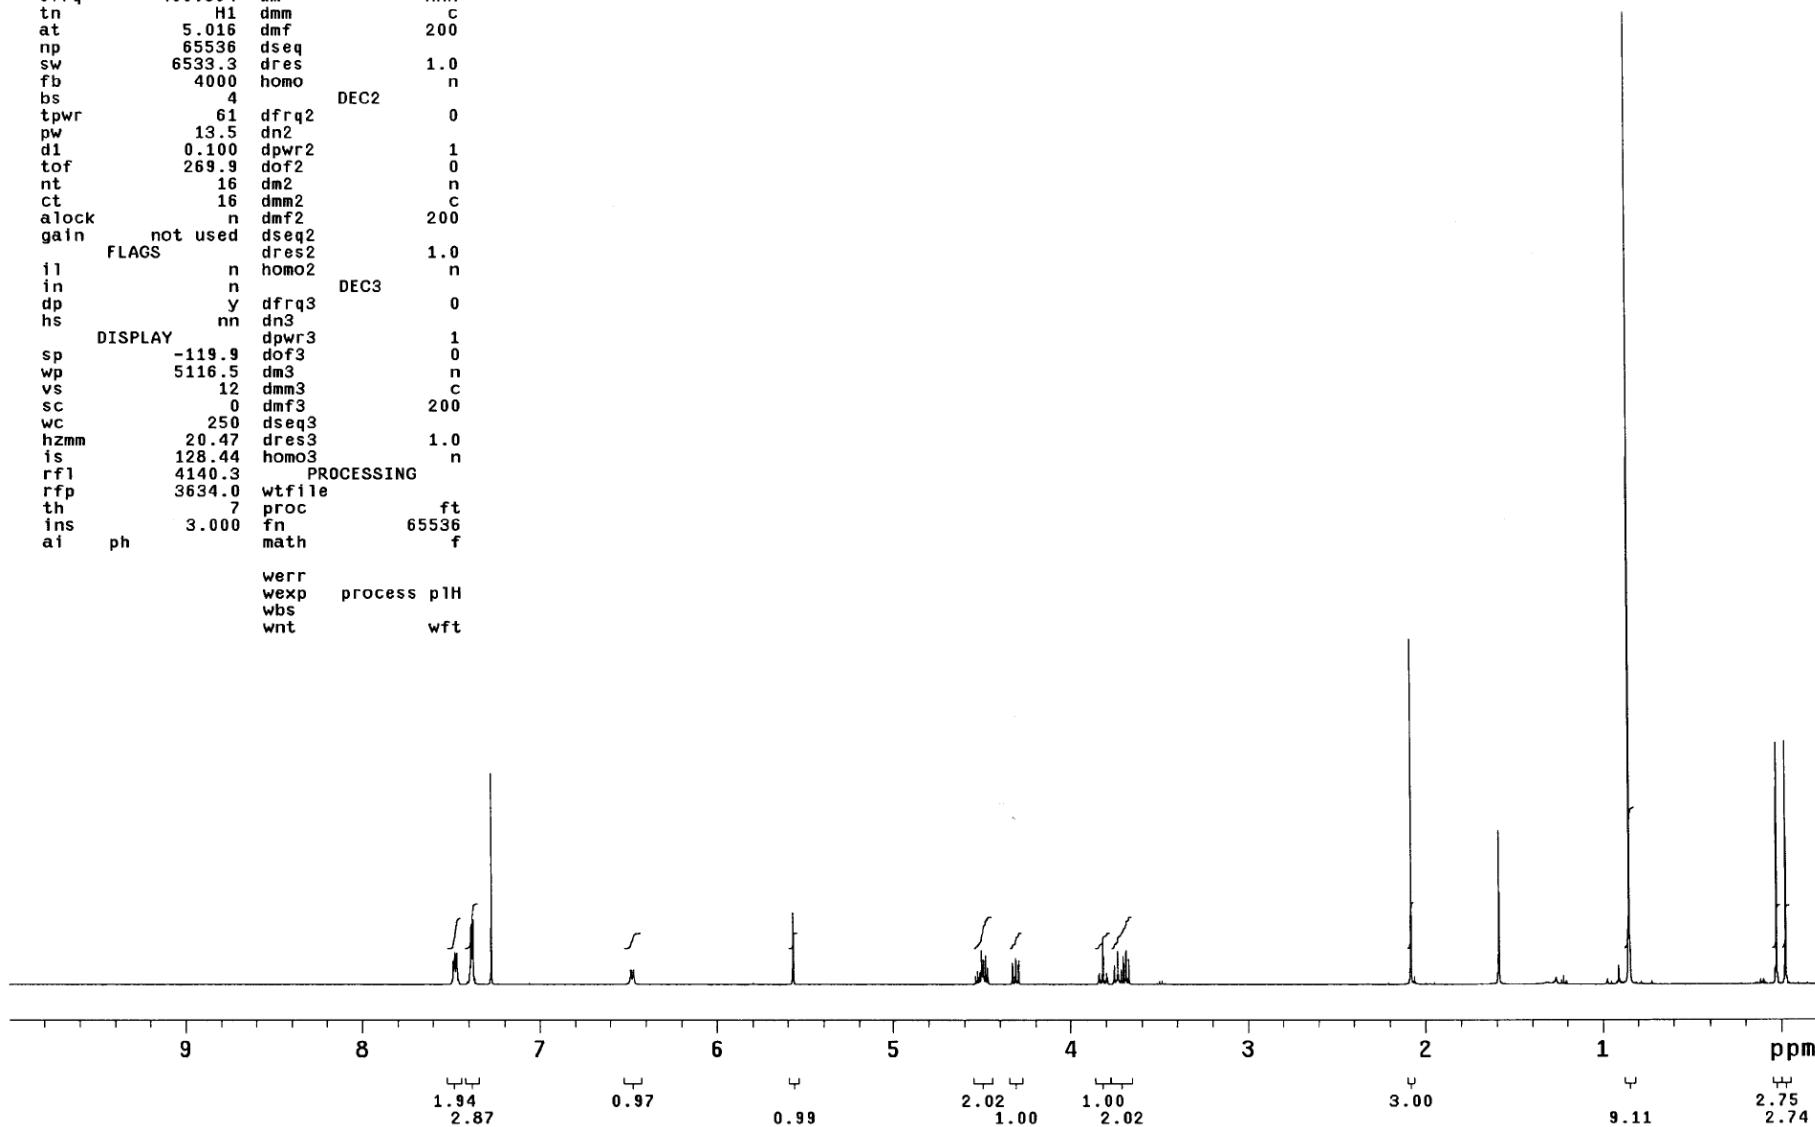

TY2-177

exp2 s2pu1

```
SAMPLE          DEC. & VT
date Oct 1 2008  dfrq      499.864
solvent CDC13    dn        H1
file          exp  dpwr      40
ACQUISITION    dof        0
sfrq          125.702  dm        yyy
tn            C13      dmm        w
at            1.215    dmf        8787.35
np            65536    dseq
sw            26963.3  dres      1.0
fb            15000   homo      n
bs            4        DEC2
tpwr          52      dfrq2     0
pw            10.2    dn2
d1            1.800   dpwr2     1
tof           144.5   dof2      0
nt            2000    dm2       n
ct            421     dmm2      c
alock         n      dmf2      10000
gain          not used dseq2
FLAGS         n      homo2     1.0
il            n      DEC3
in            n      dfrq3     0
dp            y      dn3
hs            nn     dpwr3     1
DISPLAY       dof3     0
sp            -1401.9  dm3       n
wp            26962.9 dmm3      c
vs            160     dmf3      10000
sc            0      dseq3
wc            250     dres3     1.0
hzmm          107.85  homo3     n
is            500.00  lb        not used
rf1           11109.3 wtfile
rfp           9707.1  proc      ft
th            6      fn        131072
ins           100.000 math      f
ai cdc ph      werr
                  wexp
                  wbs
                  wnt
```

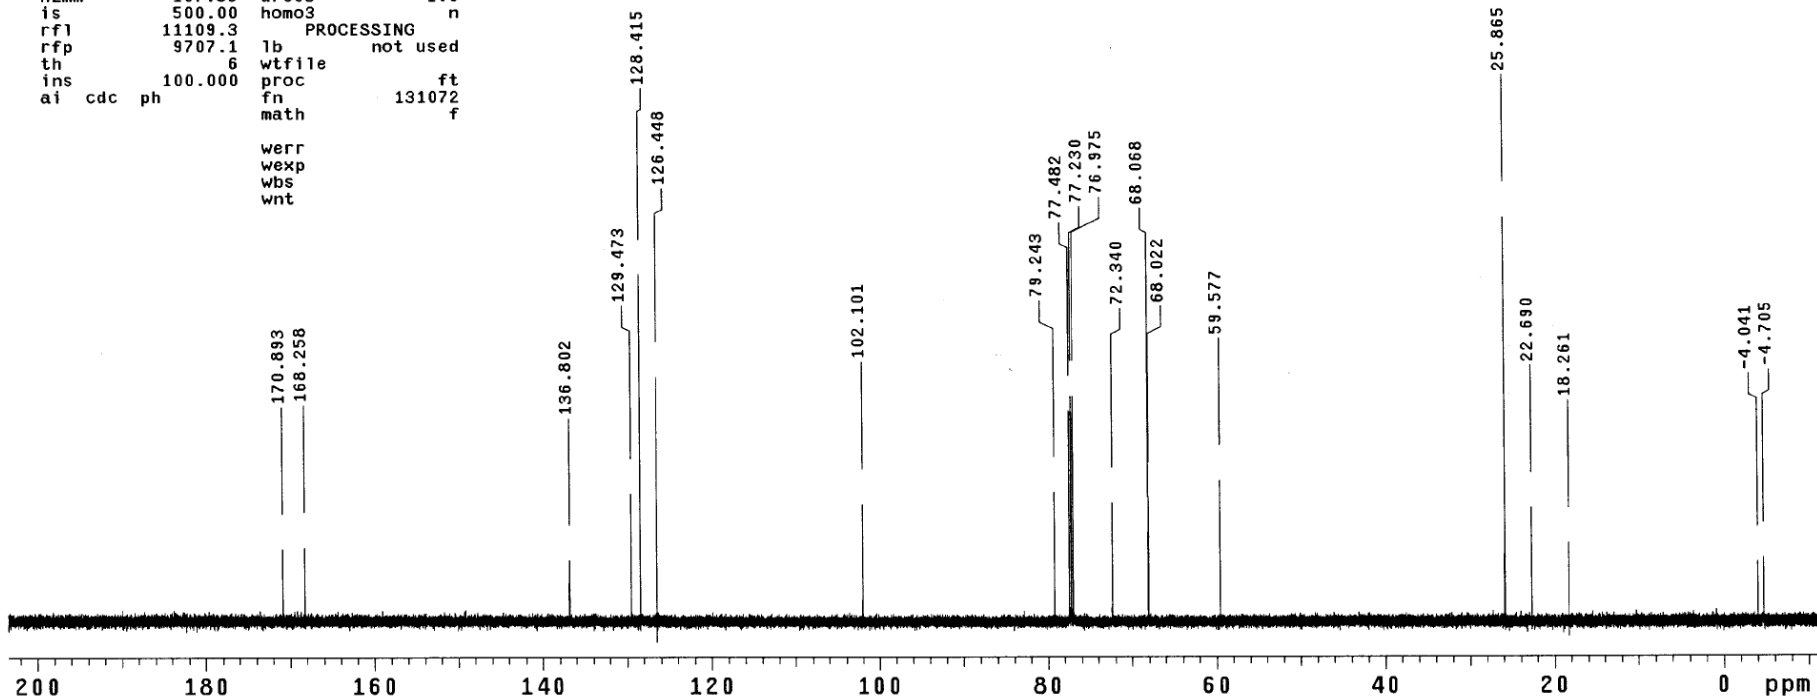



TY2-172

Pulse Sequence: relayh

Solvent: CDC13

Ambient temperature

INNOVA-500 "nmr2a.chem.nd.edu"

Relax. delay 1.300 sec

COSY 90-90

Acq. time 0.157 sec

Width 6533.3 Hz

2D Width 6533.3 Hz

16 repetitions

256 increments

OBSERVE H1, 499.8611709 MHz

DATA PROCESSING

Sine bell 0.078 sec

F1 DATA PROCESSING

Sine bell 0.039 sec

FT size 2048 x 2048

Total time 1 hr, 41 min, 40 sec

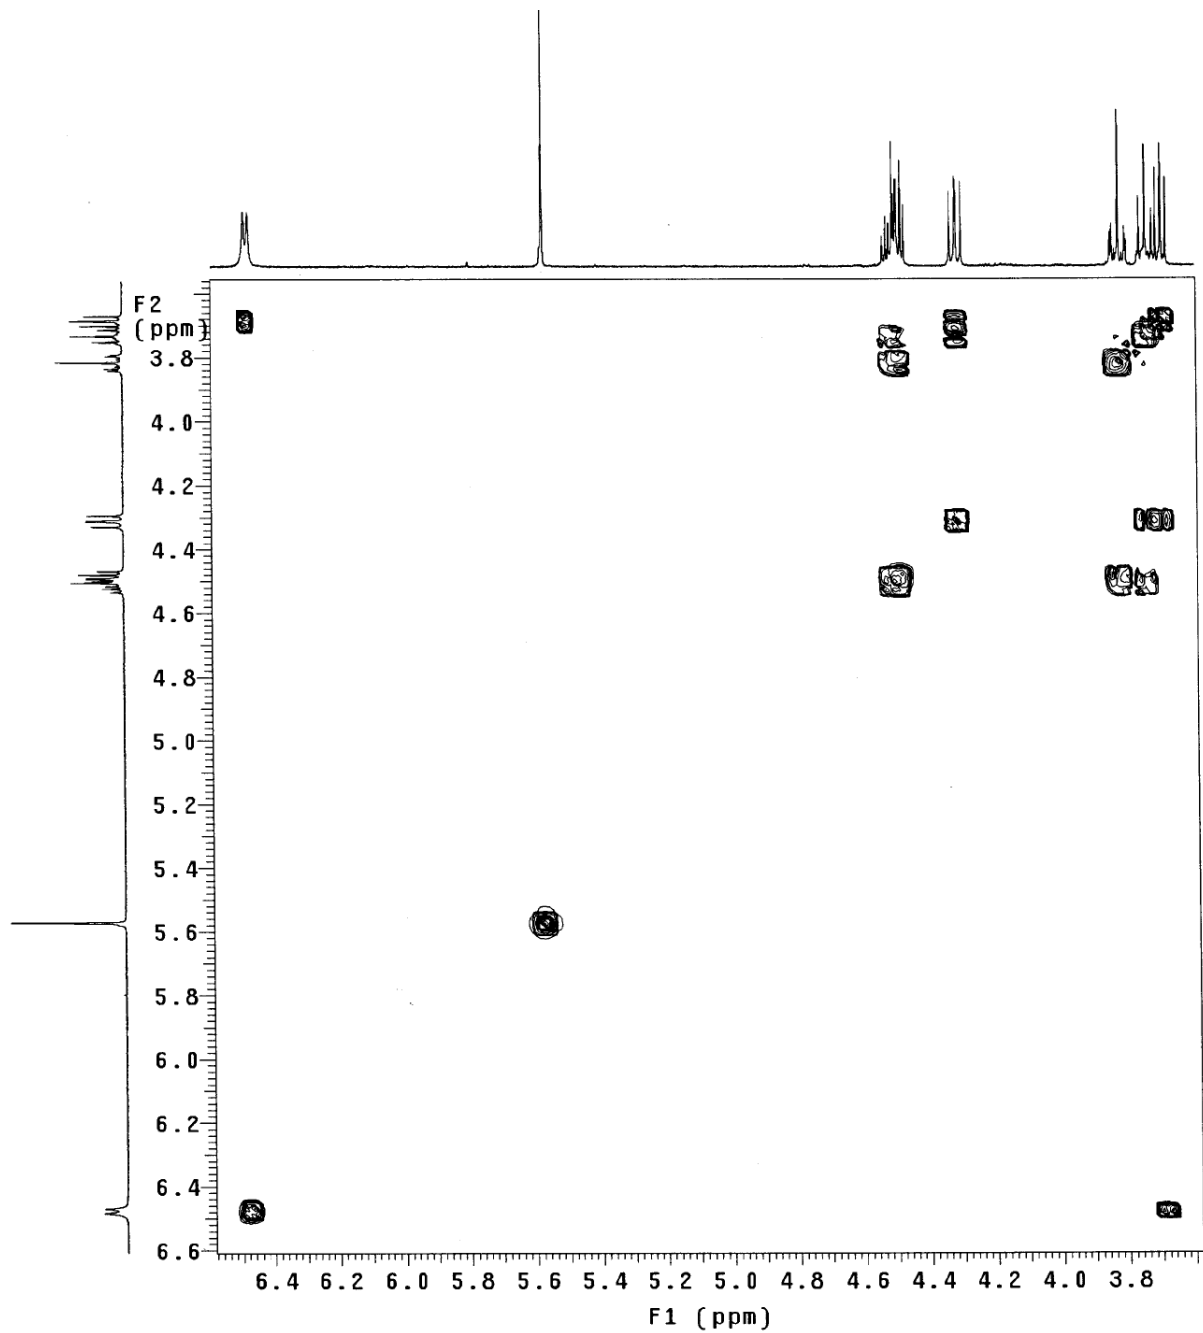

TY2-183

exp1 s2pu1

```
SAMPLE          DEC. & VT
date   Oct 6 2008  dfrq          499.864
solvent CDC13      dn           H1
file    exp       dpwr          30
ACQUISITION
sfrq    499.864   dm           nnn
tn       H1      dmm           c
at       5.016   dmf          200
np       65536   dseq
sw       6533.3  dres          1.0
fb       4000   homo
bs        4      DEC2
tpwr     61     dfrq2         0
pw      13.5   dn2
d1       0.100 dpwr2         1
tof      269.9 dof2         0
nt       16    dm2           n
ct       16    dmm2          c
alock    n     dmf2          200
gain     not used dseq2
FLAGS      n     dres2         1.0
           n     homo2         n
           n     DEC3
dp       y     dfrq3         0
hs      nn    dn3
DISPLAY  dpwr3         1
sp      -59.7  dof3         0
wp      5065.0 dm3           n
vs      28    dmm3          c
sc       0    dmf3          200
wc      250   dseq3
hzmm    20.26 dres3         1.0
is      350.72 homo3         n
rf1     4140.3 PROCESSING
rfp     3634.0 wtfile
th       7     proc
ins     3.000  fn           65536
ai      ph    math           f
werr
wexp    process pH
wbs
wnt     wft
```

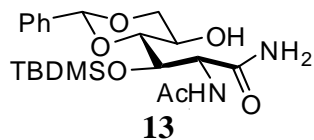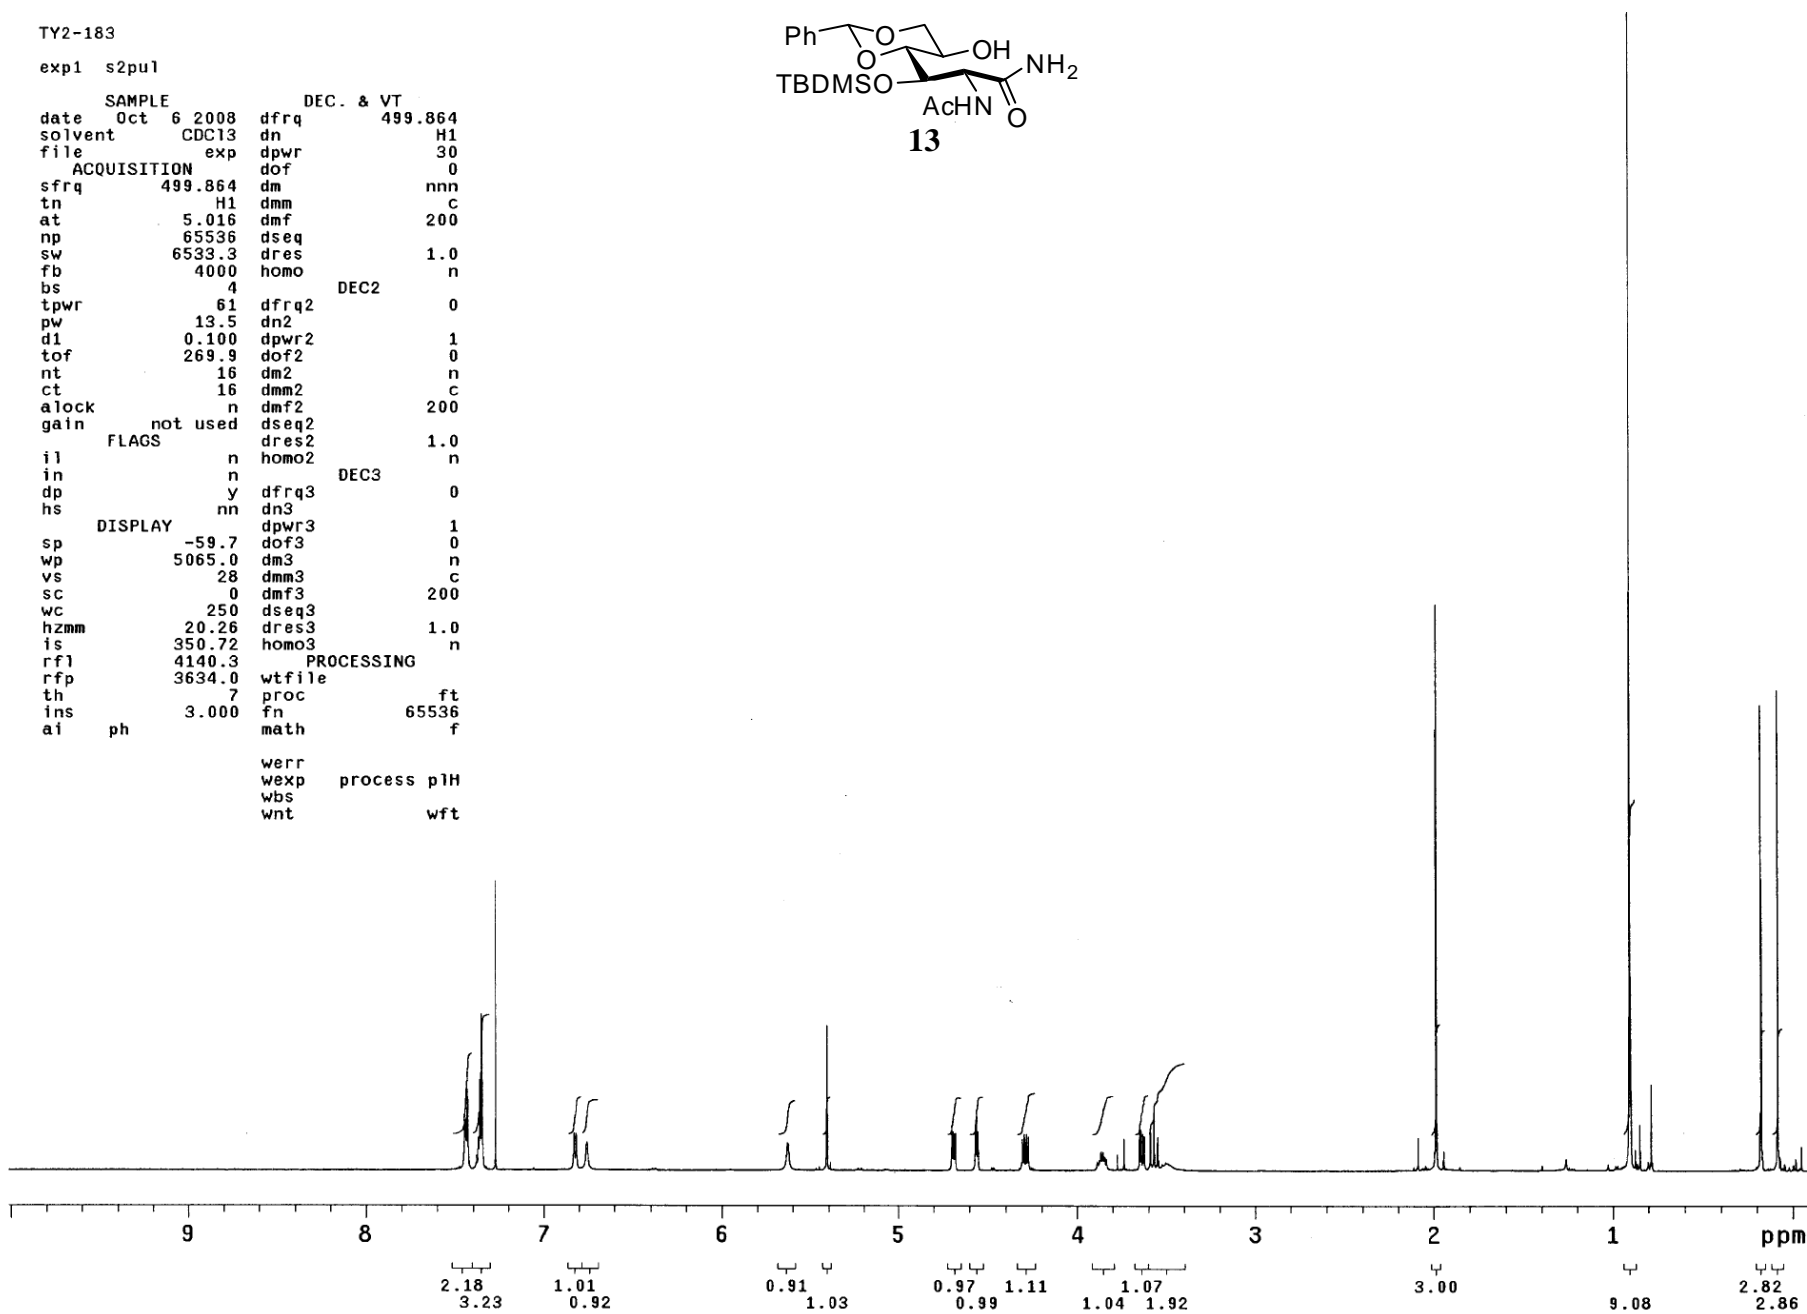

TY2-183

exp3 s2pu1

```
SAMPLE          DEC. & VT
date Oct 6 2008  dfrq      499.864
solvent CDC13    dn        H1
file exp        dpwr      40
ACQUISITION     dof       0
sfrq 125.702    dm        yyy
tn C13          dmm       w
at 1.215        dmf      8787.35
np 65536        dseq
sw 26963.3     dres      1.0
fb 15000       homo      n
bs 4           DEC2
tpwr 52        dfrq2     0
pw 10.2        dn2
d1 1.800       dpwr2     1
tof 144.5      dof2      0
nt 2000        dm2       n
ct 331         dmm2      c
alock n         dmf2     10000
gain not used  dseq2
FLAGS          dres2     1.0
il n           homo2     n
in n           DEC3
dp y           dfrq3     0
hs nn          dn3
DISPLAY        dpwr3     1
sp -1402.3     dof3      0
wp 26962.9     dm3       n
vs 124         dmm3      c
sc 0           dmf3     10000
wc 250         dseq3
hzmm 107.85    dres3     1.0
is 500.00     homo3     n
rfl 11109.8   PROCESSING
rfp 9707.1    lb        not used
th 5          wfile
ins 100.000   proc      ft
ai cdc ph    fn       131072
math        f
```

werr  
wexp  
wbs  
wnt

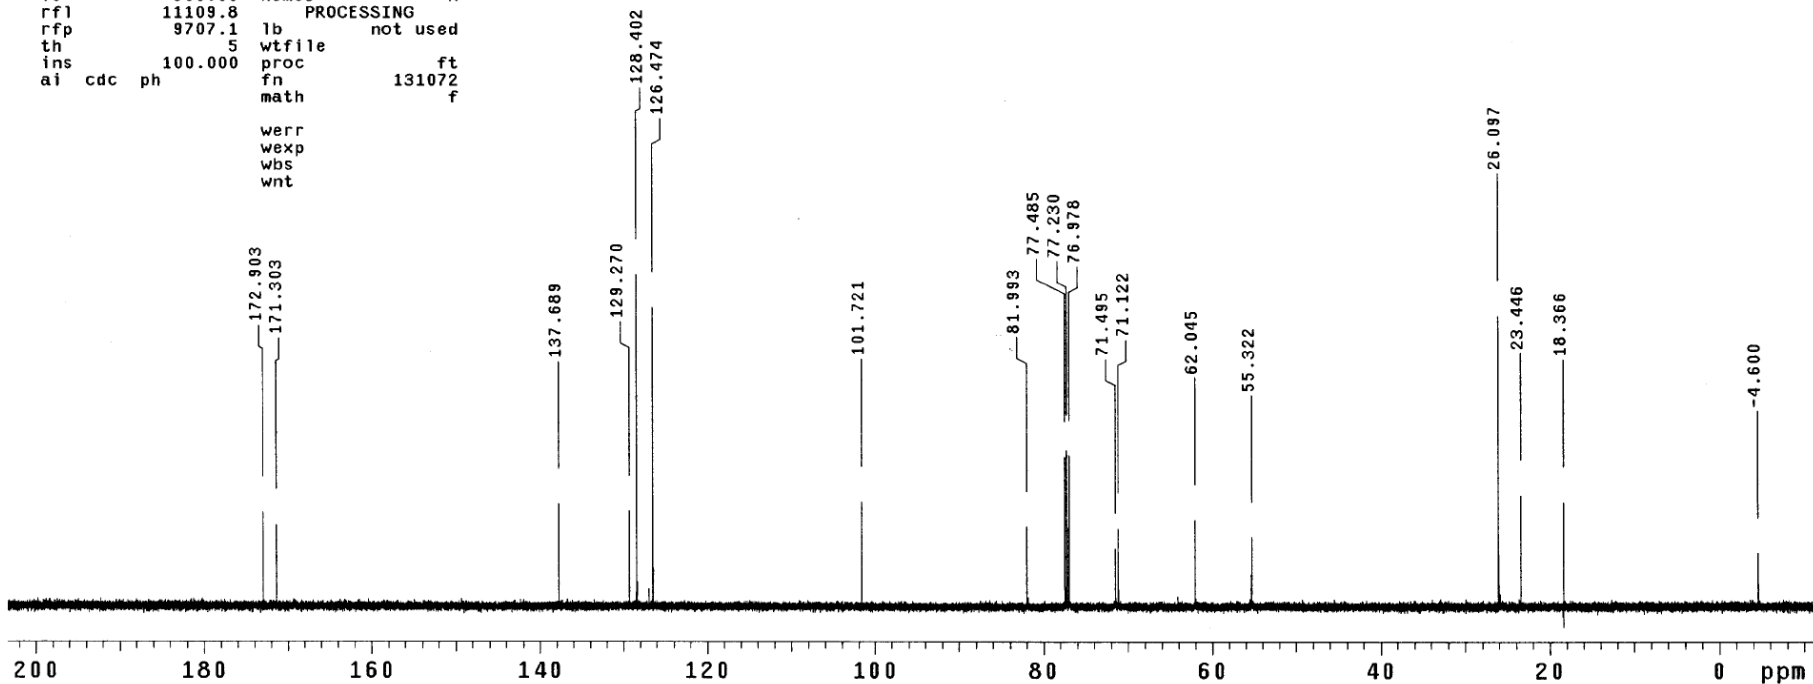

TY2-183

Pulse Sequence: relayh  
Solvent: CDC13  
Ambient temperature  
INOVA-500 "nmr2a.chem.nd.edu"

Relax. delay 1.300 sec  
COSY 90-90  
Acq. time 0.157 sec  
Width 6533.3 Hz  
2D Width 6533.3 Hz  
8 repetitions  
256 increments  
OBSERVE H1, 499.8611709 MHz  
DATA PROCESSING  
Sine bell 0.078 sec  
F1 DATA PROCESSING  
Sine bell 0.039 sec  
FT size 2048 x 2048  
Total time 50 min, 56 sec

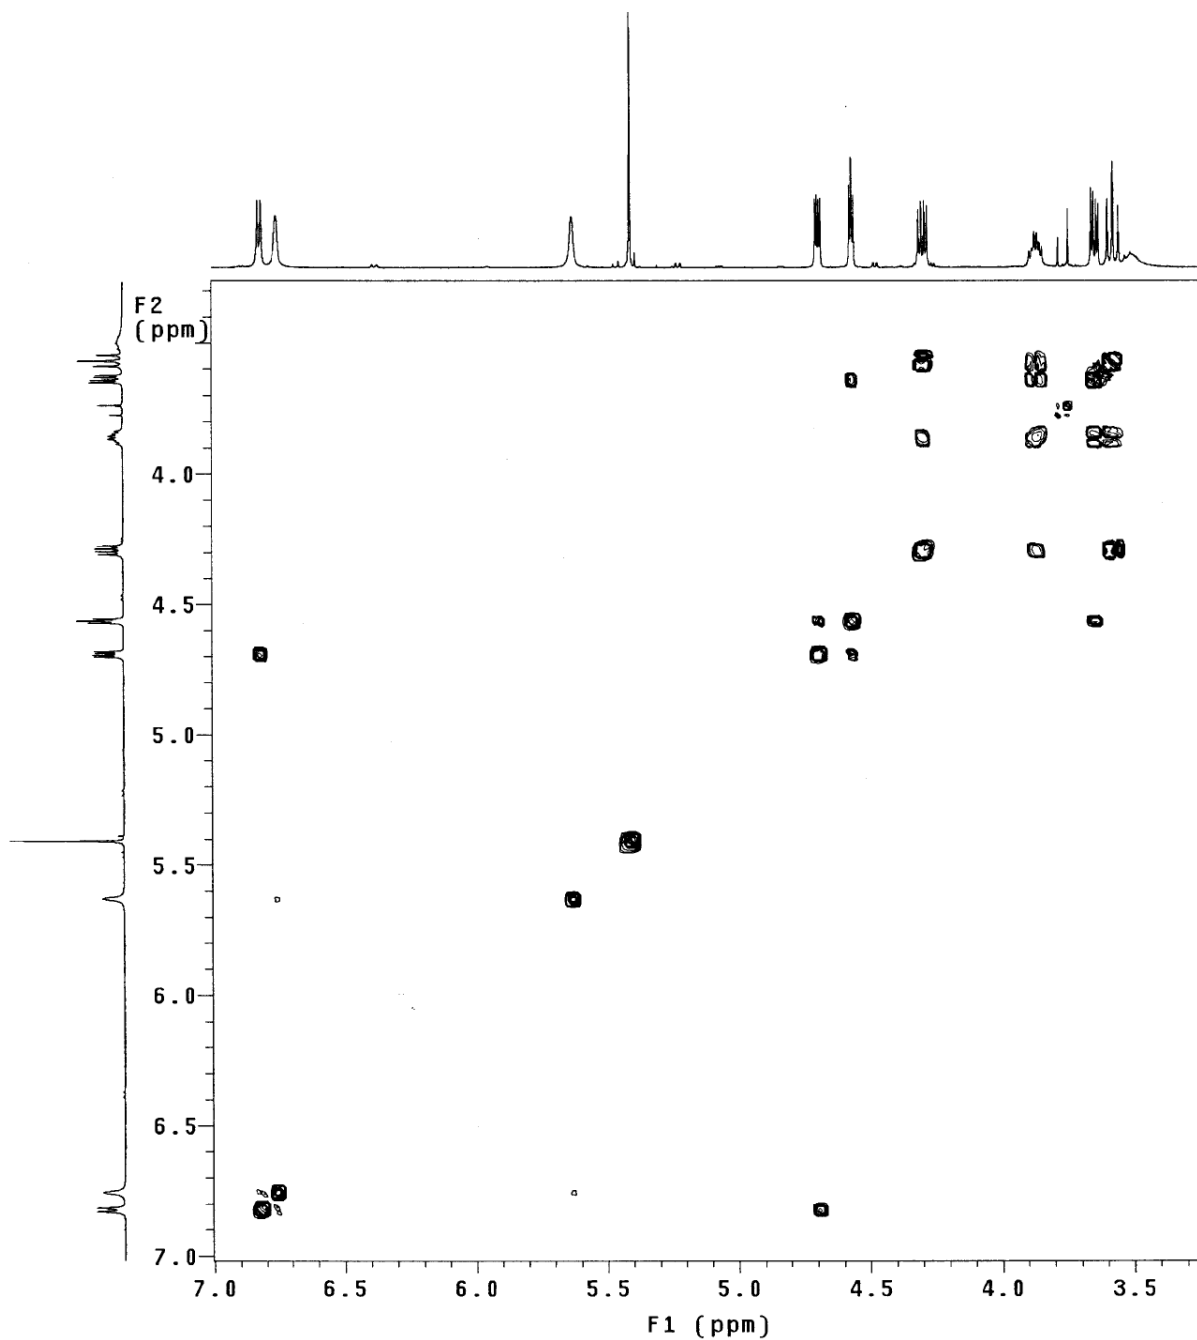

TY2-183

Pulse Sequence: hetcor

Solvent: CDC13  
Ambient temperature  
User: 1-14-87  
INOVA-500 "nmr2a.chem.nd.edu"

Relax. delay 1.500 sec  
Acq. time 0.111 sec  
Width 18403.5 Hz  
2D Width 6533.3 Hz  
16 repetitions  
256 increments  
OBSERVE C13, 125.6901669 MHz  
DECOUPLE H1, 499.8639312 MHz  
Power 40 dB  
on during acquisition  
off during delay  
WALTZ-16 modulated  
DATA PROCESSING  
Line broadening 1.0 Hz  
F1 DATA PROCESSING  
Line broadening 0.3 Hz  
FT size 4096 x 1024  
Total time 1 hr, 53 min, 6 sec

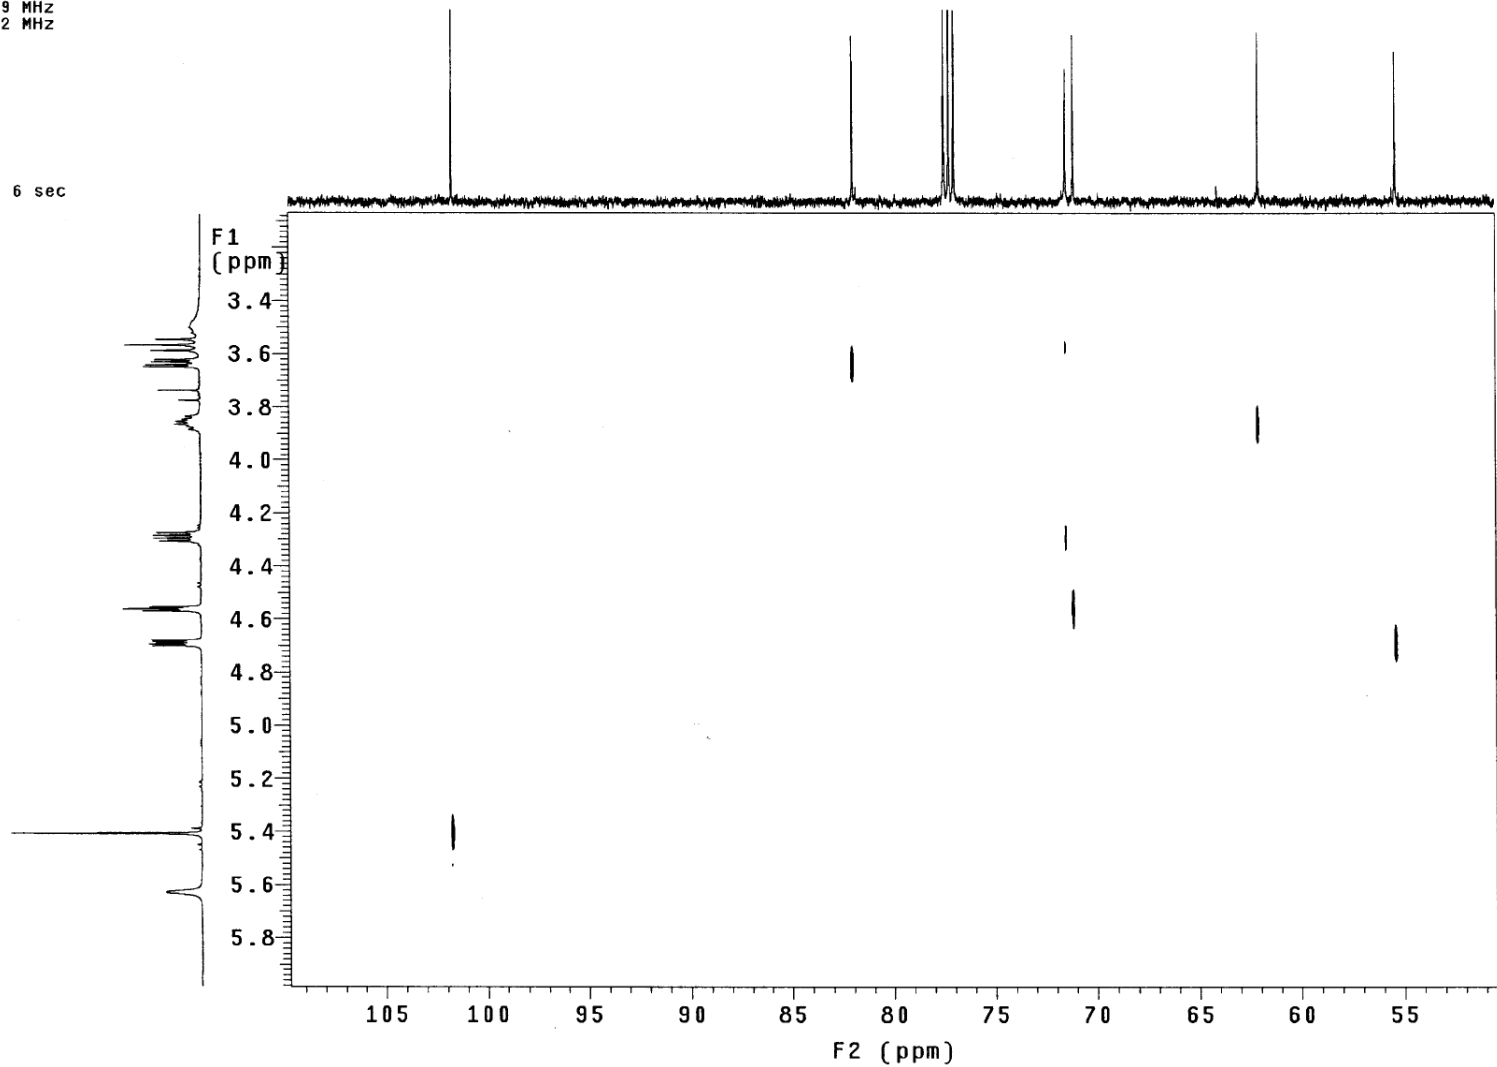

CH3 carbons

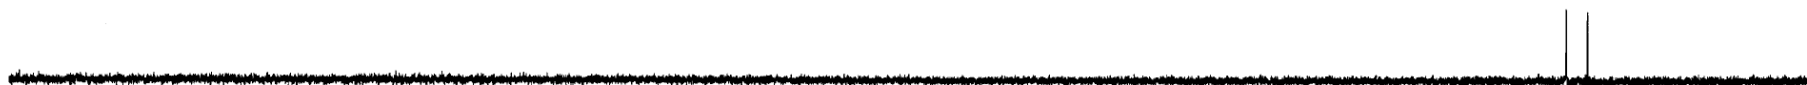

CH2 carbons

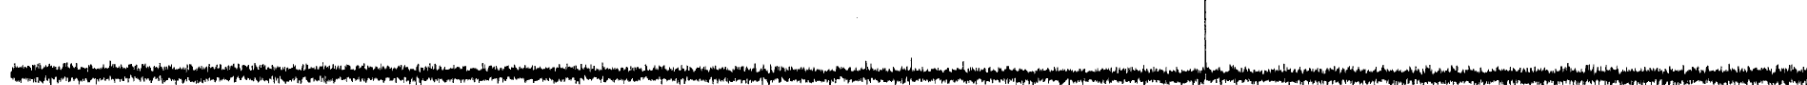

CH carbons

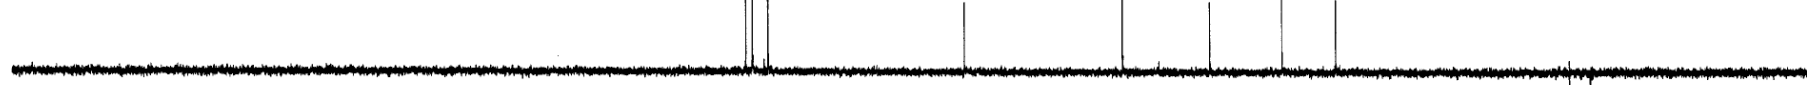

all protonated carbons

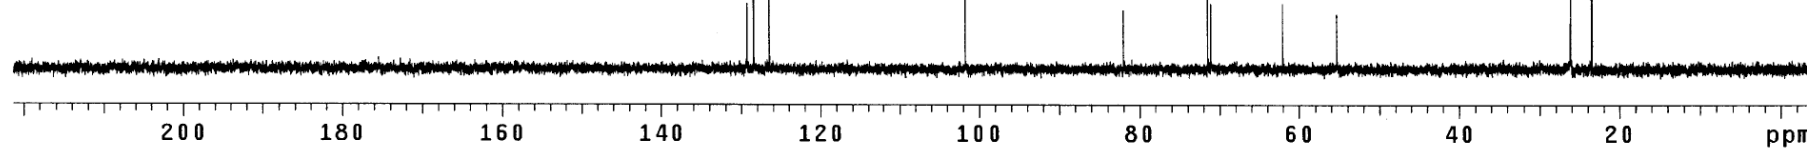

200

180

160

140

120

100

80

60

40

20

ppm

TY2-199

exp7 s2pu1

```
SAMPLE          DEC. & VT
date Oct 21 2008 dfrq          499.864
solvent CDC13      dn          H1
file exp          dpwr         30
ACQUISITION     dof          0
sfrq 499.864     dm           nmn
tn H1            dmm           c
at 5.016         dmf           200
np 65536         dseq          1.0
sw 6533.3        dres          n
fb 4000          homo
bs 4             DEC2
tpwr 61          dfrq2         0
pw 13.5          dn2           1
d1 0.100         dpwr2         0
tof 269.9        dof2          n
nt 8             dm2           c
ct 8             dmm2          200
alock n          dmf2          1.0
gain not used    dseq2         n
FLAGS n          dres2         n
il n             homo2
in n             DEC3
dp y            dfrq3         0
hs nn          dn3           1
DISPLAY dpwr3    1
sp -68.5        dof3          0
wp 5065.0       dm3           n
vs 45          dmm3          c
sc 0           dmf3          200
wc 250         dseq3         1.0
hzmm 20.26     dres3         n
is 344.44      homo3
rfl 506.3      PROCESSING
rfp 0          wfile
th 7           proc         ft
ins 9.000      fn           65536
al ph          math         f
werr
wexp process pH
wbs
wnt wft
```

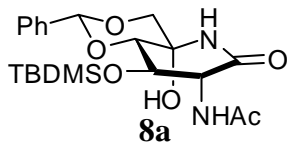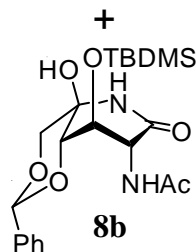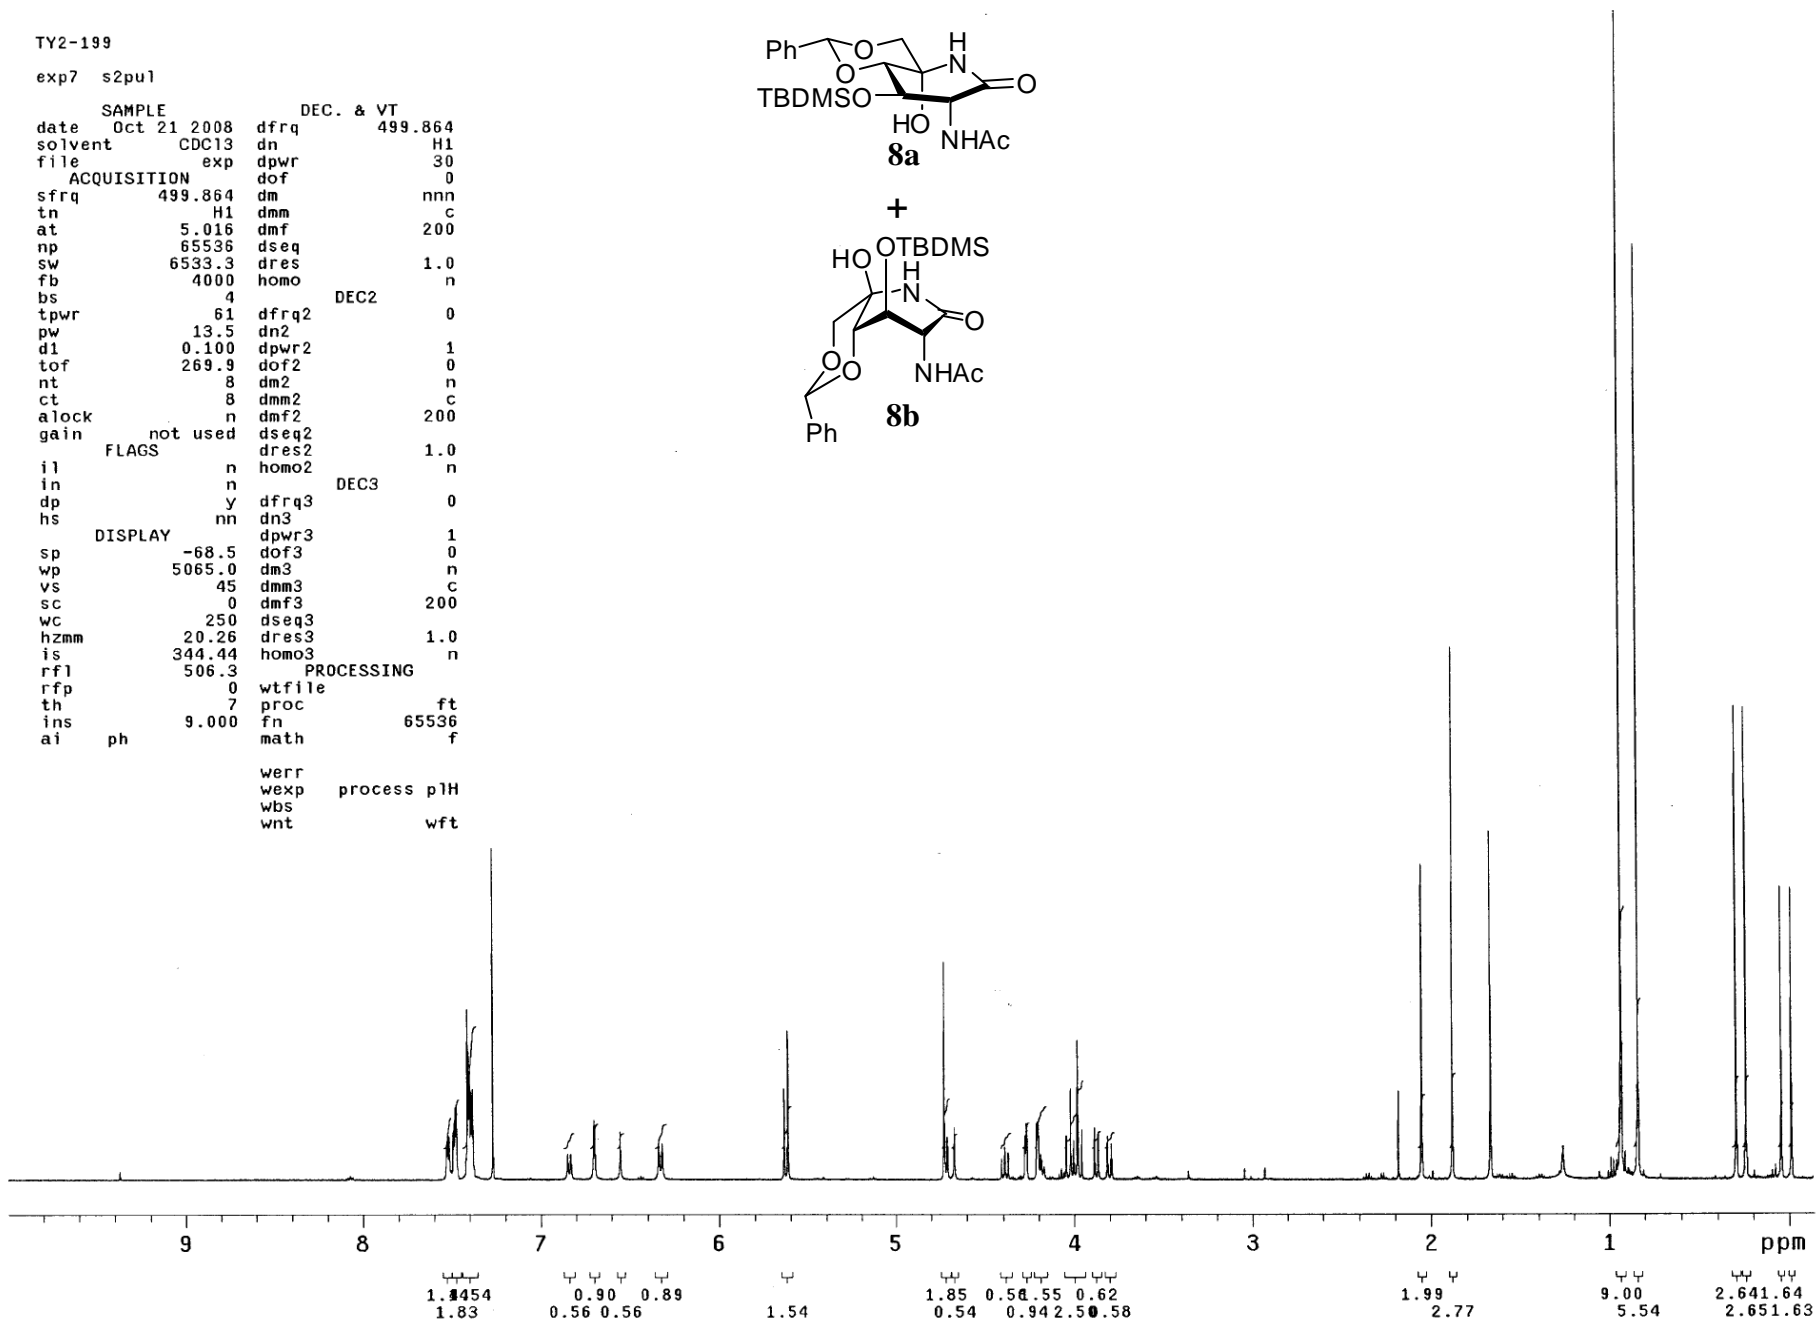

TY2-199

exp2 s2pu1

|             |             |            |          |
|-------------|-------------|------------|----------|
| SAMPLE      |             | DEC. & VT  |          |
| date        | Oct 21 2008 | dfrq       | 499.864  |
| solvent     | CDC13       | dn         | H1       |
| file        | exp         | dpwr       | 40       |
| ACQUISITION |             | dof        | 0        |
| sfrq        | 125.702     | dm         | yyy      |
| tn          | C13         | dmm        | w        |
| at          | 1.215       | dmf        | 8787.35  |
| np          | 65536       | dseq       |          |
| sw          | 26963.3     | dres       | 1.0      |
| fb          | 15000       | homo       | n        |
| bs          | 4           | DEC2       |          |
| tpwr        | 52          | dfrq2      | 0        |
| pw          | 10.2        | dn2        |          |
| d1          | 1.800       | dpwr2      | 1        |
| tof         | 144.5       | dof2       | 0        |
| nt          | 3000        | dm2        | n        |
| ct          | 896         | dmm2       | c        |
| alock       | n           | dmf2       | 10000    |
| gain        | not used    | dseq2      |          |
| FLAGS       |             | dres2      | 1.0      |
| il          | n           | homo2      | n        |
| in          | n           | DEC3       |          |
| dp          | y           | dfrq3      | 0        |
| hs          | nn          | dn3        |          |
| DISPLAY     |             | dpwr3      | 1        |
| sp          | -1401.5     | dof3       | 0        |
| wp          | 26962.9     | dm3        | n        |
| vs          | 333         | dmm3       | c        |
| sc          | 0           | dmf3       | 10000    |
| wc          | 250         | dseq3      |          |
| hzmm        | 107.85      | dres3      | 1.0      |
| is          | 500.00      | homo3      | n        |
| rfl         | 11108.9     | PROCESSING |          |
| rfp         | 9707.1      | lb         | not used |
| th          | 3           | wfile      |          |
| ins         | 1.000       | proc       | ft       |
| ai          | cdc ph      | fn         | 131072   |
|             |             | math       | f        |
|             |             | werr       |          |
|             |             | wexp       |          |
|             |             | wbs        |          |
|             |             | wnt        |          |

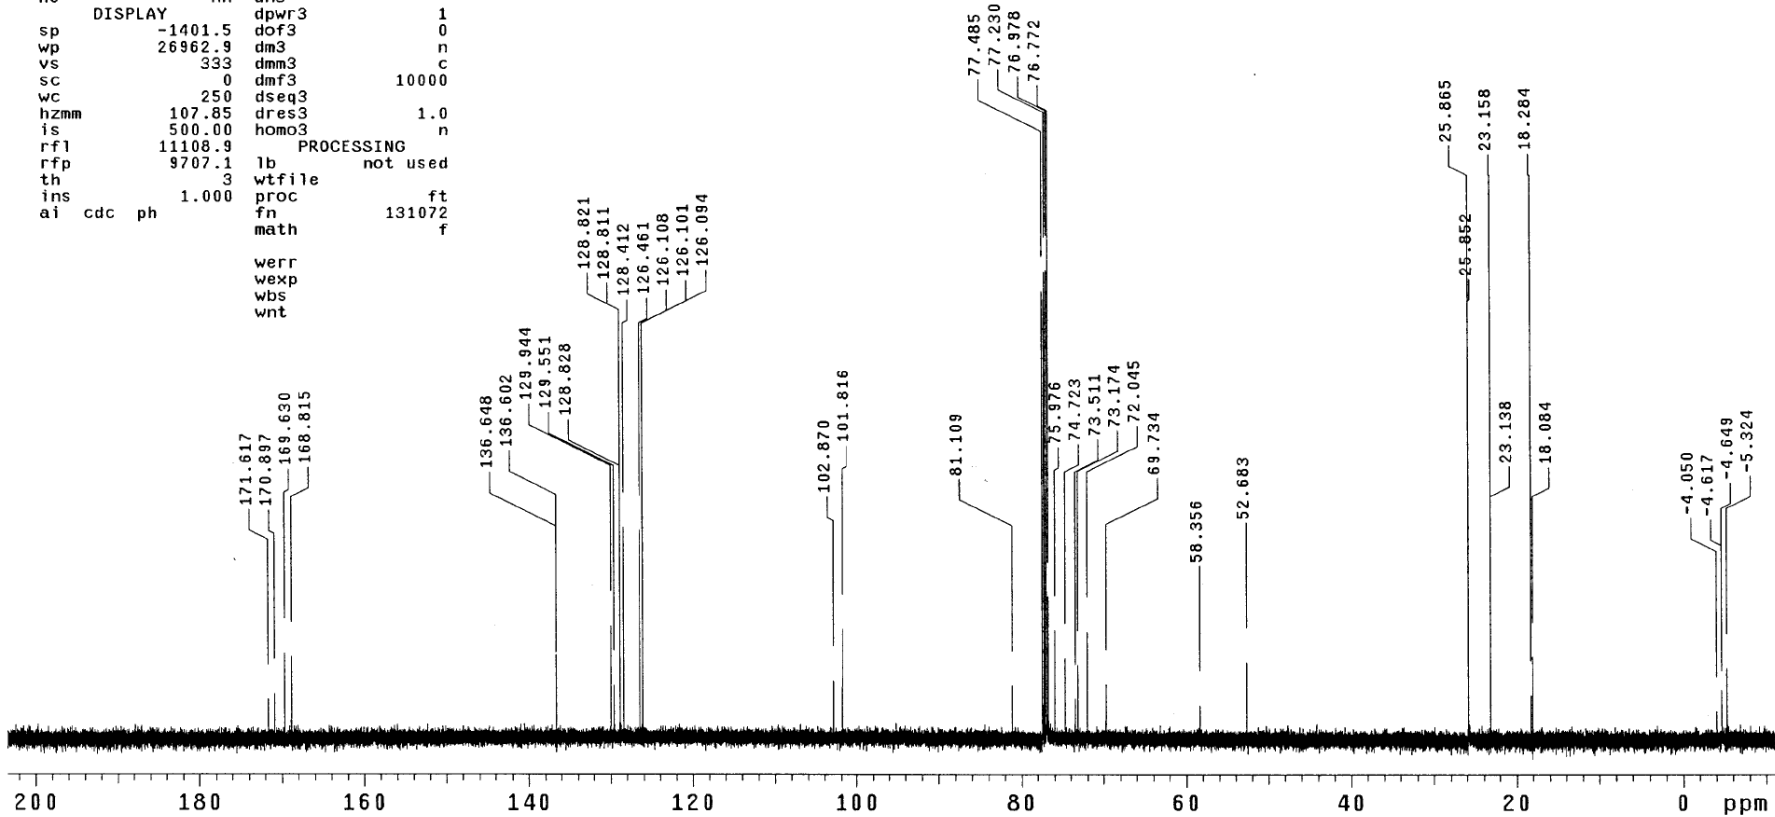



TY2-199

Pulse Sequence: relayh

Solvent: CDCl<sub>3</sub>

Ambient temperature

INOVA-500 "nmr2a.chem.nd.edu"

Relax. delay 1.300 sec

COSY 90-90

Acq. time 0.157 sec

Width 6533.3 Hz

2D Width 6533.3 Hz

16 repetitions

256 increments

OBSERVE H1, 499.8611709 MHz

DATA PROCESSING

Sine bell 0.078 sec

F1 DATA PROCESSING

Sine bell 0.039 sec

FT size 2048 x 2048

Total time 1 hr, 41 min, 40 sec

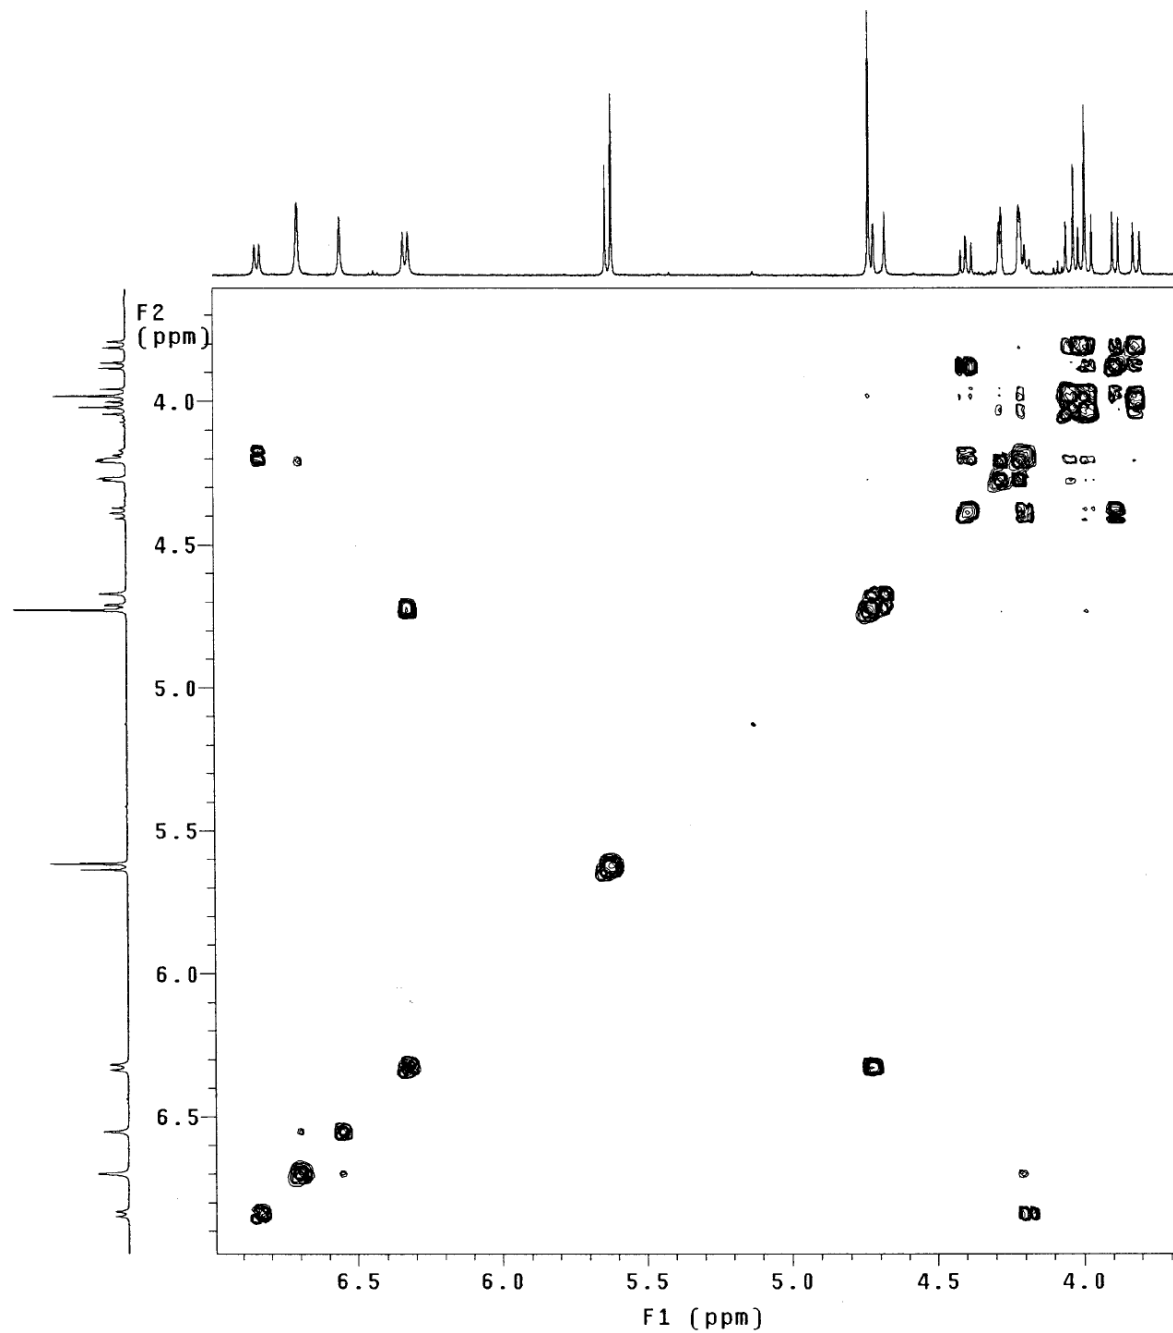

TY2-199

Pulse Sequence: hetcor

Solvent: CDC13

Ambient temperature

User: 1-14-87

INOVA-500 "nmr2a.chem.nd.edu"

Relax. delay 1.500 sec

Acq. time 0.111 sec

Width 18403.5 Hz

2D Width 6533.3 Hz

32 repetitions

256 increments

OBSERVE C13, 125.6901661 MHz

DECOUPLE H1, 499.8639312 MHz

Power 40 dB

on during acquisition

off during delay

WALTZ-16 modulated

DATA PROCESSING

Line broadening 1.0 Hz

F1 DATA PROCESSING

Line broadening 0.3 Hz

FT size 4096 x 1024

Total time 3 hr, 46 min, 5 sec

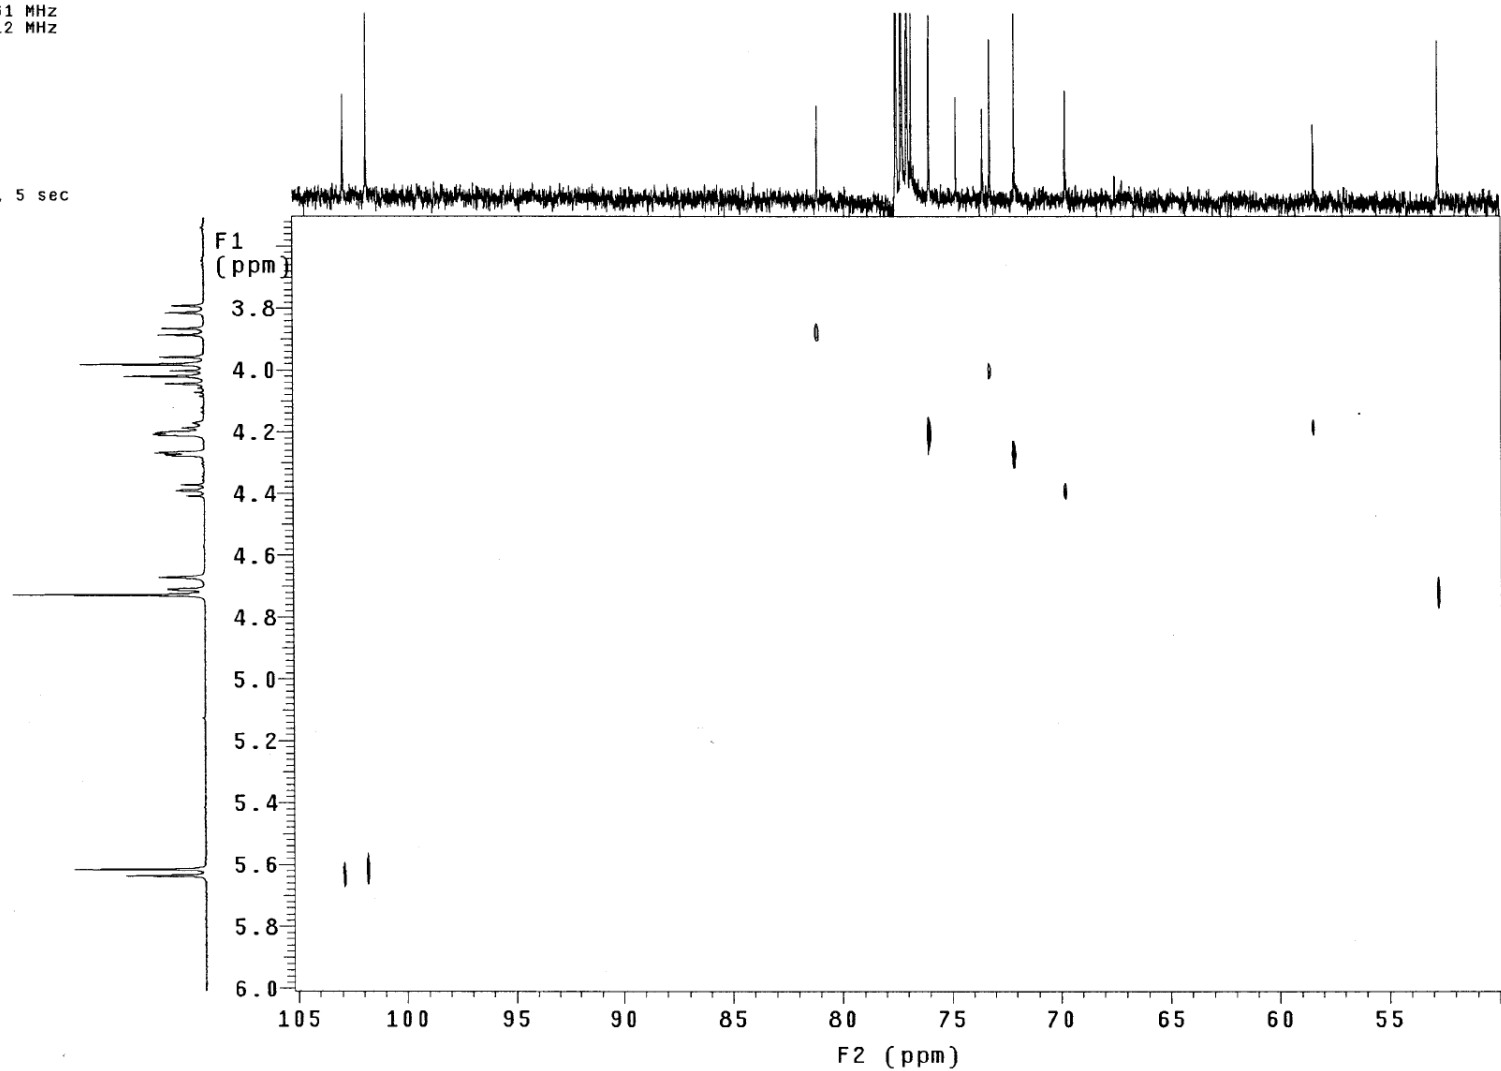

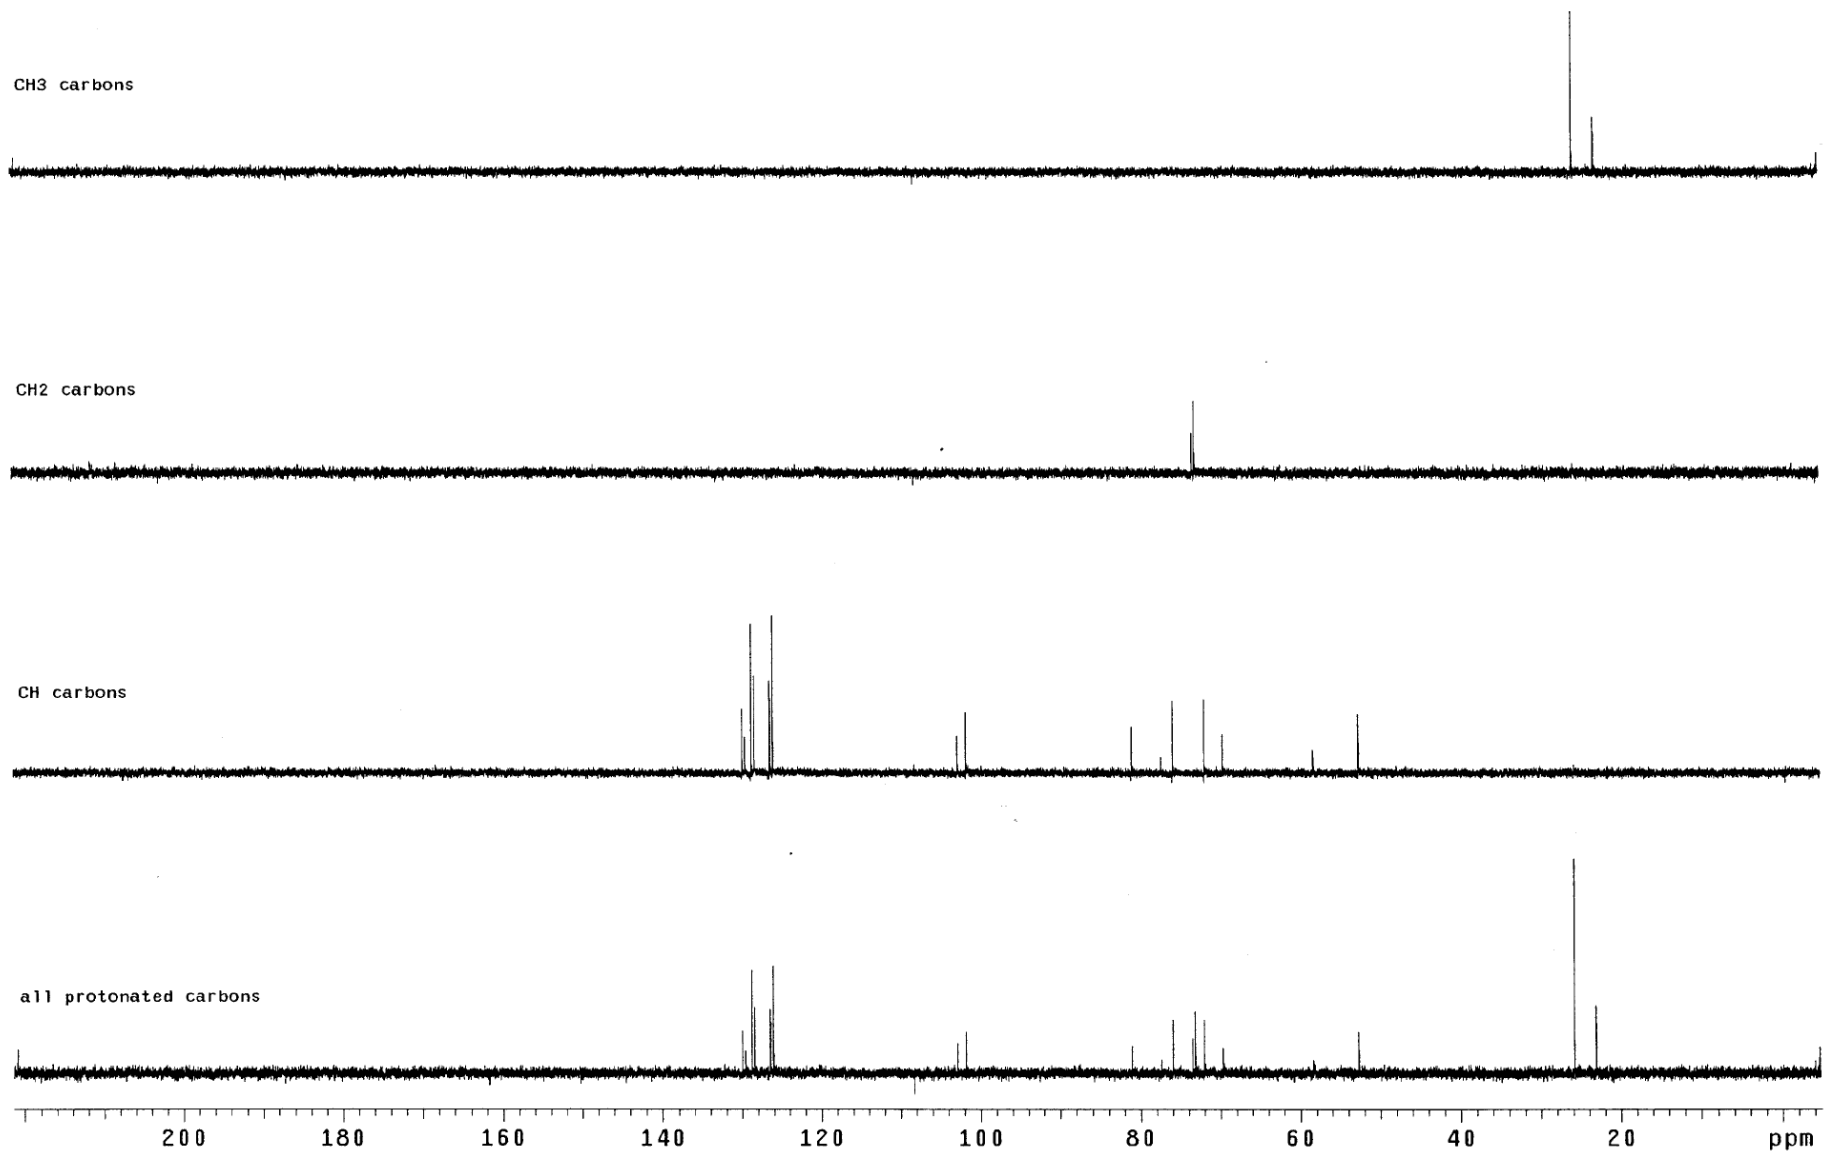

TY2-210-c8-15

exp1 s2pu1

```
SAMPLE          DEC. & VT
date Nov 3 2008 dfrq          499.864
solvent CDC13      dn          H1
file      exp      dpwr         30
ACQUISITION     dof          0
sfrq          499.864 dm          nnn
tn            H1    dmm          c
at           5.016  dmf         200
np           65536  dseq
sw           6533.3 dres         1.0
fb           4000  homo
bs            4
tpwr          61    dfrq2        0
pw           13.5  dn2
d1           0.100 dpwr2         1
tof          269.9 dof2         0
nt           16   dm2          n
ct           16   dmm2         c
alock        n    dmf2         200
gain         not used dseq2
FLAGS        n    dres2         1.0
              n    homo2        n
in           n
dp           y    dfrq3        0
hs          nn   dn3
DISPLAY      dpwr3         1
sp          -137.5 dof3         0
wp          5125.1 dm3          n
vs           36   dmm3         c
sc            0   dmf3         200
wc           250  dseq3
hzmm        20.50 dres3         1.0
is          331.22 homo3        n
rf1         4140.7 PROCESSING
rfp         3634.0 wtfile
th            7    proc          ft
ins         9.000  fn          65536
ai          ph    math          f
werr
wexp        process pH
wbs
wnt         wft
```

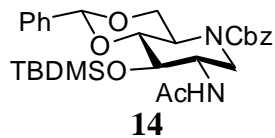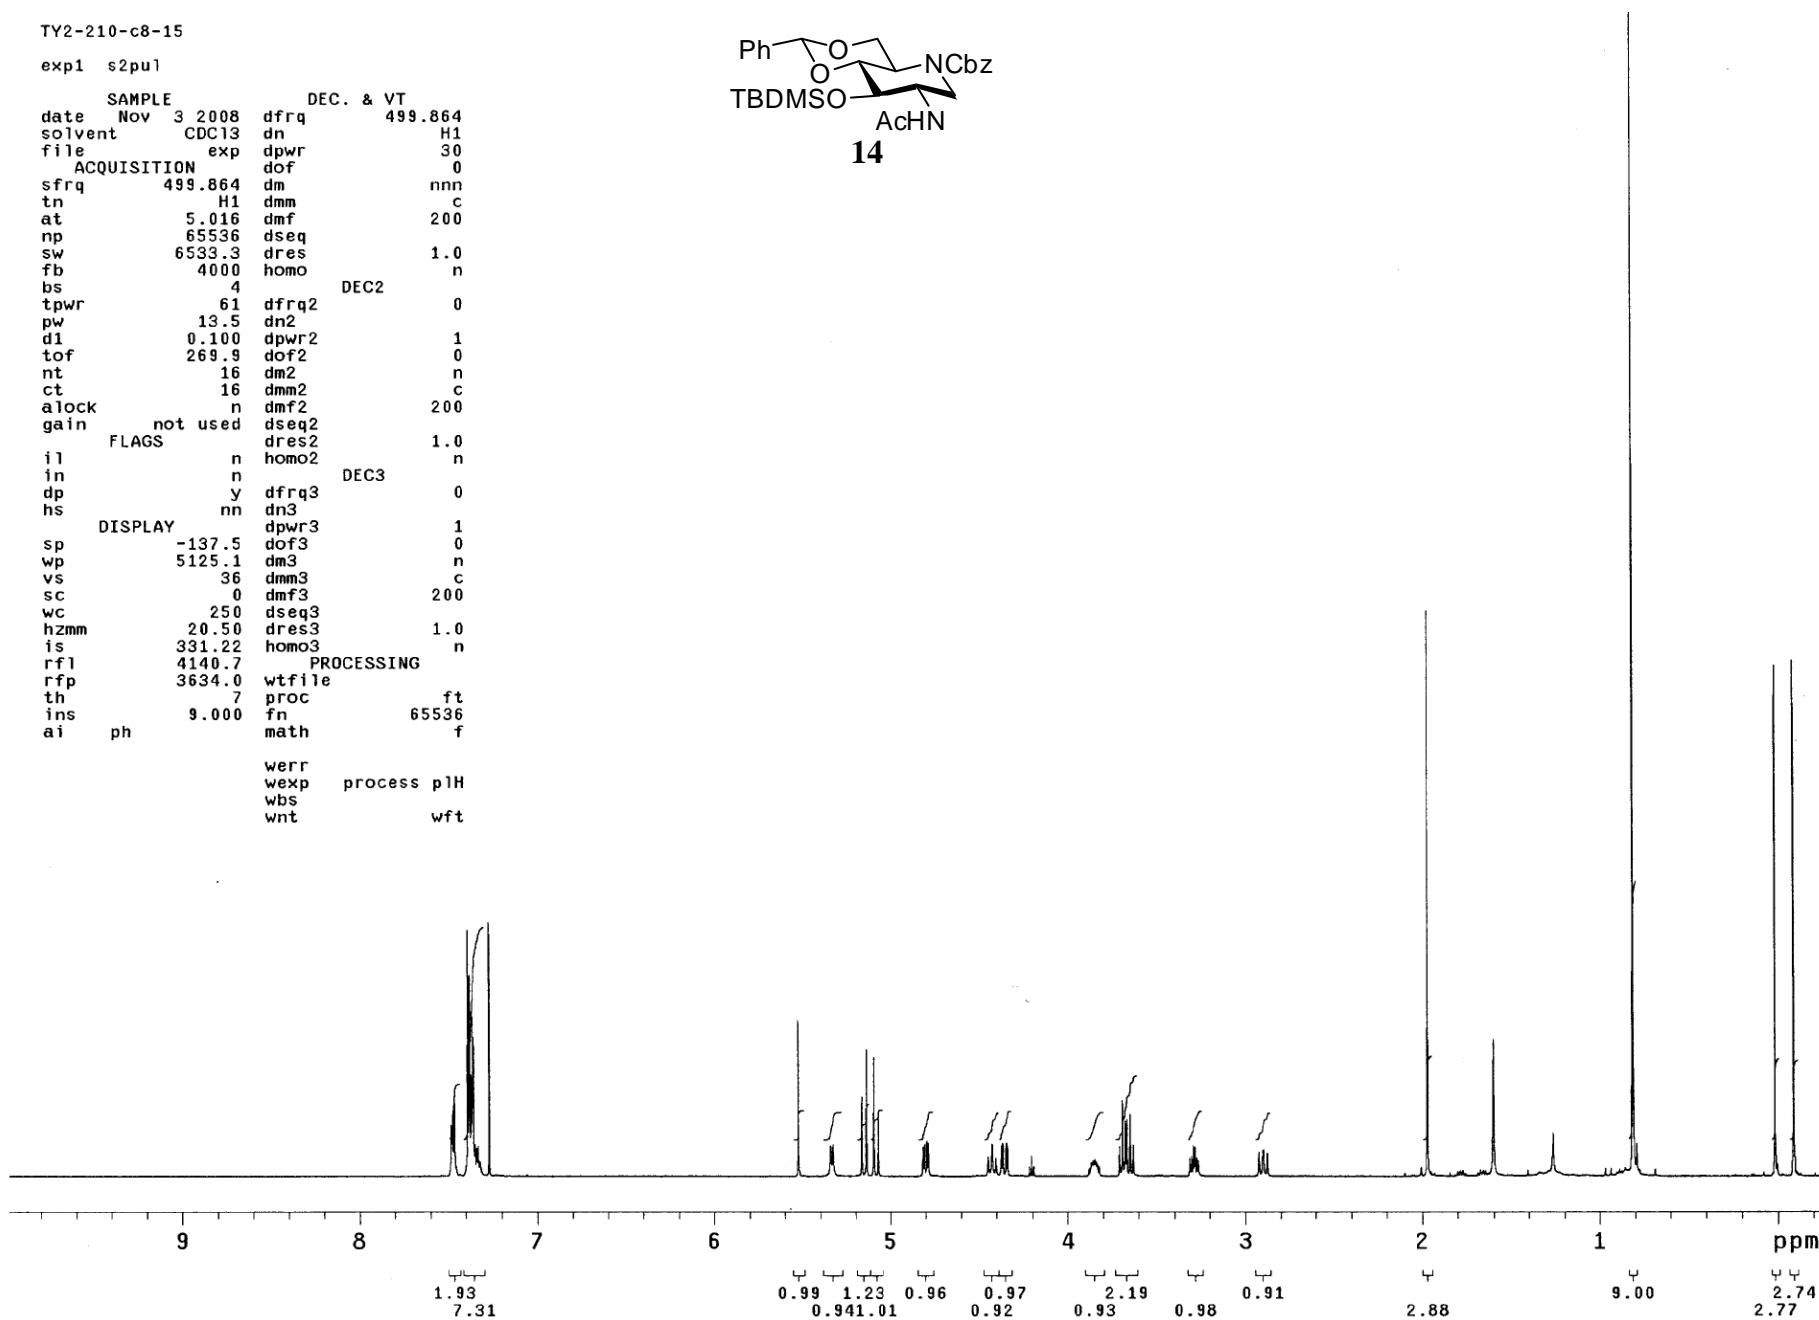

TY2-210-c8-15

exp3 s2pu1

```
SAMPLE          DEC. & VT
date Nov 3 2008 dfrq          499.864
solvent CDC13     dn          H1
file exp         dpwr         40
ACQUISITION     dof          0
sfrq 125.702    dm           YYY
tn C13          dmm          w
at 1.215        dmf          8787.35
np 65536        dseq
sw 26963.3      dres          1.0
fb 15000        homo          n
bs 4            DEC2
tpwr 52         dfrq2         0
pw 10.2         dn2
d1 1.800        dpwr2         1
tof 144.5       dof2         0
nt 2000        dm2          n
ct 808         dmm2         c
alock n         dmf2         10000
gain not used   dseq2
FLAGS          dres2         1.0
              homo2         n
il n           DEC3
in n           dfrq3         0
dp y          dn3
hs nn         dpwr3         1
DISPLAY       dof3         0
sp -1401.1     dm3          n
wp 26962.9    dmm3         c
vs 421        dmf3         10000
sc 0          dseq3
wc 250        dres3         1.0
hzmm 107.85   homo3         n
is 500.00    PROCESSING
rf1 11108.5   lb not used
rfp 9707.1    wtfile
th 4          proc
ins 100.000   fn 131072
ai cdc ph    math f
```

```
werr
wexp
wbs
wnt
```

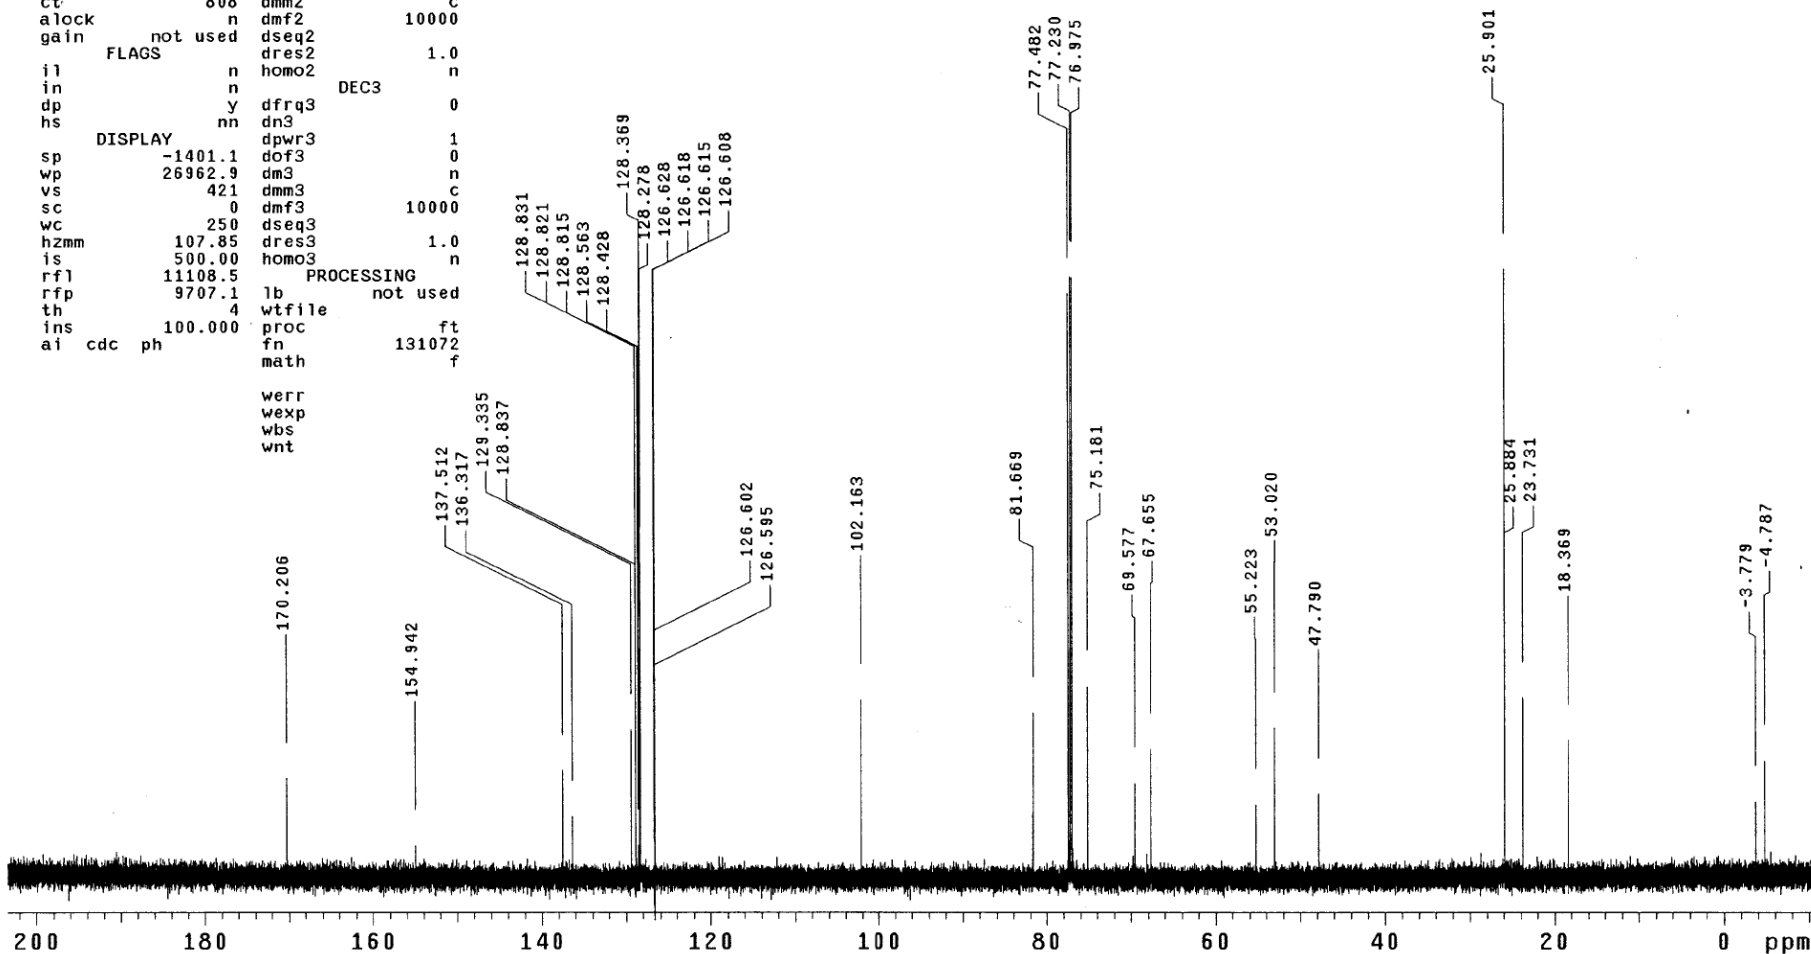

TY2-210-c8-15

Pulse Sequence: relayh  
Solvent: CDC13  
Ambient temperature  
INOVA-500 "nmr2a.chem.nd.edu"

Relax. delay 1.300 sec  
COSY 90-90  
Acq. time 0.157 sec  
Width 6533.3 Hz  
2D Width 6533.3 Hz  
16 repetitions  
256 increments  
OBSERVE H1 499.8611751 MHz  
DATA PROCESSING  
Sine bell 0.078 sec  
F1 DATA PROCESSING  
Sine bell 0.039 sec  
FT size 2048 x 2048  
Total time 1 hr, 41 min, 40 sec

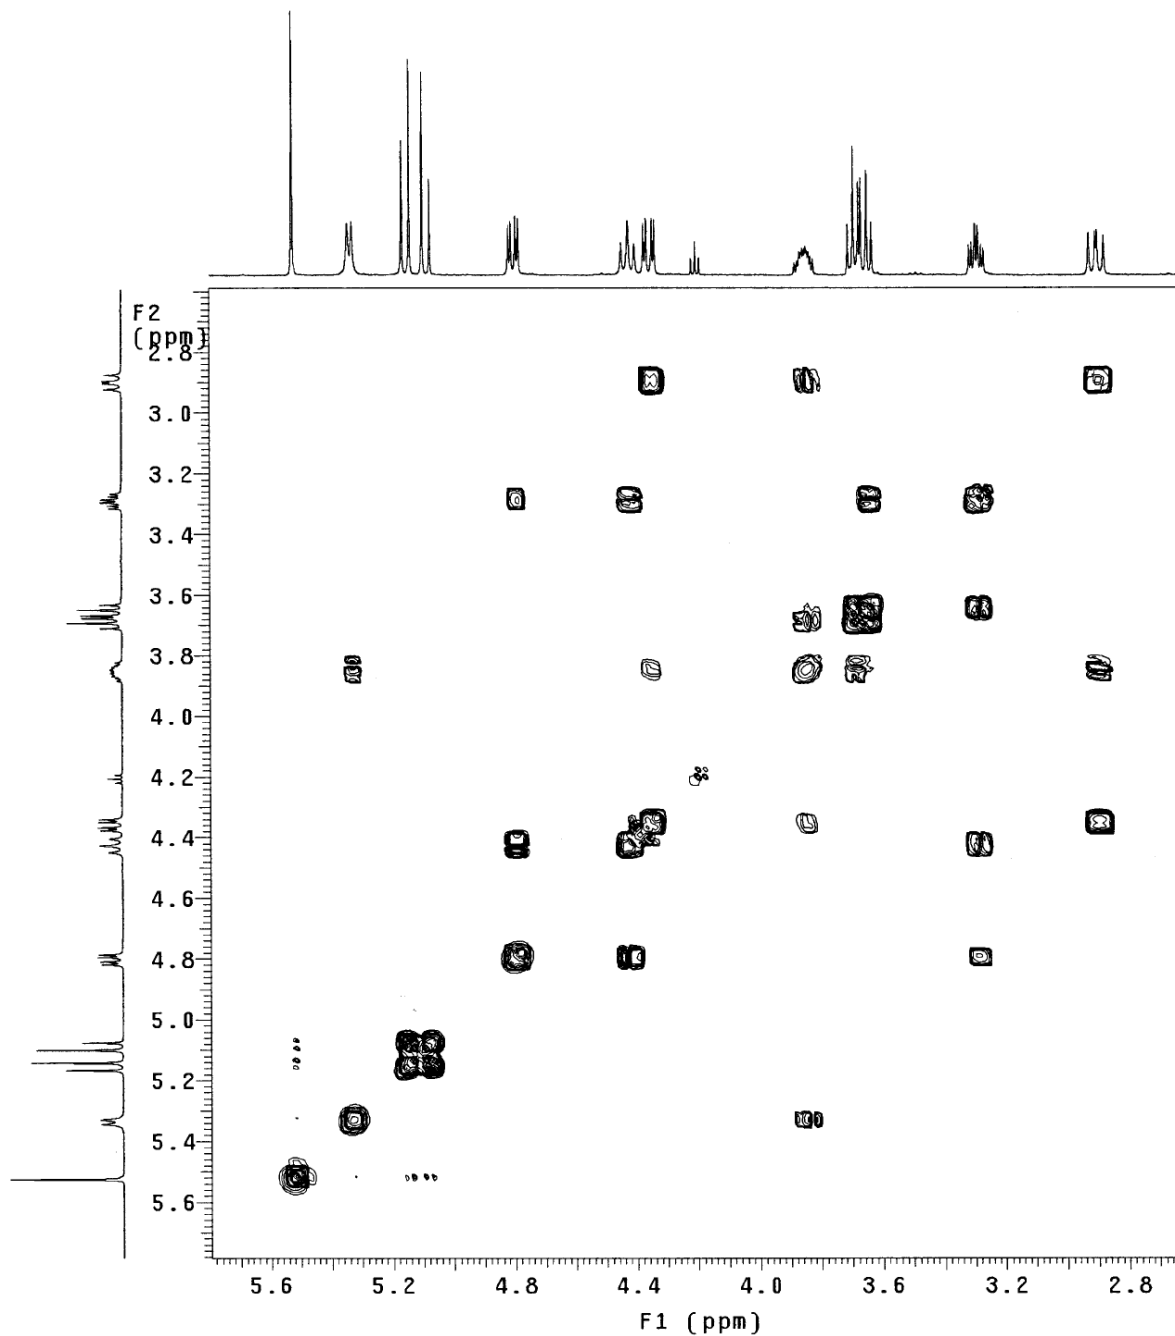

TY2-210-c8-15

Pulse Sequence: hetcor

Solvent: CDC13

Ambient temperature

User: 1-14-87

INOVA-500 "nmr2a.chem.nd.edu"

Relax. delay 1.500 sec

Acq. time 0.111 sec

Width 18403.5 Hz

2D Width 6533.3 Hz

64 repetitions

256 increments

OBSERVE C13, 125.6901656 MHz

DECOUPLE H1, 499.8639312 MHz

Power 40 dB

on during acquisition

off during delay

WALTZ-16 modulated

DATA PROCESSING

Line broadening 1.0 Hz

F1 DATA PROCESSING

Line broadening 0.3 Hz

FT size 4096 x 1024

Total time 7 hr, 32 min, 4 sec

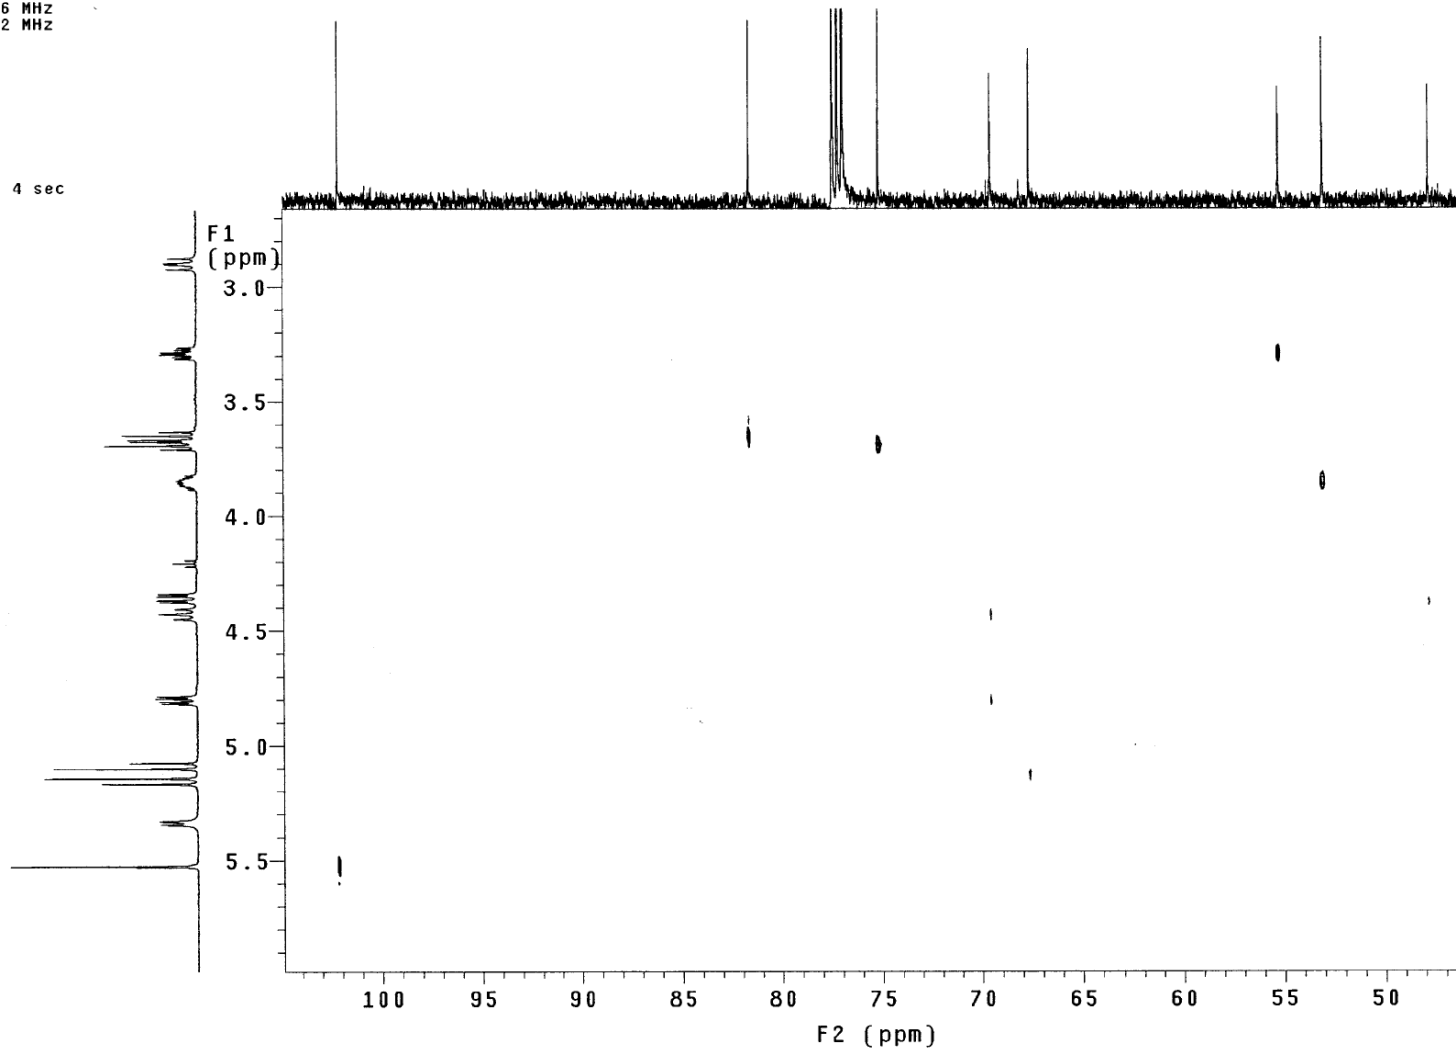

CH3 carbons

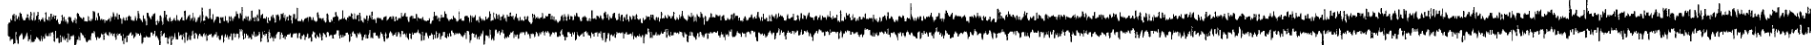

CH2 carbons

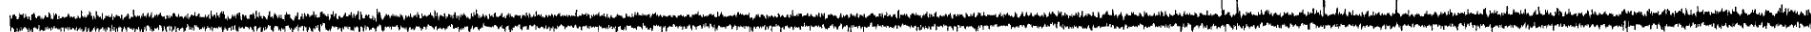

CH carbons

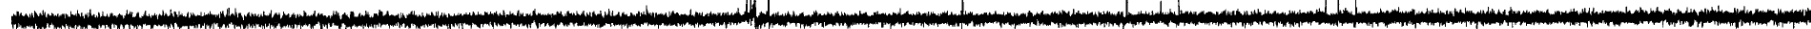

all protonated carbons

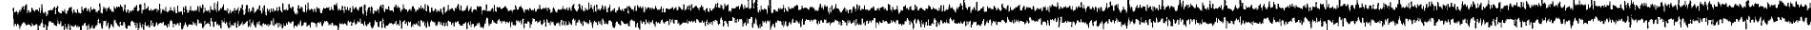

200 180 160 140 120 100 80 60 40 20 ppm



TY2-298

exp1 s2pu1

```
SAMPLE          DEC. & VT
date Feb 20 2009 dfrq          499.864
solvent CDC13      dn          H1
file      exp      dpwr         30
ACQUISITION      dof          0
sfrq      499.864 dm           nnn
tn         H1 dmm            c
at         5.016 dmf          200
np         65536 dseq
sw         6533.3 dres        1.0
fb         4000 homo         n
bs         4      DEC2
tpwr       61 dfrq2         0
pw         13.5 dn2
d1         0.100 dpwr2       1
tof        269.9 dof2       0
nt         32 dm2           n
ct         32 dmm2          c
alock      n dmf2          200
gain      not used dseq2     1.0
          FLAGS dres2      n
          il n homo2
          in n      DEC3
          dp y dfrq3       0
          hs nn dn3
          DISPLAY dpwr3    1
          sp -94.2 dof3     0
          wp 5090.8 dm3     n
          vs 23 dmm3       c
          sc 0 dmf3       200
          wc 250 dseq3
          hzmm 20.36 dres3   1.0
          is 233.40 homo3   n
          rfl 4140.3 PROCESSING
          rfp 3634.0 wtf file
          th 25 proc      ft
          ins 3.000 fn      65536
          ai ph math      f
          werr
          wexp process plH
          wbs
          wnt wft
```

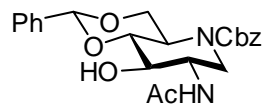

7

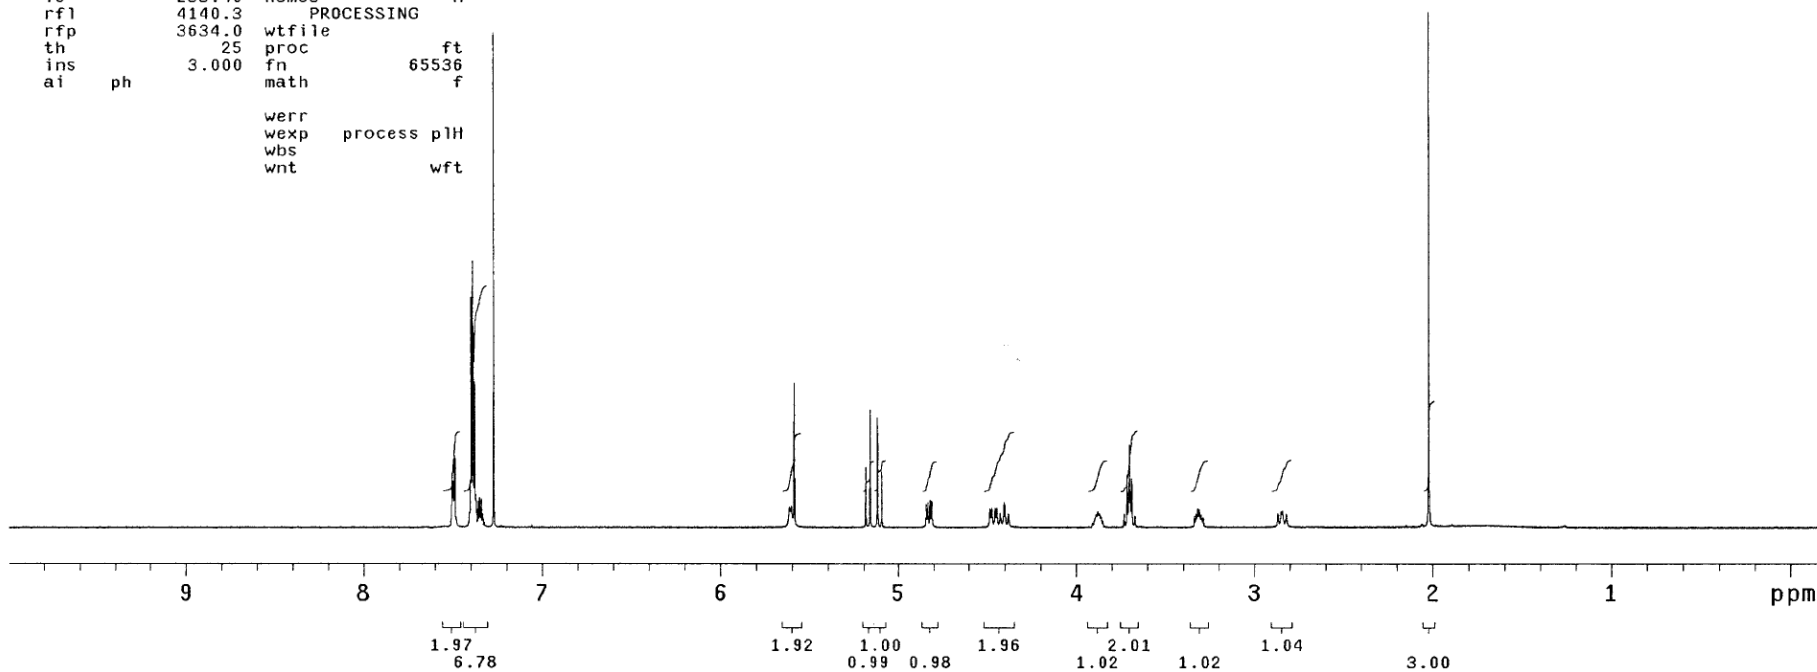

TY2-298

exp2 s2pu1

```
SAMPLE          DEC. & VT
date Feb 21 2009 dfrq      499.864
solvent CDC13    dn        H1
file      exp    dpwr      40
ACQUISITION     dof        0
sfrq      125.702 dm        yyy
tn         C13    dmm        w
at         1.215 dmf      8787.35
np         65536 dseq
sw         26963.3 dres      1.0
fb         15000 homo      n
bs         4      DEC2
tpwr       52    dfrq2     0
pw         10.2 dn2
d1         1.800 dpwr2     1
tof        144.5 dof2     0
nt         5000 dm2      n
ct         178   dmm2     c
alock      n     dmf2     10000
gain      not used dseq2
FLAGS      n     homo2     1.0
il         n     DEC3
in         n     dfrq3     0
dp         y     dn3
hs         nn    dpwr3     1
DISPLAY     dof3     0
sp        -1403.5 dm3      n
wp        26962.9 dmm3     c
vs         441   dmf3     10000
sc         0     dseq3
wc         250   dres3     1.0
hzmm       107.85 homo3     n
is         500.00
rfl        11111.0 PROCESSING
rfp        9707.1 lb        1.00
th         5     wtfile
ins        100.000 proc      ft
ai cdc ph    fn        131072
math       f
```

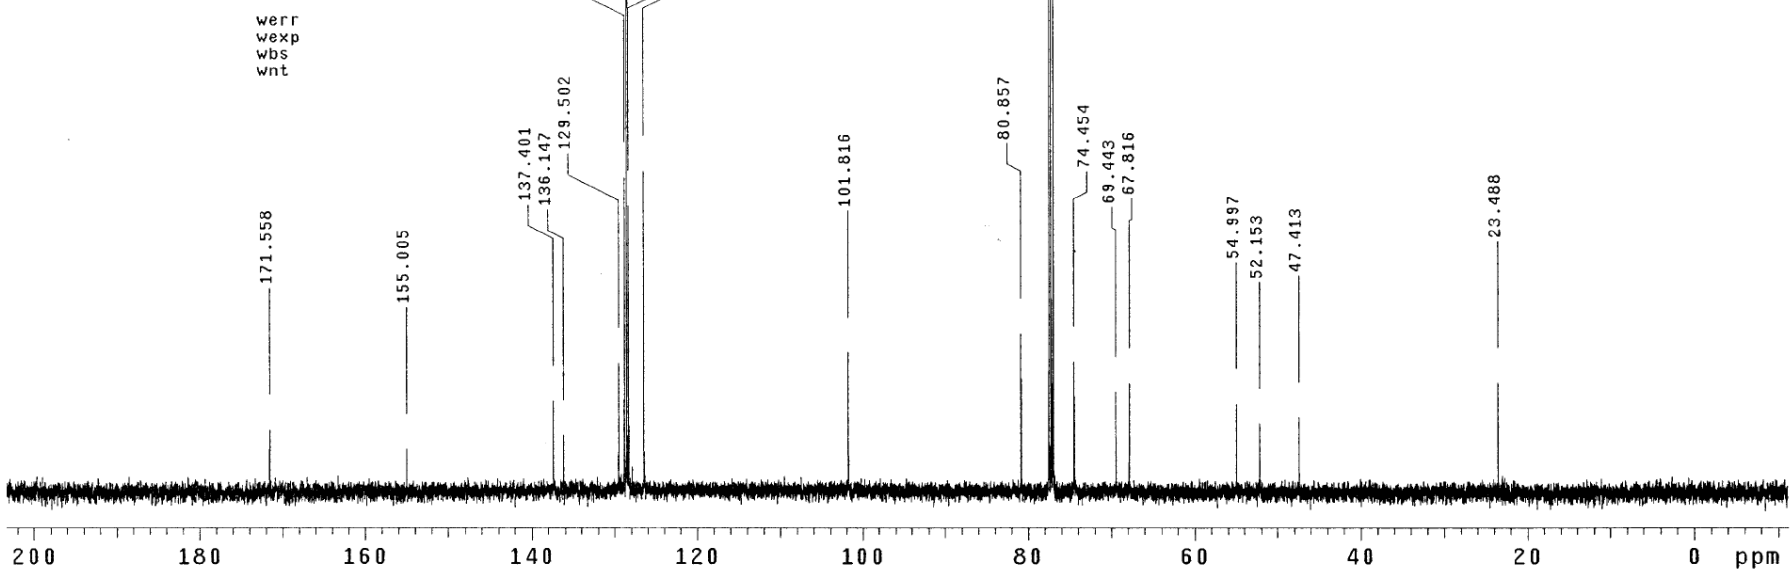

TY2-298

Pulse Sequence: relayh

Solvent: CDCl3  
Ambient temperature  
INOVA-500 "nmr2a.chem.nd.edu"

Relax. delay 1.300 sec  
COSY 90-90  
Acq. time 0.157 sec  
Width 6533.3 Hz  
2D Width 6533.3 Hz  
32 repetitions  
256 increments  
OBSERVE H1, 499.8611709 MHz  
DATA PROCESSING  
Sine bell 0.078 sec  
F1 DATA PROCESSING  
Sine bell 0.039 sec  
FT size 2048 x 2048  
Total time 3 hr, 23 min, 10 sec

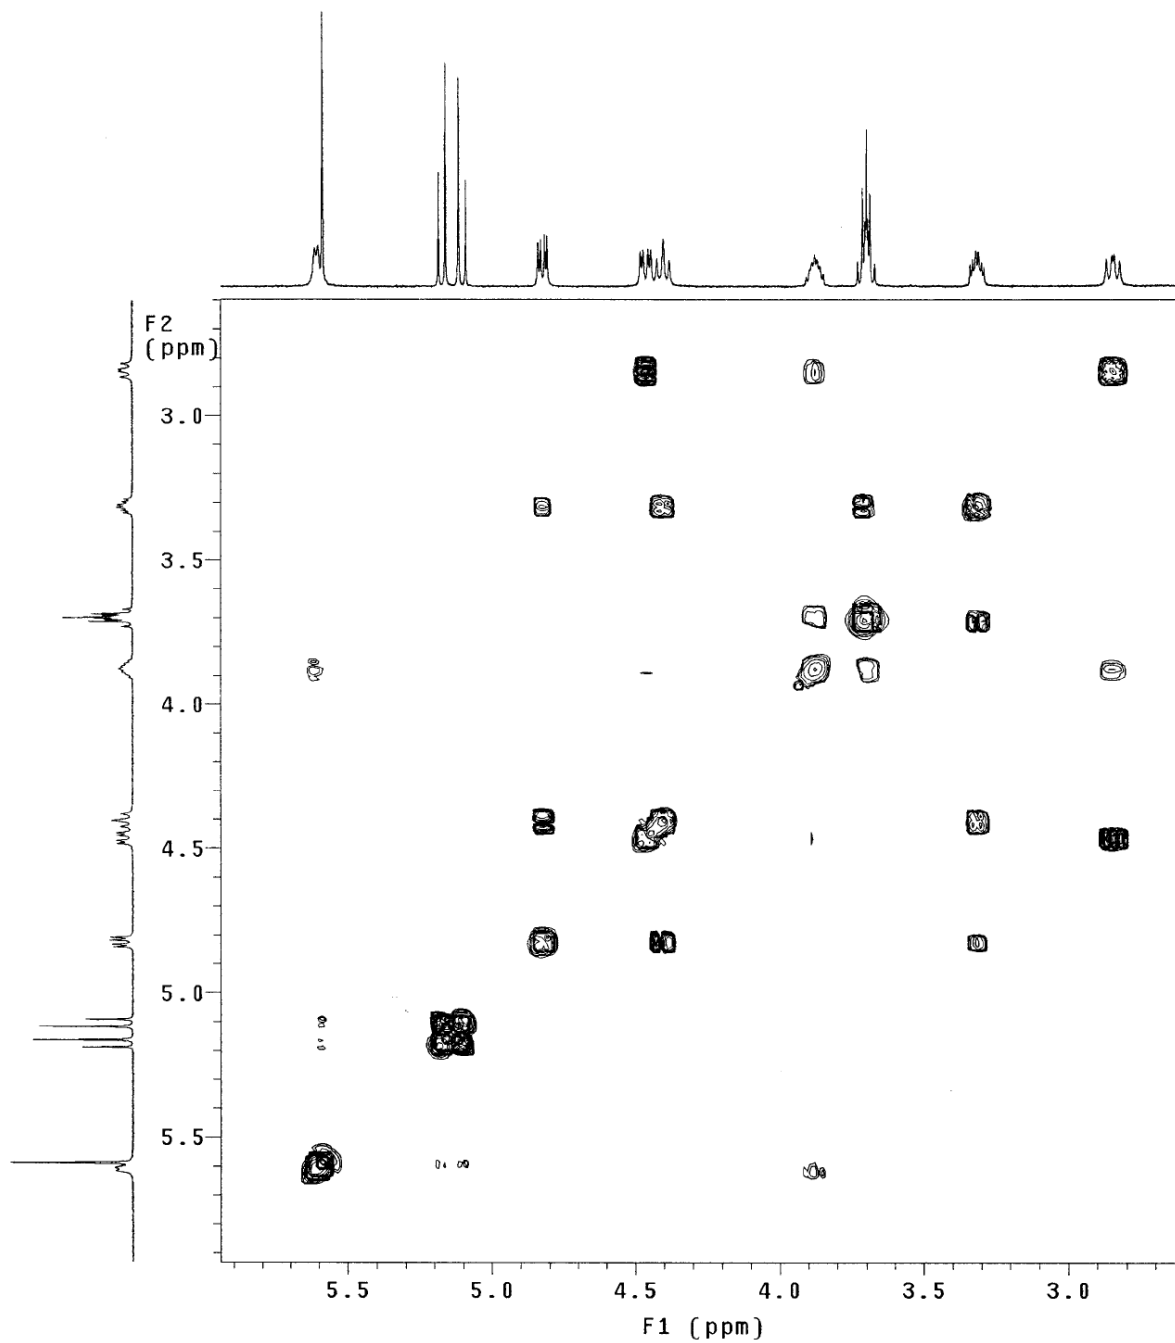

TY2-298

Pulse Sequence: hetcor

Solvent: CDC13

Ambient temperature

User: 1-14-87

INOVA-500 "nmr2a.chem.nd.edu"

Relax. delay 1.500 sec

Acq. time 0.111 sec

Width 18403.5 Hz

2D Width 6533.3 Hz

128 repetitions

256 increments

OBSERVE C13, 125.6901591 MHz

DECOUPLE H1, 499.8639312 MHz

Power 40 dB

on during acquisition

off during delay

WALTZ-16 modulated

DATA PROCESSING

Line broadening 1.0 Hz

F1 DATA PROCESSING

Line broadening 0.3 Hz

FT size 4096 x 1024

Total time 15 hr, 4 min, 2 sec

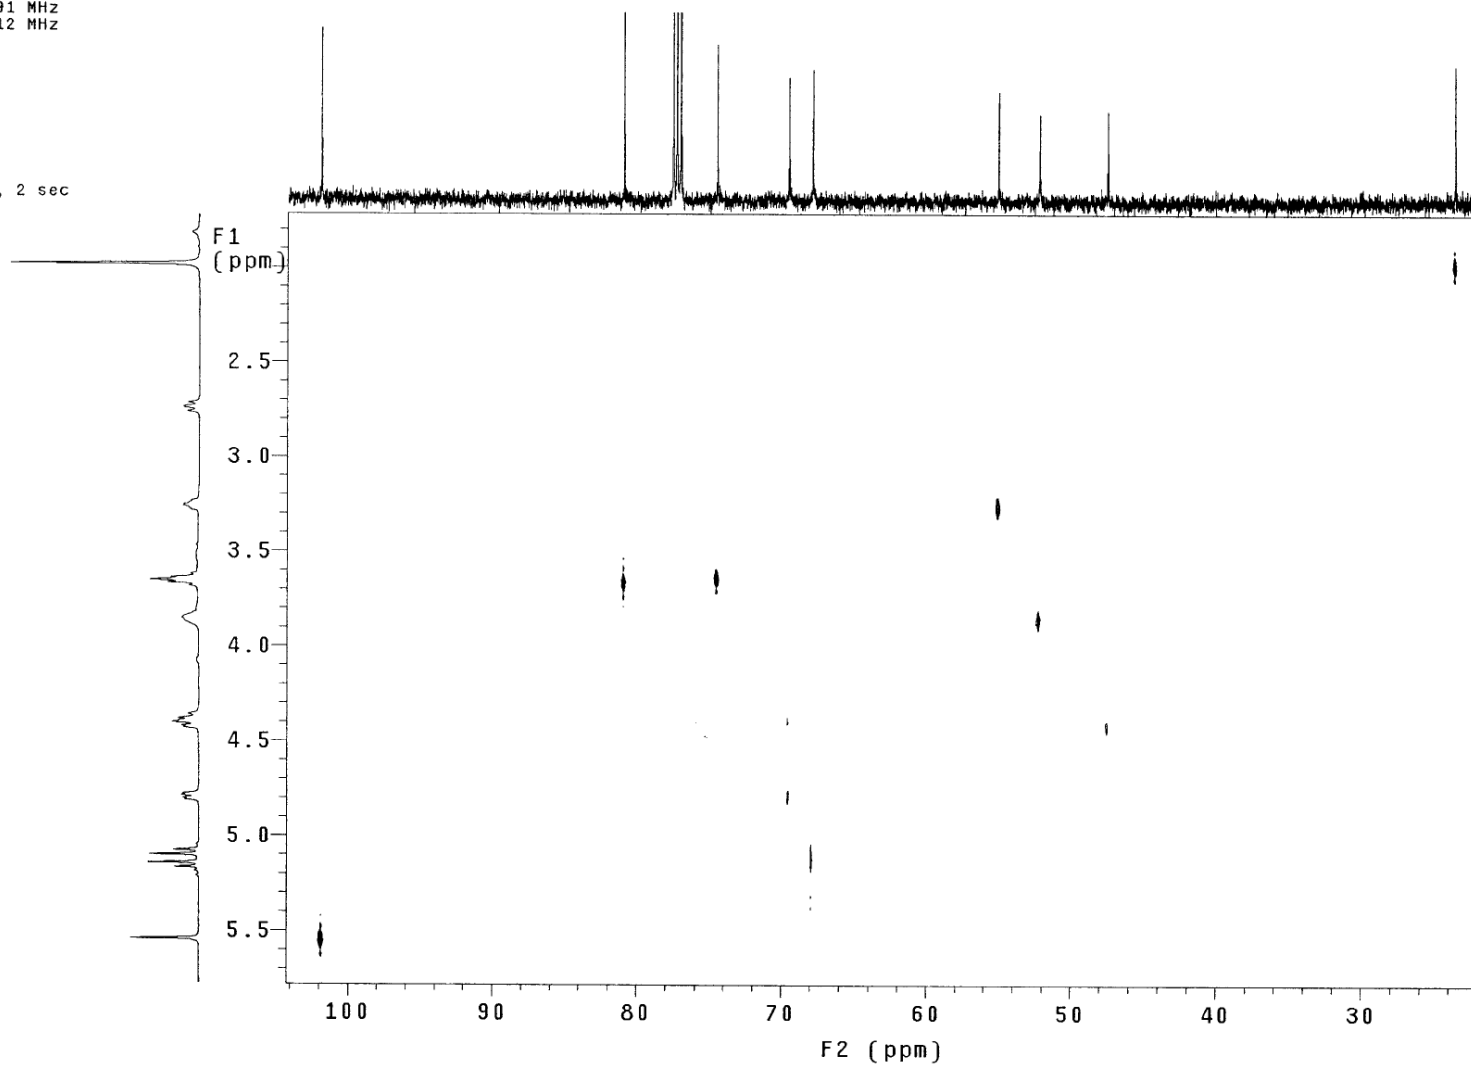

CH3 carbons

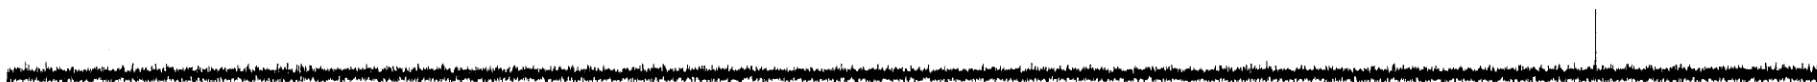

CH2 carbons

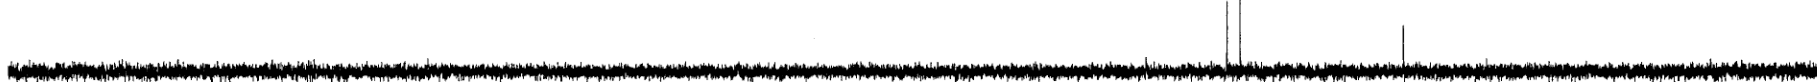

CH carbons

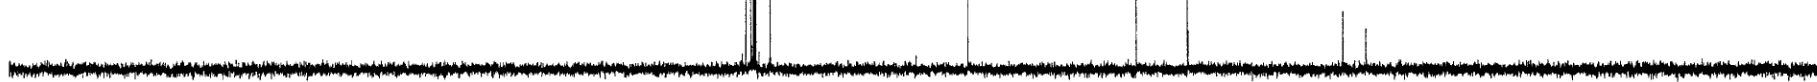

all protonated carbons

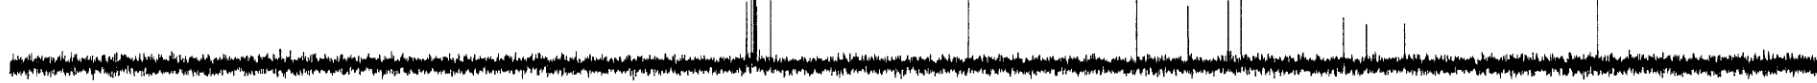

200 180 160 140 120 100 80 60 40 20 ppm

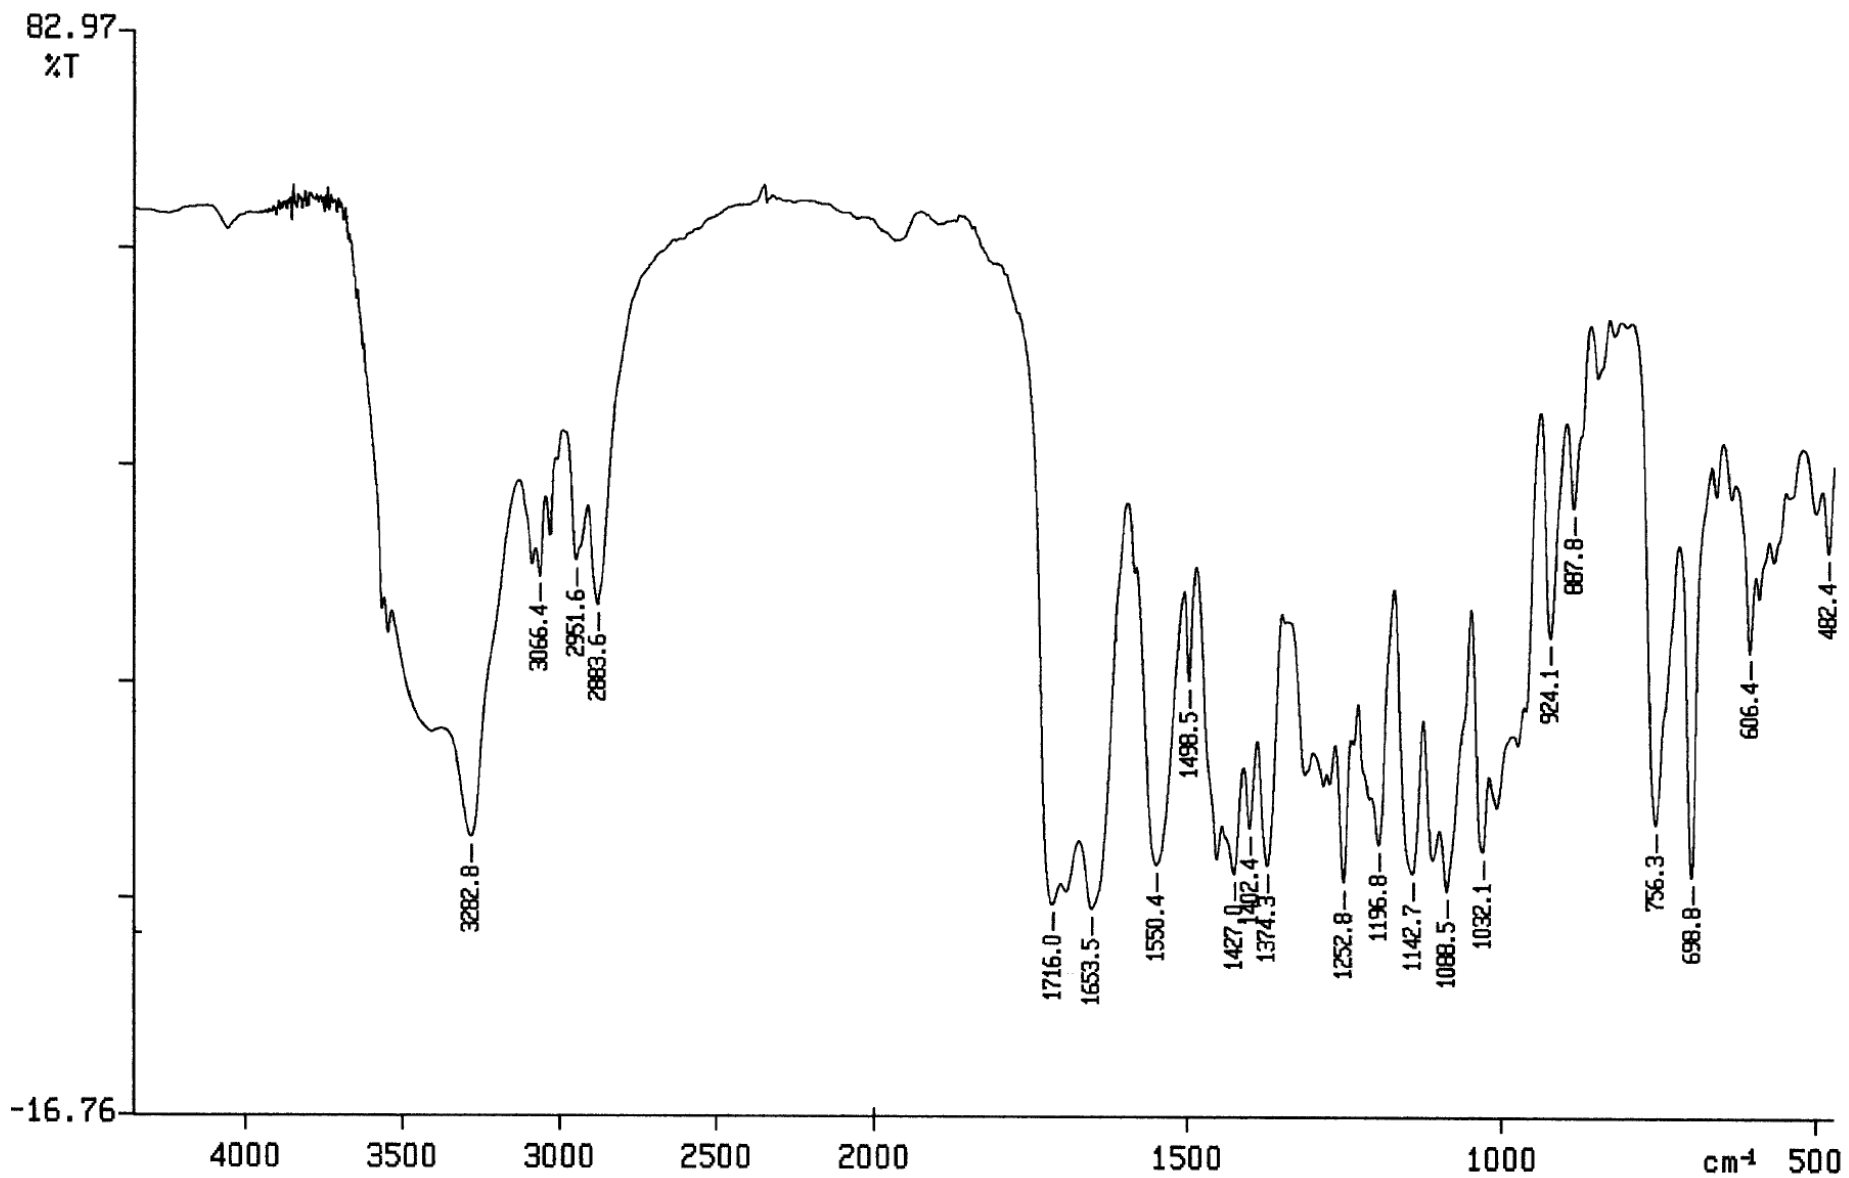

TY2-308

exp1 s2pu1

```
SAMPLE      DEC. & VT
date Mar 15 2009 dfrq 499.864
solvent CDC13 dn H1
file exp dpwr 30
ACQUISITION dof 0
sfrq 499.864 dm nnn
tn H1 dmm c
at 5.016 dmf 200
np 65536 dseq
sw 6533.3 dres 1.0
fb 4000 homo n
bs 4 DEC2
tpwr 61 dfrq2 0
pw 13.5 dn2
d1 0.100 dpwr2 1
tof 269.9 dof2 0
nt 32 dm2 n
ct 32 dmm2 c
alock n dmf2 200
gain not used dseq2
FLAGS n dres2 1.0
il n homo2 n
in n DEC3
dp y dfrq3 0
hs nn dn3
DISPLAY dpwr3 1
sp -102.8 dof3 0
wp 5107.9 dm3 n
vs 63 dmm3 c
sc 0 dmf3 200
wc 250 dseq3
hzmm 20.43 dres3 1.0
is 204.17 homo3 n
rfl 4140.3 PROCESSING
rfp 3634.0 wtfile
th 0 proc ft
ins 3.000 fn 65536
ai ph math f
```

```
werr
wexp process pH
wbs
wnt wft
```

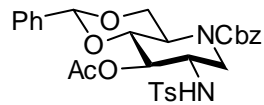

15

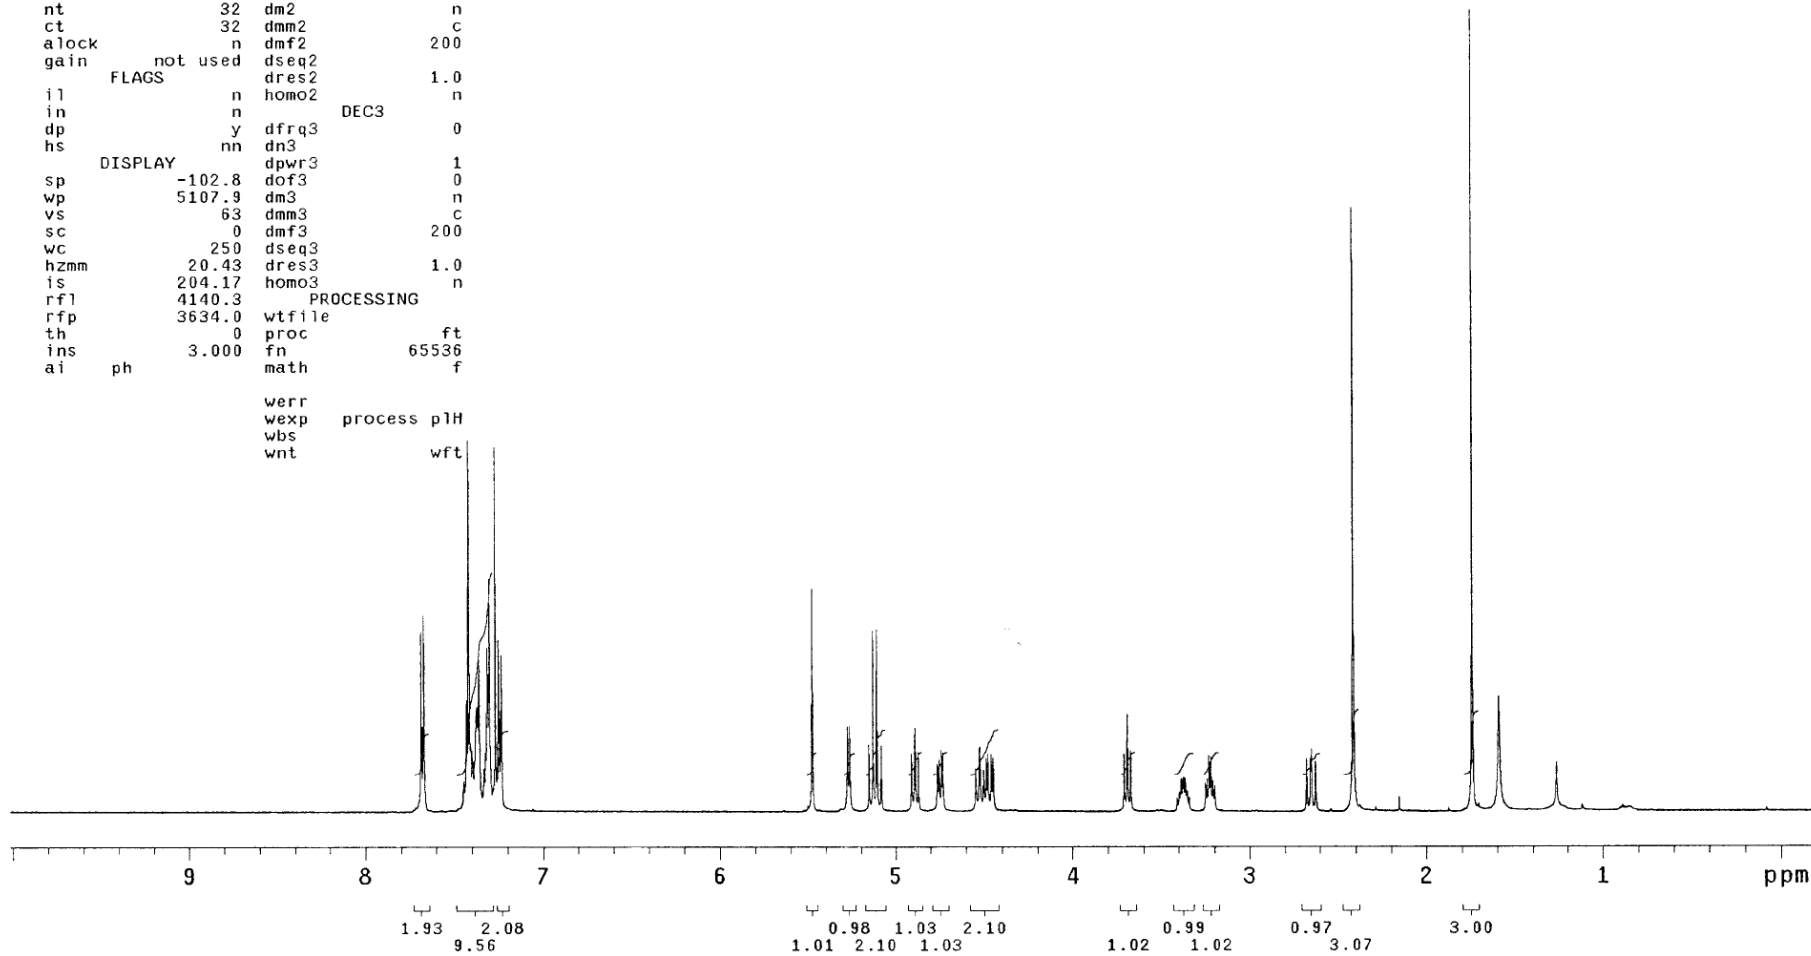

TY2-308

exp2 s2pu1

```
SAMPLE          DEC. & VT
date Mar 15 2009 dfrq      499.864
solvent CDC13     dn       H1
file      exp    dpwr     40
ACQUISITION     dof      0
sfrq    125.702 dm       yyy
tn       C13     dmm      w
at       1.215 dmf     8787.35
np       65536 dseq
sw       26963.3 dres    1.0
fb       15000 homo     n
bs       4      DEC2
tpwr     52     dfrq2    0
pw       10.2  dn2
d1       1.800 dpwr2    1
tof      144.5 dof2     0
nt       5000 dm2      n
ct       637  dmm2     c
alock    n      dmf2    10000
gain     not used dseq2
FLAGS      n homo2    1.0
in        n      DEC3
dp        y      dfrq3    0
hs        nn     dn3
DISPLAY   dpwr3    1
sp      -1400.6 dof3     0
wp      26962.9 dm3      n
vs       801   dmm3     c
sc       0     dmf3    10000
wc       250  dseq3
hzmm     107.85 dres3   1.0
is       500.00 homo3   n
rfl      11108.1 lb
rfp      9707.1  wtfile  1.00
th        4     proc    ft
ins      100.000 fn      131072
ai cdc ph      math    f
werr
wexp
wbs
wnt
```

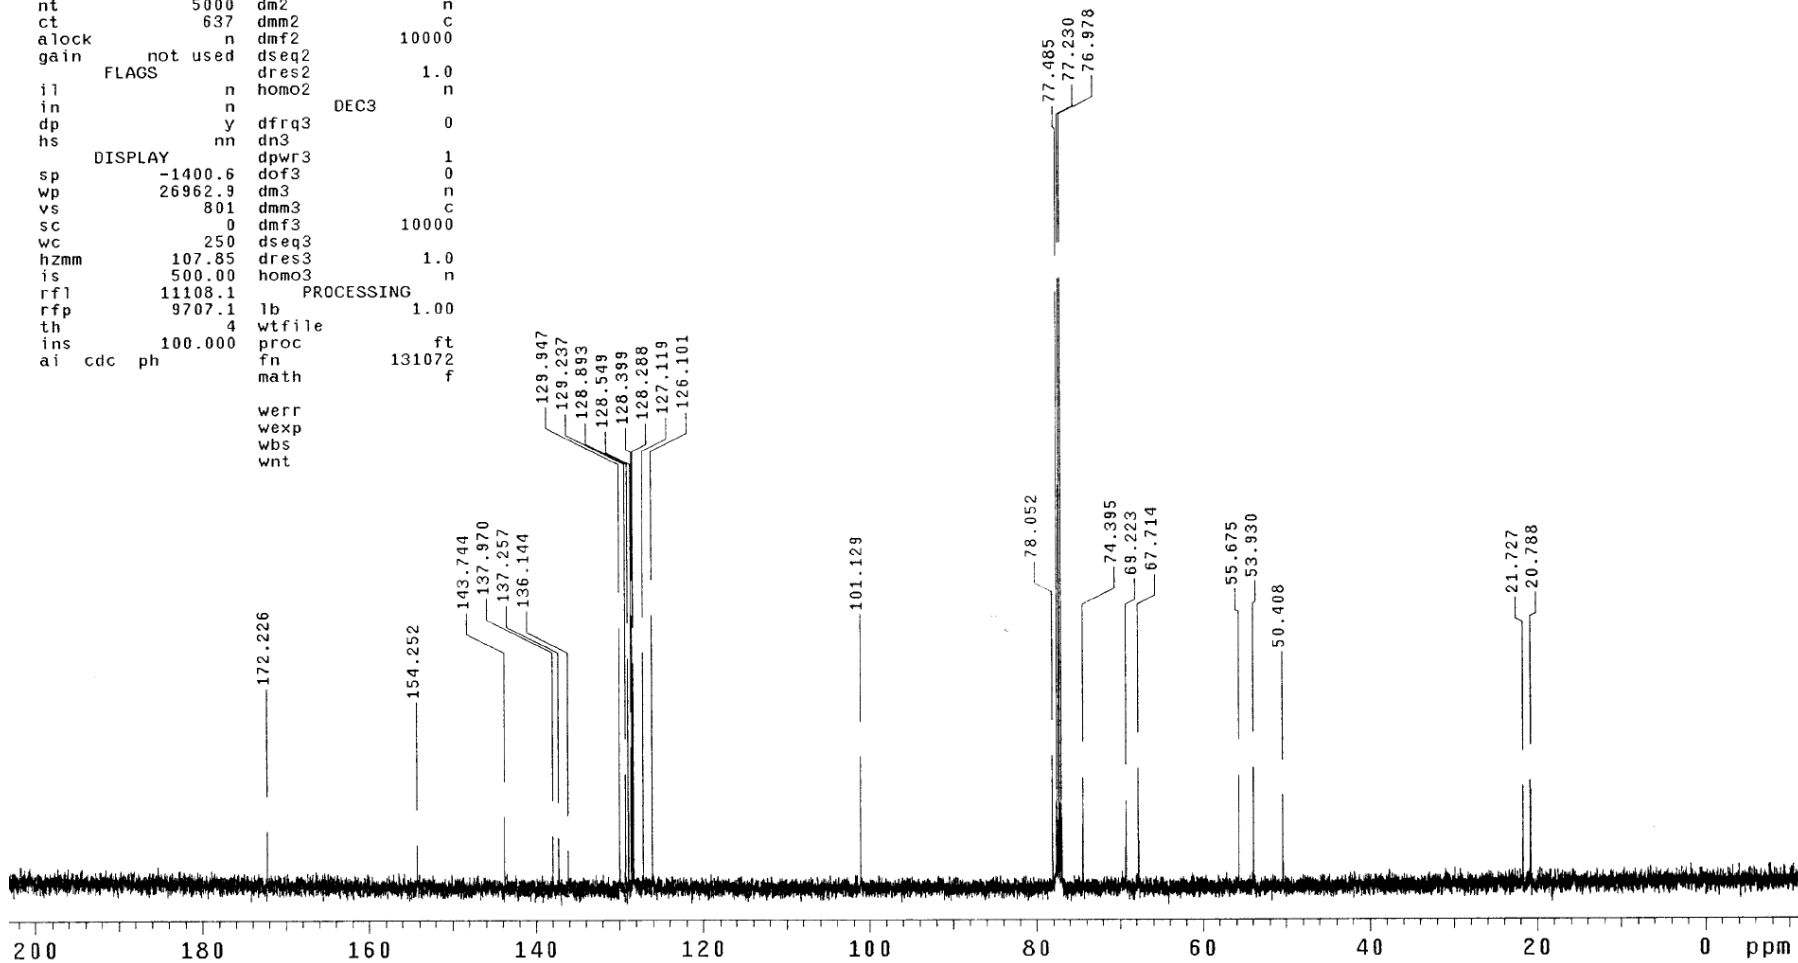



TY2-308

Pulse Sequence: relayh

Solvent: CDC13

Ambient temperature

INOVA-500 "nmr2a.chem.nd.edu"

Relax. delay 1.300 sec

COSY 90-90

Acq. time 0.157 sec

Width 6533.3 Hz

2D Width 6533.3 Hz

64 repetitions

256 increments

OBSERVE H1, 499.8611709 MHz

DATA PROCESSING

Sine bell 0.078 sec

F1 DATA PROCESSING

Sine bell 0.039 sec

FT size 2048 x 2048

Total time 6 hr, 46 min, 8 sec

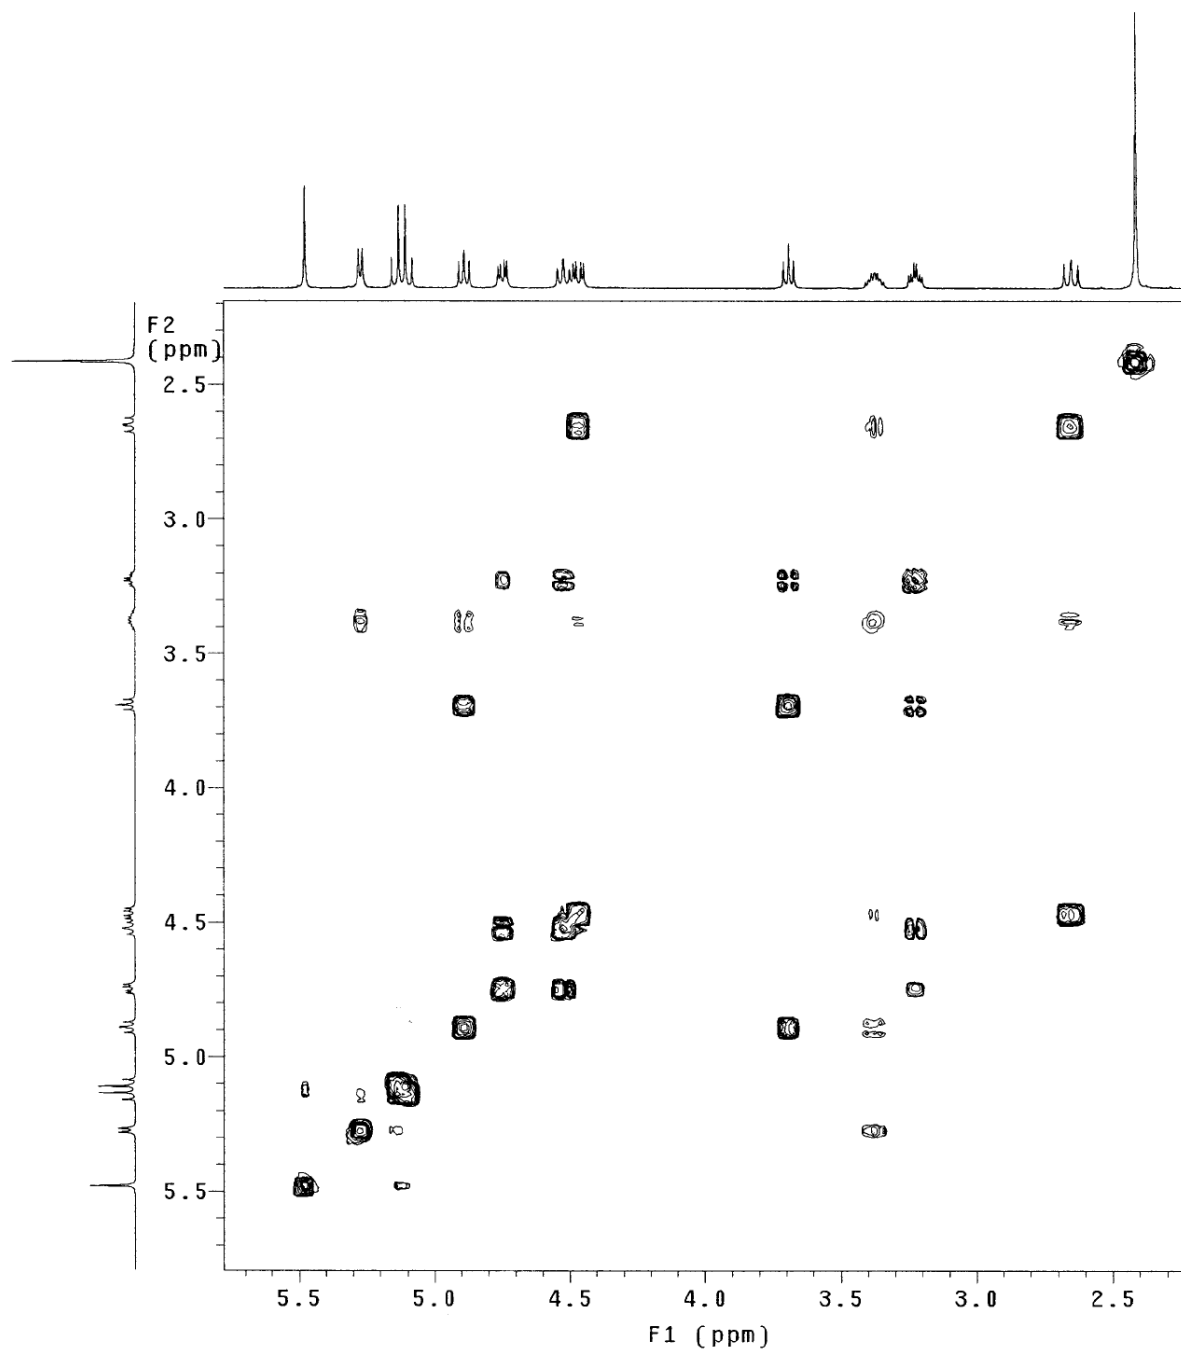

TY2-308

Pulse Sequence: hetcor

Solvent: CDC13  
Ambient temperature  
User: 1-14-87  
File: TY2-308-CH  
INOVA-500 "nmr2a.chem.nd.edu"

Relax. delay 1.500 sec  
Acq. time 0.111 sec  
Width 18403.5 Hz  
2D Width 6533.3 Hz  
64 repetitions  
256 increments  
OBSERVE C13, 125.6901652 MHz  
DECOUPLE H1, 499.8639312 MHz  
Power 40 dB  
on during acquisition  
off during delay  
WALTZ-16 modulated  
DATA PROCESSING  
Line broadening 1.0 Hz  
F1 DATA PROCESSING  
Line broadening 0.3 Hz  
FT size 4096 x 1024  
Total time 7 hr, 32 min, 4 sec

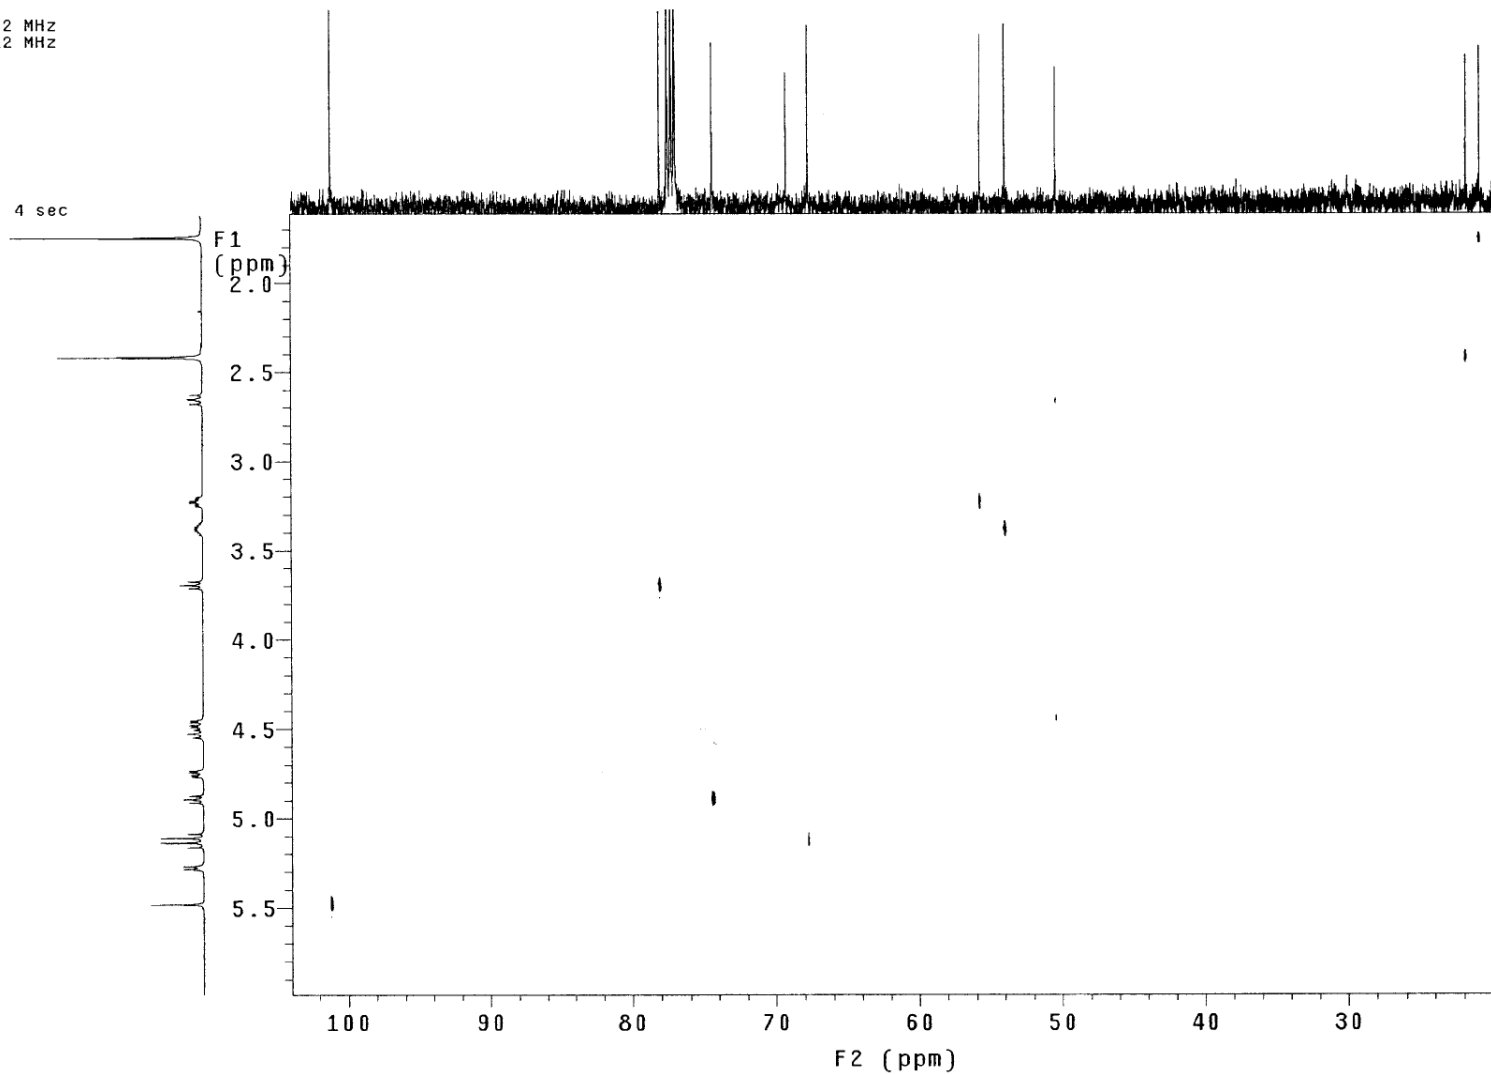

CH3 carbons

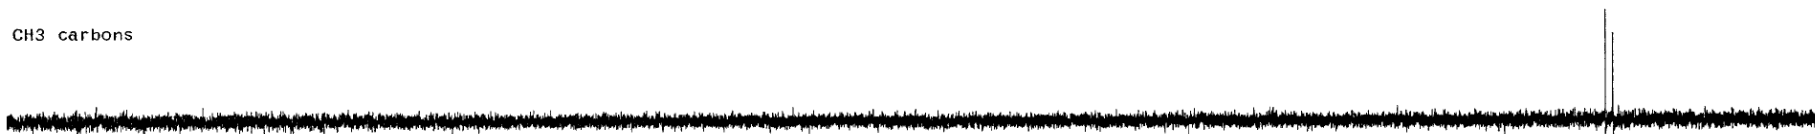

CH2 carbons

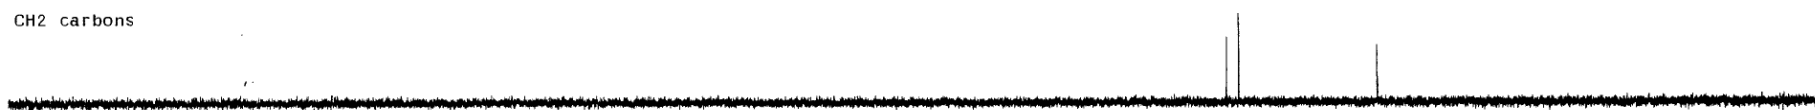

CH carbons

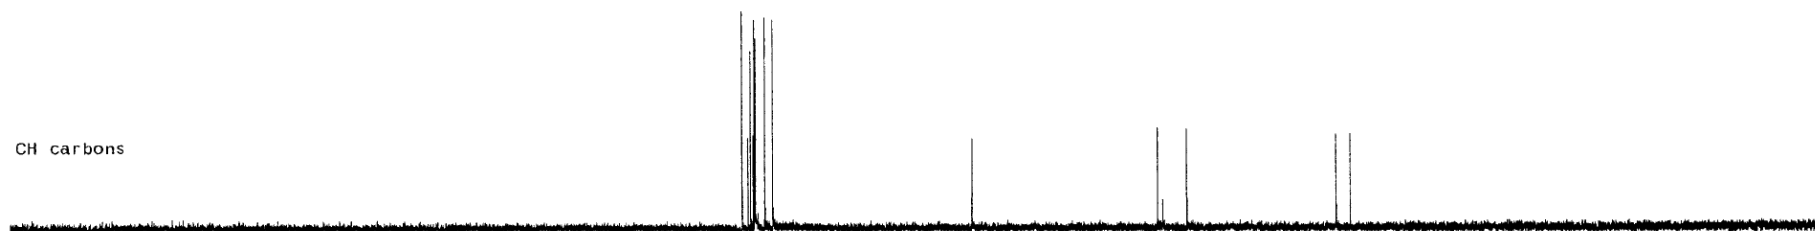

all protonated carbons

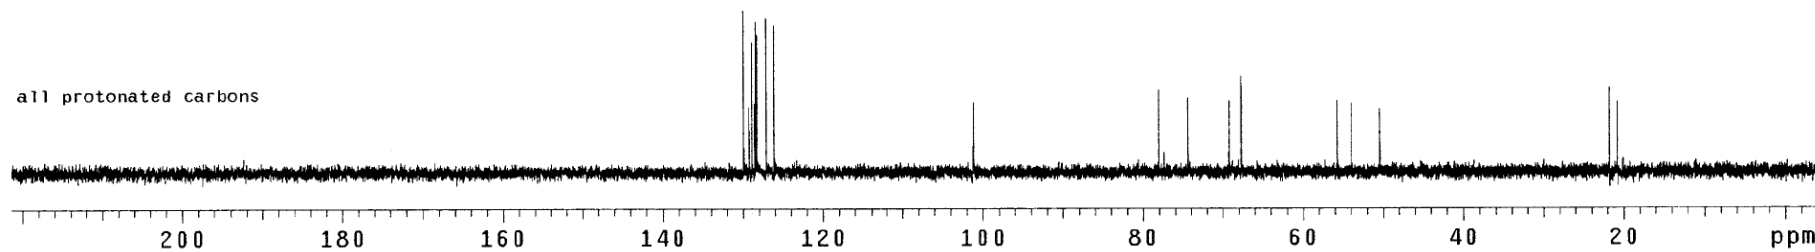

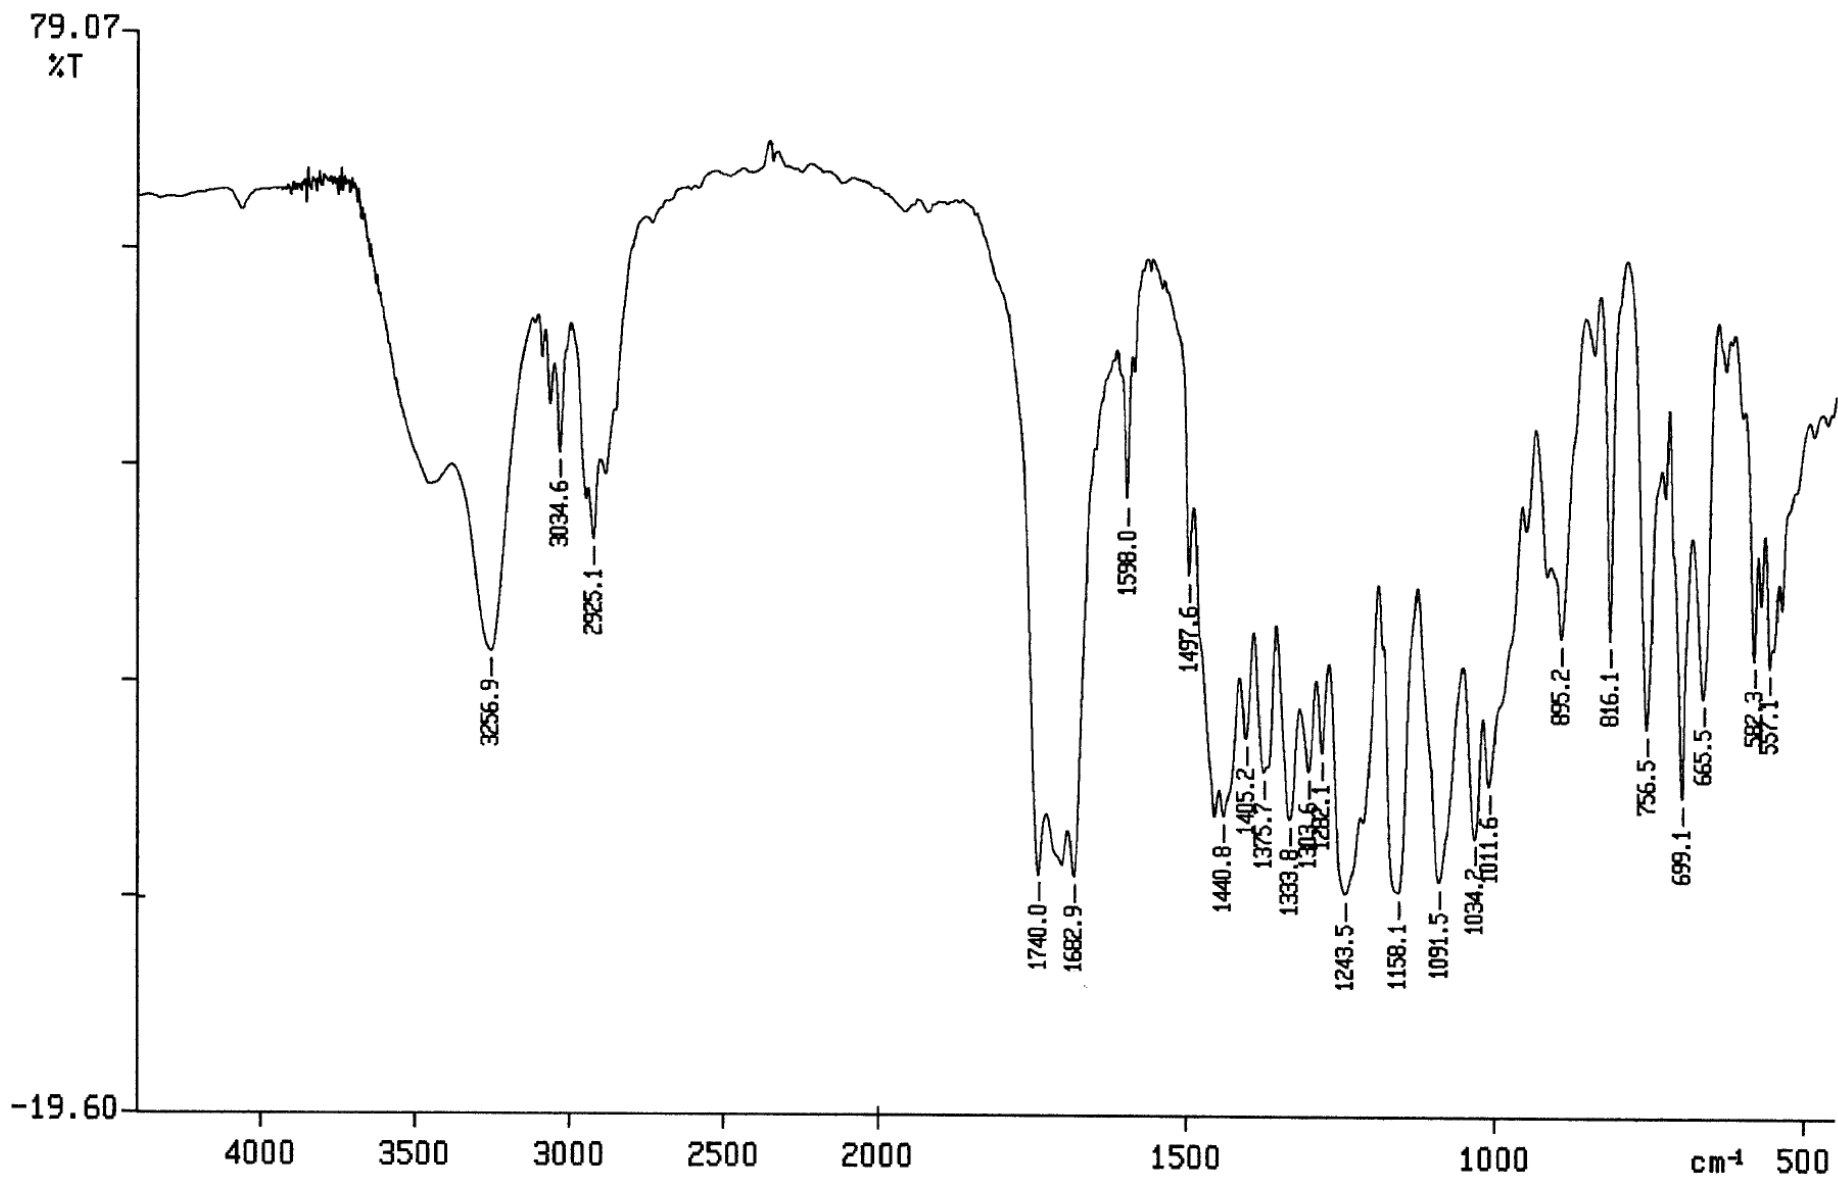

TY2-352

exp1 s2pu1

|         |             |            |            |
|---------|-------------|------------|------------|
|         | SAMPLE      | DEC. & VT  |            |
| date    | May 19 2009 | dfrq       | 499.865    |
| solvent | D2O         | dn         | H1         |
| file    | exp         | dpwr       | 30         |
|         | ACQUISITION | dof        | 0          |
| sfrq    | 499.865     | dm         | nnn        |
| tn      | H1          | dmm        | c          |
| at      | 5.016       | dmf        | 200        |
| np      | 65536       | dseq       |            |
| sw      | 6533.3      | dres       | 1.0        |
| fb      | 4000        | homo       | n          |
| bs      | 4           | DEC2       |            |
| tpwr    | 61          | dfrq2      | 0          |
| pw      | 13.5        | dn2        |            |
| d1      | 0.100       | dpwr2      | 1          |
| tof     | 269.9       | dof2       | 0          |
| nt      | 32          | dm2        | n          |
| ct      | 32          | dmm2       | c          |
| alock   | n           | dmf2       | 200        |
| gain    | not used    | dseq2      |            |
|         | FLAGS       | dres2      | 1.0        |
| il      | n           | homo2      | n          |
| in      | n           | DEC3       |            |
| dp      | y           | dfrq3      | 0          |
| hs      | nn          | dn3        |            |
|         | DISPLAY     | dpwr3      | 1          |
| sp      | -108.5      | dof3       | 0          |
| wp      | 5107.9      | dm3        | n          |
| vs      | 26          | dmm3       | c          |
| sc      | 0           | dmf3       | 200        |
| wc      | 250         | dseq3      |            |
| hzmm    | 20.43       | dres3      | 1.0        |
| is      | 111.76      | homo3      | n          |
| rfl     | 2825.6      | PROCESSING |            |
| rfp     | 2399.3      | wfile      |            |
| th      | 7           | proc       | ft         |
| ins     | 3.000       | fn         | 65536      |
| ai      | ph          | math       | f          |
|         |             | werr       |            |
|         |             | wexp       | process pH |
|         |             | wbs        |            |
|         |             | wnt        | wft        |

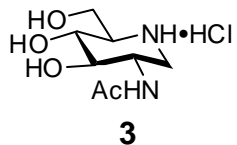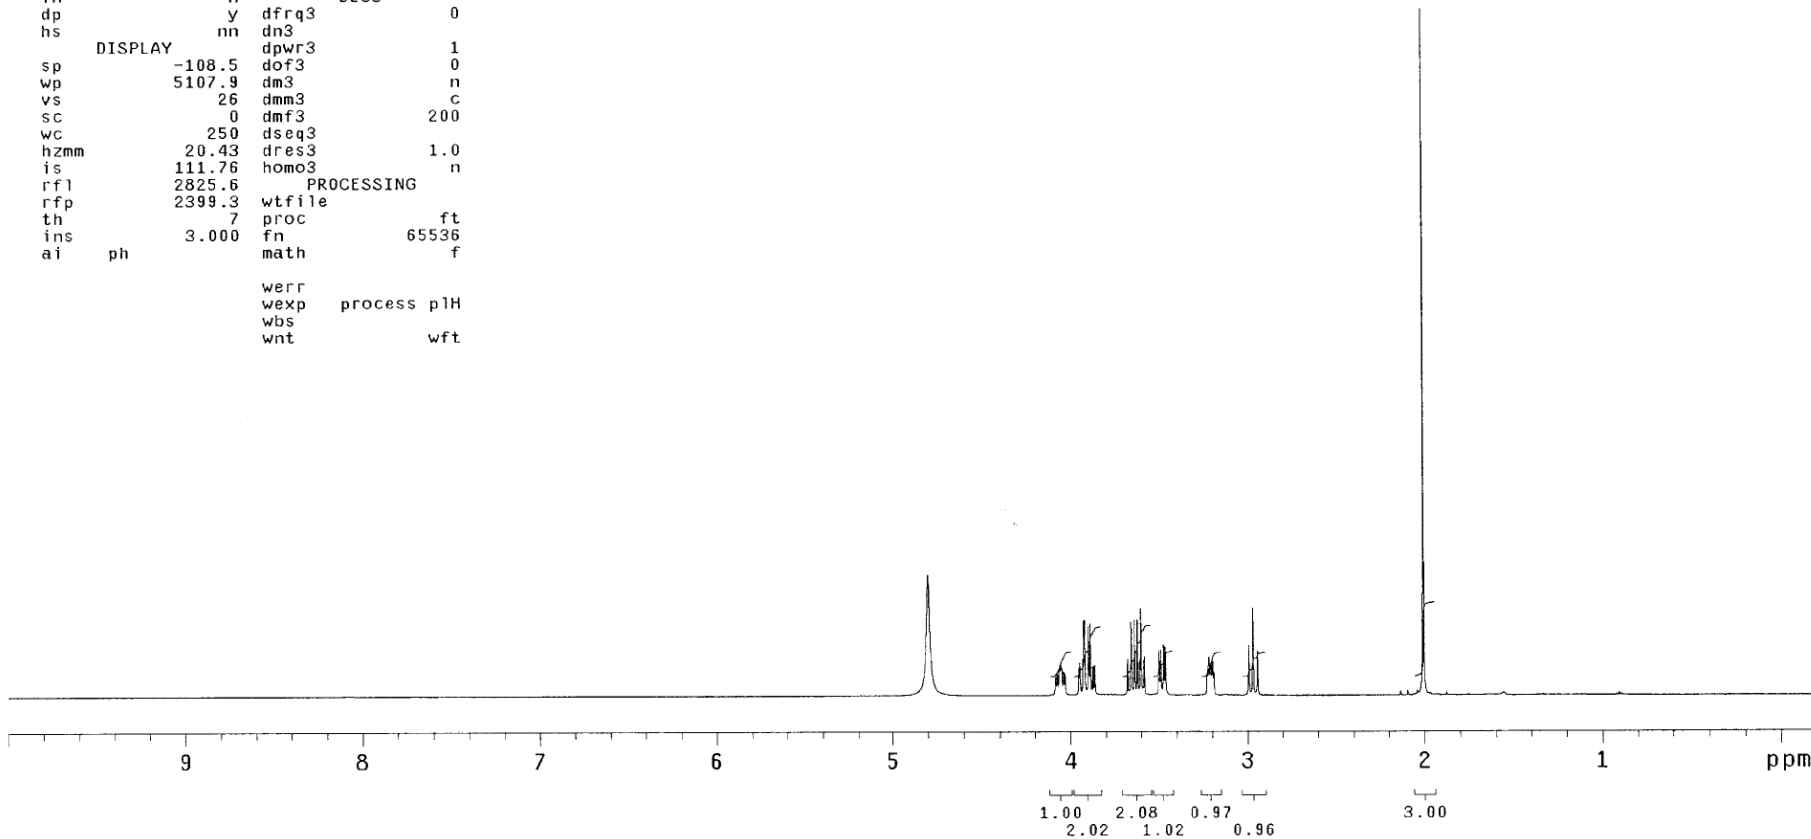

TY2-352

exp2 s2pu1

```

SAMPLE          DEC. & VT
date May 19 2009 dfrq      499.865
solvent 020      dn        H1
file    exp      dpwr      40
ACQUISITION    dof        0
sfrq    125.703 dm         yy
tn       C13      dmm       w
at       1.215   dmf       8787.35
np       65536   dseq
sw       26963.3 dres      1.0
fb       15000   homo      n
bs        4      DEC2
tpwr     52      dfrq2     0
pw       10.2   dn2
d1       1.800 dpwr2     1
tof      144.5 dof2     0
nt       5000  dm2      n
ct        96   dmm2     c
alock    n     dmf2     10000
gain    not used dseq2     1.0
        FLAGS   dres2     1.0
il      n     homo2     n
in      n     DEC3
dp      y     dfrq3     0
hs      nn    dn3
DISPLAY  dpwr3     1
sp      -1394.6 dof3     0
wp      26962.9 dm3      n
vs      242    dmm3     c
sc       0     dmf3     10000
wc       250   dseq3
hzmm    107.85 dres3     1.0
is      500.00 homo3     n
rfl     1395.0 PROCESSING
rfp     0      lb        1.00
th      4      wfile
ins    100.000 PROC
ai cdc ph     fn        131072
        math       f
        werr
        wexp
        wbs
        wnt

```

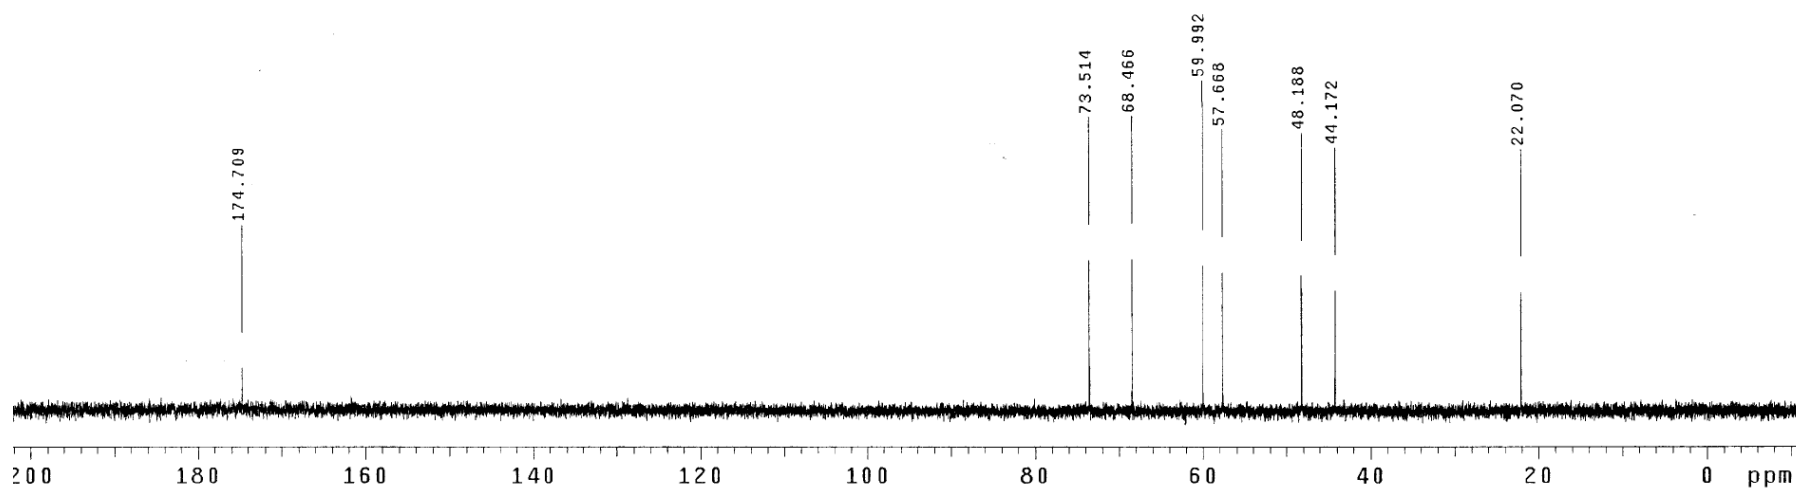

TY2-352

Pulse Sequence: relayh  
Solvent: D2O  
Ambient temperature  
INOVA-500 "nmr2a.chem.nd.edu"

Relax. delay 1.300 sec  
COSY 90-90  
Acq. time 0.157 sec  
Width 6533.3 Hz  
2D Width 6533.3 Hz  
32 repetitions  
256 increments  
OBSERVE H1, 499.8623759 MHz  
DATA PROCESSING  
Sine bell 0.078 sec  
F1 DATA PROCESSING  
Sine bell 0.039 sec  
FT size 2048 x 2048  
Total time 3 hr, 23 min, 10 sec

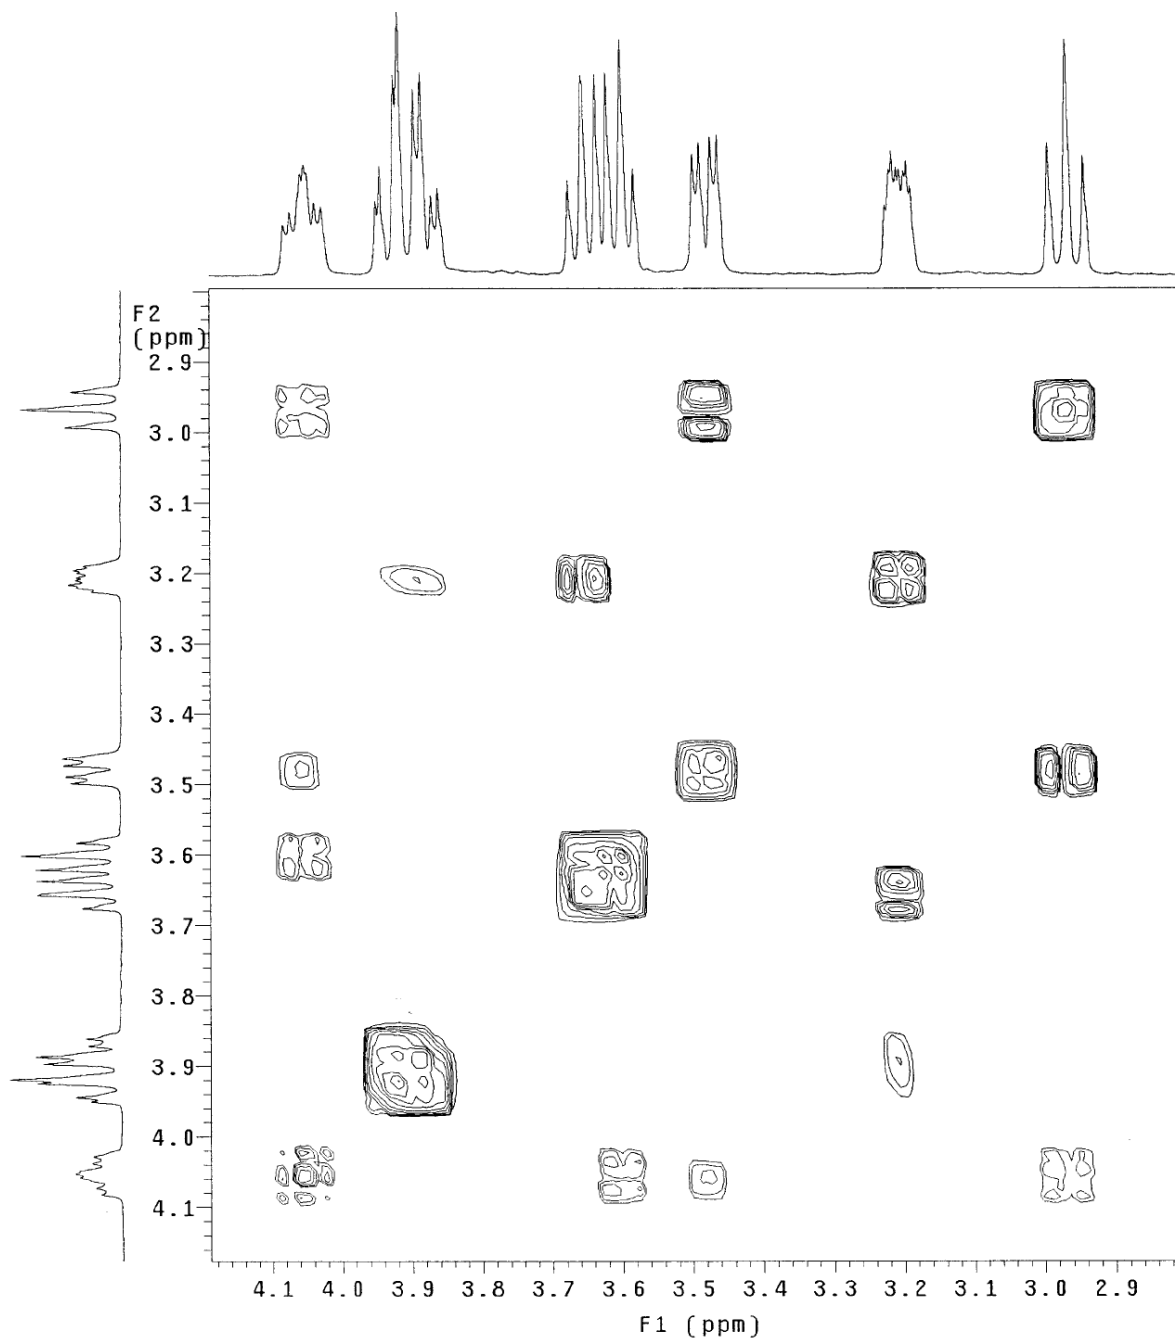

TY2-352

Pulse Sequence: hetcor

Solvent: D2O

Ambient temperature

User: 1-14-87

INOVA-500 "nmr2a.chem.nd.edu"

Relax. delay 1.500 sec

Acq. time 0.111 sec

Width 18403.5 Hz

2D Width 6533.3 Hz

32 repetitions

256 increments

OBSERVE C13, 125.6904822 MHz

DECOUPLE H1, 499.8652159 MHz

Power 40 dB

on during acquisition

off during delay

WALTZ-16 modulated

DATA PROCESSING

Line broadening 1.0 Hz

F1 DATA PROCESSING

Line broadening 0.3 Hz

FT size 4096 x 1024

Total time 3 hr, 46 min, 5 sec

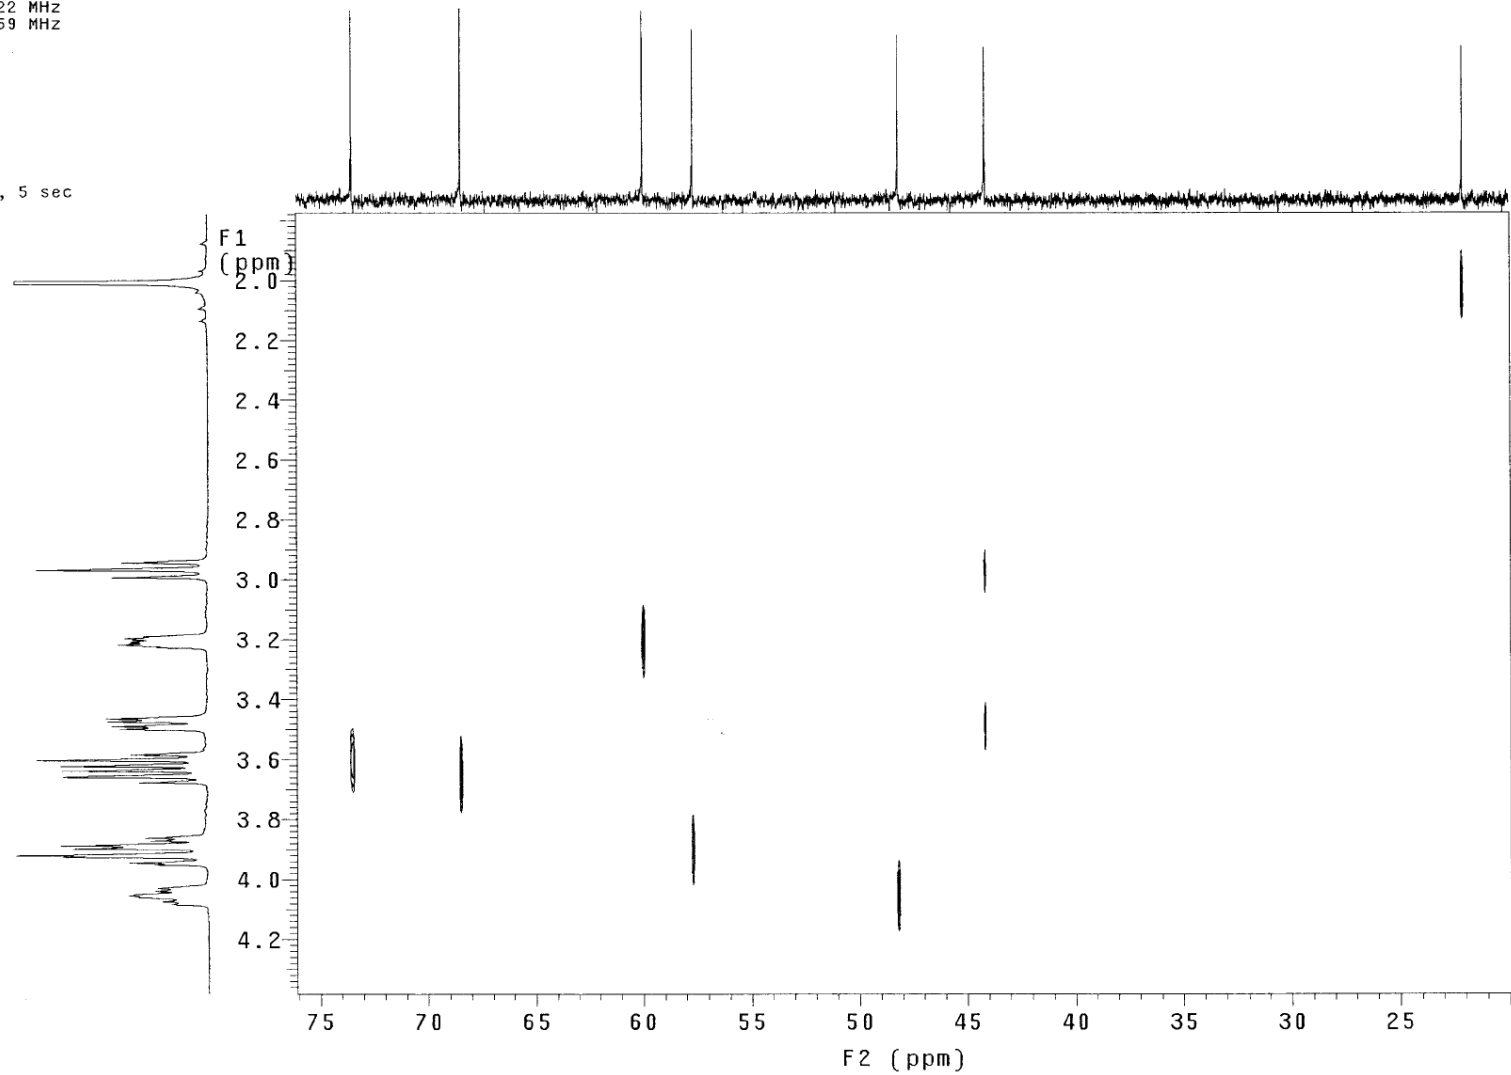



CH3 carbons

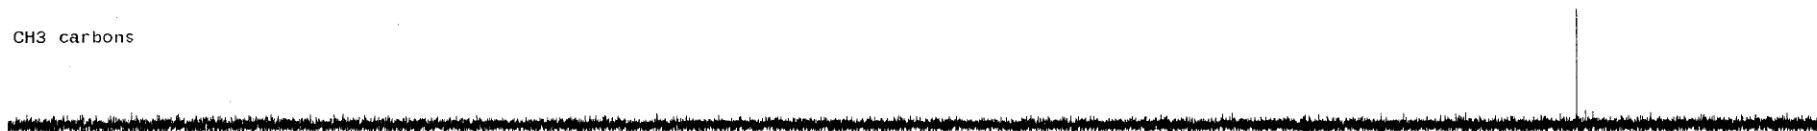

CH2 carbons

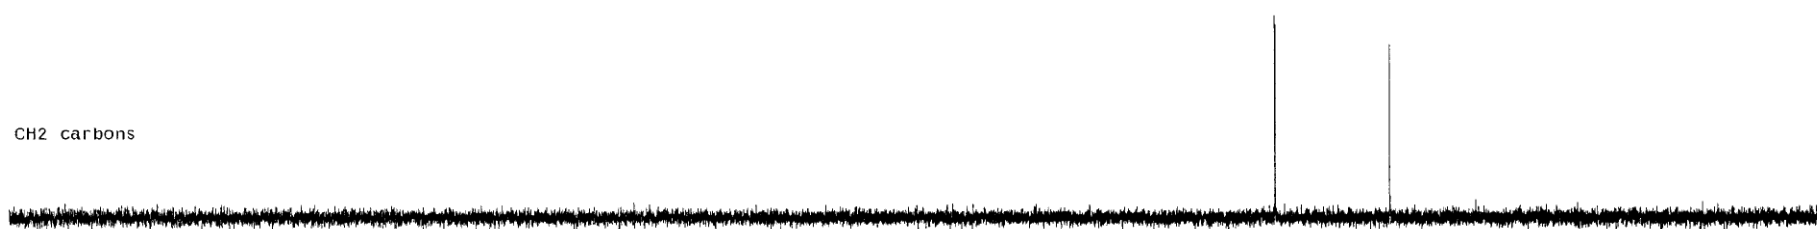

CH carbons

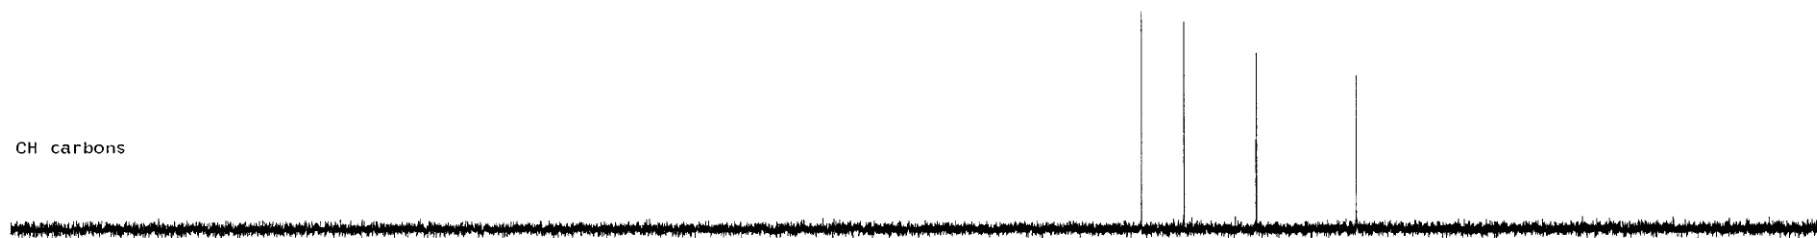

all protonated carbons

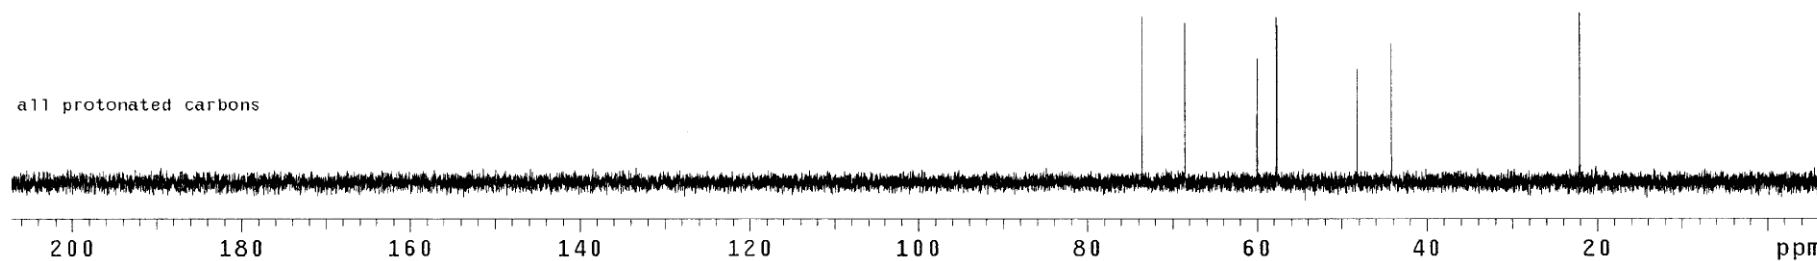

TY2-339

exp1 s2pu1

```
SAMPLE          DEC. & VT
date Apr 19 2009 dfrq          499.864
solvent CDC13      dn          H1
file      exp      dpwr         30
ACQUISITION      dof          0
sfrq          499.864 dm          nnn
tn            H1    dmm          c
at           5.016 dmf         200
np           65536 dseq
sw           6533.3 dres         1.0
fb           4000 homo          n
bs            4     DEC2
tpwr          61    dfrq2        0
pw           13.5 dn2
d1           0.100 dpwr2         1
tof          269.9 dof2         0
nt            16    dm2          n
ct            16    dmm2         c
alock         n     dmf2         200
gain      not used dseq2
FLAGS          n     dres2         1.0
il            n     homo2         n
in            n     DEC3
dp            y     dfrq3         0
hs            nn    dn3
DISPLAY        dpwr3         1
sp          -102.4 dof3         0
wp          5099.3 dm3          n
vs           50    dmm3         c
sc            0     dmf3         200
wc           250 dseq3
hzmm         20.40 dres3         1.0
is           50.63 homo3         n
rf1          497.4 PROCESSING
rfp            0 wtf file
th            50 proc          ft
ins          10.000 fn          65536
ai      ph      math          f

werr
wexp process pH
wbs
wnt wft
```

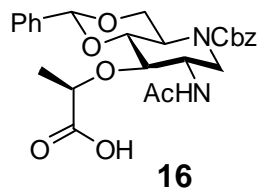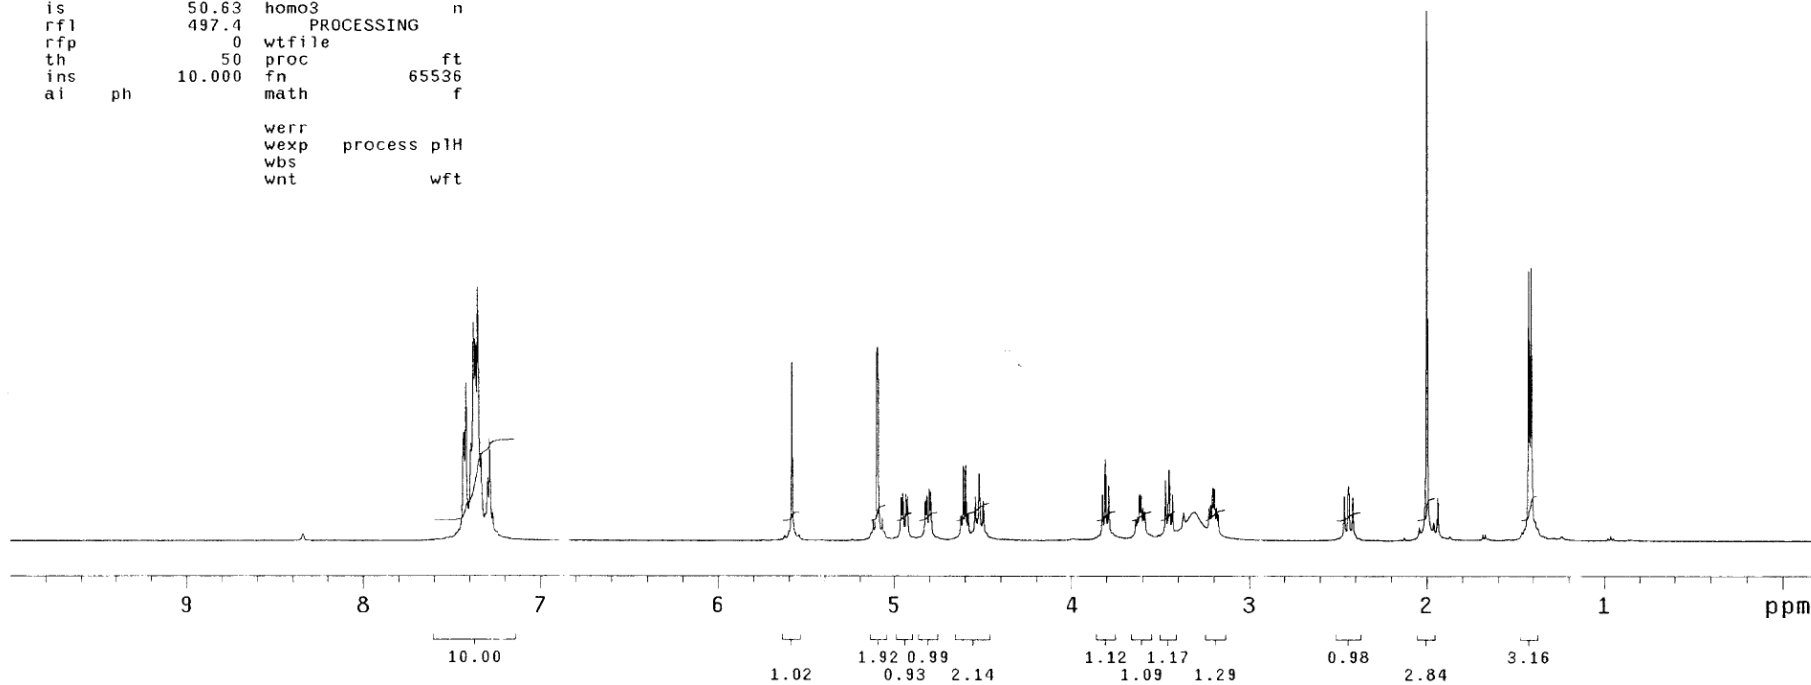

TY2-339

exp2 s2pu1

```
SAMPLE          DEC. & VT
date Apr 19 2009 dfrq      499.864
solvent CDC13      dn       H1
file      exp      dpwr     40
ACQUISITION     dof       0
sfrq      125.702  dm       yy
tn         C13      dmm      w
at         1.215   dmf      8787.35
np         65536   dseq
sw         26963.3 dres     1.0
fb         15000   homo     n
bs         4       DEC2
tpwr       52     dfrq2    0
pw         10.2   dn2
d1         1.800  dpwr2    1
tof        144.5  dof2     0
nt         5000   dm2      n
ct         264   dmm2     c
alock      n     dmf2    10000
gain      not used dseq2
FLAGS      n     homo2    1.0
il         n     DEC3
in         n     dfrq3    0
dp         y     dn3
hs         nn    dpwr3    1
DISPLAY    dof3    0
sp        -1408.1  dm3      n
wp        26962.9  dmm3     c
vs         283    dmf3    10000
sc         0     dseq3
wc         250   dres3    1.0
hzmm      107.85 homo3    n
is         500.00
rfl       11115.5 PROCESSING
rfp       9707.1  lb       not used
th         7     wtfile
ins       100.000 proc      ft
ai cdc ph      fn      131072
math      f
werr
wexp
wbs
wnt
```

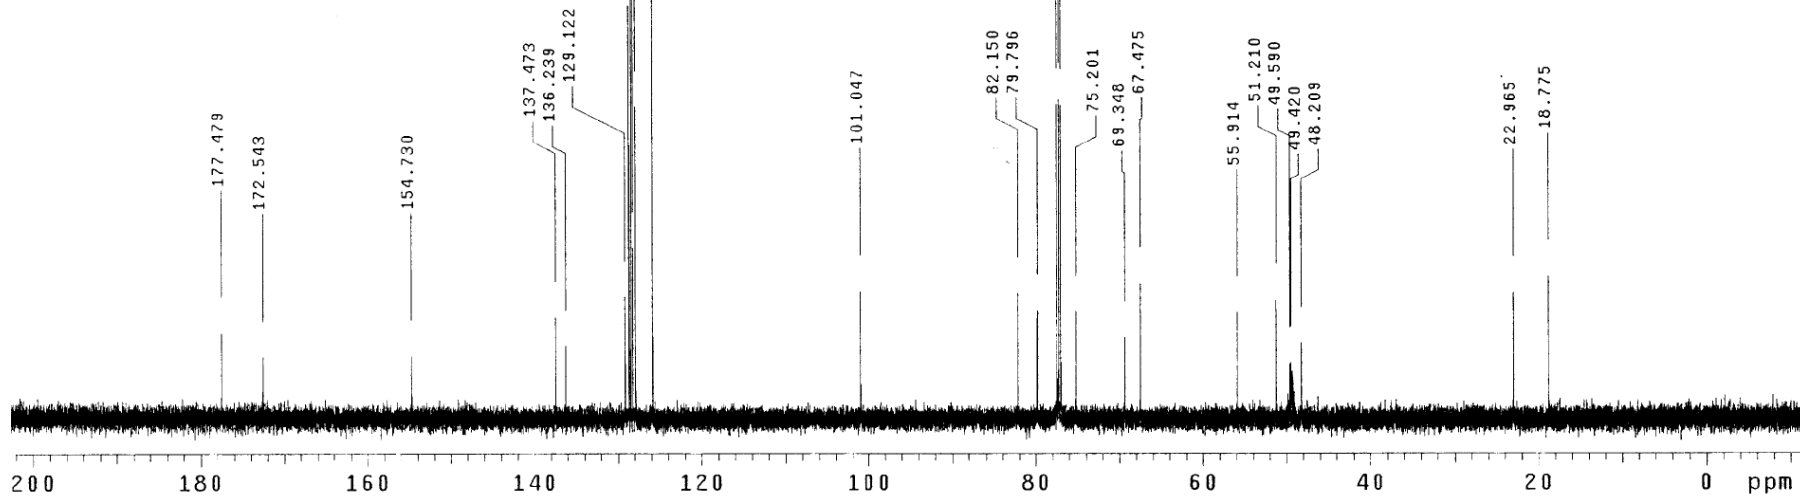

TY2-339

Pulse Sequence: relayh

Solvent: CDC13  
Ambient temperature  
INOVA-500 "nmr2a.chem.nd.edu"

Relax. delay 1.300 sec  
COSY 90-90  
Acq. time 0.157 sec  
Width 6533.3 Hz  
2D Width 6533.3 Hz  
32 repetitions  
256 increments  
OBSERVE H1, 499.8611619 MHz  
DATA PROCESSING  
Sine bell 0.078 sec  
F1 DATA PROCESSING  
Sine bell 0.039 sec  
FT size 2048 x 2048  
Total time 3 hr, 23 min, 10 sec

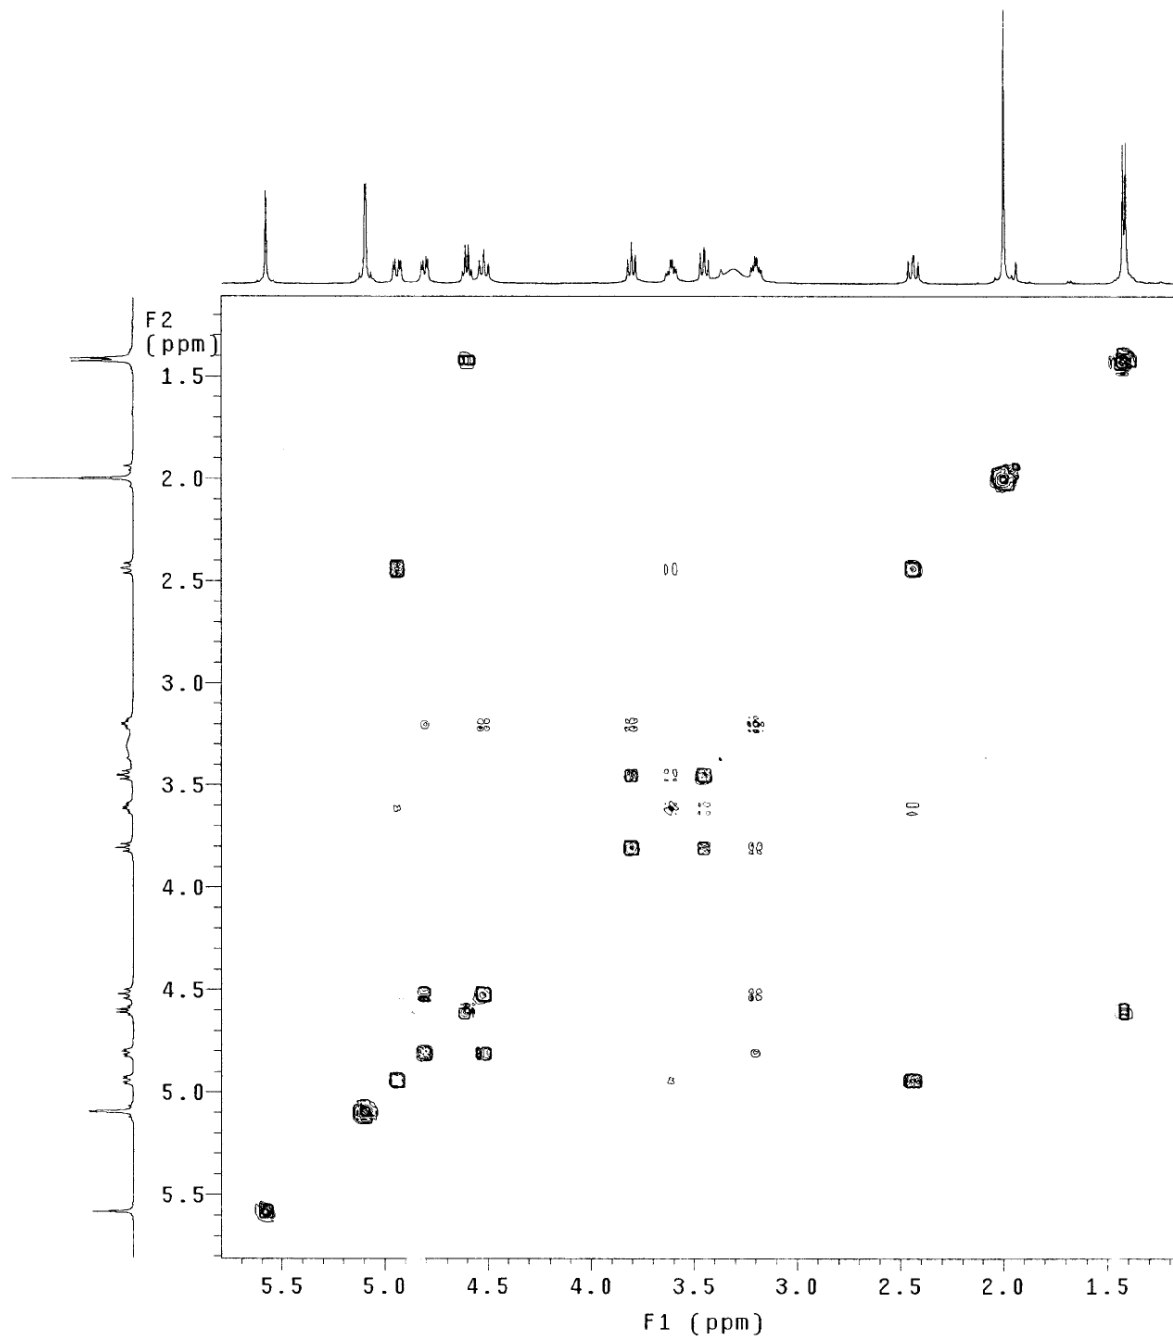

TY2-339

Pulse Sequence: hetcor

Solvent: CDCl3  
Ambient temperature  
User: 1-14-87  
INOVA-500 "nmr2a.chem.nd.edu"

Relax. delay 1.500 sec  
Acq. time 0.111 sec  
Width 18403.5 Hz  
2D Width 6533.3 Hz  
64 repetitions  
256 increments  
OBSERVE C13, 125.6901726 MHz  
DECOUPLE H1, 499.8639312 MHz  
Power 40 dB  
on during acquisition  
off during delay  
WALTZ-16 modulated  
DATA PROCESSING  
Line broadening 1.0 Hz  
F1 DATA PROCESSING  
Line broadening 0.3 Hz  
FT size 4096 x 1024  
Total time 7 hr, 32 min, 4 sec

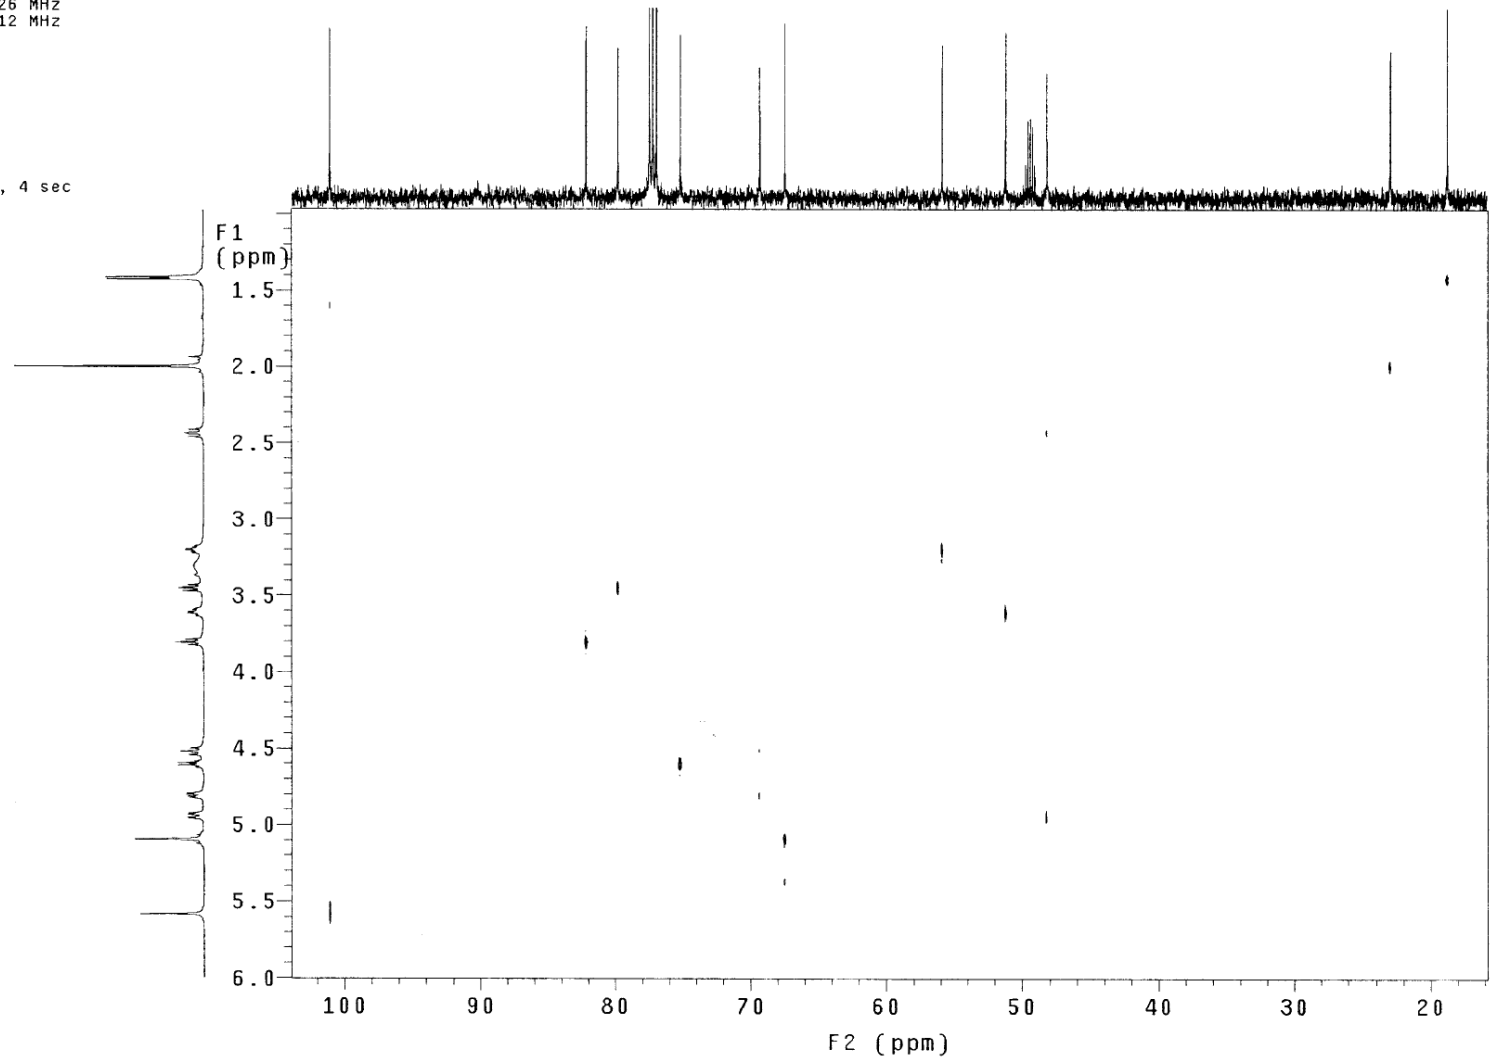

CH3 carbons

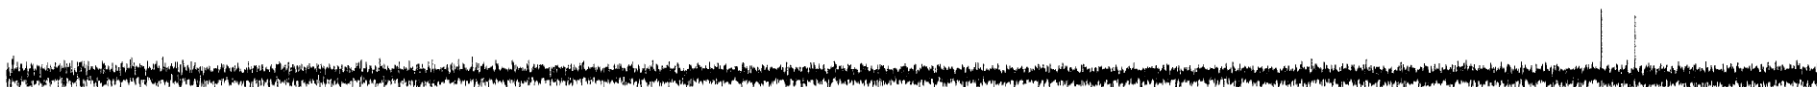

CH2 carbons

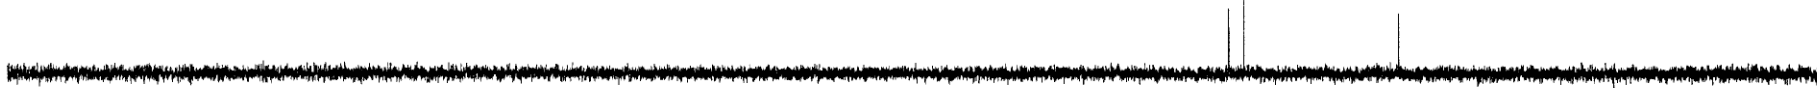

CH carbons

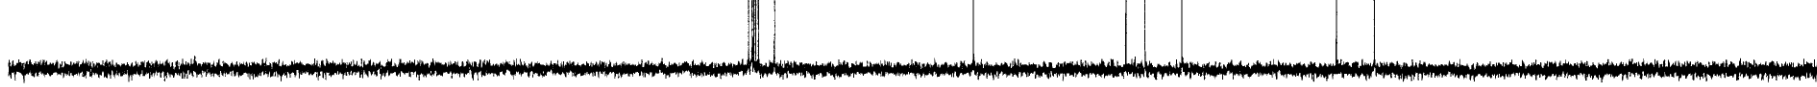

all protonated carbons

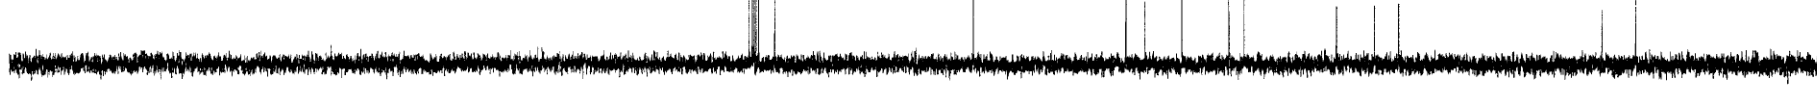

200 180 160 140 120 100 80 60 40 20 ppm

TY2-356

exp1 s2pu1

|             |             |            |            |
|-------------|-------------|------------|------------|
| SAMPLE      |             | DEC. & VT  |            |
| date        | May 23 2009 | dfrq       | 499.865    |
| solvent     | D2O         | dn         | H1         |
| file        | exp         | dpwr       | 30         |
| ACQUISITION |             | dof        | 0          |
| sfrq        | 499.865     | dm         | nnn        |
| tn          | H1          | dmm        | c          |
| at          | 5.016       | dmf        | 200        |
| np          | 65536       | dseq       |            |
| sw          | 6533.3      | dres       | 1.0        |
| fb          | 4000        | homo       | n          |
| bs          | 4           | DEC2       |            |
| tpwr        | 61          | dfrq2      | 0          |
| pw          | 13.5        | dn2        |            |
| d1          | 0.100       | dpwr2      | 1          |
| tof         | 269.9       | dof2       | 0          |
| nt          | 32          | dm2        | n          |
| ct          | 32          | dmm2       | c          |
| alock       | n           | dmf2       | 200        |
| gain        | not used    | dseq2      |            |
| FLAGS       |             | dres2      | 1.0        |
| il          | n           | homo2      | n          |
| in          | n           | DEC3       |            |
| dp          | y           | dfrq3      | 0          |
| hs          | nn          | dn3        |            |
| DISPLAY     |             | dpwr3      | 1          |
| sp          | -106.7      | dof3       | 0          |
| wp          | 5107.9      | dm3        | n          |
| vs          | 52          | dmm3       | c          |
| sc          | 0           | dmf3       | 200        |
| wc          | 250         | dseq3      |            |
| hzmm        | 20.43       | dres3      | 1.0        |
| is          | 205.33      | homo3      | n          |
| rfl         | 2832.4      | PROCESSING |            |
| rfp         | 2399.3      | wfile      |            |
| th          | 50          | proc       | ft         |
| ins         | 3.000       | fn         | 65536      |
| ai          | ph          | math       | f          |
|             |             | werr       |            |
|             |             | wexp       | process pH |
|             |             | wbs        |            |
|             |             | wnt        | wft        |

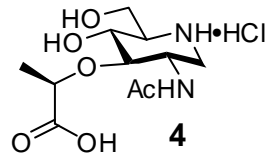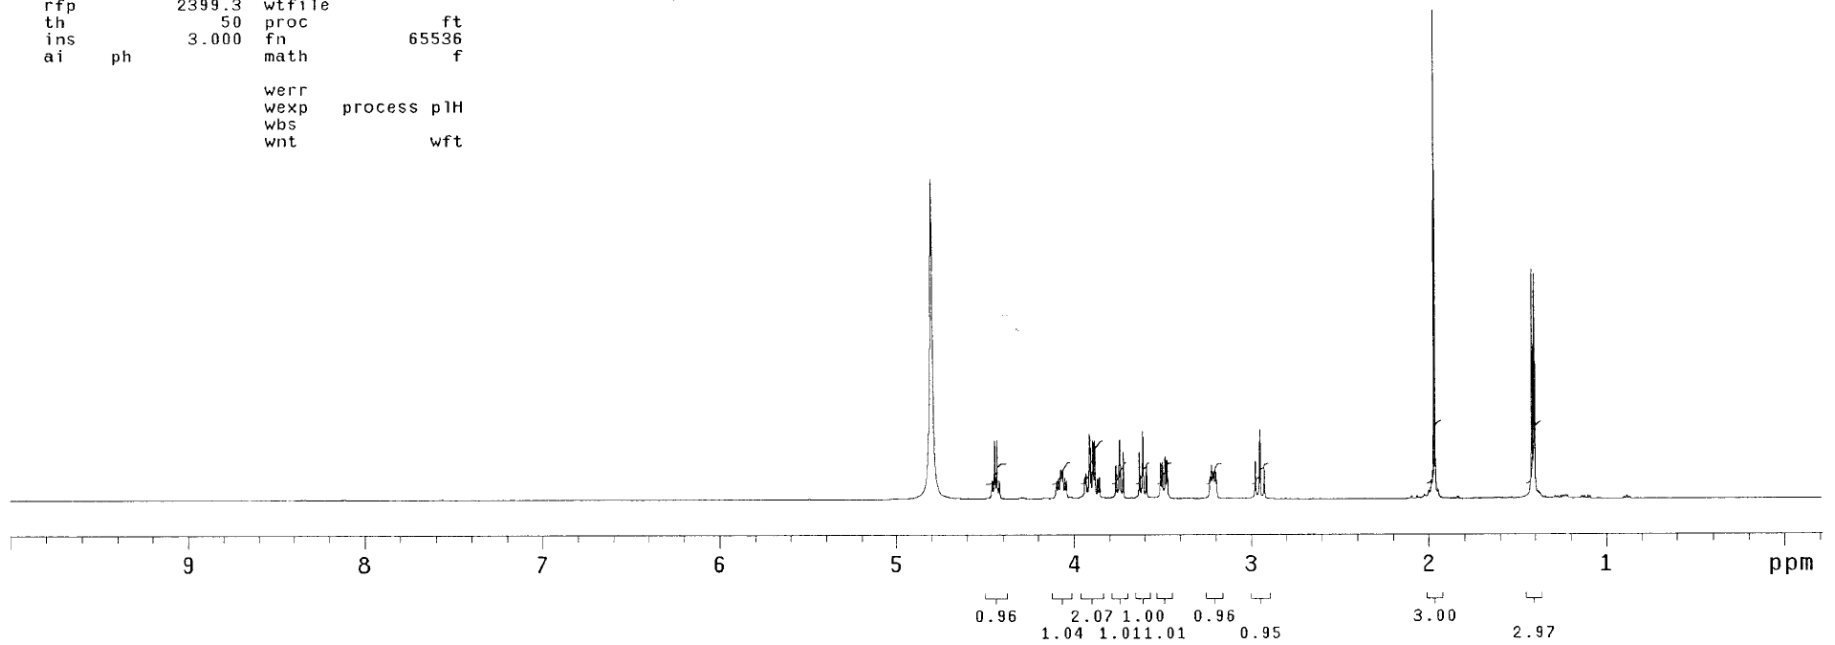

TY2-356

exp2 s2pu1

```
SAMPLE          DEC. & VT
date May 23 2009 dfrq 499.865
solvent D2O      dn      H1
file exp        dpwr   40
ACQUISITION    dof     0
sfrq 125.703   dm      yyy
tn C13         dmm     w
at 1.215      dmf     8787.35
np 65536      dseq
sw 26963.3    dres   1.0
fb 15000     homo   n
bs 4         DEC2
tpwr 52      dfrq2  0
pw 10.2     dn2
d1 1.800   dpwr2  1
tof 144.5  dof2   0
nt 2000    dm2   n
ct 133     dmm2  c
alock n     dmf2  10000
gain not used dseq2
FLAGS      dres2  1.0
           homo2  n
           DEC3
il n
in n
dp y     dfrq3  0
hs nn    dn3
DISPLAY  dpwr3  1
sp -1394.6 dof3  0
wp 26962.9 dm3   n
vs 249     dmm3  c
sc 0       dmf3  10000
wc 250     dseq3
hzmm 107.85 dres3  1.0
is 500.00  homo3  n
rfl 1395.0 PROCESSING
rfp 0      lb     1.00
th 5      wtfile
ins 100.000 proc   ft
ai cdc ph  fn    131072
           math   f
```

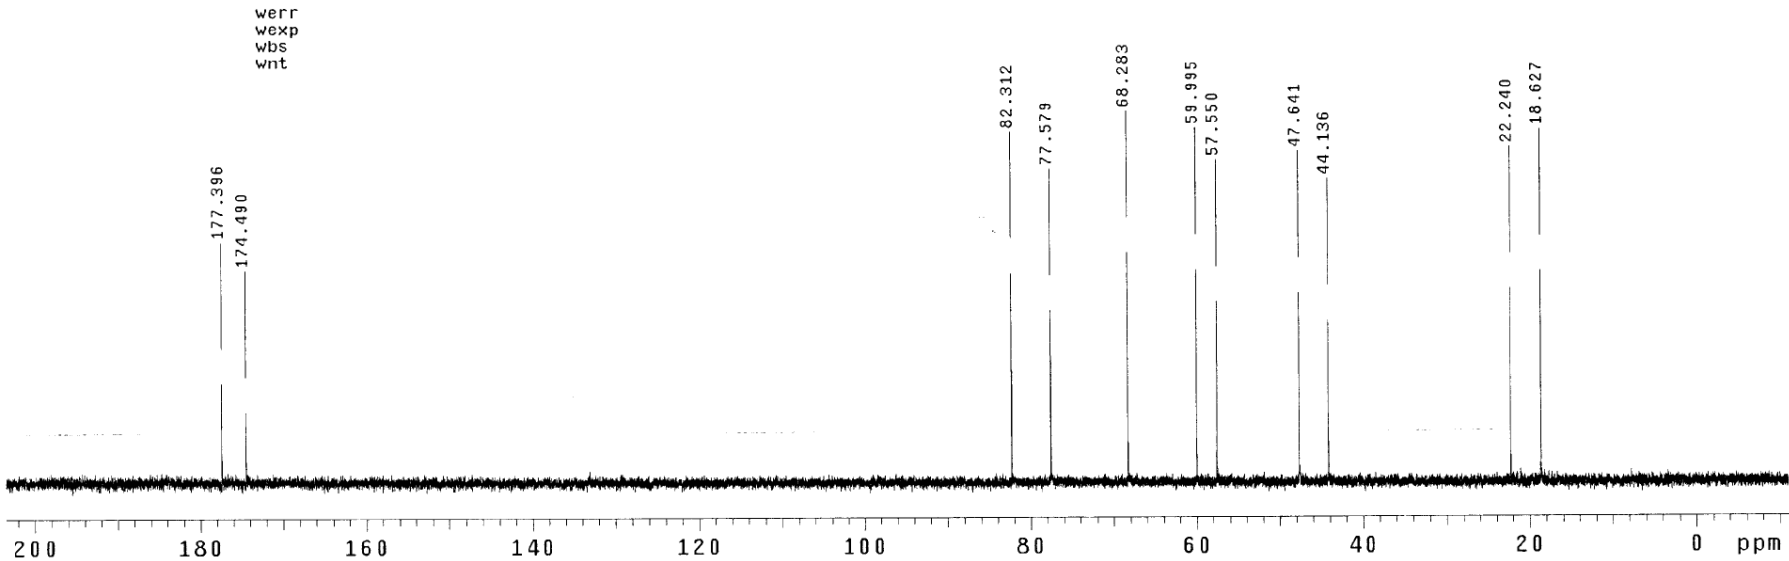



TY2-356

Pulse Sequence: relayh

Solvent: D2O  
Ambient temperature  
INOVA-500 "nmr2a.chem.nd.edu"

Relax. delay 1.300 sec  
COSY 90-90  
Acq. time 0.157 sec  
Width 6533.3 Hz  
2D Width 6533.3 Hz  
32 repetitions  
256 increments  
OBSERVE H1, 499.8623823 MHz  
DATA PROCESSING  
Sine bell 0.078 sec  
F1 DATA PROCESSING  
Sine bell 0.039 sec  
FT size 2048 x 2048  
Total time 3 hr, 23 min, 10 sec

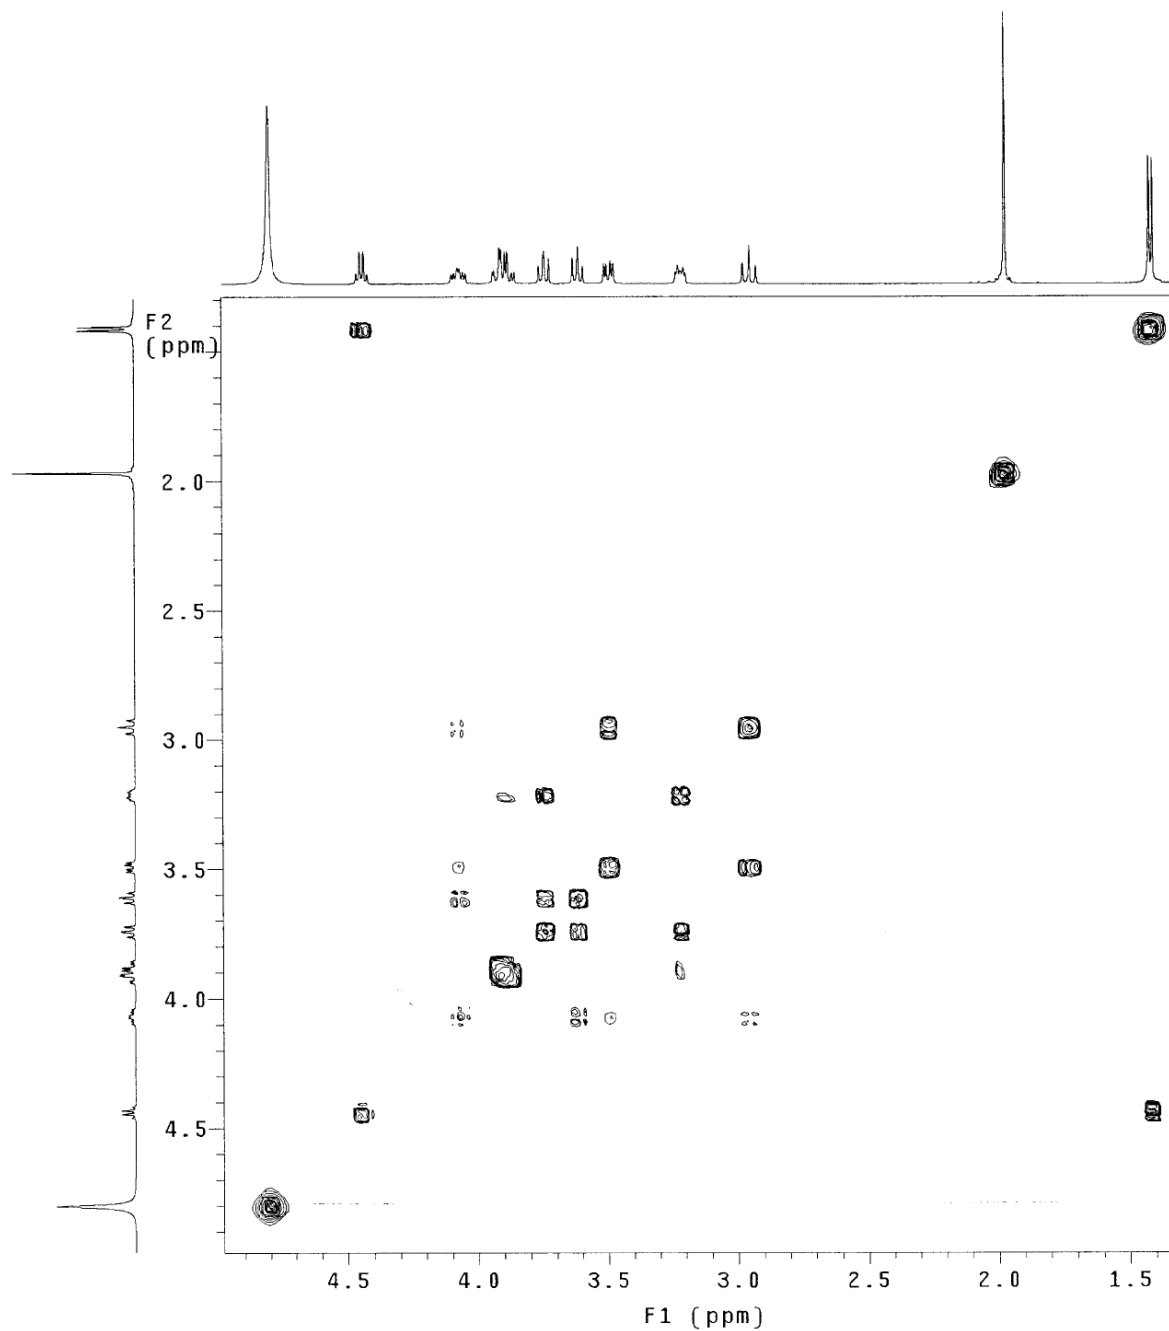

TY2-356

Pulse Sequence: hetcor

Solvent: D2O

Ambient temperature

User: 1-14-87

INOVA-500 "nmr2a.chem.nd.edu"

Relax. delay 1.500 sec

Acq. time 0.111 sec

Width 18403.5 Hz

2D Width 6533.3 Hz

32 repetitions

256 increments

OBSERVE C13, 125.6904822 MHz

DECOUPLE H1, 499.8652159 MHz

Power 40 dB

on during acquisition

off during delay

WALTZ-16 modulated

DATA PROCESSING

Line broadening 1.0 Hz

F1 DATA PROCESSING

Line broadening 0.3 Hz

FT size 4096 x 1024

Total time 3 hr, 46 min, 5 sec

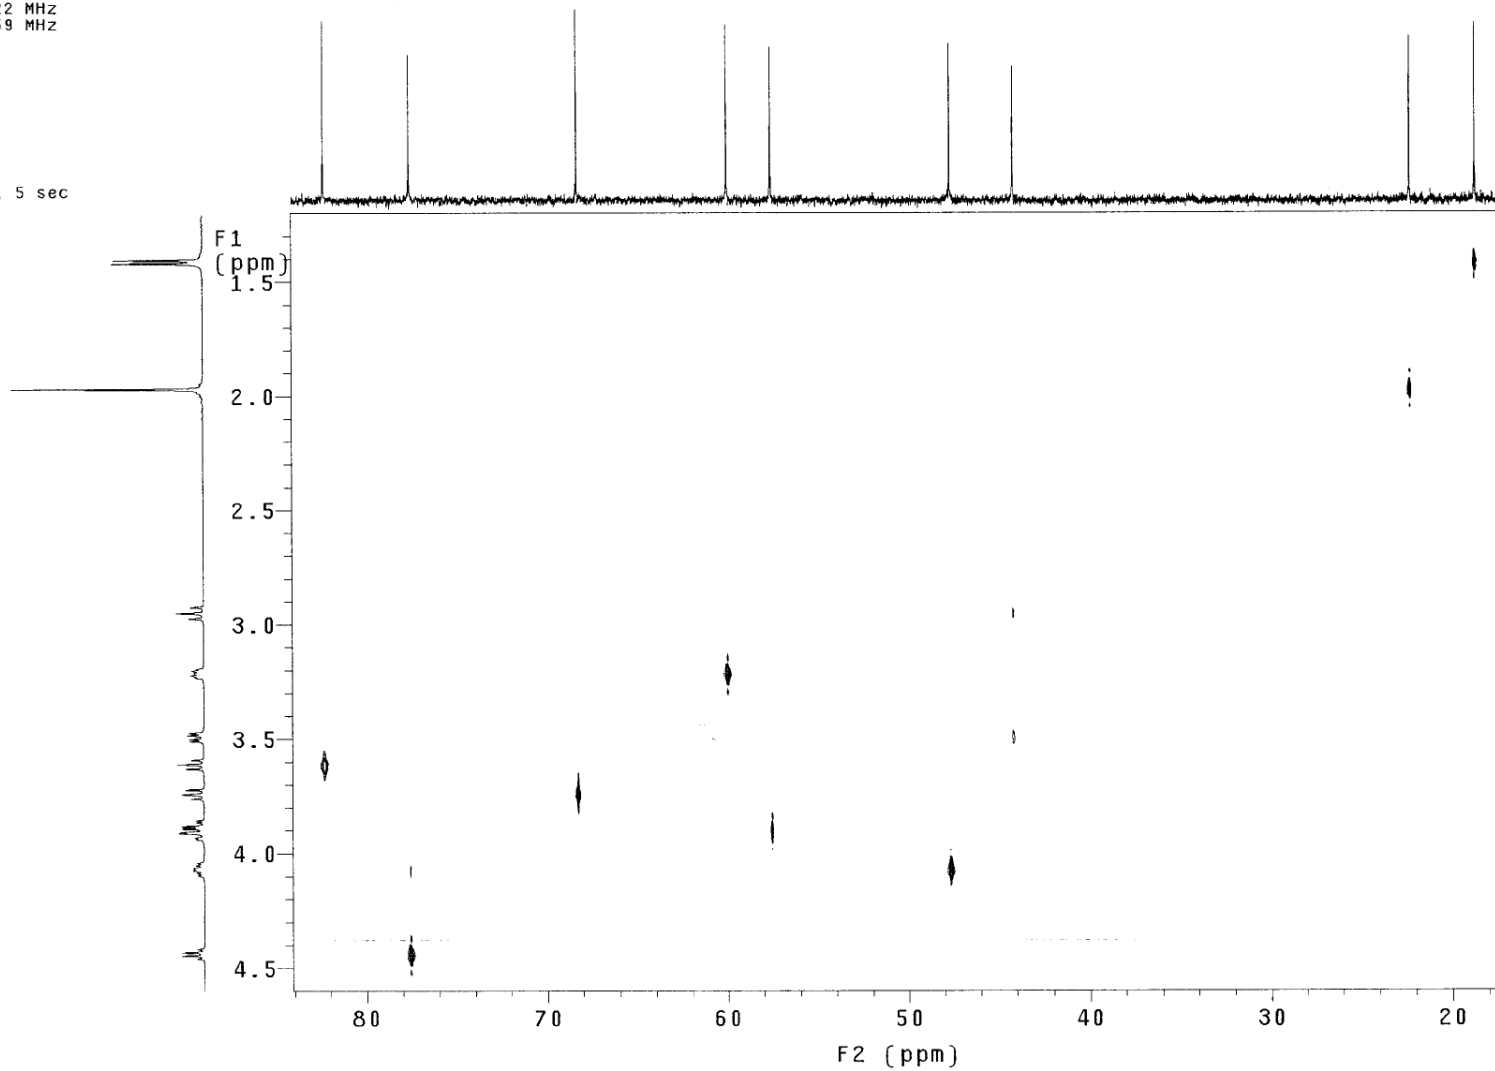

CH3 carbons

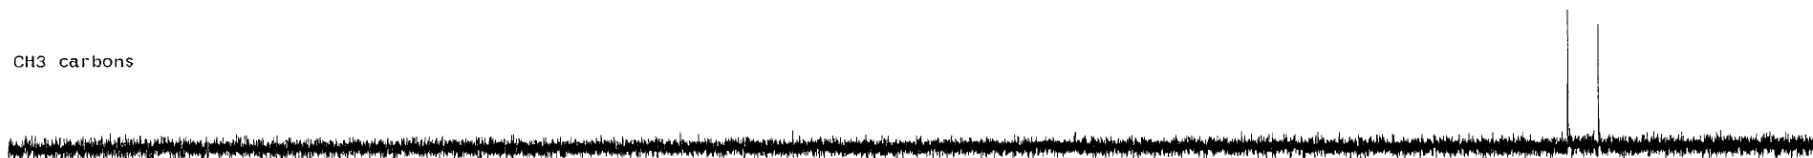

CH2 carbons

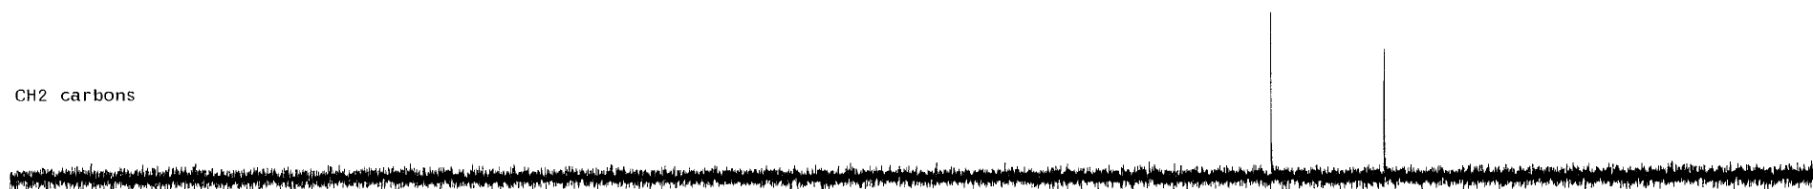

CH carbons

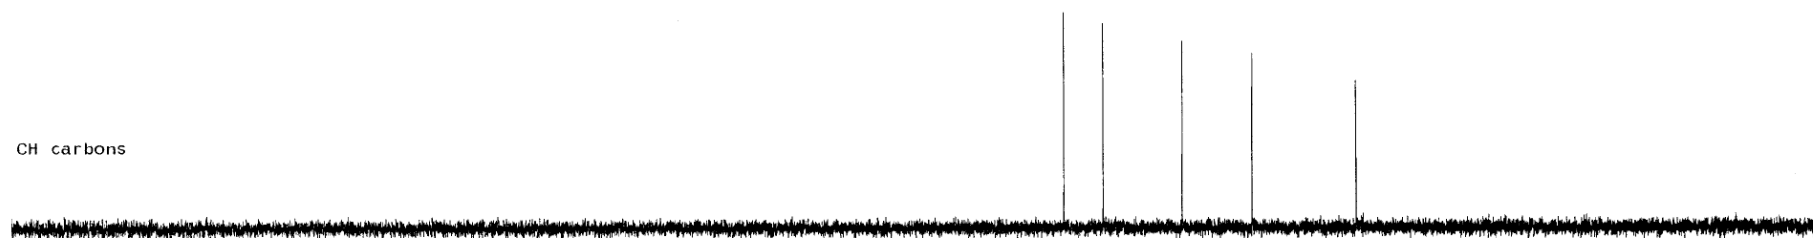

all protonated carbons

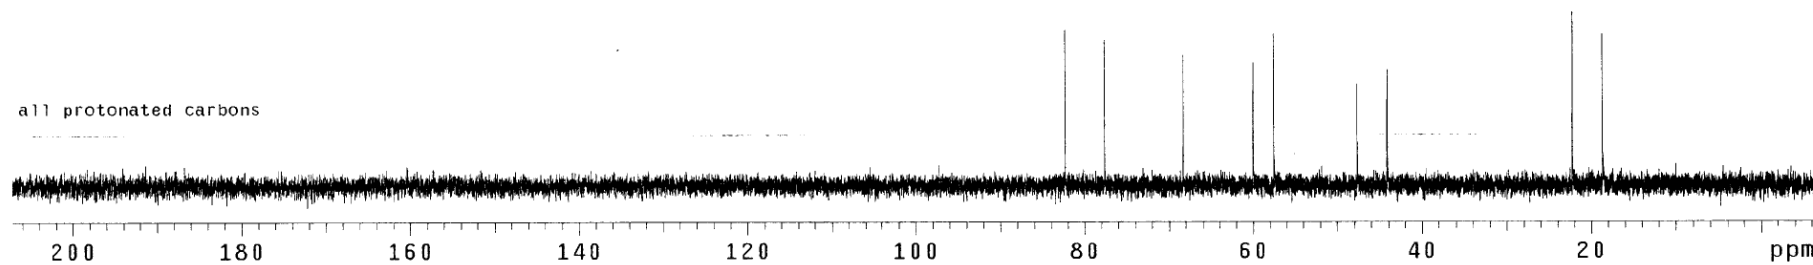

TY2-332

exp1 s2pu1

```
SAMPLE          DEC. & VT
date Apr 11 2009 dfrq          499.864
solvent CDC13      dn           H1
file      exp      dpwr          30
ACQUISITION     dof           0
sfrq          499.864 dm          nnn
tn            H1    dmm           c
at           5.016  dmf          200
np           65536  dseq
sw           6533.3 dres          1.0
fb           4000  homo          n
bs            4     DEC2
tpwr          61   dfrq2         0
pw           13.5  dn2
d1           0.100 dpwr2         1
tof          269.9 dof2          0
nt            16   dm2           n
ct            16   dmm2          c
alock         n   dmf2          200
gain          not used dseq2         1.0
FLAGS         dres2         n
il            n     homo2
in            n     DEC3
dp            y     dfrq3         0
hs            nn    dn3
DISPLAY       dpwr3         1
sp          -107.0 dof3          0
wp          5107.9 dm3           n
vs            61   dmm3          c
sc            0    dmf3          200
wc            250  dseq3
hzmm         20.43 dres3         1.0
is           118.99 homo3         n
rf1          510.6 PROCESSING
rfp            0   wtfile
th            7   proc           ft
ins          1.000 fn           65536
ai      ph      math           f

werr
wexp      process pH
wbs
wnt      wft
```

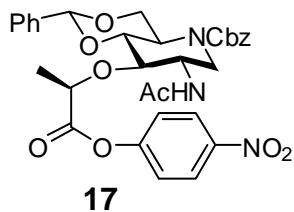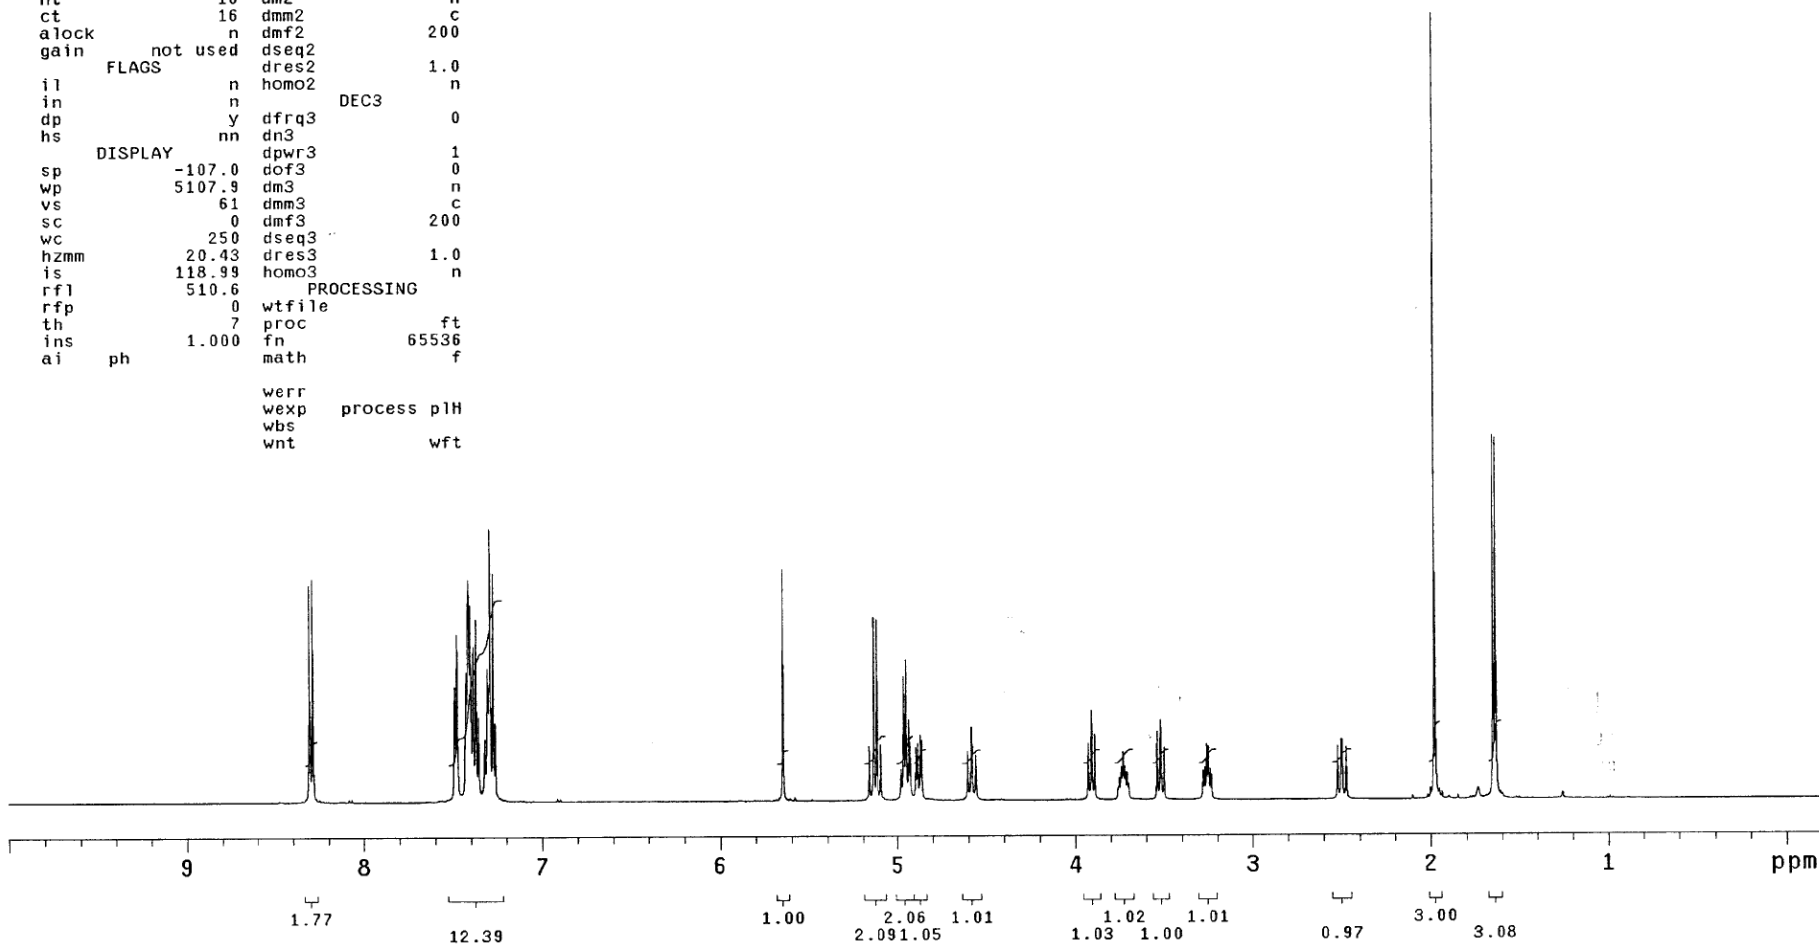

TY2-332

exp2 s2pu1

```
SAMPLE          DEC. & VT
date Apr 11 2009 dfrq      499.864
solvent CDC13    dn        H1
file          exp dpwr     40
ACQUISITION    dof       0
sfrq 125.702   dm        yyy
tn      C13     dmm       w
at      1.215   dmf      8787.35
np      65536   dseq
sw      26963.3 dres     1.0
fb      15000   homo     n
bs      4       DEC2
tpwr    52     dfrq2    0
pw      10.2   dn2
d1      1.800  dpwr2    1
tof     144.5  dof2     0
nt      3000   dm2      n
ct      203    dmm2     c
alock   n      dmf2    10000
gain    not used dseq2
FLAGS   n      dres2    1.0
        n      homo2    n
        y      DECS
        nn     dn3
DISPLAY dpwr3    1
sp      -1404.4 dof3     0
wp      26962.9 dm3      n
vs      106    dmm3     c
sc      0      dmf3    10000
wc      250    dseq3
hzmm    107.85 dres3    1.0
is      500.00 homo3    n
rfl     11111.8 PROCESSING
rfp     9707.1 lb        not used
th      5      wtfile
ins     100.000 ft
ai cdc ph    fn      131072
          math    f
```

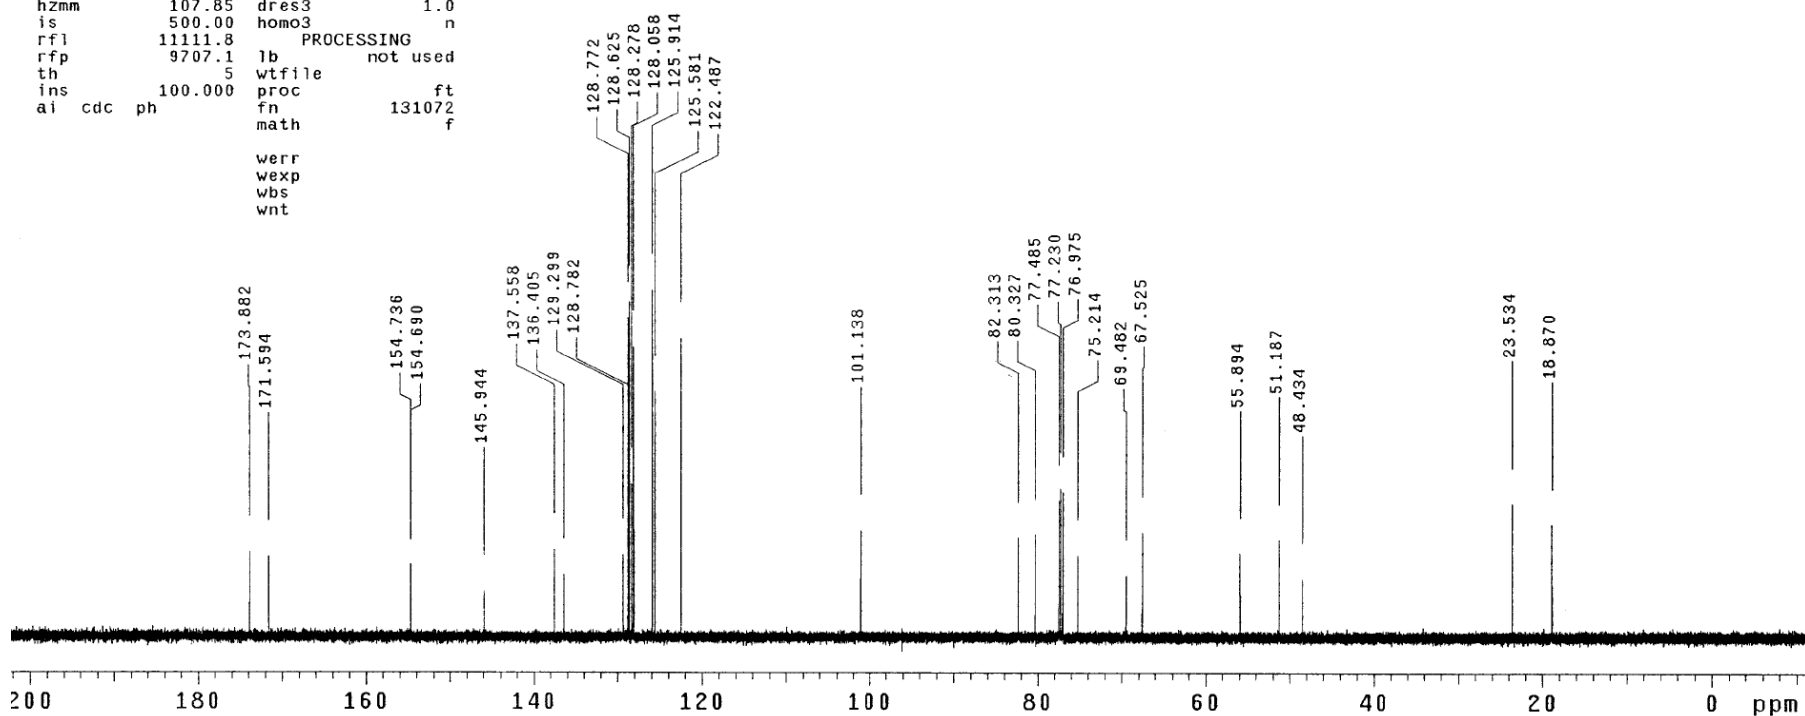

TY2-332

Pulse Sequence: relayh

Solvent: CDCl3  
Ambient temperature  
INOVA-500 "nmr2a.chem.nd.edu"

Relax. delay 1.300 sec  
COSY 90-90  
Acq. time 0.157 sec  
Width 6533.3 Hz  
2D Width 6533.3 Hz  
32 repetitions  
256 increments  
OBSERVE H1, 499.8611751 MHz  
DATA PROCESSING  
Sine bell 0.078 sec  
F1 DATA PROCESSING  
Sine bell 0.039 sec  
FT size 2048 x 2048  
Total time 3 hr, 23 min, 10 sec

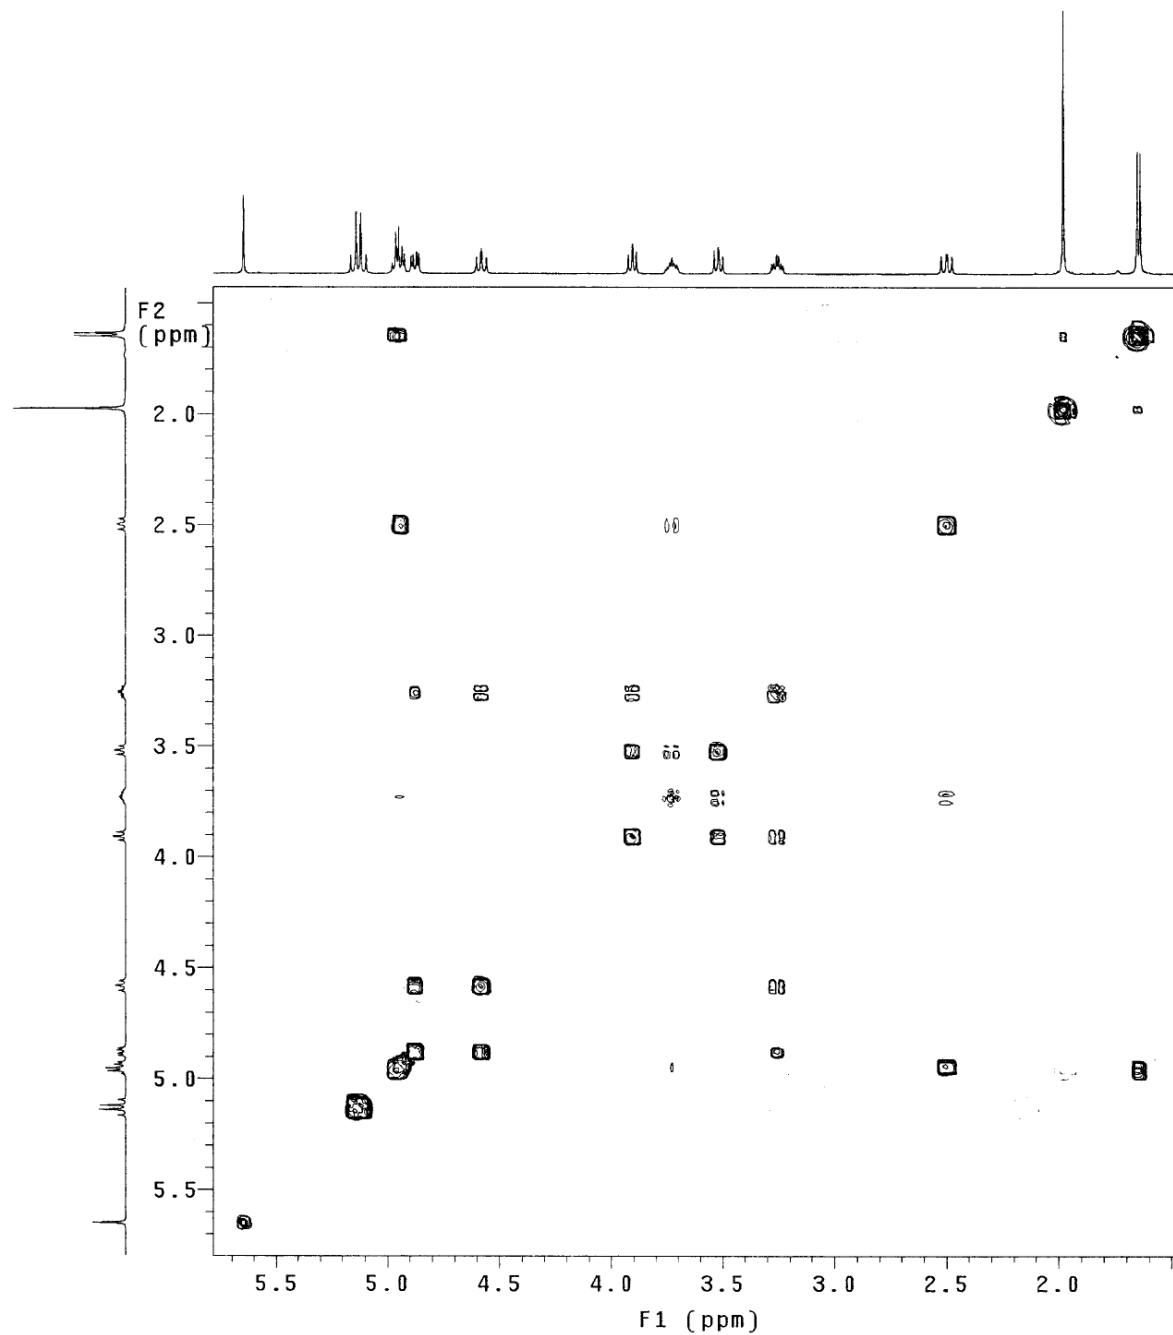

TY2-332

Pulse Sequence: hetcor

Solvent: CDCl<sub>3</sub>  
Ambient temperature  
User: 1-14-87  
File: TY2-332-CH  
INOVA-500 "nmr2a.chem.nd.edu"

Relax. delay 1.500 sec  
Acq. time 0.111 sec  
Width 18403.5 Hz  
2D Width 6533.3 Hz  
64 repetitions  
256 increments  
OBSERVE C13, 125.6901689 MHz  
DECOUPLE H1, 499.8639312 MHz  
Power 40 dB  
on during acquisition  
off during delay  
WALTZ-16 modulated  
DATA PROCESSING  
Line broadening 1.0 Hz  
F1 DATA PROCESSING  
Line broadening 0.3 Hz  
FT size 4096 x 1024  
Total time 7 hr, 32 min, 4 sec

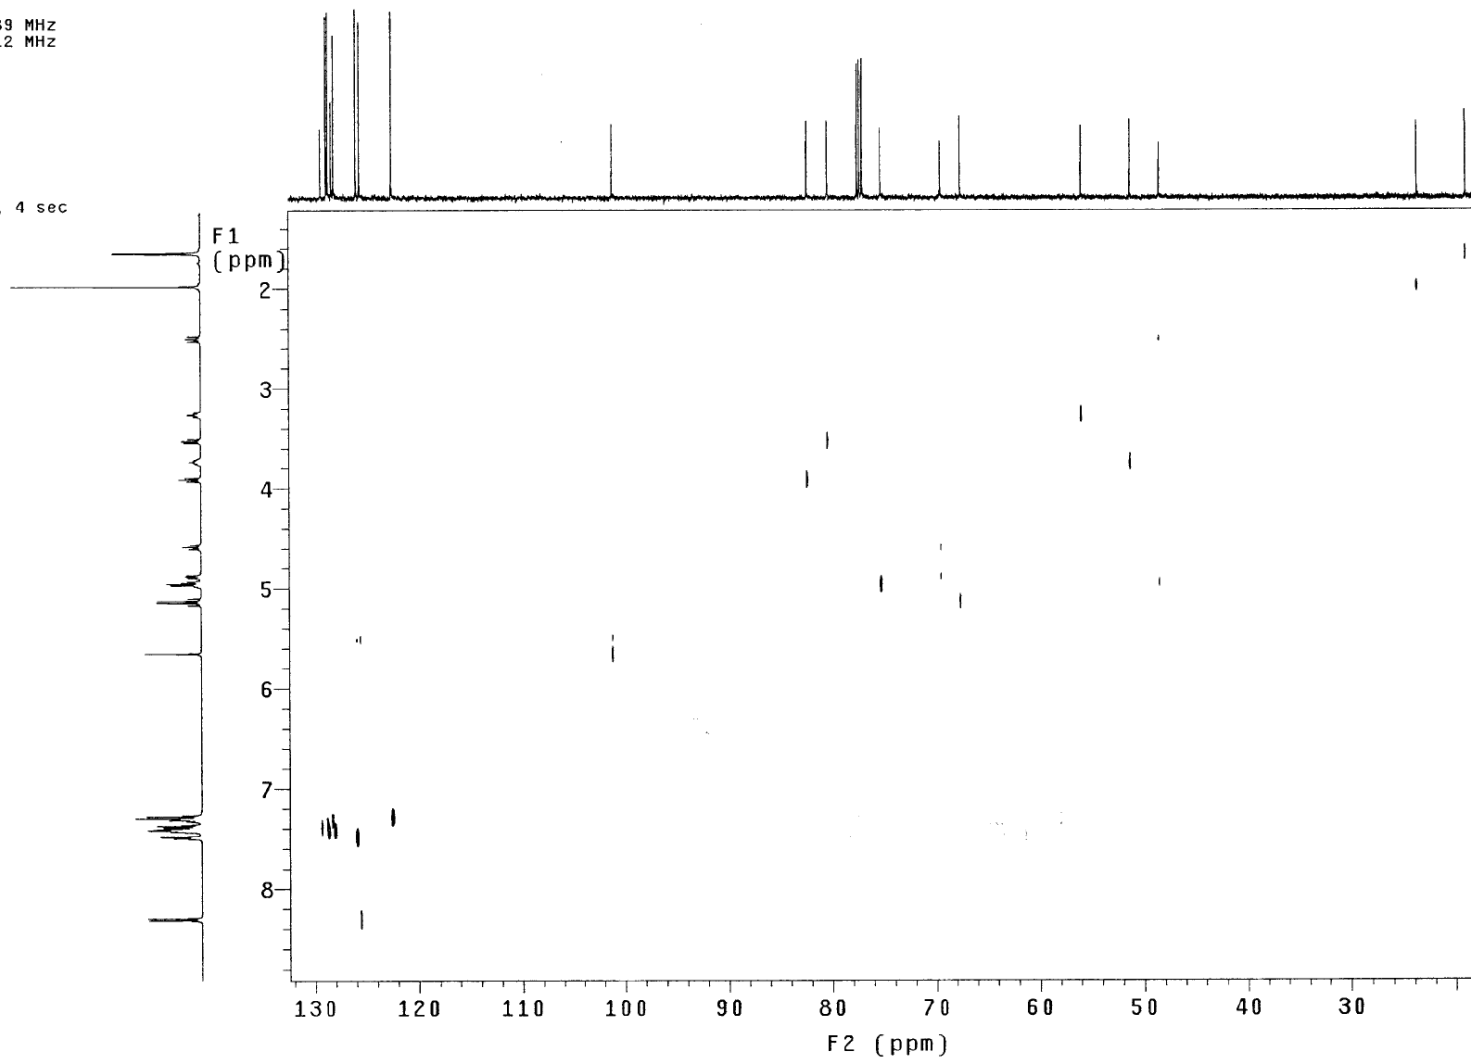

CH3 carbons

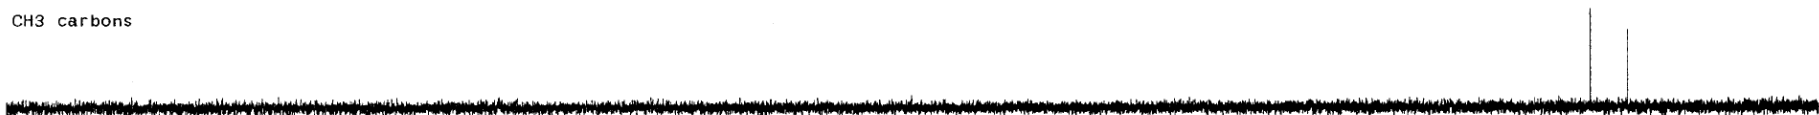

CH2 carbons

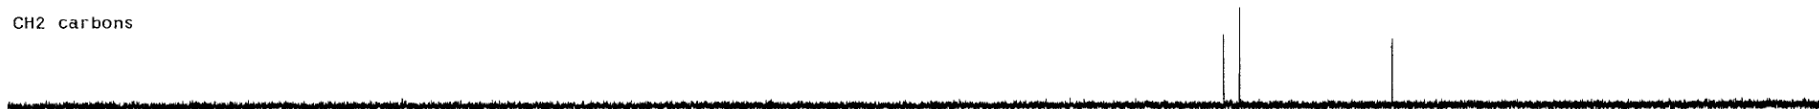

CH carbons

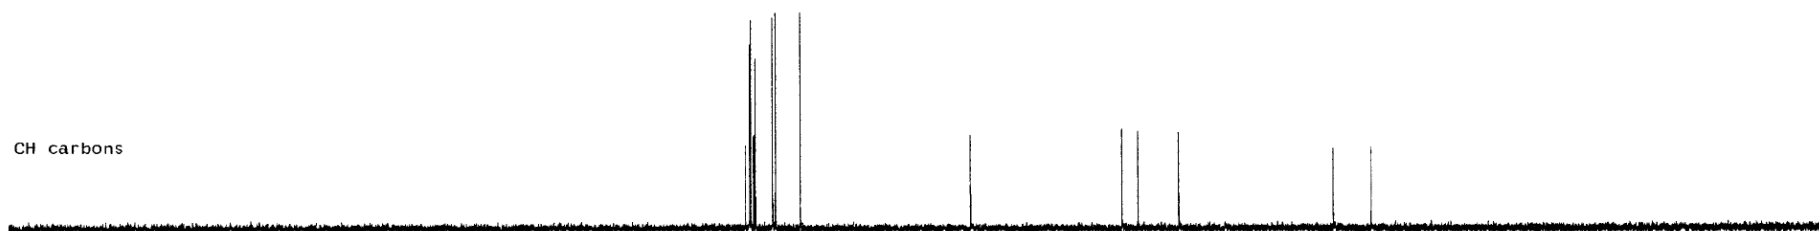

all protonated carbons

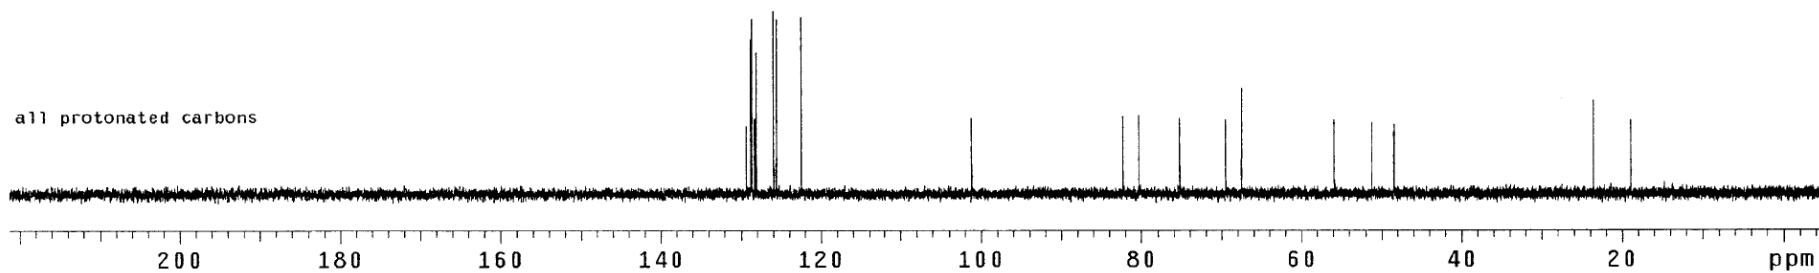



TY2-347

exp1 s2pu1

```
SAMPLE          DEC. & VT
date May 8 2009  dfrq      499.864
solvent CDC13    dn        H1
file      exp    dpwr     30
ACQUISITION     dof      0
sfrq      499.864 dm       nnn
tn         H1    dmm      c
at         5.016 dmf     200
np         65536 dseq
sw         6533.3 dres   1.0
fb         4000  homo    n
bs         4      DEC2
tpwr       61    dfrq2   0
pw         13.5 dn2
d1         0.100 dpwr2   1
tof        269.9 dof2   0
nt         16    dm2     n
ct         16    dmm2   c
alock      n    dmf2   200
gain       not used dseq2
          FLAGS    dres2  1.0
          il       n    homo2 n
          in       n      DEC3
          dp       y    dfrq3 0
          hs       nn   dn3
          DISPLAY  dpwr3 1
          sp      -111.4 dof3 0
          wp       5107.9 dm3  n
          vs       36    dmm3  c
          sc       0     dmf3  200
          wc       250   dseq3
          hzmm     20.43 dres3 1.0
          is       98.40 homo3  n
          rfl     4140.3 PROCESSING
          rfp     3634.0 wfile
          th       7     proc   ft
          ins     2.000  fn     65536
          ai      ph    math   f
          werr
          wexp      process pH
          wbs
          wnt       wft
```

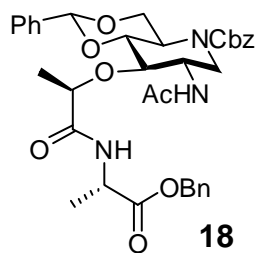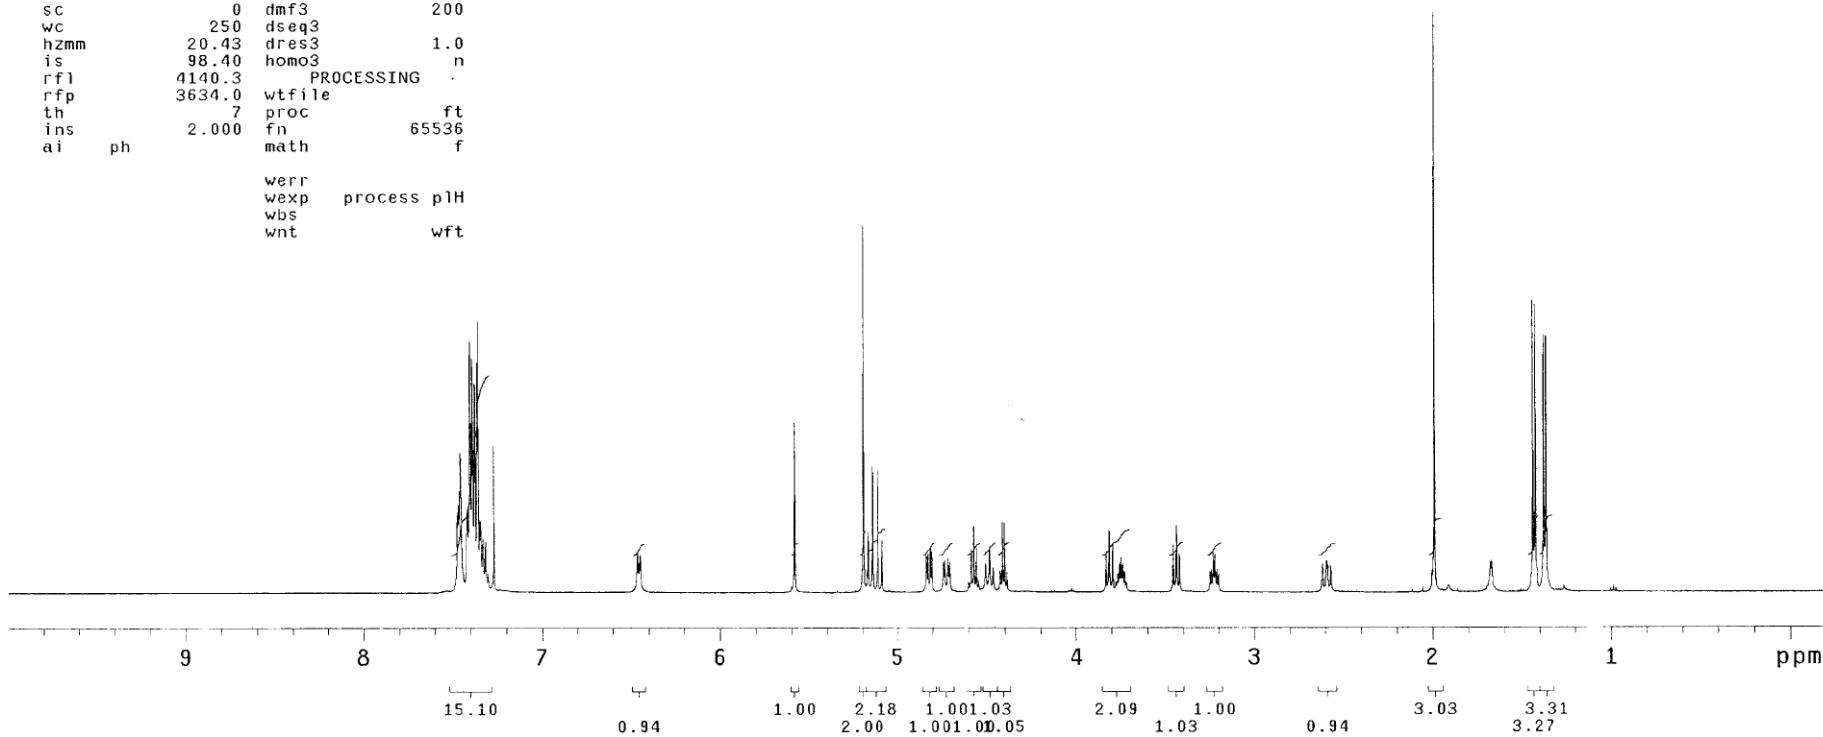

TY2-347

exp2 s2pu1

```
SAMPLE          DEC. & VT
date Apr 23 2009 dfrq          499.864
solvent CDC13     dn           H1
file exp         dpwr          40
ACQUISITION     dof           0
sfrq 125.702     dm           yy
tn C13           dmm          w
at 1.215         dmf          8787.35
np 65536         dseq
sw 26963.3       dres          1.0
fb 15000         homo          n
bs 4             DEC2
tpwr 52          dfrq2         0
pw 10.2          dn2
d1 1.800         dpwr2         1
tof 144.5        dof2          0
nt 3000          dm2           n
ct 260           dmm2          c
alock n          dmf2          10000
gain not used    dseq2
FLAGS           dres2          1.0
il n            homo2         n
in n            DEC3
dp y            dfrq3         0
hs nn           dn3
DISPLAY         dpwr3         1
sp -1405.6       dof3          0
wp 26962.9       dm3           n
vs 375           dmm3          c
sc 0             dmf3          10000
wc 250           dseq3         1.0
hzmm 107.85      dres3         n
is 500.00        homo3
rfl 11113.0      PROCESSING
rfp 9707.1       lb           1.00
th 9             wtfile
ins 100.000      proc         ft
ai cdc ph       fn           131072
math           f

werr
wexp
wbs
wnt
```

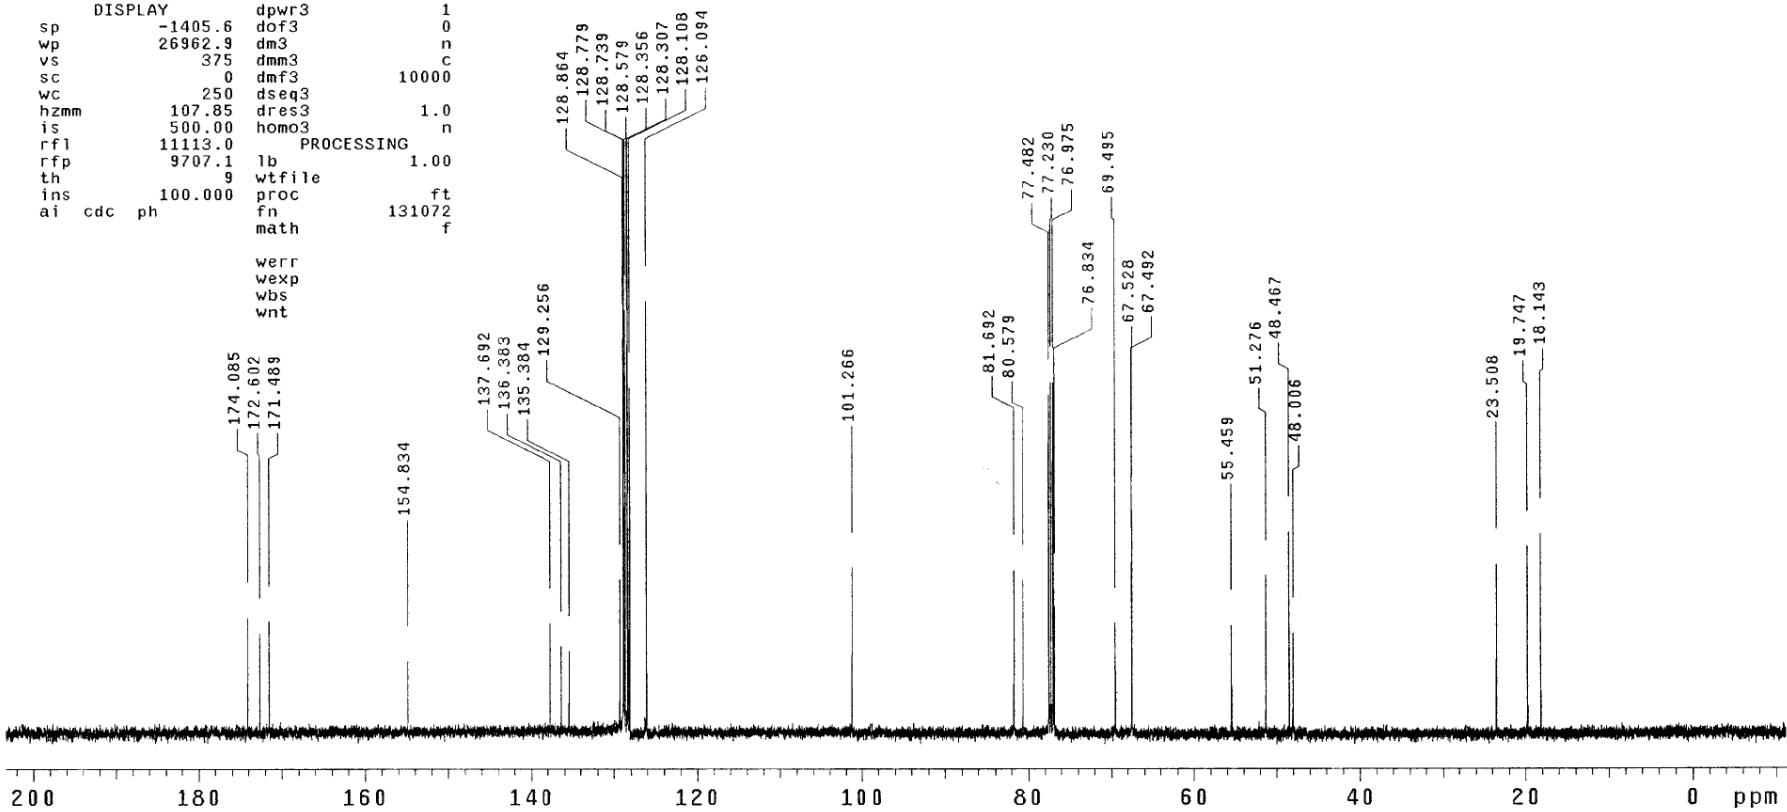

TY2-347

Pulse Sequence: relayh  
Solvent: CDC13  
Ambient temperature  
INOVA-500 "nmr2a.chem.nd.edu"

Relax. delay 1.300 sec  
COSY 90-90  
Acq. time 0.157 sec  
Width 6533.3 Hz  
2D Width 6533.3 Hz  
32 repetitions  
256 increments  
OBSERVE H1, 499.8611707 MHz  
DATA PROCESSING  
Sine bell 0.078 sec  
F1 DATA PROCESSING  
Sine bell 0.039 sec  
FT size 2048 x 2048  
Total time 3 hr, 23 min, 10 sec

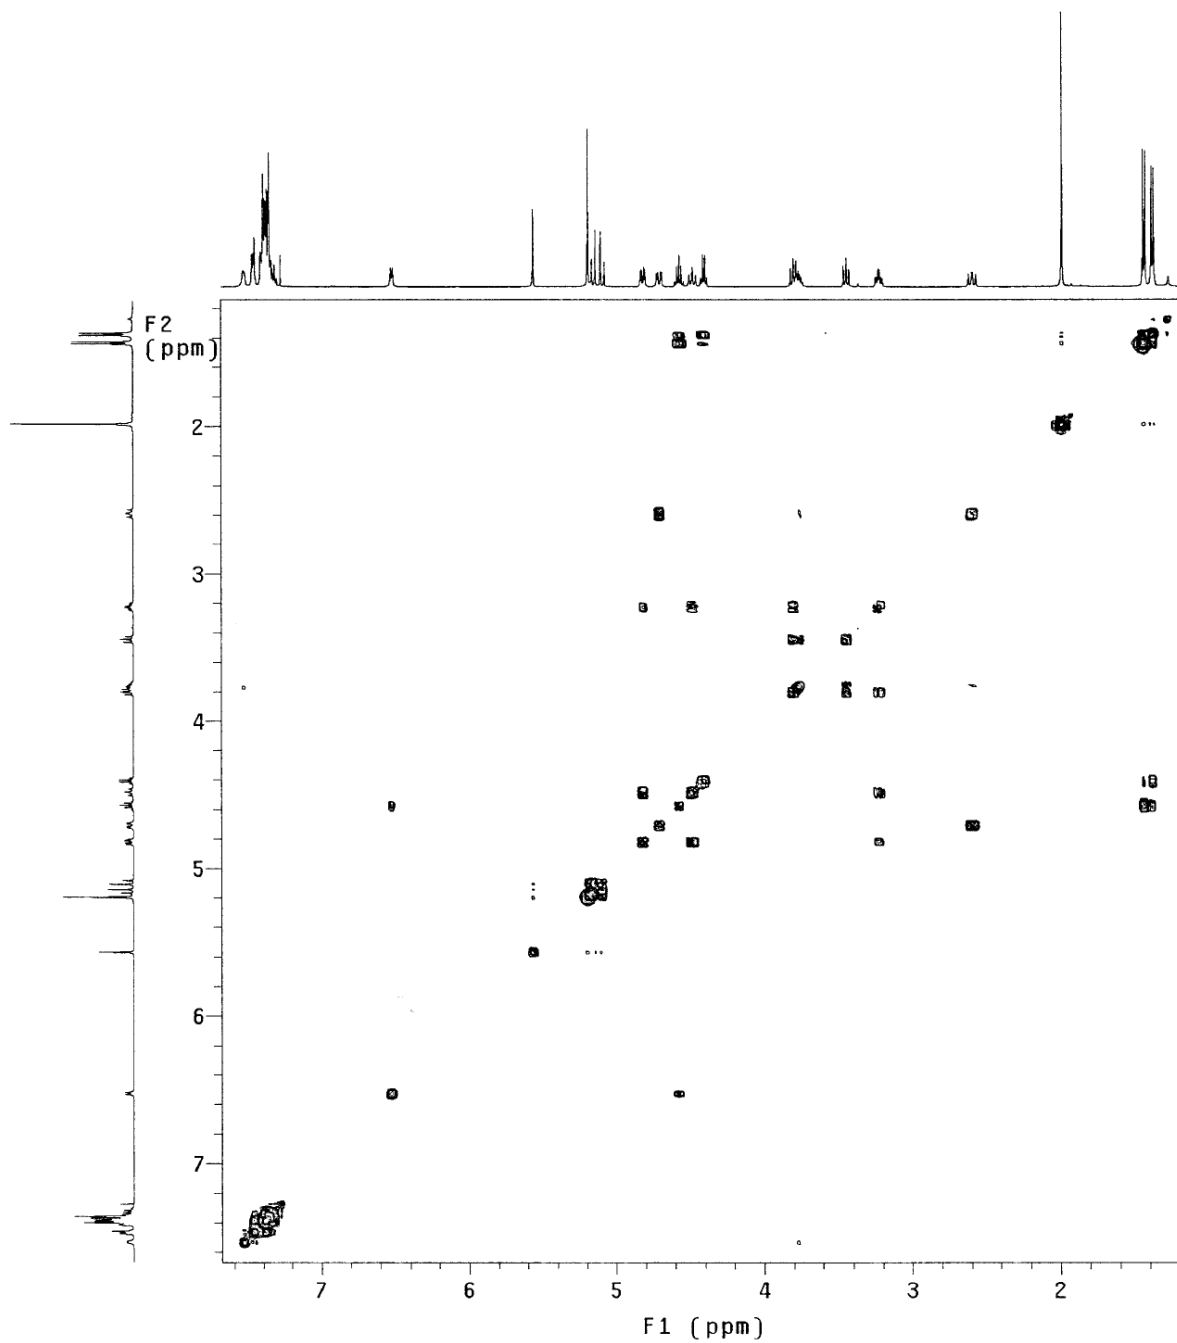

TY2-347

Pulse Sequence: hetcor

Solvent: CDC13

Ambient temperature

User: 1-14-87

INOVA-500 "nmr2a.chem.nd.edu"

Relax. delay 1.500 sec

Acq. time 0.111 sec

Width 18403.5 Hz

2D Width 6533.3 Hz

32 repetitions

256 increments

OBSERVE C13, 125.6901702 MHz

DECOUPLE H1, 499.8639312 MHz

Power 40 dB

on during acquisition

off during delay

WALTZ-16 modulated

DATA PROCESSING

Line broadening 1.0 Hz

F1 DATA PROCESSING

Line broadening 0.3 Hz

FT size 4096 x 1024

Total time 3 hr, 46 min, 5 sec

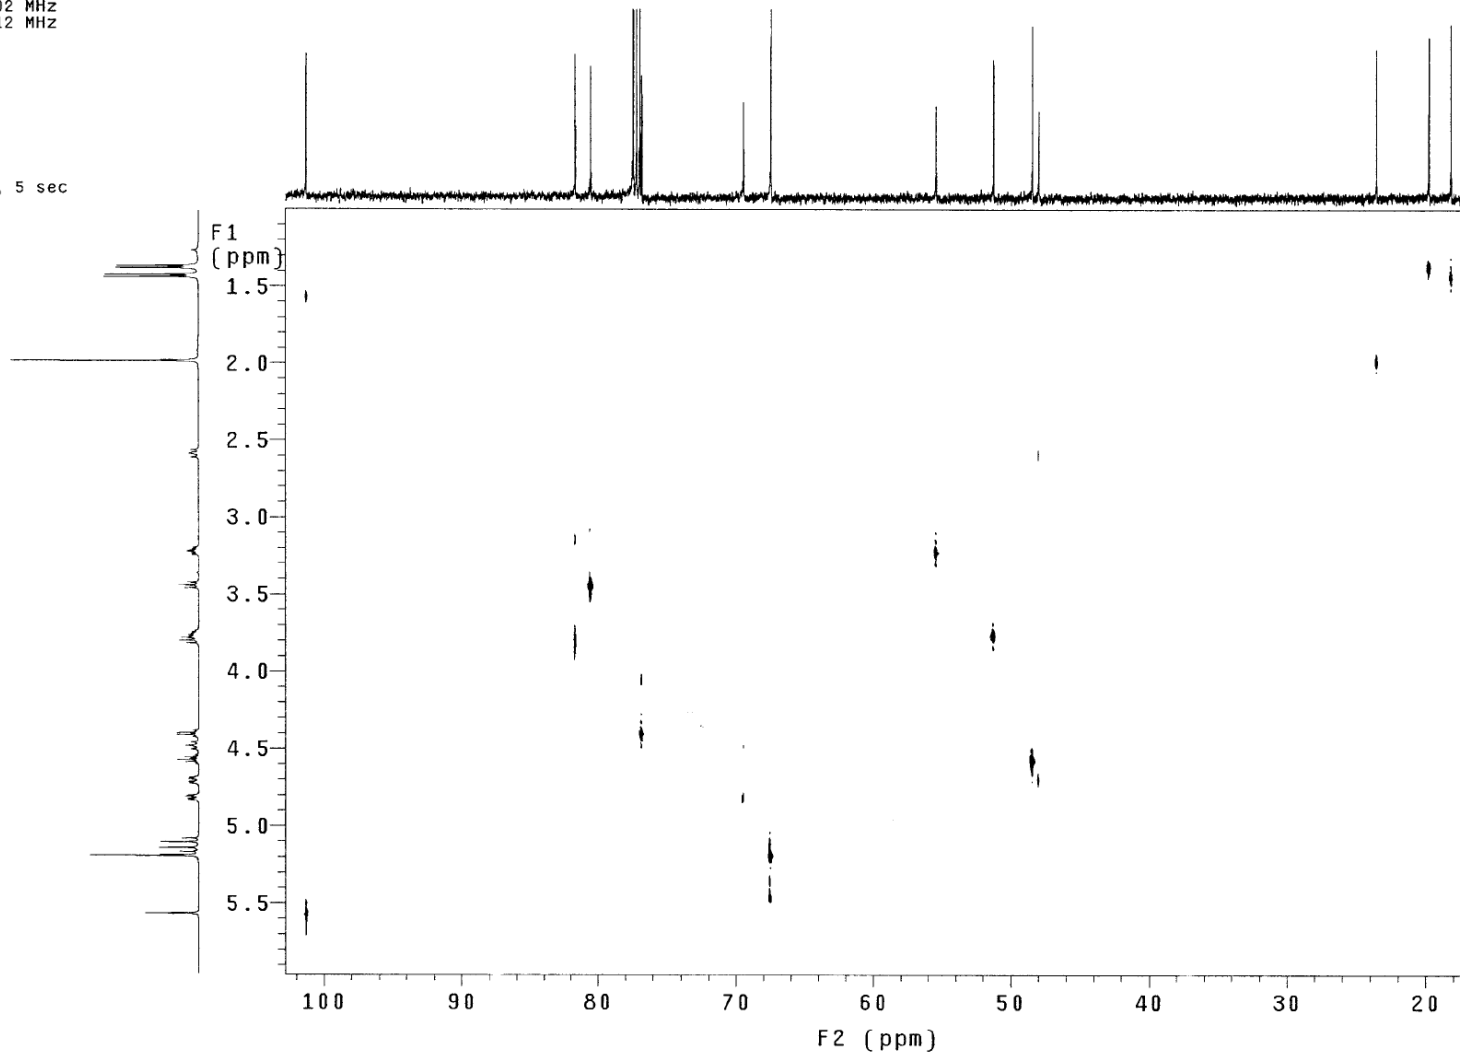

CH3 carbons

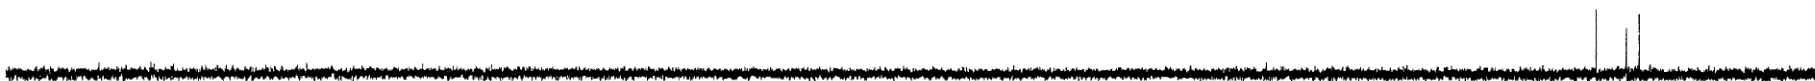

CH2 carbons

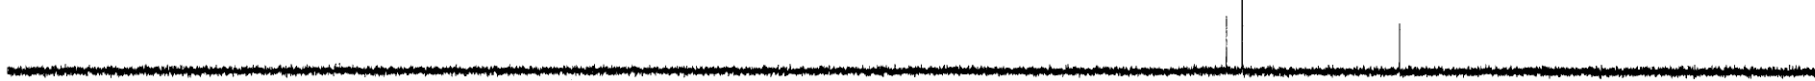

CH carbons

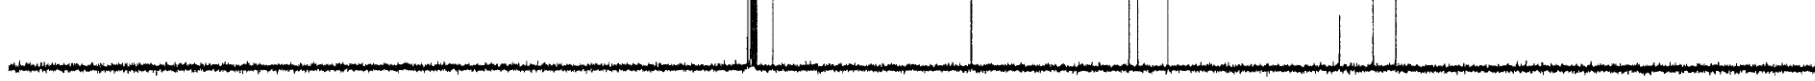

all protonated carbons

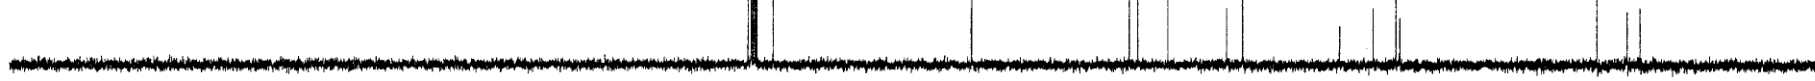

200 180 160 140 120 100 80 60 40 20 ppm

TY2-357

exp1 s2pu1

```
SAMPLE      DEC. & VT
date May 28 2009 dfrq      499.865
solvent      D2O          dn          H1
file         exp         dpwr         30
ACQUISITION dof          0
sfrq        499.865     dm          nnn
tn           H1         dmm          c
at           5.016      dmf         200
np           65536      dseq
sw           6533.3     dres        1.0
fb           4000      homo        n
bs           4
tpwr        61         dfrq2       0
pw          13.5       dn2
d1           0.100     dpwr2       1
tof         269.9     dof2        0
nt           32         dm2         n
ct           32         dmm2        c
alock       n         dmf2        200
gain        not used   dseq2
FLAGS       n         dres2       1.0
            n         homo2       n
            y         dfrq3       0
            nn        dn3
DISPLAY     dpwr3     1
sp          -108.3     dof3        0
wp          5107.9     dm3         n
vs          41         dmm3        c
sc          0         dmf3        200
wc          250        dseq3
hzmm        20.43     dres3       1.0
is          266.73     homo3       n
rfl         2834.0     PROCESSING
rfp         2399.3     wfile
th          50         proc        ft
ins         3.000     fn          65536
ai          ph        math         f
                    werr
                    wexp   process pH
                    wbs
                    wnt    wft
```

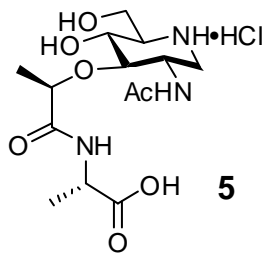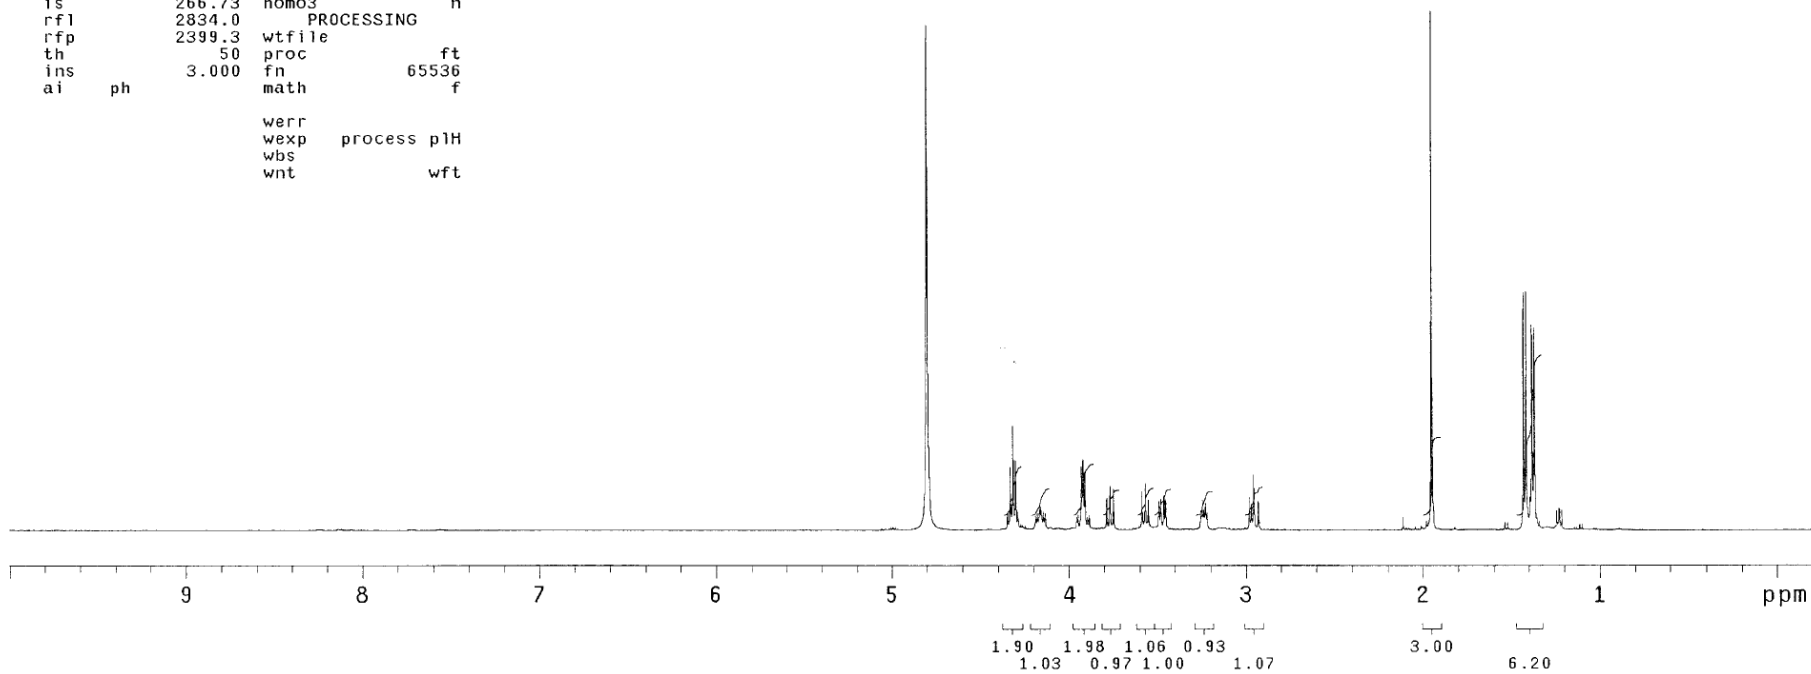

TY2-357

exp2 s2pu1

```
      SAMPLE      DEC. & VT
date  May 28 2009  dfrq      499.865
solvent D20      dn        H1
file    exp      dpwr      40
      ACQUISITION  dof        0
sfrq    125.703  dm         yy
tn       C13     dmm        w
at       1.215   dmf        8787.35
np       65536   dseq
sw       26963.3 dres      1.0
fb       15000   homo      n
bs       4       DEC2
tpwr     52     dfrq2     0
pw       10.2   dn2
d1       1.800  dpwr2     1
tof      144.5  dof2      0
nt       3000   dm2       n
ct       160   dmm2      c
alock    n     dmf2     10000
gain     not used dseq2
      FLAGS     dres2     1.0
il       n     homo2     n
in       n     DEC3
dp       y     dfrq3     0
hs       nn    dn3
      DISPLAY  dpwr3     1
sp      -1394.6 dof3      0
wp      26962.9 dm3       n
vs       363   dmm3      c
sc       0     dmf3     10000
wc       250   dseq3
hzmm     107.85 dres3     1.0
is       500.00 homo3     n
rfl      1395.0 PROCESSING
rfp       0     lb        1.00
th       4     wtfile
ins     100.000 proc      ft
ai cdc ph    fn      131072
      math      f
```

werr  
wexp  
wbs  
wnt

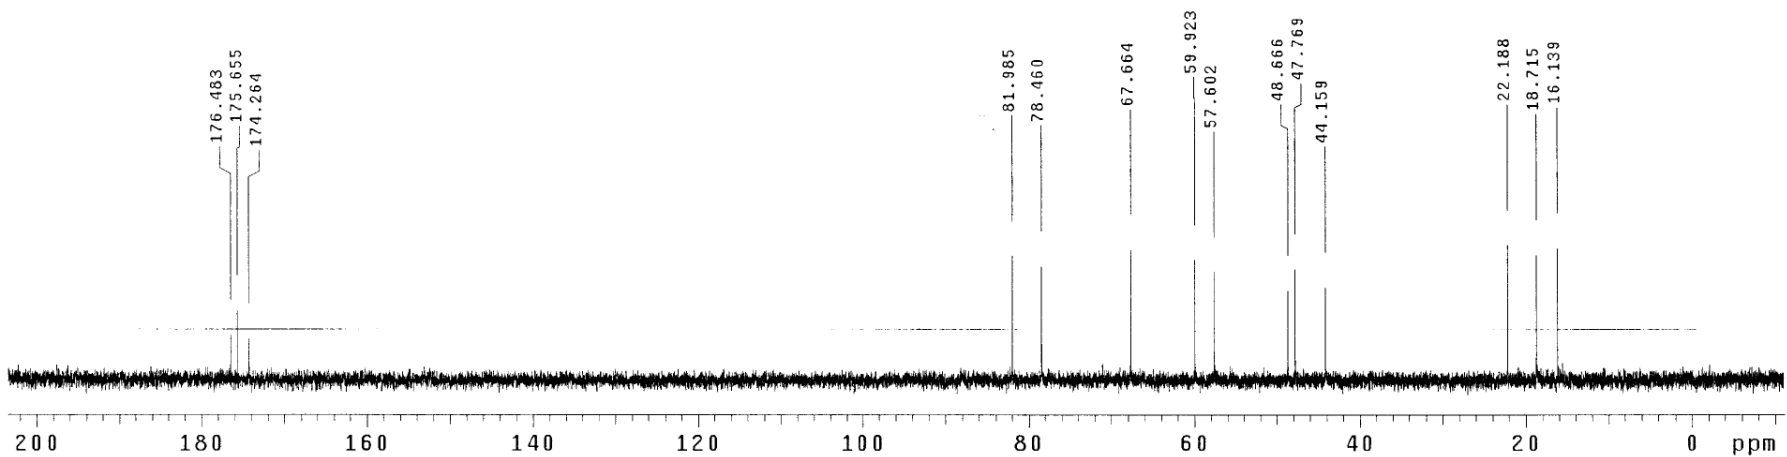

TY2-357

Pulse Sequence: relayh  
Solvent: D2O  
Ambient temperature  
INOVA-500 "nmr2a.chem.nd.edu"

Relax. delay 1.300 sec  
COSY 90-90  
Acq. time 0.157 sec  
Width 6533.3 Hz  
2D Width 6533.3 Hz  
64 repetitions  
256 increments  
OBSERVE H1, 499.8623841 MHz  
DATA PROCESSING  
Sine bell 0.078 sec  
F1 DATA PROCESSING  
Sine bell 0.039 sec  
FT size 2048 x 2048  
Total time 6 hr, 46 min, 8 sec

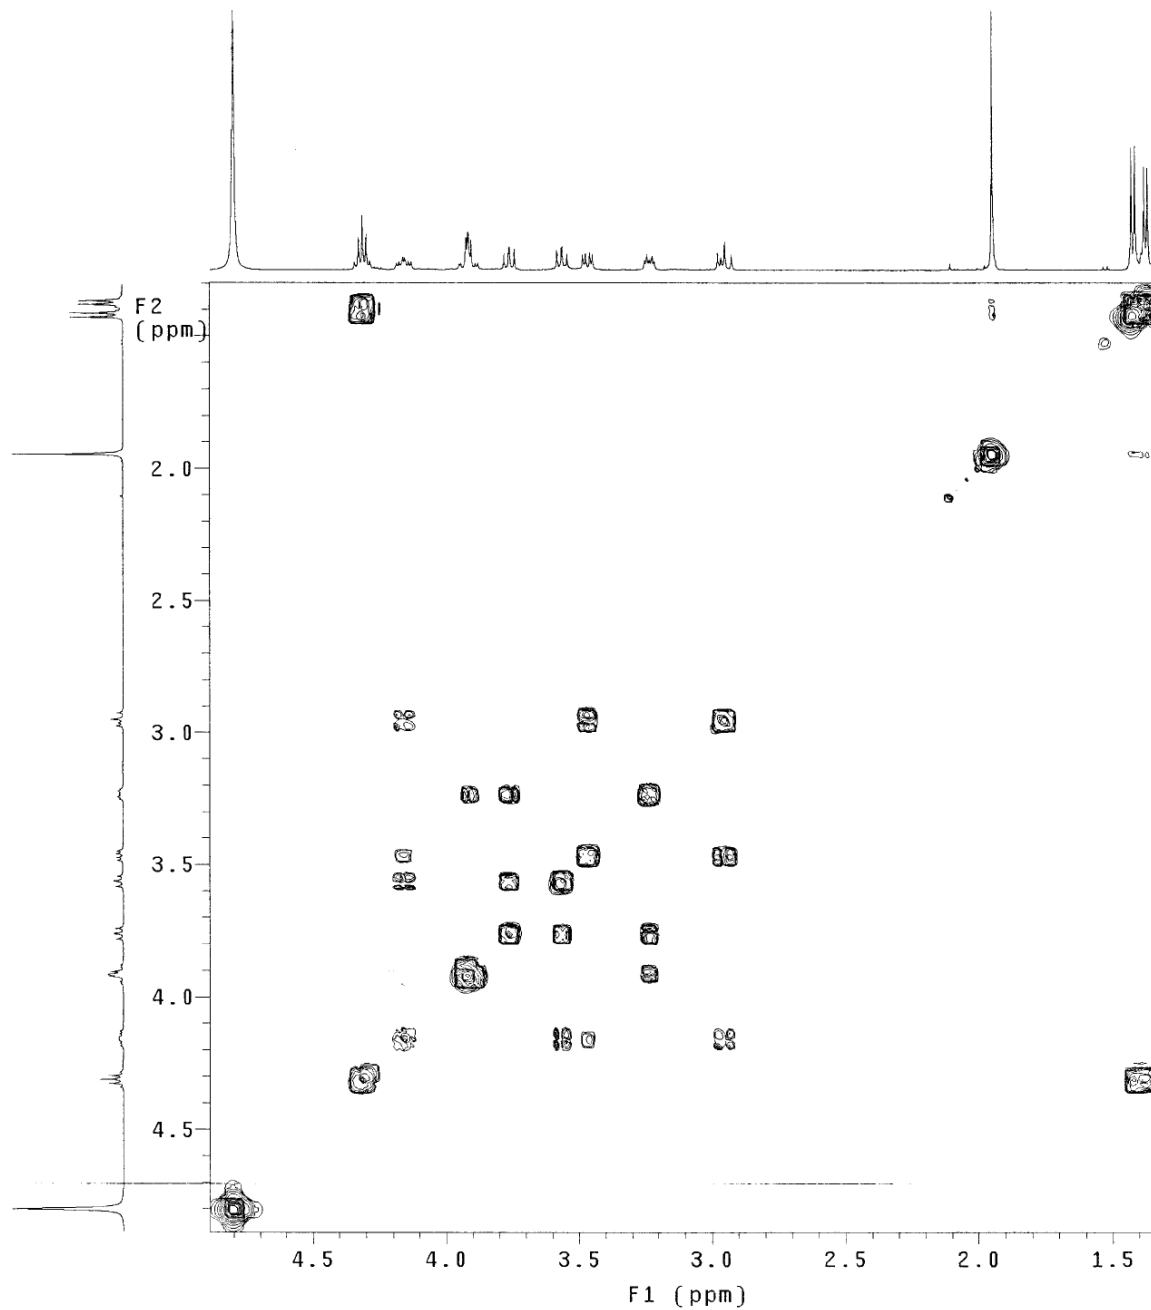



TY2-357

Pulse Sequence: hetcor

Solvent: D2O  
Ambient temperature  
User: 1-14-87  
File: TY2-357-CH  
INOVA-500 "nmr2a.chem.nd.edu"

Relax. delay 1.500 sec  
Acq. time 0.111 sec  
Width 18403.5 Hz  
2D Width 6533.3 Hz  
64 repetitions  
256 increments  
OBSERVE C13, 125.6904822 MHz  
DECOUPLE H1, 499.8652159 MHz  
Power 40 dB  
on during acquisition  
off during delay  
WALTZ-16 modulated  
DATA PROCESSING  
Line broadening 1.0 Hz  
F1 DATA PROCESSING  
Line broadening 0.3 Hz  
FT size 4096 x 1024  
Total time 7 hr, 32 min, 4 sec

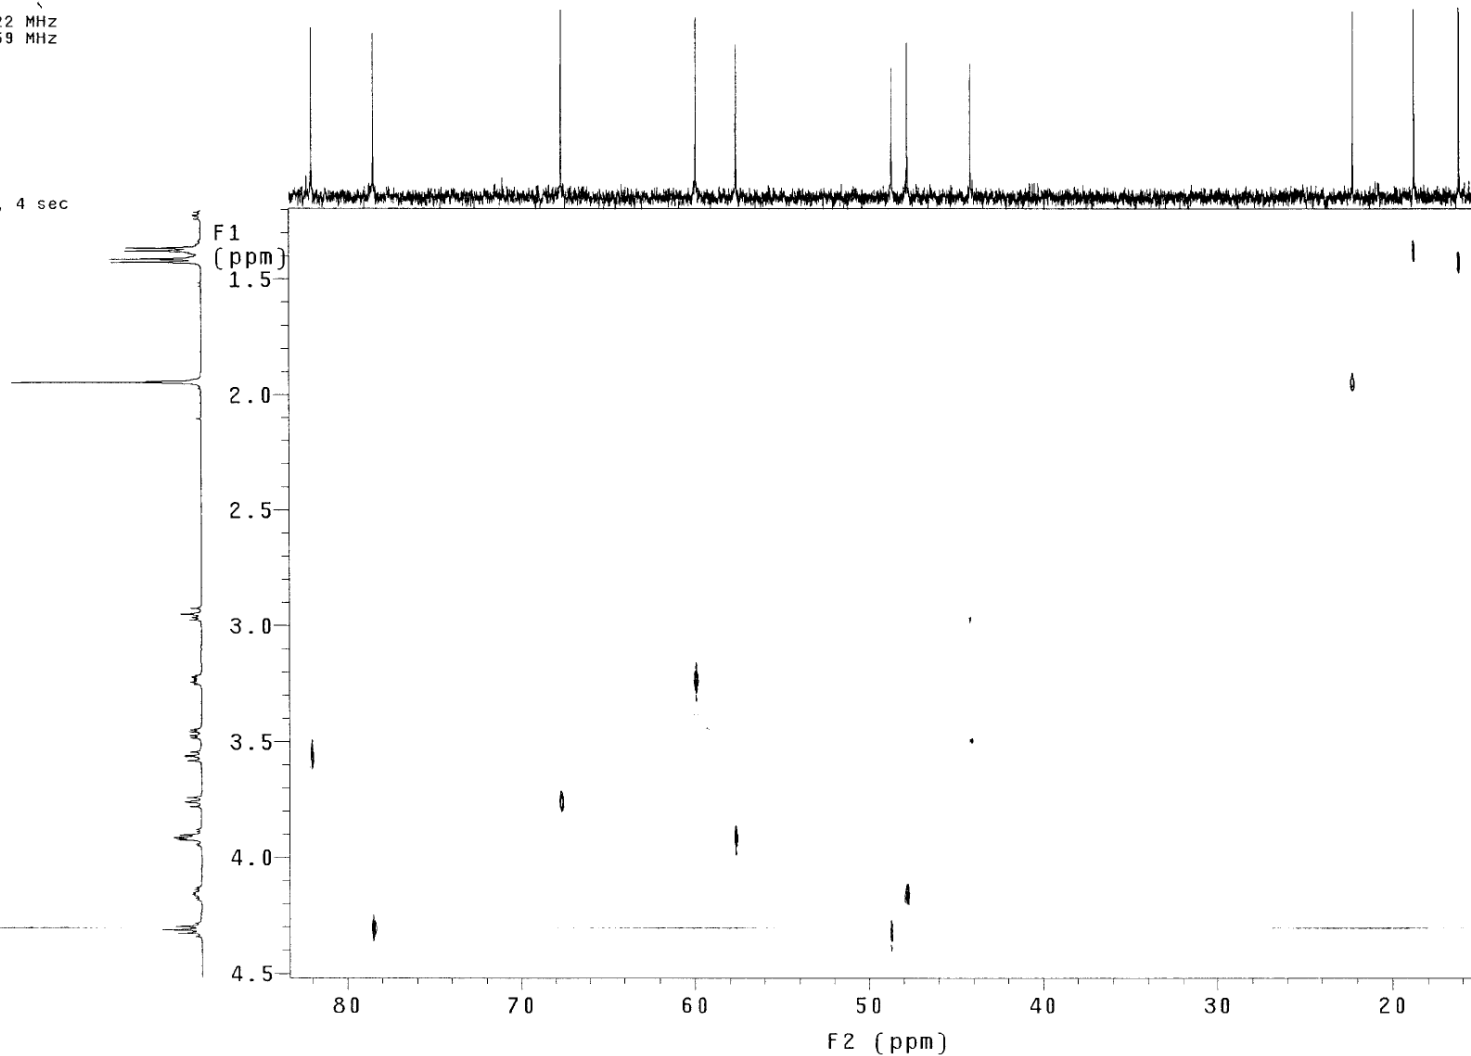

CH3 carbons

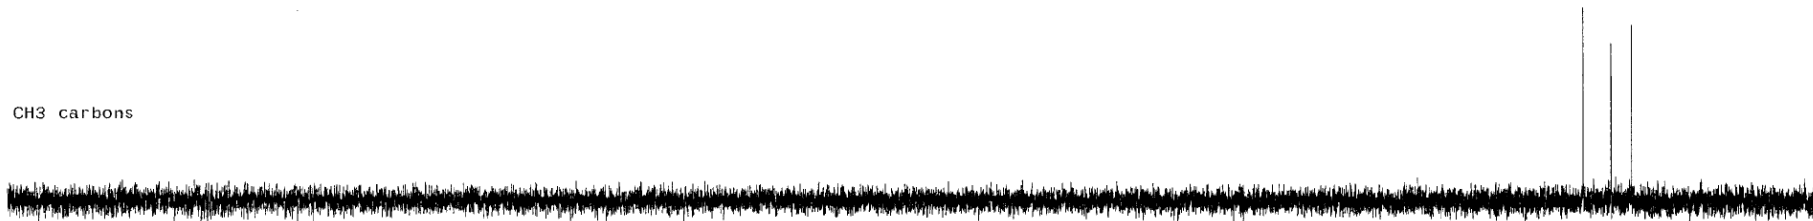

CH2 carbons

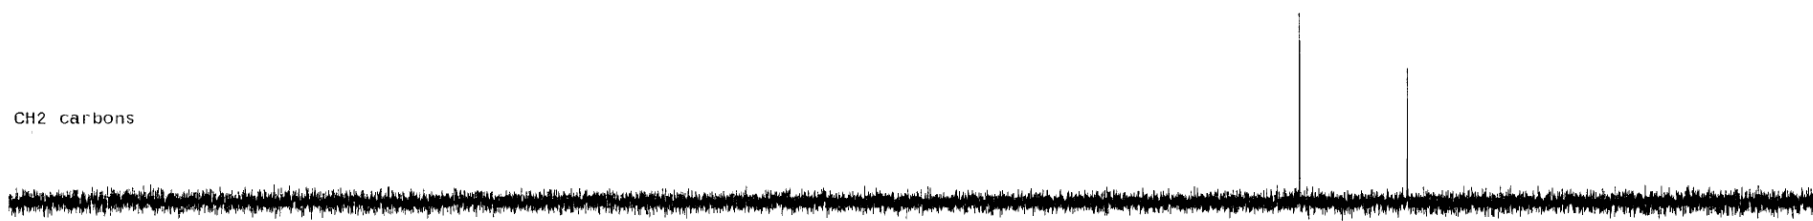

CH carbons

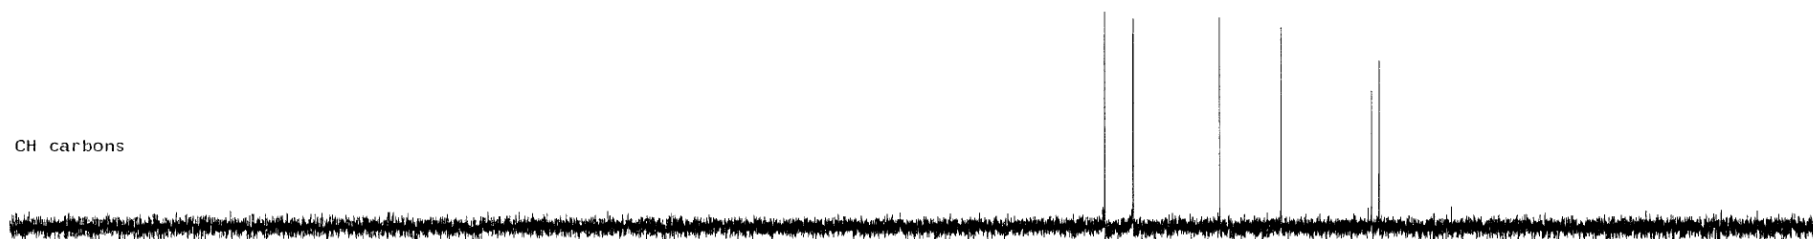

all protonated carbons

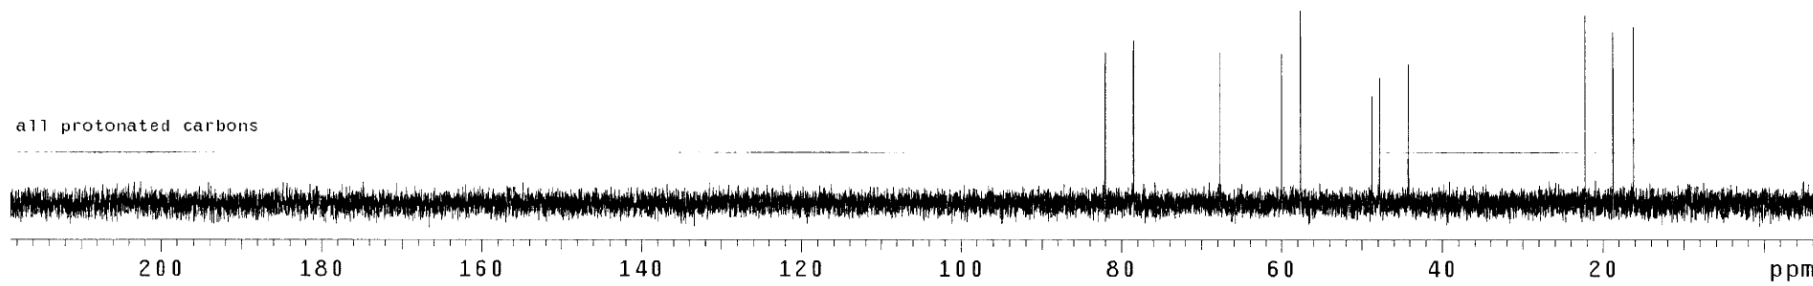

TY2-330

exp1 s2pu1

```
SAMPLE          DEC. & VT
date Apr 6 2009  dfrq      499.864
solvent CDC13    dn        H1
file      exp   dpwr      30
ACQUISITION     dof        0
sfrq      499.864 dm        nnn
tn         H1    dmm        c
at         5.016 dmf        200
np         65536 dseq
sw         6533.3 dres      1.0
fb         4000  homo      n
bs         4      DEC2
tpwr       61    dfrq2     0
pw         13.5 dn2
d1         0.100 dpwr2     1
tof        269.9 dof2     0
nt         16   dm2        n
ct         16   dmm2       c
alock      n    dmf2       200
gain      not used dseq2
FLAGS      n     dres2     1.0
           n     homo2     n
il         n      DEC3
in         n     dfrq3     0
dp         y     dn3
hs         nn    dpwr3     1
DISPLAY    dof3     0
sp        -107.0 dm3        n
wp        5107.9 dmm3       c
vs         36   dmf3       200
sc         0   dseq3
wc         250 dres3     1.0
hzmm       20.43 homo3     n
is         81.48
rf1        510.6 PROCESSING
rfp         0   wtfile
th         7   proc      ft
ins        4.000 fn        65536
ai         ph   math      f

werr
wexp      process pH
wbs
wnt      wft
```

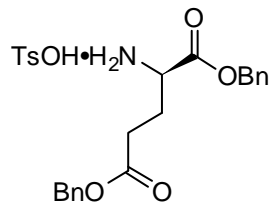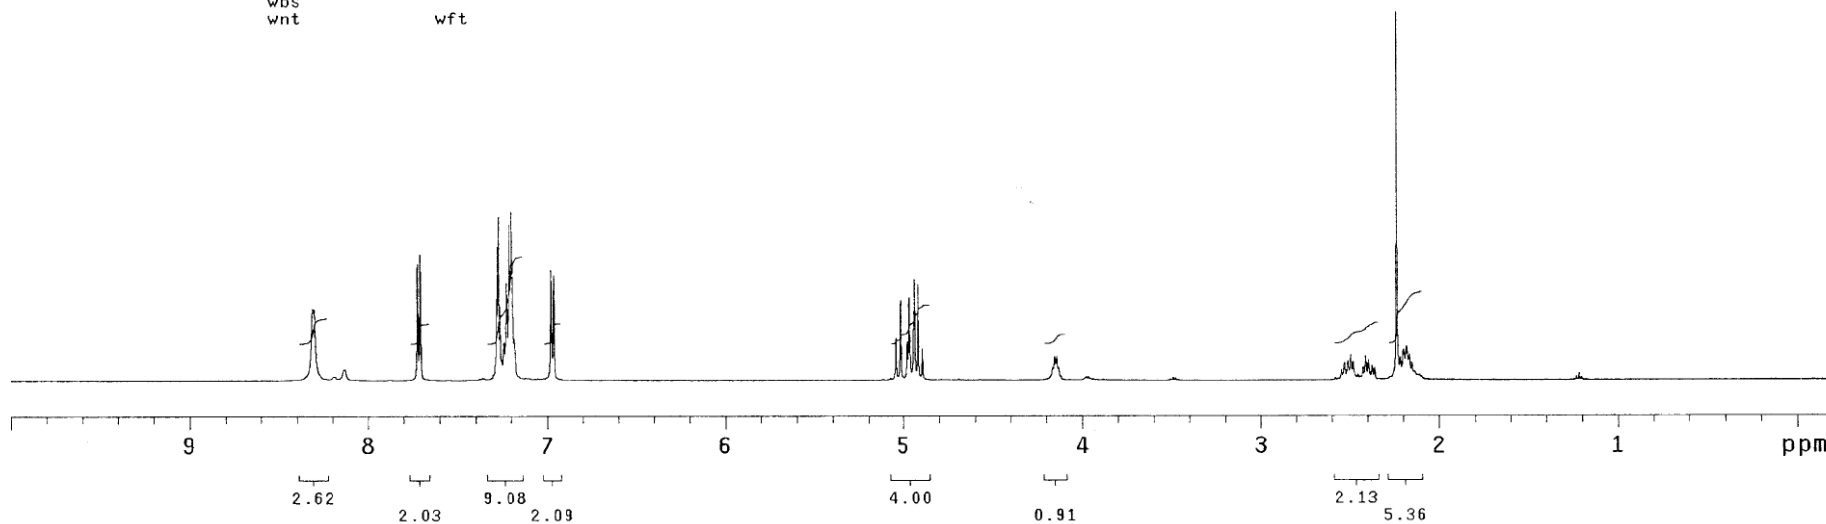

TY2-330

exp2 s2pu1

```
SAMPLE          DEC. & VT
date Apr 6 2009 dfrq      499.864
solvent CDC13      dn      H1
file exp      dpwr      40
ACQUISITION
sfrq 125.702 dm      yyy
tn C13 dmm      w
at 1.215 dmf      8787.35
np 65536 dseq
sw 26963.3 dres      1.0
fb 15000 homo
bs 4 DEC2
tpwr 52 dfrq2      0
pw 10.2 dn2
d1 1.800 dpwr2      1
tof 144.5 dof2      0
nt 3000 dm2      n
ct 120 dmm2      c
alock n dmf2      10000
gain not used dseq2
FLAGS dres2      1.0
il n homo2      n
in n DEC3
dp y dfrq3      0
hs nn dn3
DISPLAY dpwr3      1
sp -1403.9 dof3      0
wp 26962.9 dm3      n
vs 164 dmm3      c
sc 0 dmf3      10000
wc 250 dseq3
hzmm 107.85 dres3      1.0
is 500.00 homo3      n
rfl 11111.4 PROCESSING
rfp 9707.1 lb not used
th 8 wtfile
ins 100.000 proc ft
ai cdc ph fn 131072
math f
werr
wexp
wbs
wnt
```

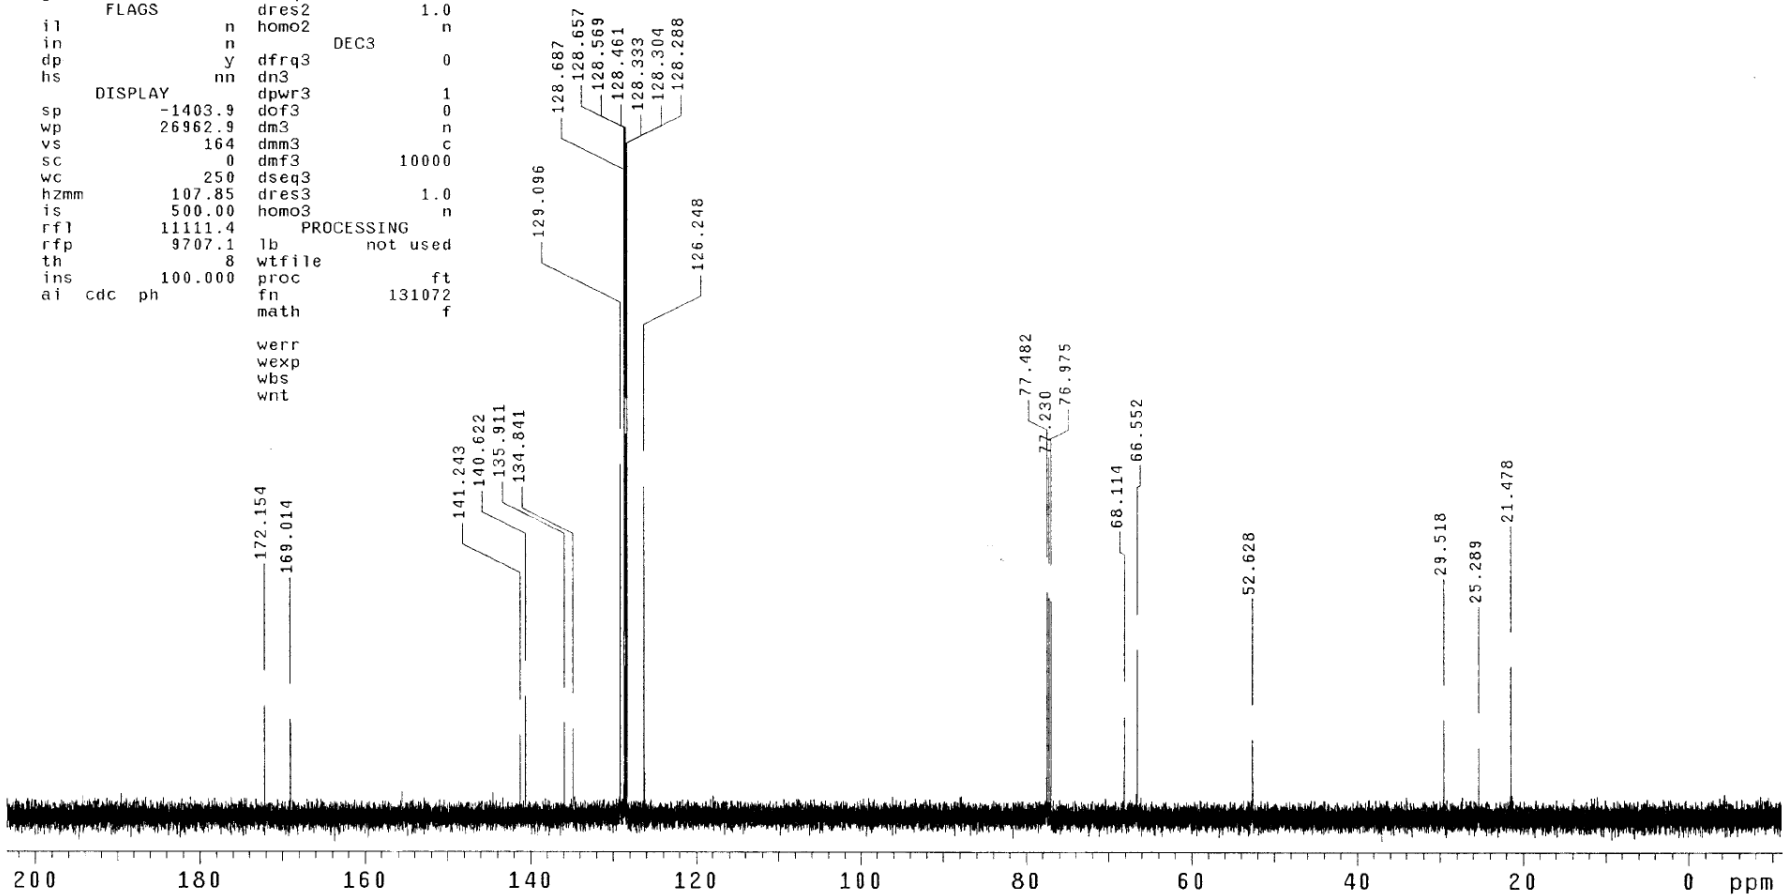

TY2-330

Pulse Sequence: relayh

Solvent: CDCl3  
Ambient temperature  
INOVA-500 "nmr2a.chem.nd.edu"

Relax. delay 1.300 sec  
COSY 90-90  
Acq. time 0.157 sec  
Width 6533.3 Hz  
2D Width 6533.3 Hz  
32 repetitions  
256 increments  
OBSERVE H1, 499.8611751 MHz  
DATA PROCESSING  
Sine bell 0.078 sec  
F1 DATA PROCESSING  
Sine bell 0.039 sec  
FT size 2048 x 2048  
Total time 3 hr, 23 min, 10 sec

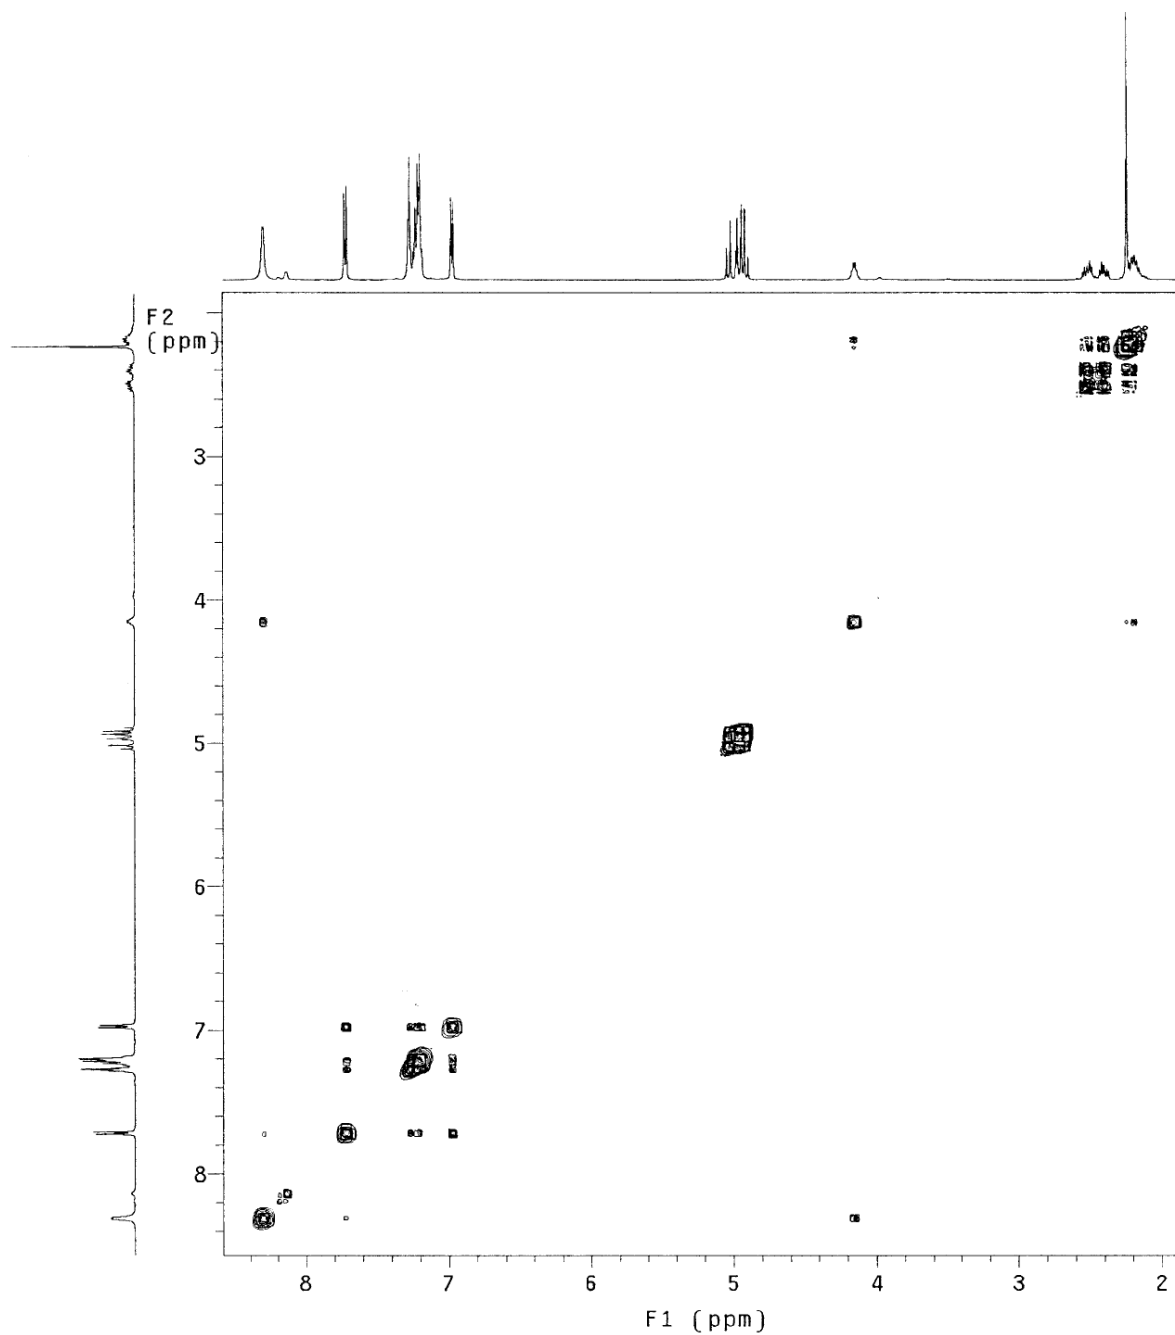

TY2-330

Pulse Sequence: hetcor

Solvent: CDCl3  
Ambient temperature  
User: 1-14-87  
File: TY2-330-CH  
INOVA-500 "nmr2a.chem.nd.edu"

Relax. delay 1.500 sec  
Acq. time 0.111 sec  
Width 18403.5 Hz  
2D Width 6533.3 Hz  
32 repetitions  
256 increments  
OBSERVE C13, 125.6901681 MHz  
DECOUPLE H1, 499.8639312 MHz  
Power 40 dB  
on during acquisition  
off during delay  
WALTZ-16 modulated  
DATA PROCESSING  
Line broadening 1.0 Hz  
F1 DATA PROCESSING  
Line broadening 0.3 Hz  
FT size 4096 x 1024  
Total time 3 hr, 46 min, 5 sec

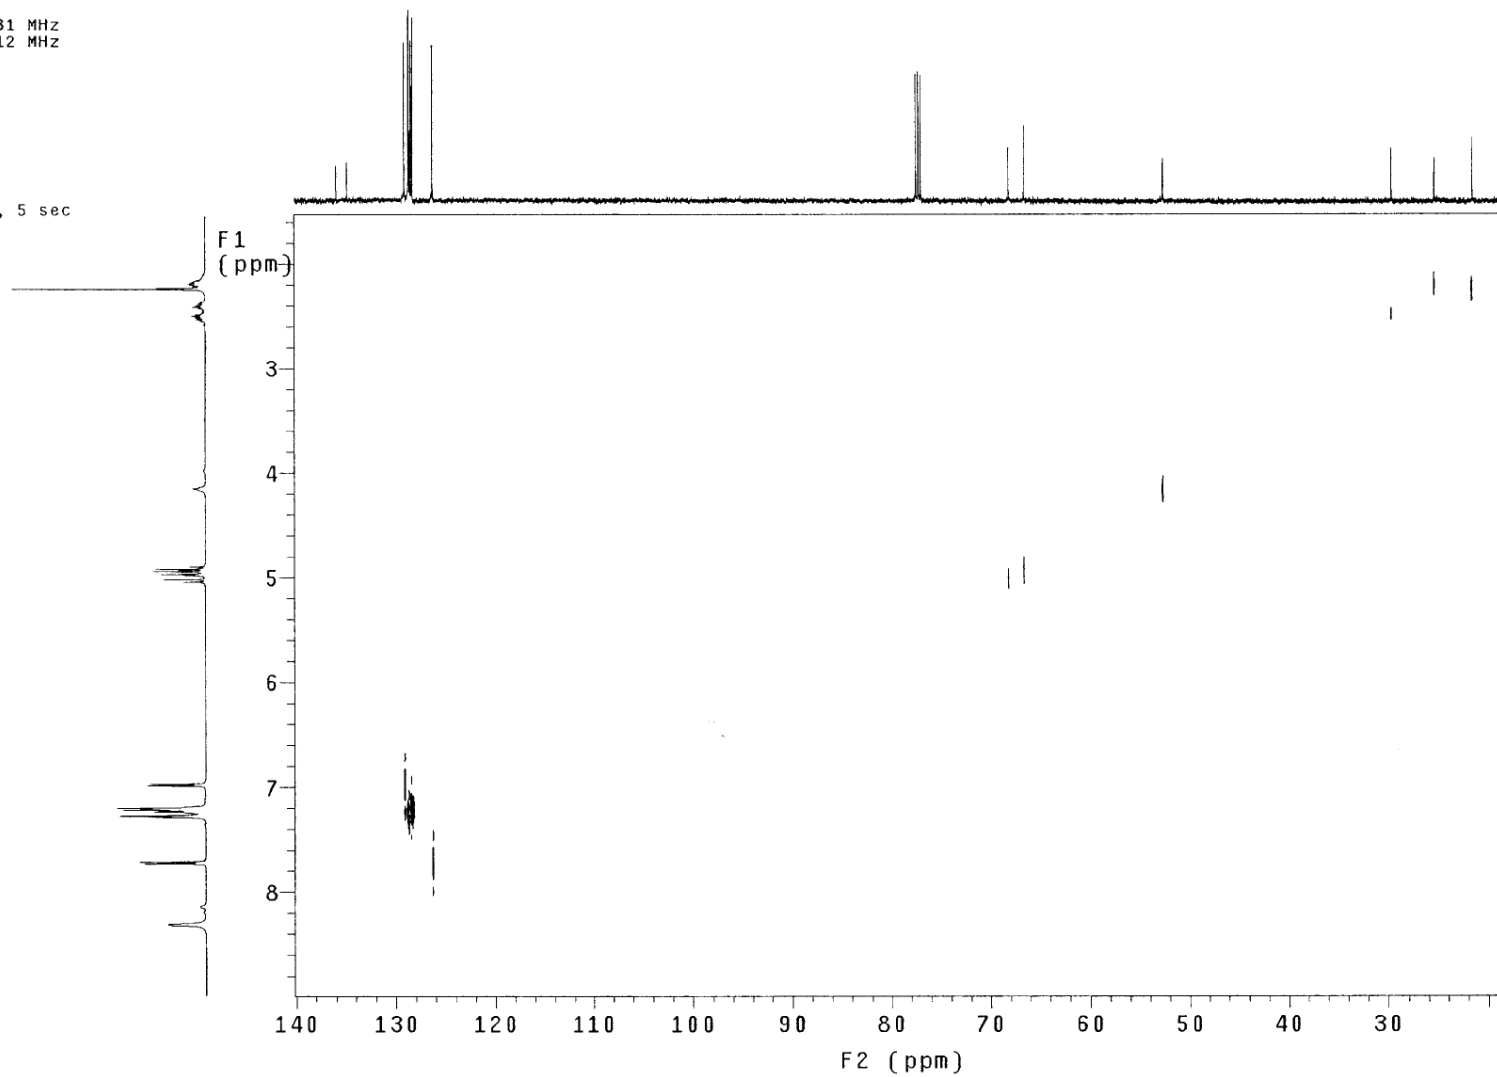

CH3 carbons

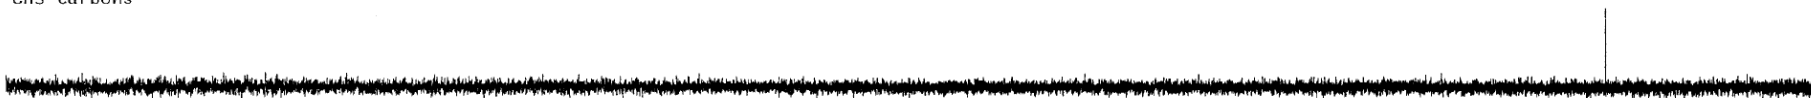

CH2 carbons

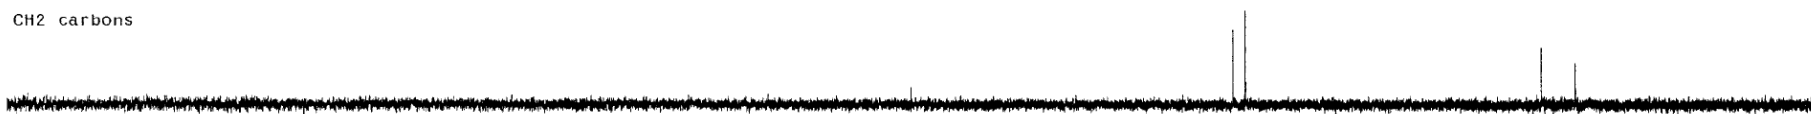

CH carbons

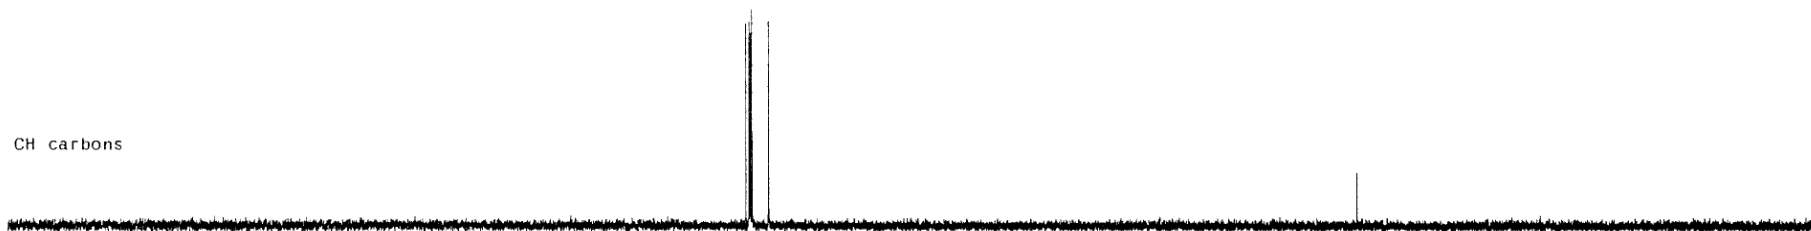

all protonated carbons

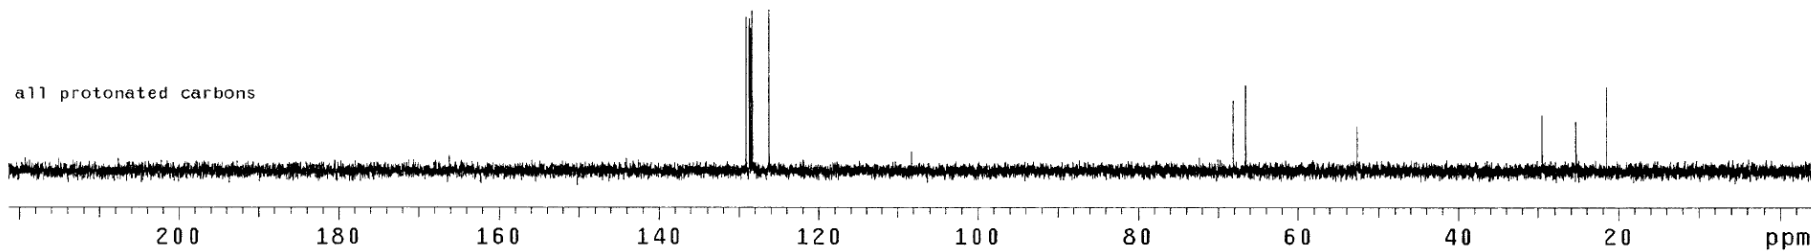

TY2-333

exp1 s2pu1

```
SAMPLE          DEC. & VT
date   Apr 11 2009  dfrq      499.864
solvent CDC13      dn        H1
file   exp        dpwr      30
ACQUISITION     dof       0
sfrq    499.864  dm         nnn
tn       H1      dmm        c
at       5.016   dmf       200
np       65536   dseq
sw       6533.3 dres      1.0
fb       4000   homo
bs              DEC2
tpwr      61    dfrq2     0
pw       13.5   dn2
d1       0.100 dpwr2     1
tof      269.9 dof2      0
nt       16    dm2        n
ct       16    dmm2       c
alock    n     dmf2       200
gain     not used dseq2
FLAGS      dres2     1.0
           homo2     n
           DEC3
in         n     dfrq3     0
dp         y     dn3
hs         nn    dpwr3     1
           dof3     0
           dm3      n
           dmm3     c
           dmf3     200
           dseq3
           dres3     1.0
           homo3     n
           PROCESSING
sp       -102.8  wtfile
wp       5099.3  proc      ft
vs       31     fn        65536
sc       0     math      f
wc       250
hzmm     20.40
is       172.93
rfl      4140.3
rfp      3634.0
th       7
ins      2.000
ai       ph

werr
wexp    process pH
wbs
wnt     wft
```

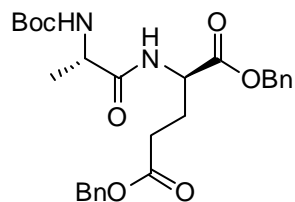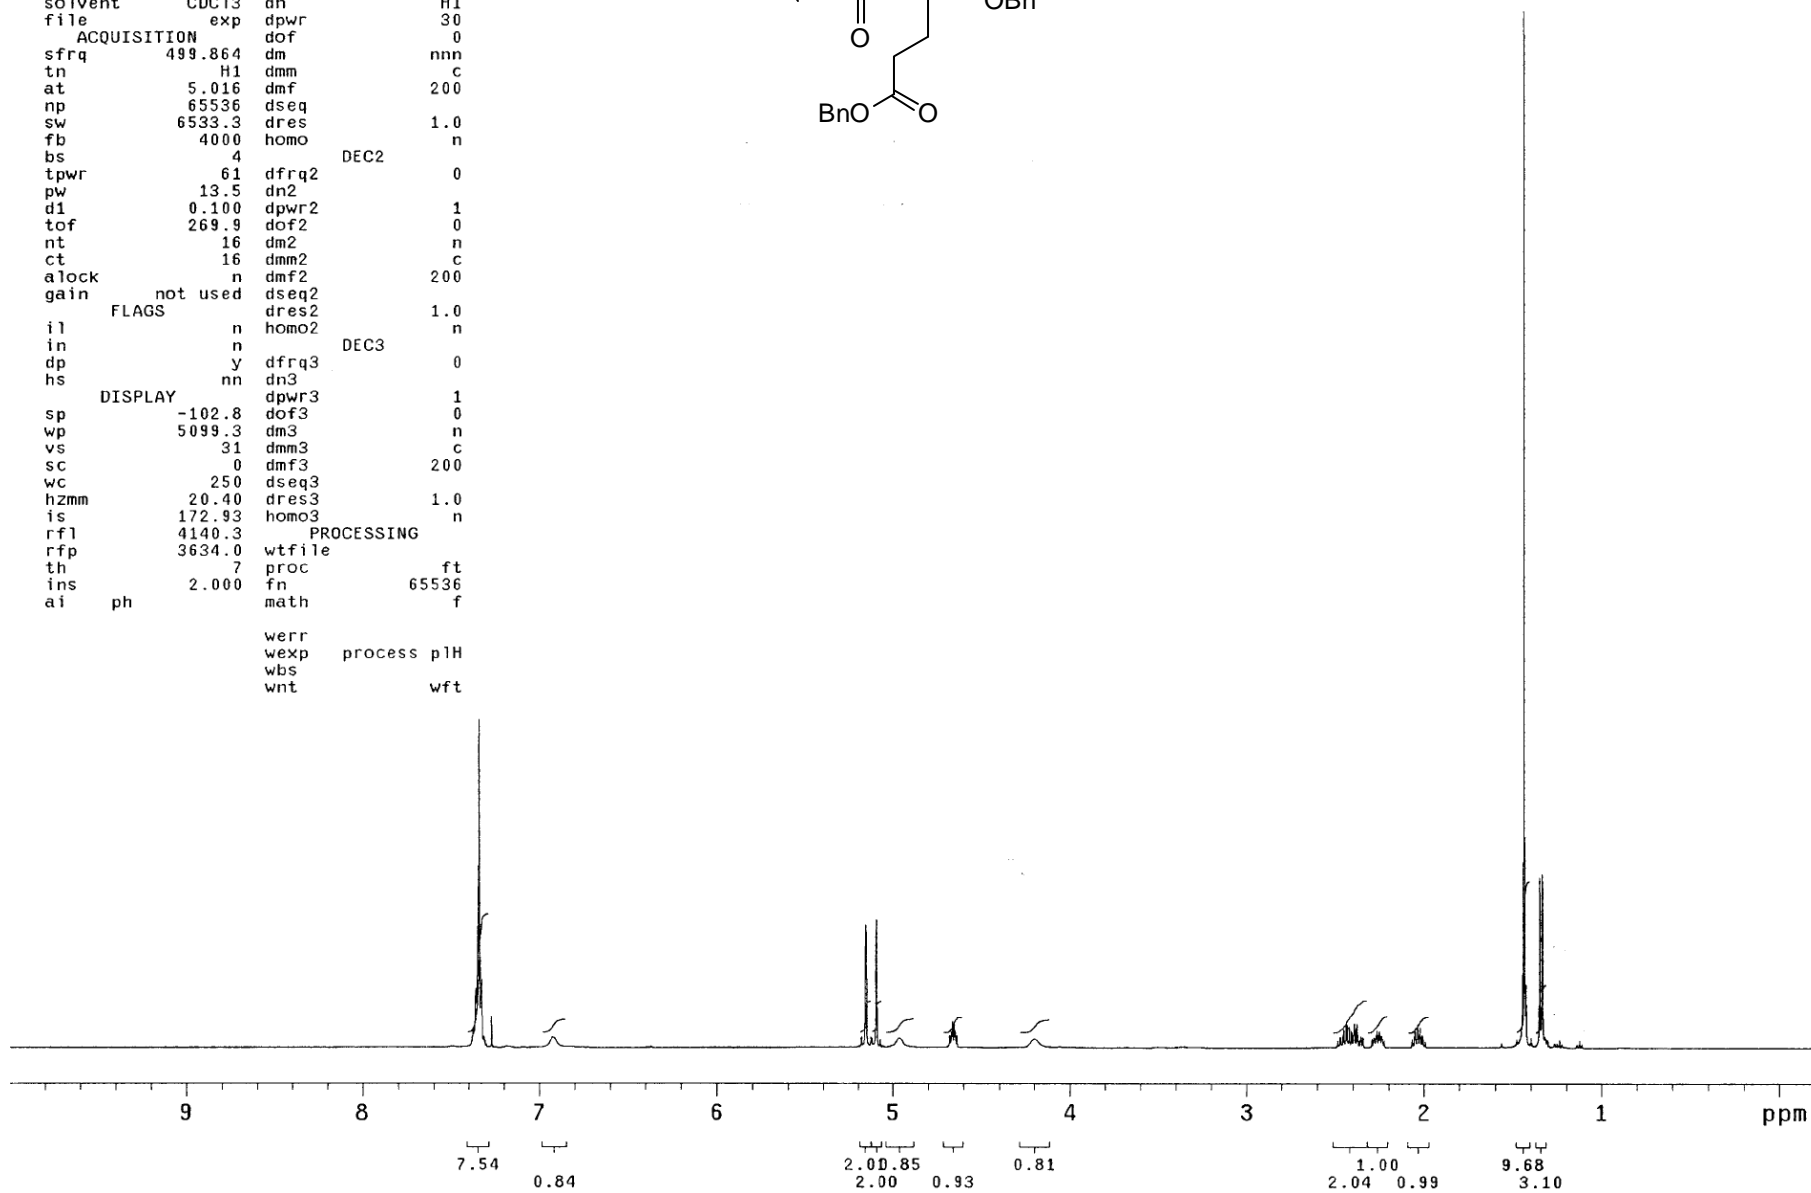



TY2-333

exp2 s2pu1

```
SAMPLE          DEC. & VT
date Apr 11 2009 dfrq      499.864
solvent CDC13     dn        H1
file          exp  dpwr      40
ACQUISITION    dof        0
sfrq         125.702 dm       yy
tn           C13   dmm       w
at           1.215 dmf       8787.35
np           65536 dseq
sw           26963.3 dres     1.0
fb           15000 homo      n
bs           4       DEC2
tpwr        52     dfrq2     0
pw          10.2   dn2
d1           1.800 dpwr2     1
tof          144.5 dof2     0
nt           3000 dm2       n
ct           280   dmm2     c
alock        n    dmf2     10000
gain         not used dseq2
FLAGS        n    homo2     1.0
in           n    DEC3
dp           y    dfrq3     0
hs          nn   dn3
DISPLAY      nn   dpwr3     1
sp          -1404.4 dof3     0
wp          26962.9 dm3       n
vs           511   dmm3     c
sc           0    dmf3     10000
wc           250   dseq3
hzmm        107.85 dres3     1.0
is           500.00 homo3     n
rfl         11111.8 PROCESSING
rfp         9707.1 lb         1.00
th           3    wtfile
ins         100.000 proc      ft
ai cdc ph      fn         131072
math         f
```

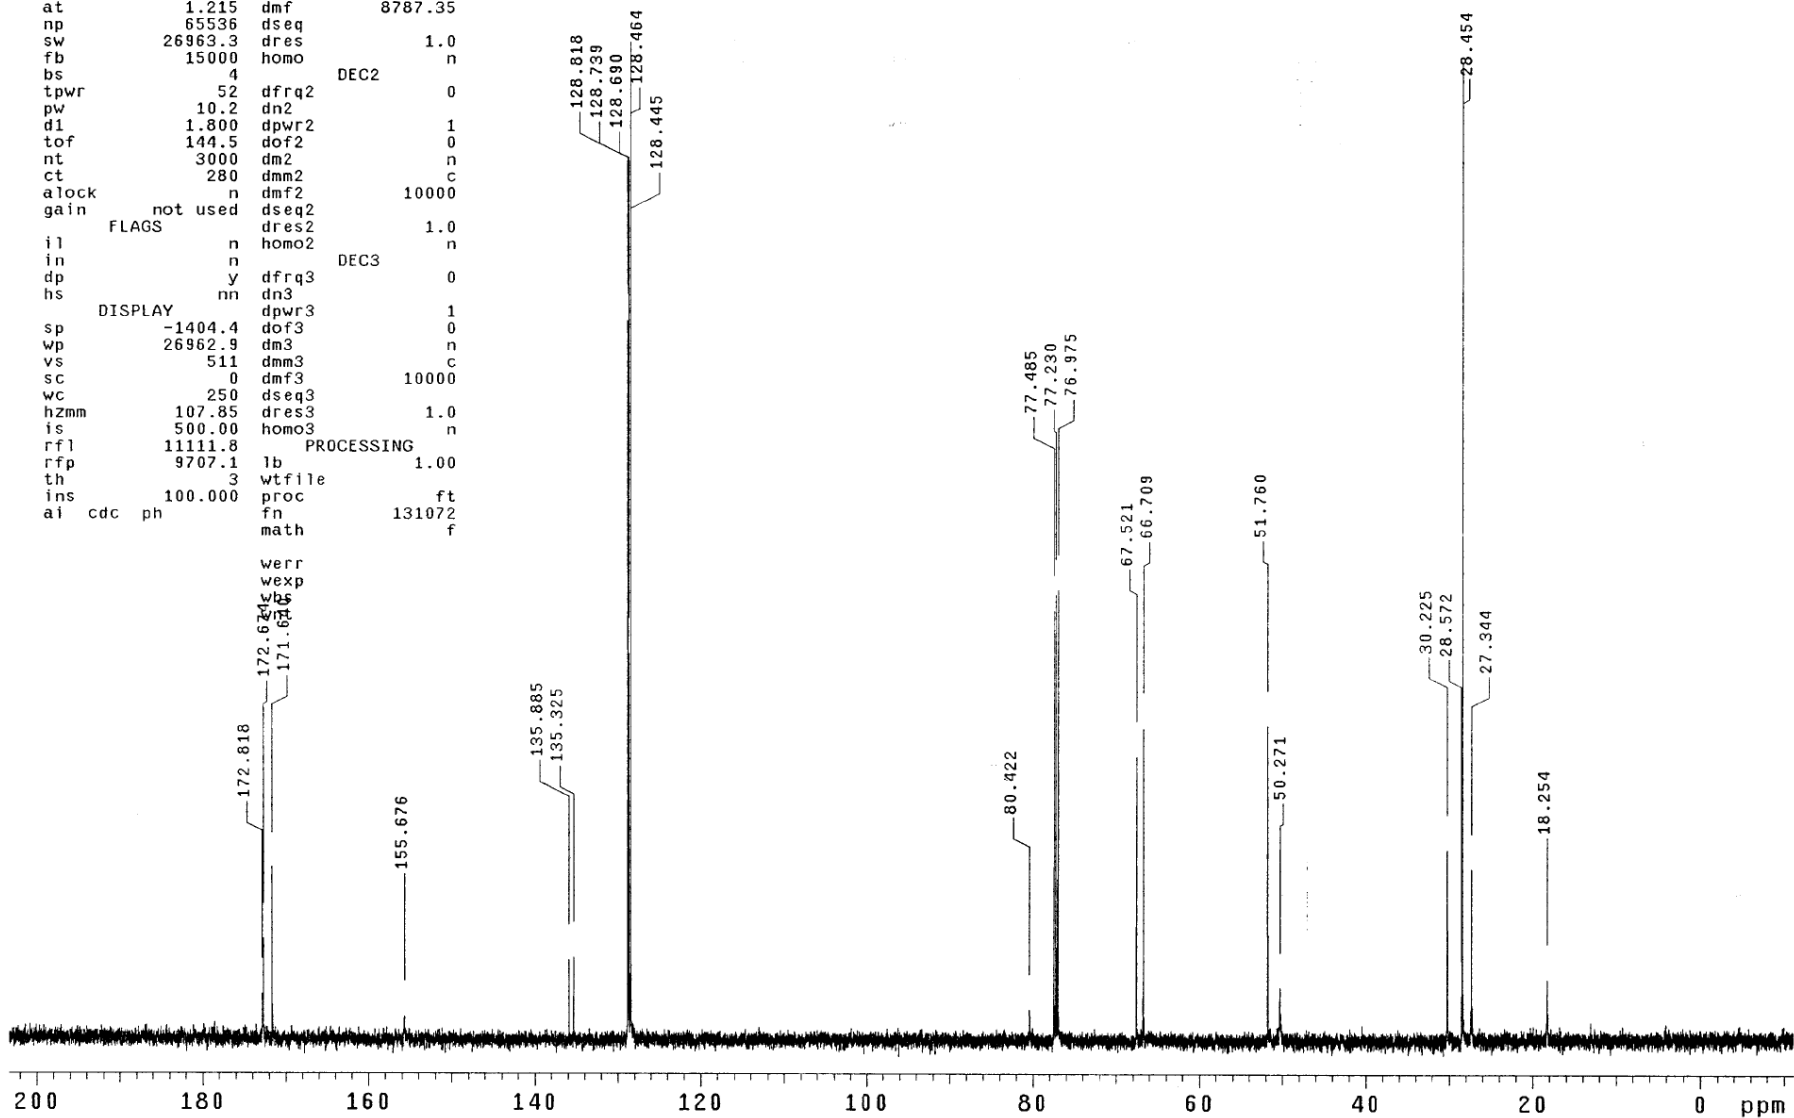

TY2-333

Pulse Sequence: relayh

Solvent: CDC13

Ambient temperature

INOVA-500 "nmr2a.chem.nd.edu"

Relax. delay 1.300 sec

COSY 90-90

Acq. time 0.157 sec

Width 6533.3 Hz

2D Width 6533.3 Hz

32 repetitions

256 increments

OBSERVE H1, 499.8611709 MHz

DATA PROCESSING

Sine bell 0.078 sec

F1 DATA PROCESSING

Sine bell 0.039 sec

FT size 2048 x 2048

Total time 3 hr, 23 min, 10 sec

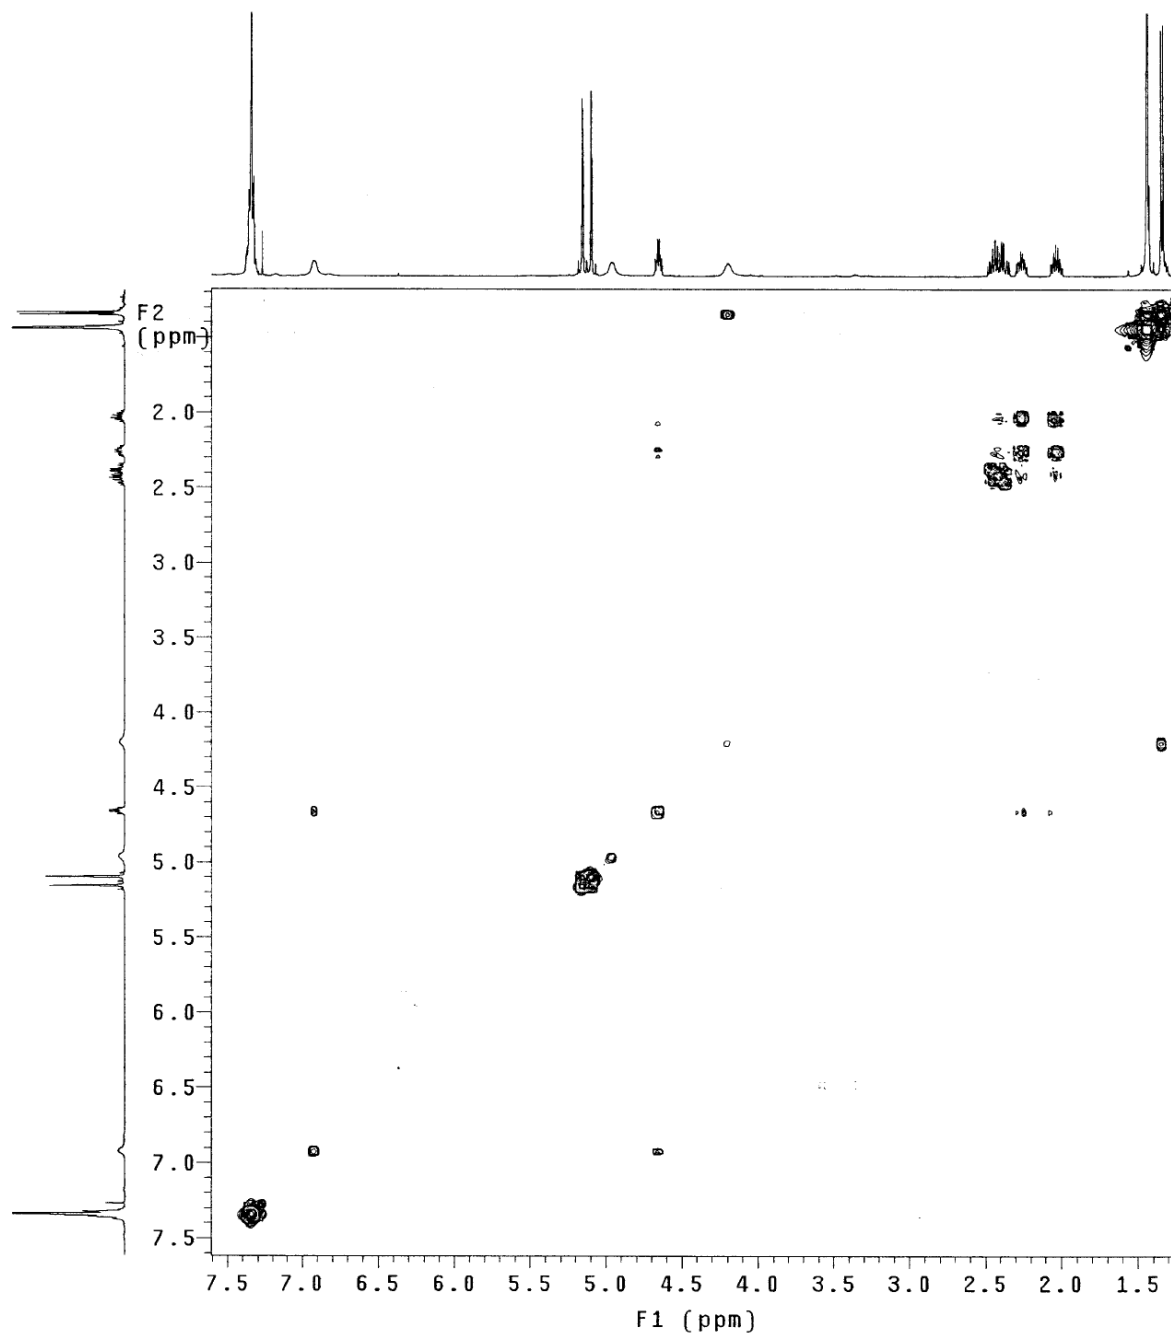

TY2-333

Pulse Sequence: hetcor

Solvent: CDC13

Ambient temperature

User: 1-14-87

INOVA-500 "nmr2a.chem.nd.edu"

Relax. delay 1.500 sec

Acq. time 0.111 sec

Width 18403.5 Hz

2D Width 6533.3 Hz

64 repetitions

256 increments

OBSERVE C13, 125.6901689 MHz

DECOUPLE H1, 499.8639312 MHz

Power 40 dB

on during acquisition

off during delay

WALTZ-16 modulated

DATA PROCESSING

Line broadening 1.0 Hz

F1 DATA PROCESSING

Line broadening 0.3 Hz

FT size 4096 x 1024

Total time 7 hr, 32 min, 4 sec

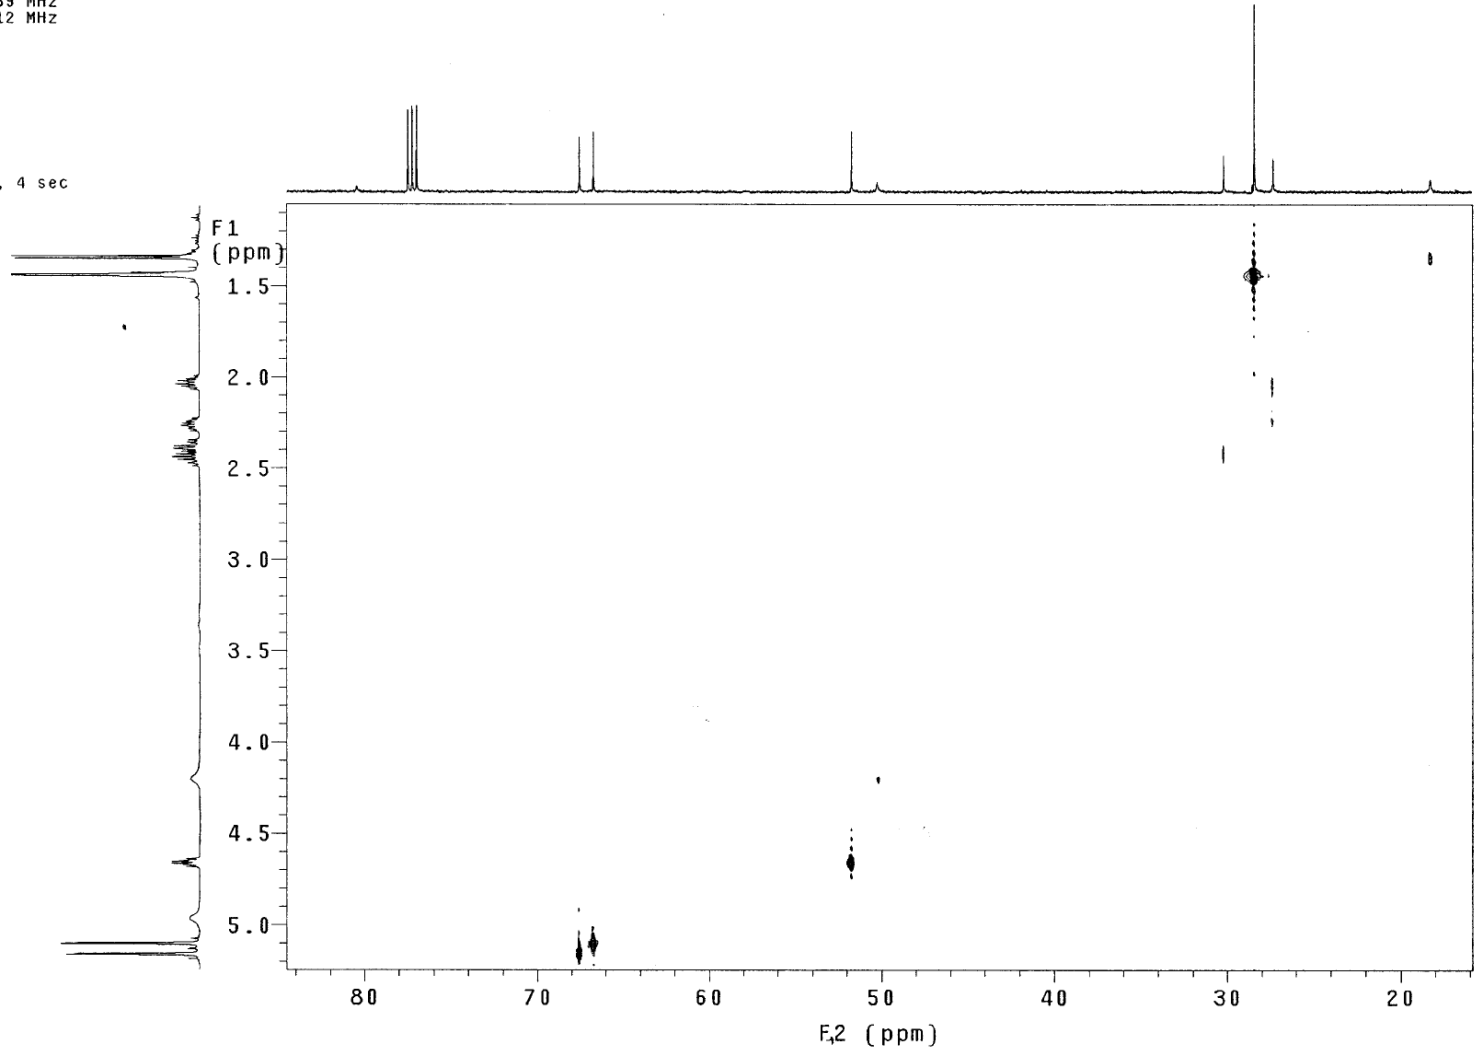

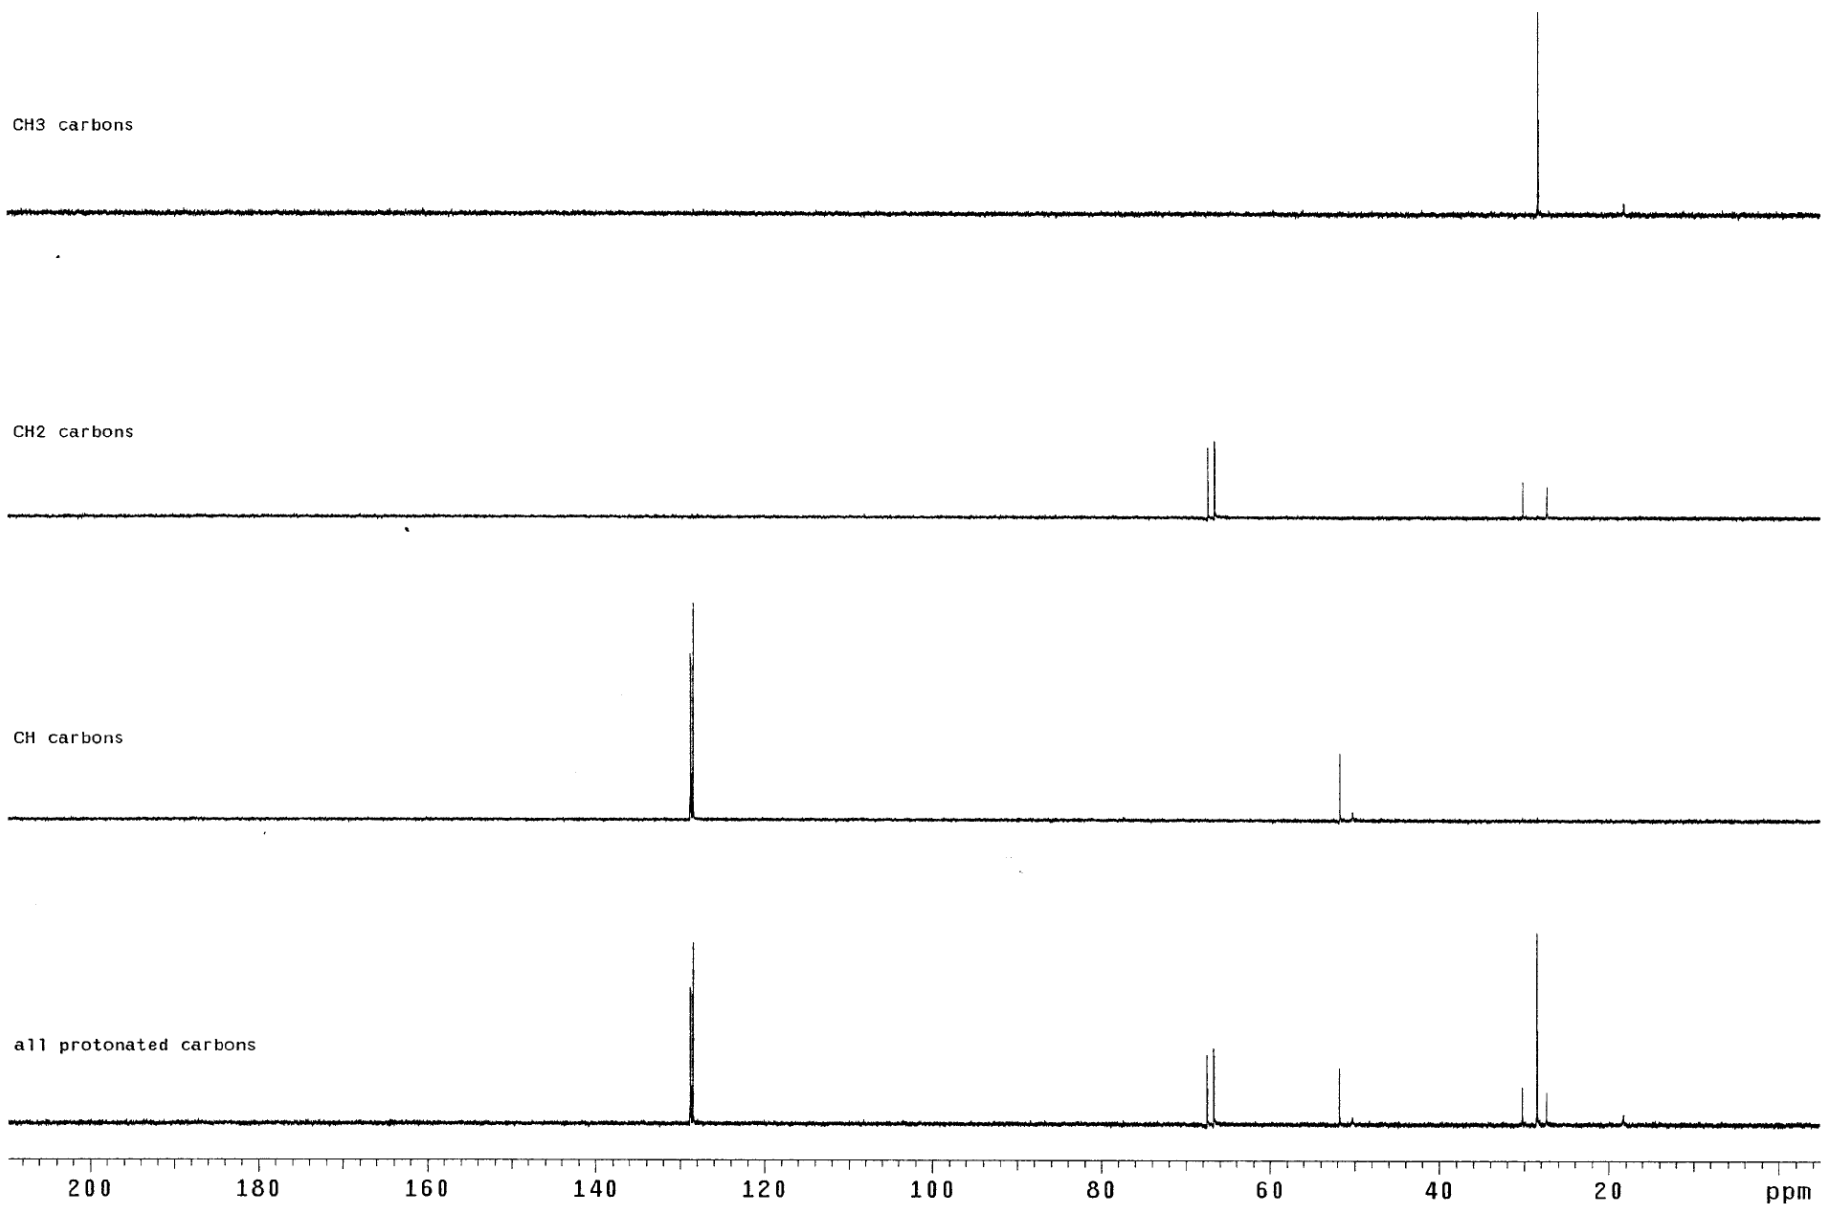

TY2-335

exp1 s2pu1

|             |             |           |         |
|-------------|-------------|-----------|---------|
| SAMPLE      |             | DEC. & VT |         |
| date        | Apr 19 2009 | dfrq      | 499.864 |
| solvent     | CDC13       | dn        | H1      |
| file        | exp         | dpwr      | 30      |
| ACQUISITION |             |           |         |
| sfrq        | 499.864     | dm        | nnn     |
| tn          | H1          | dmm       | c       |
| at          | 5.016       | dmf       | 200     |
| np          | 65536       | dseq      |         |
| sw          | 6533.3      | dres      | 1.0     |
| fb          | 4000        | homo      | n       |
| bs          | 4           | DEC2      |         |
| tpwr        | 61          | dfrq2     | 0       |
| pw          | 13.5        | dn2       |         |
| d1          | 0.100       | dpwr2     | 1       |
| tof         | 269.9       | dof2      | 0       |
| nt          | 4           | dm2       | n       |
| ct          | 4           | dmm2      | c       |
| alock       | n           | dmf2      | 200     |
| gain        | not used    | dseq2     |         |
| FLAGS       |             |           |         |
| il          | n           | dres2     | 1.0     |
| in          | n           | homo2     | n       |
| dp          | y           | DEC3      |         |
| hs          | nn          | dfrq3     | 0       |
| DISPLAY     |             |           |         |
| sp          | -107.0      | dn3       |         |
| wp          | 5107.9      | dpwr3     | 1       |
| vs          | 33          | dof3      | 0       |
| sc          | 0           | dm3       | n       |
| wc          | 250         | dmm3      | c       |
| hzmm        | 20.43       | dmf3      | 200     |
| is          | 44.70       | dseq3     |         |
| rfl         | 510.6       | dres3     | 1.0     |
| rfl         | 0           | homo3     | n       |
| PROCESSING  |             |           |         |
| th          | 7           | wtfile    |         |
| ins         | 10.000      | proc      | ft      |
| ai          | ph          | fn        | 65536   |
|             |             | math      | f       |
|             | werr        |           |         |
|             | wexp        | process   | pH      |
|             | wbs         |           |         |
|             | wnt         | wft       |         |

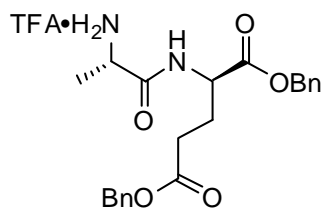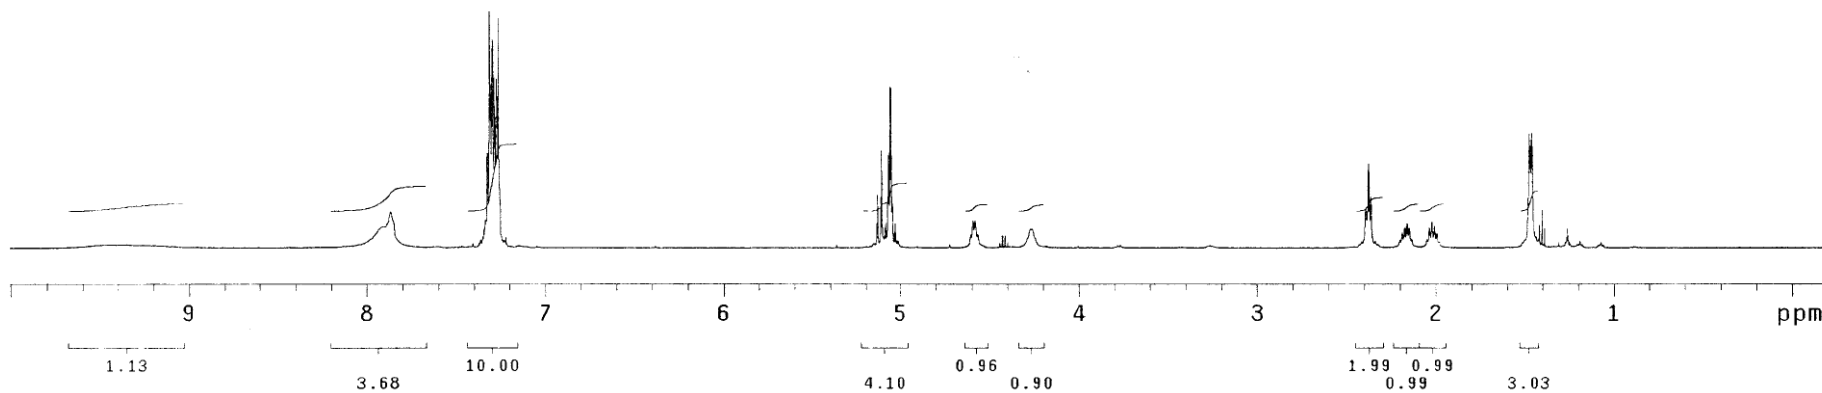

TY2-335

exp2 s2pu1

```
SAMPLE          DEC. & VT
date Apr 19 2009 dfrq      499.864
solvent CDC13    dn        H1
file exp        dpwr      40
ACQUISITION
sfrq 125.702    dm        yyy
tn C13          dmm        w
at 1.215       dmf        8787.35
np 65536       dseq
sw 26963.3     dres      1.0
fb 15000       homo      n
bs 4           DEC2
tpwr 52        dfrq2     0
pw 10.2        dn2
d1 1.800       dpwr2     1
tof 144.5      dof2     0
nt 5000       dm2      n
ct 291        dmm2     c
alock n        dmf2     10000
gain not used  dseq2
FLAGS          dres2     1.0
il n          homo2
ln n          DEC3
dp y          dfrq3     0
hs nn        dn3
DISPLAY
sp -1401.1     dpwr3     1
wp 26962.9    dof3     0
vs 417        dm3      n
sc 0          dmm3     c
wc 250        dmf3     10000
hzmm 107.85   dseq3
is 500.00     dres3     1.0
rfl 11108.5   homo3     n
rfp 9707.1    lb        1.00
th 3          wtfile
ins 100.000   proc      ft
ai cdc ph    fn        131072
              math      f
              werr
              wexp
              wbs
              wnt
```

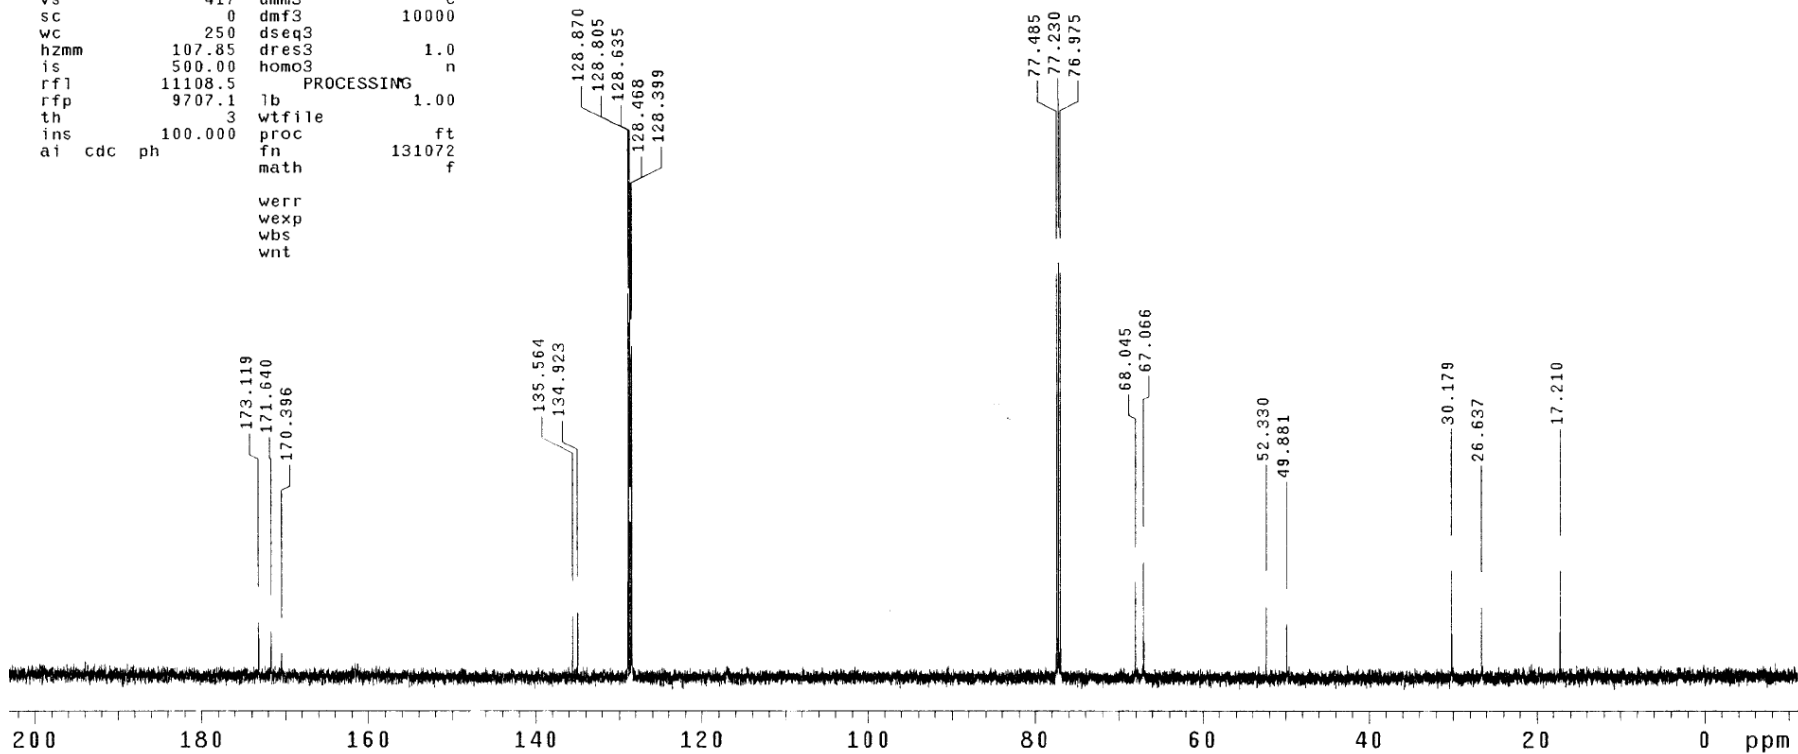

TY2-335

Pulse Sequence: relayh

Solvent: CDC13  
Ambient temperature  
INOVA-500 "nmr2a.chem.nd.edu"

Relax. delay 1.300 sec  
COSY 90-90  
Acq. time 0.157 sec  
Width 6533.3 Hz  
2D Width 6533.3 Hz  
32 repetitions  
256 increments  
OBSERVE H1, 499.8611751 MHz  
DATA PROCESSING  
Sine bell 0.078 sec  
F1 DATA PROCESSING  
Sine bell 0.039 sec  
FT size 2048 x 2048  
Total time 3 hr, 23 min, 10 sec

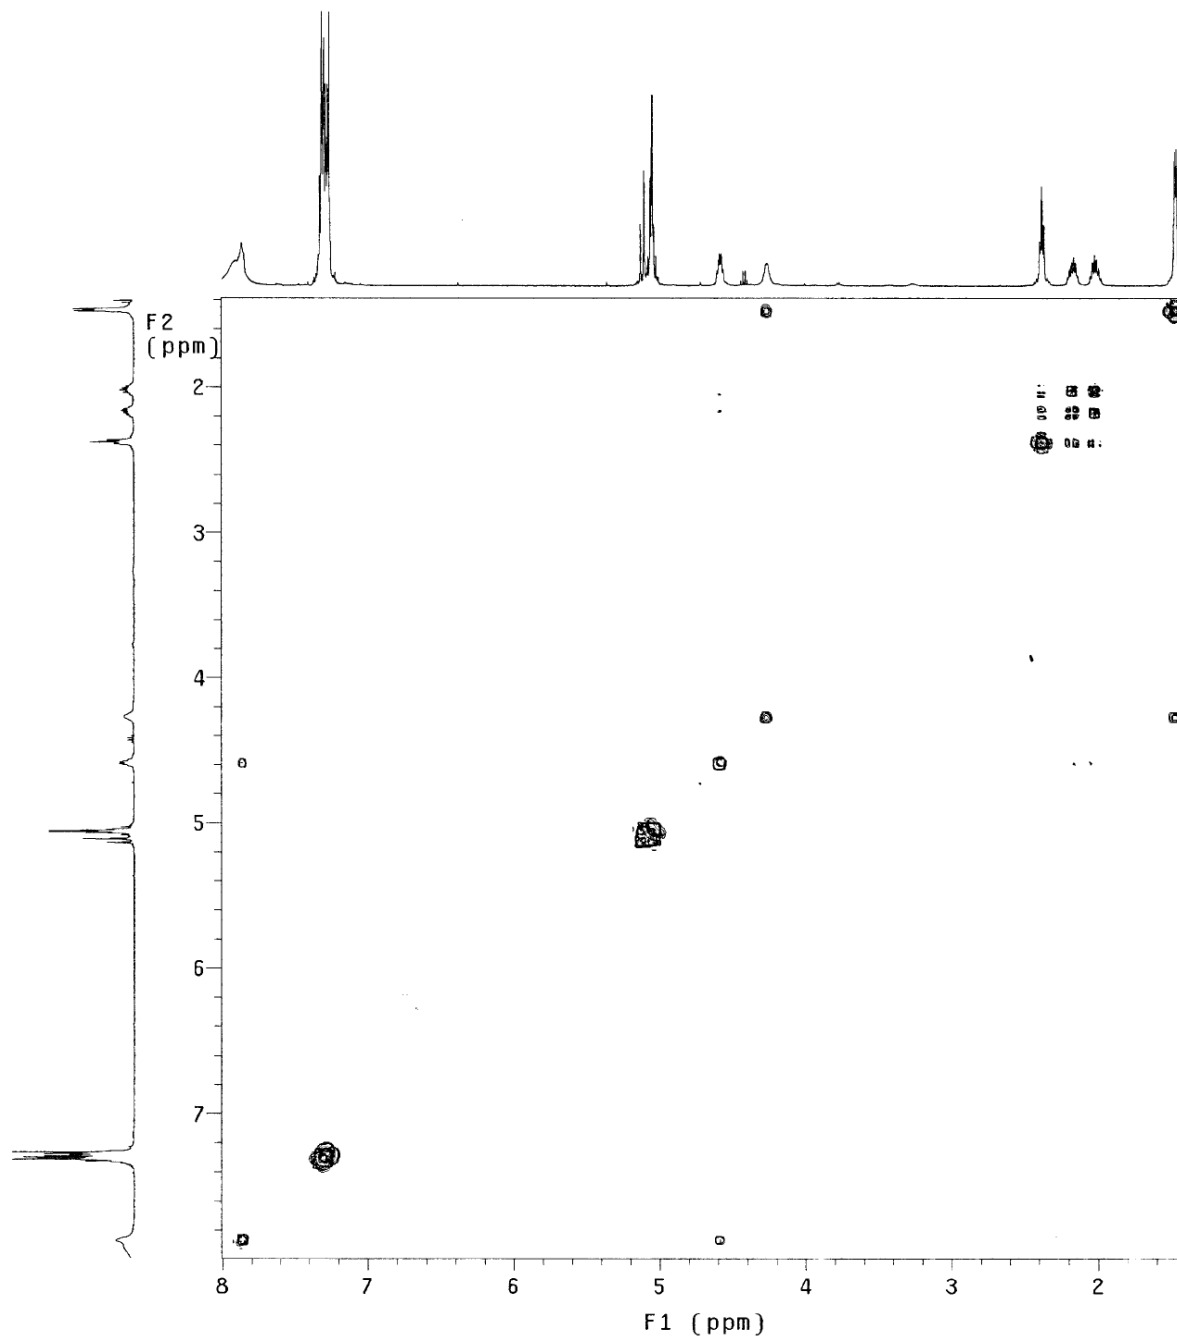

TY2-335

Pulse Sequence: hetCOR

Solvent: CDC13

Ambient temperature

User: 1-14-87

INNOVA-500 "nmr2a.chem.nd.edu"

Relax. delay 1.500 sec

Acq. time 0.111 sec

Width 18403.5 Hz

2D Width 6533.3 Hz

64 repetitions

256 increments

OBSERVE C13, 125.6901656 MHz

DECOUPLE H1, 499.8639312 MHz

Power 40 dB

on during acquisition

off during delay

WALTZ-16 modulated

DATA PROCESSING

Line broadening 1.0 Hz

F1 DATA PROCESSING

Line broadening 0.3 Hz

FT size 4096 x 1024

Total time 7 hr, 32 min, 4 sec

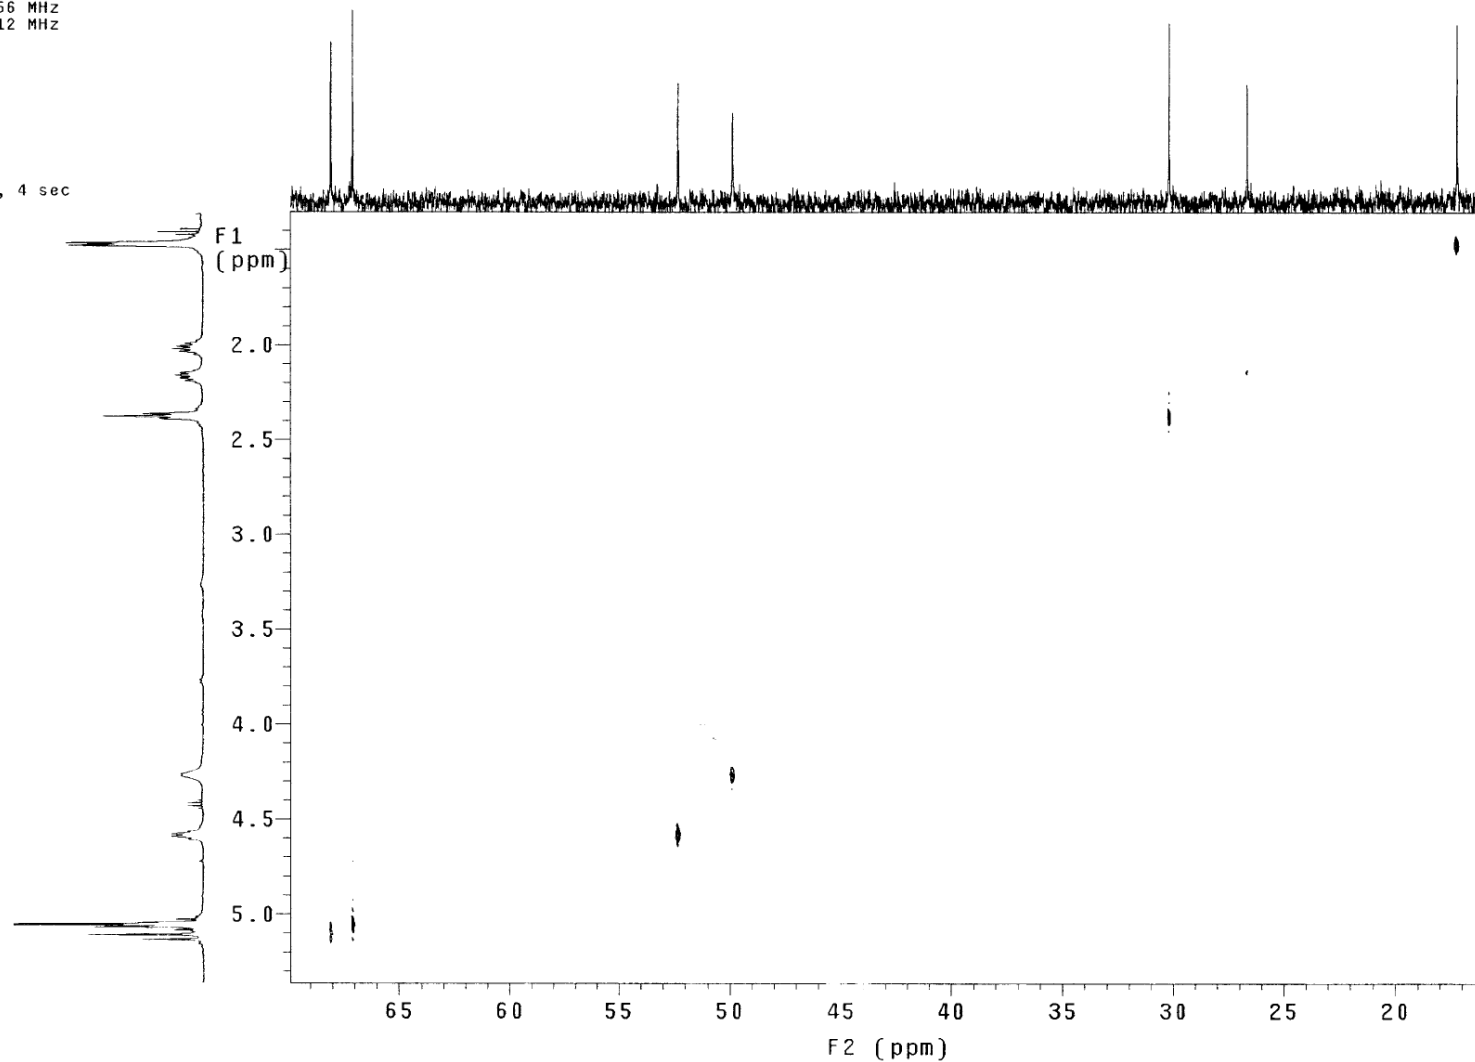



CH3 carbons

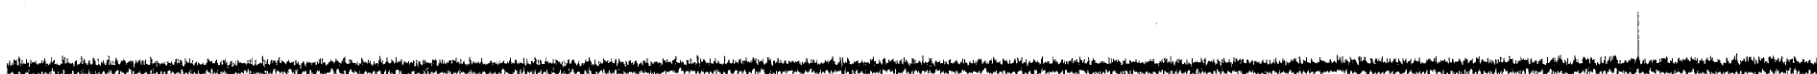

CH2 carbons

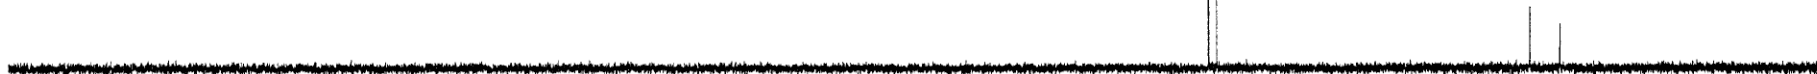

CH carbons

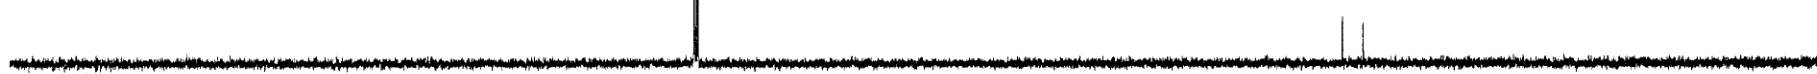

all protonated carbons

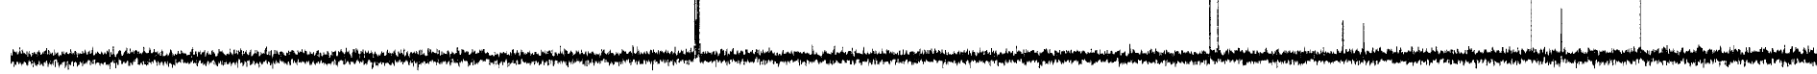

200

180

160

140

120

100

80

60

40

20

ppm

TY2-348

exp1 s2pu1

```
SAMPLE      DEC. & VT
date May 8 2009 dfrq 499.864
solvent CDC13 dn H1
file exp dpwr 30
ACQUISITION dof 0
sfrq 499.864 dm nnn
tn H1 dmm c
at 5.016 dmf 200
np 65536 dseq
sw 6533.3 dres 1.0
fb 4000 homo n
bs 4 DEC2
tpwr 61 dfrq2 0
pw 13.5 dn2
d1 0.100 dpwr2 1
tof 269.9 dof2 0
nt 32 dm2 n
ct 32 dmm2 c
alock n dmf2 200
gain not used dseq2
FLAGS dres2 1.0
      n homo2 n
      in n DEC3
      dp y dfrq3 0
      hs nn dn3
DISPLAY dpwr3 1
      sp -102.6 dof3 0
      wp 5099.3 dm3 n
      vs 87 dmm3 c
      sc 0 dmf3 200
      wc 250 dseq3
      hzmm 20.40 dres3 1.0
      is 88.14 homo3 n
      rfl 4140.1 PROCESSING
      rfp 3634.0 wfile
      th 7 proc ft
      ins 1.000 fn 65536
      ai ph math f
      werr
      wexp process pH
      wbs
      wnt wft
```

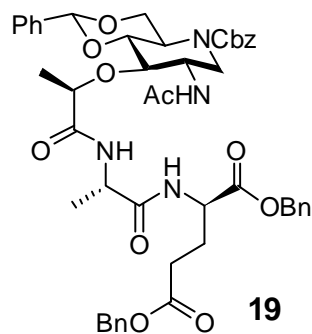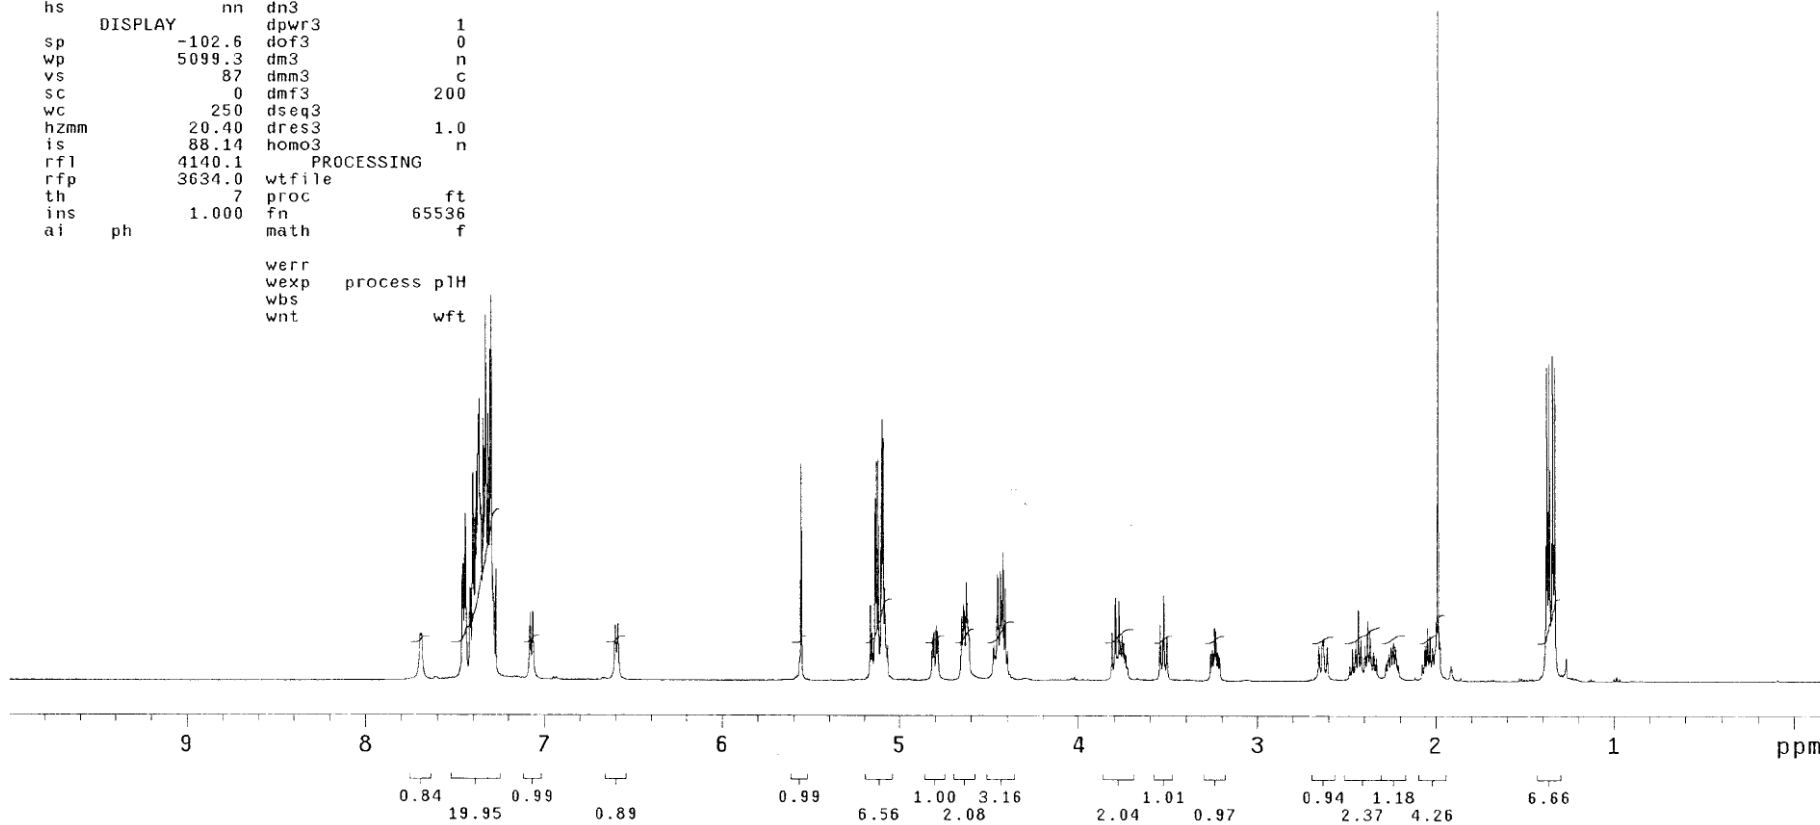

TY2-348

exp2 s2pu1

```
SAMPLE          DEC. & VT
date May 8 2009  dfrq      499.864
solvent CDC13    dn        H1
file exp        dpwr      40
ACQUISITION
sfrq 125.702    dm         yyy
tn C13          dmm        w
at 1.215       dmf        8787.35
np 65536       dseq
sw 26963.3     dres      1.0
fb 15000       homo      n
bs 4           DEC2
tpwr 52        dfrq2     0
pw 10.2        dn2
d1 1.800       dpwr2     1
tof 144.5      dof2      0
nt 10000      dm2       n
ct 236        dmm2      c
alock n        dmf2     10000
gain not used  dseq2
FLAGS          dres2     1.0
il n          homo2    n
in n          DEC3
dp y          dfrq3     0
hs nn        dn3
DISPLAY
sp -1406.8     dof3      0
wp 26962.9    dm3       n
vs 344        dmm3      c
sc 0          dmf3     10000
wc 250        dseq3
hzmm 107.85   dres3     1.0
is 500.00    homo3    n
rfl 11114.3  PROCESSING
rfp 9707.1   lb        1.0
th 5         wfile
ins 100.000  proc      ft
ai cdc ph   fn       131072
           math      r
           werr
           wexp
           wbs
           wnt
```

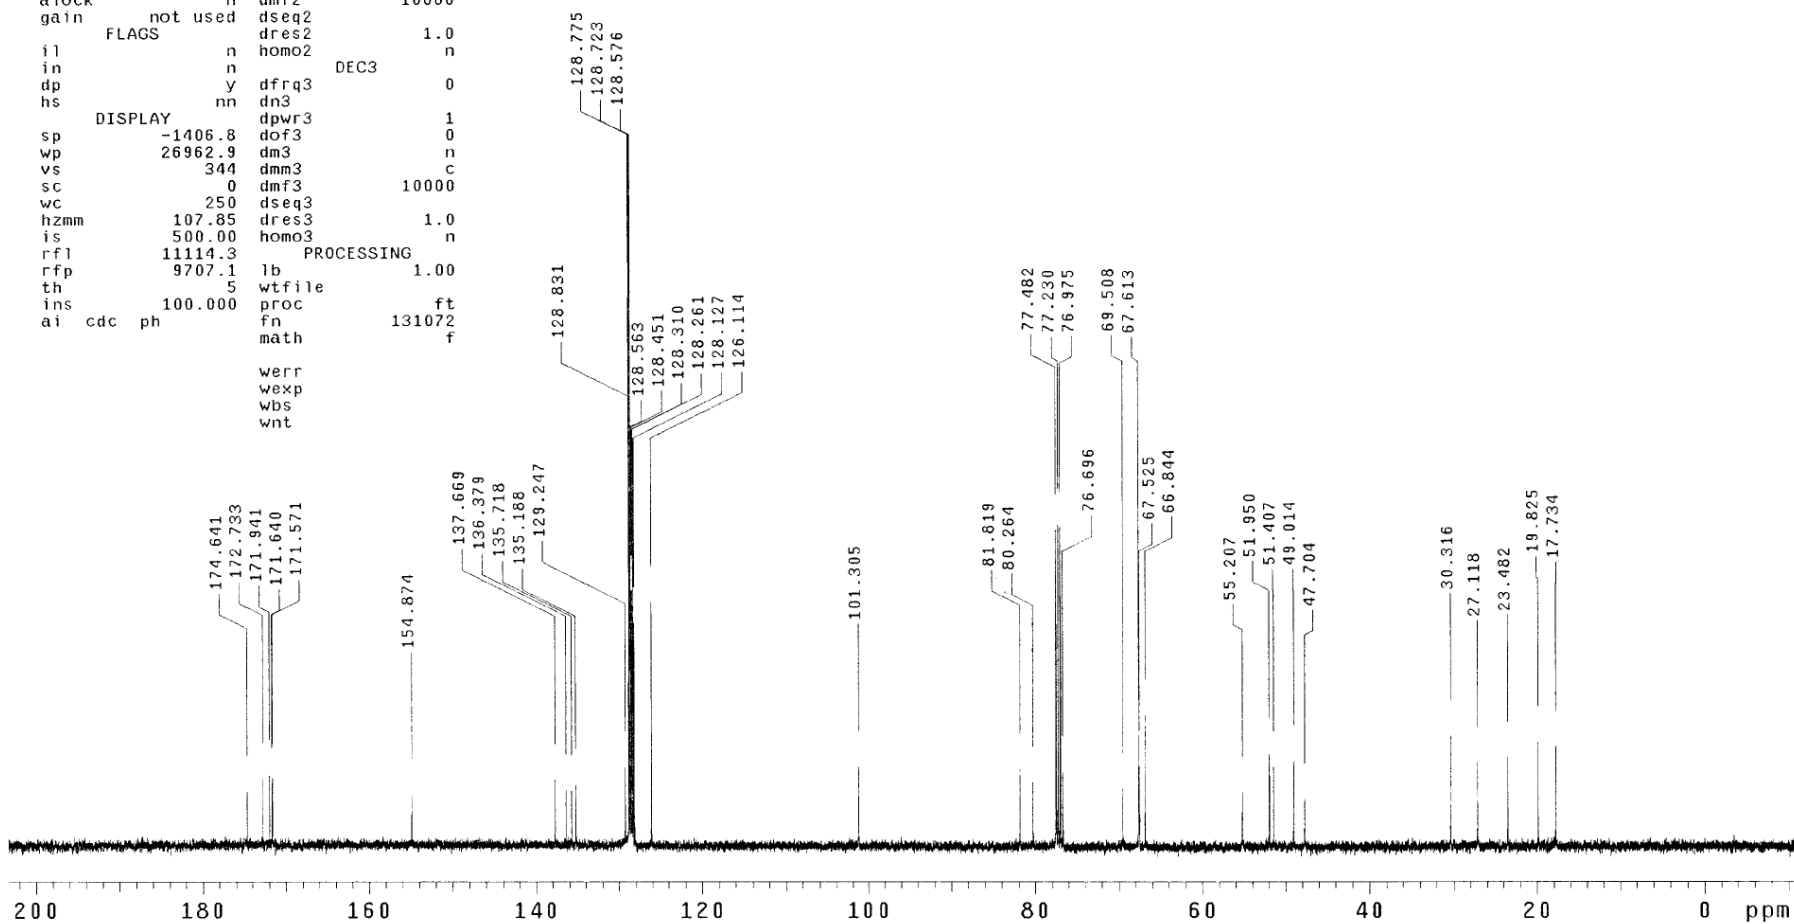

TY2-348

Pulse Sequence: relayh  
Solvent: CDC13  
Ambient temperature  
INOVA-500 "nmr2a.chem.nd.edu"

Relax. delay 1.300 sec  
COSY 90-90  
Acq. time 0.157 sec  
Width 6533.3 Hz  
2D Width 6533.3 Hz  
64 repetitions  
256 increments  
OBSERVE H1, 499.8611707 MHz  
DATA PROCESSING  
Sine bell 0.078 sec  
F1 DATA PROCESSING  
Sine bell 0.039 sec  
FT size 2048 x 2048  
Total time 6 hr, 46 min, 8 sec

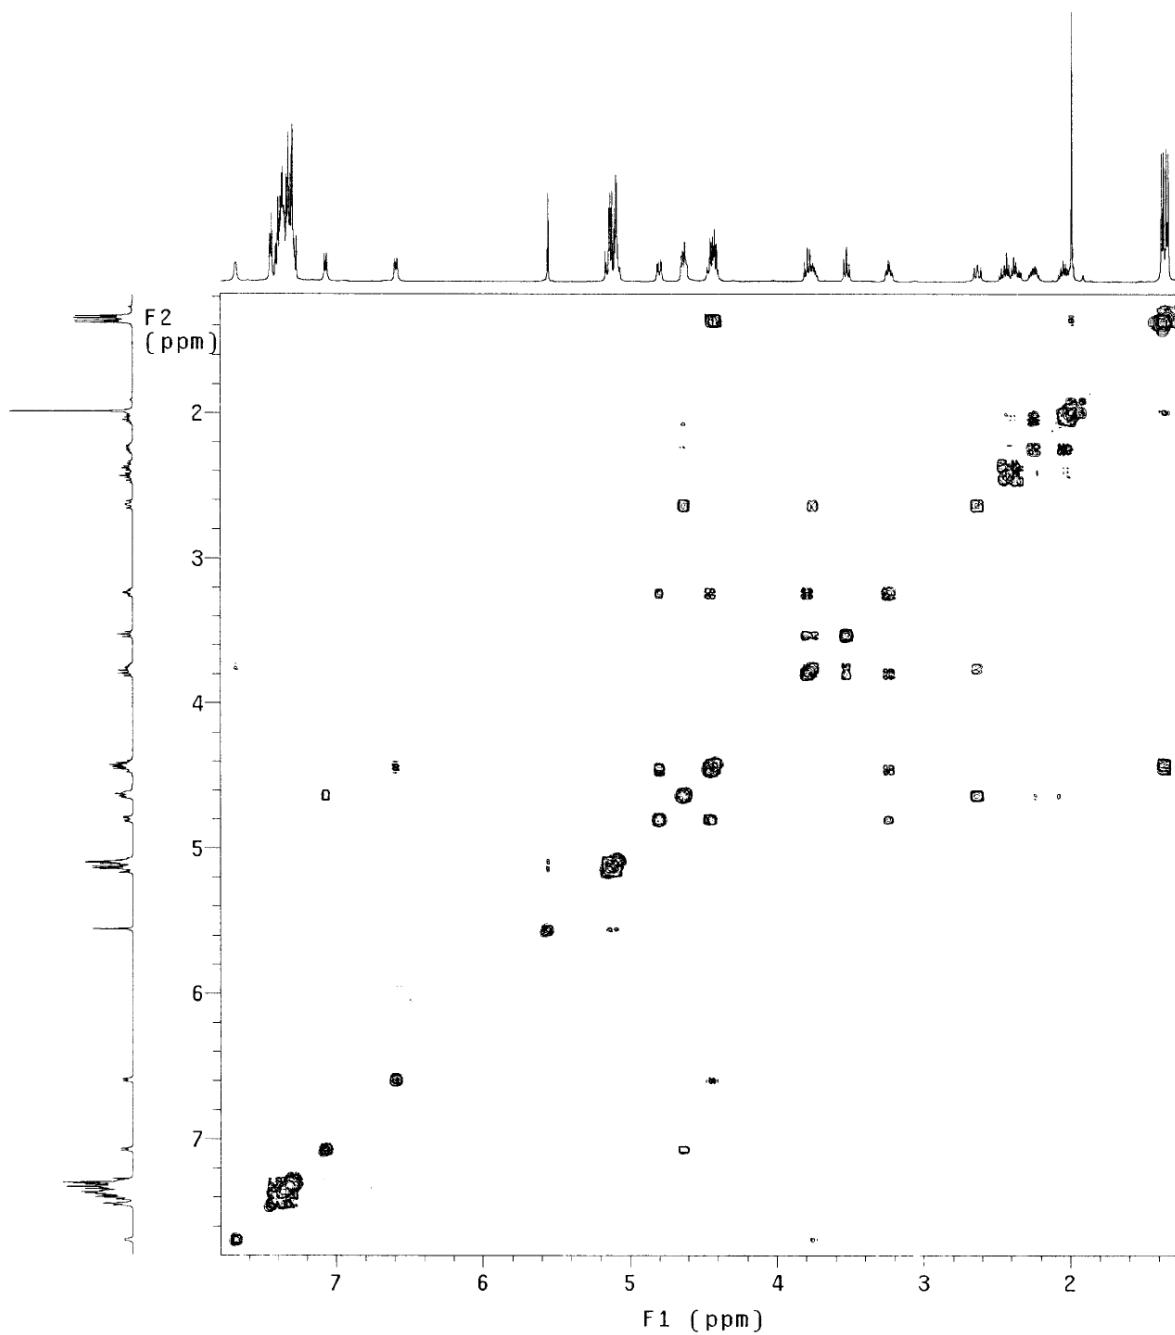

TY2-348

Pulse Sequence: hetcor

Solvent: CDCl3

Ambient temperature

User: 1-14-87

INOVA-500 "nmr2a.chem.nd.edu"

Relax. delay 1.500 sec

Acq. time 0.111 sec

Width 18403.5 Hz

2D Width 6533.3 Hz

32 repetitions

256 increments

OBSERVE C13, 125.6901698 MHz

DECOUPLE H1, 499.8639312 MHz

Power 40 dB

on during acquisition

off during delay

WALTZ-16 modulated

DATA PROCESSING

Line broadening 1.0 Hz

F1 DATA PROCESSING

Line broadening 0.3 Hz

FT size 4096 x 1024

Total time 3 hr, 46 min, 5 sec

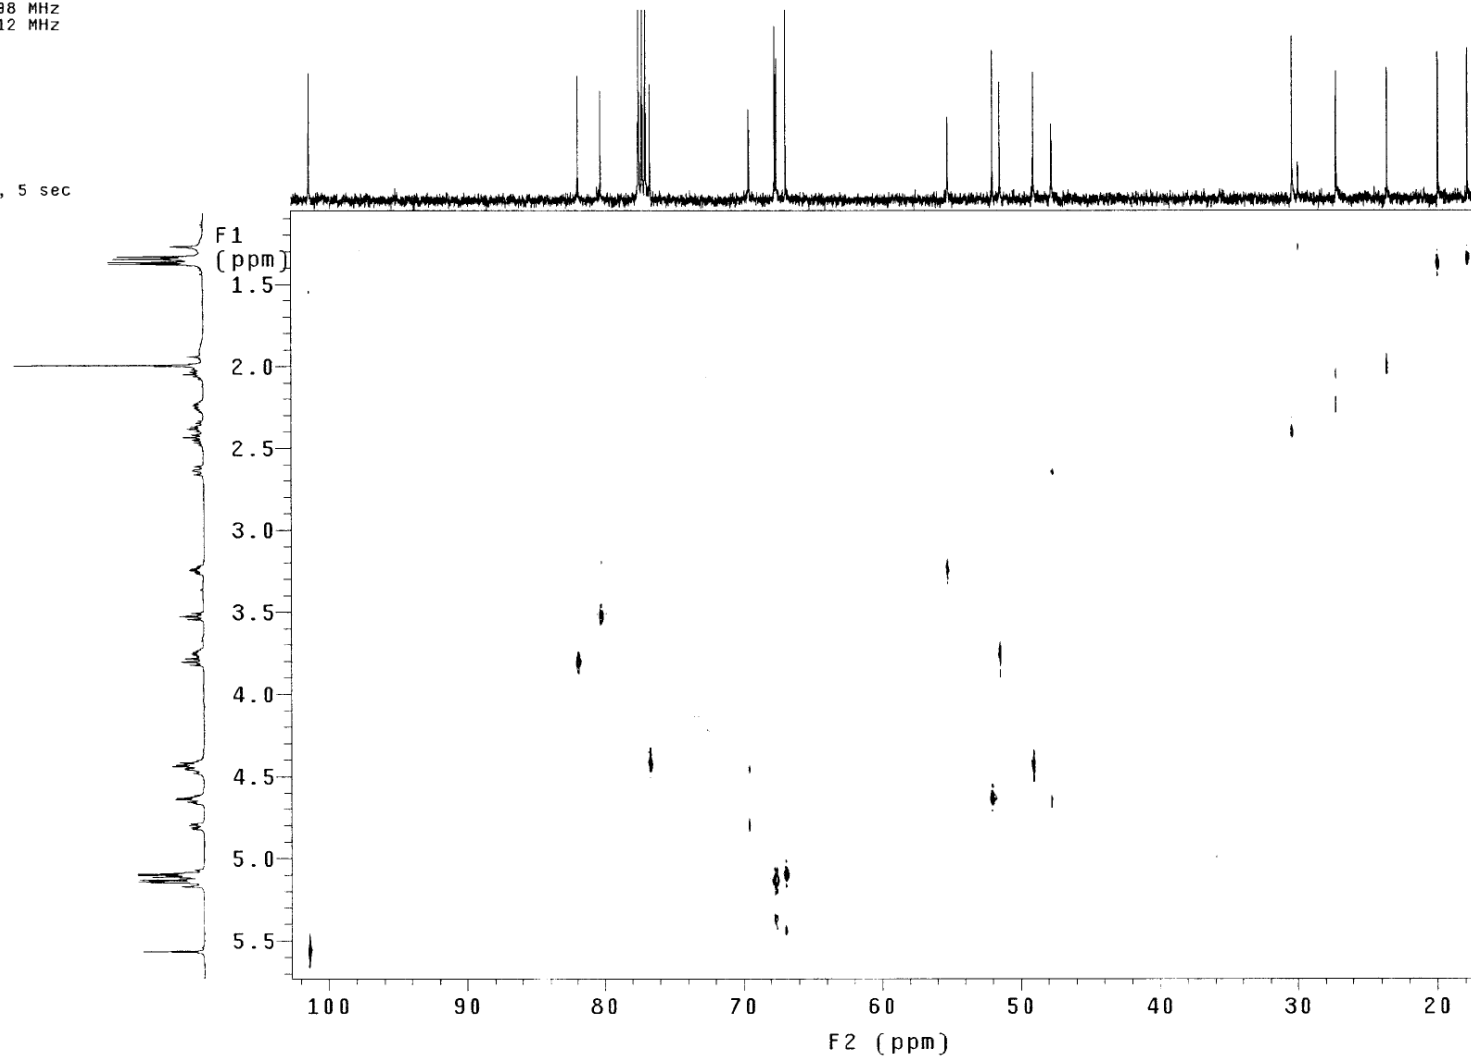

CH3 carbons

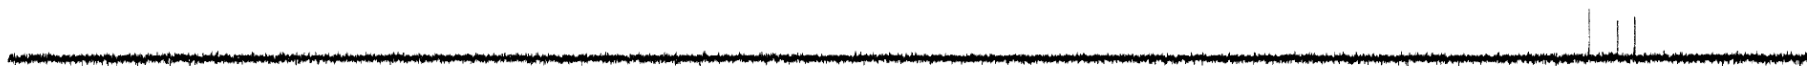

CH2 carbons

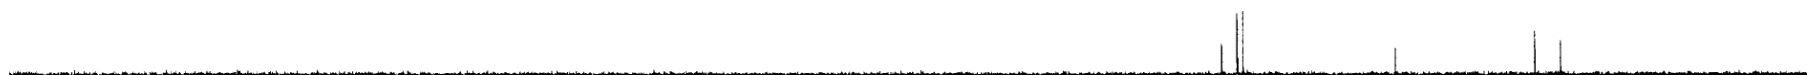

CH carbons

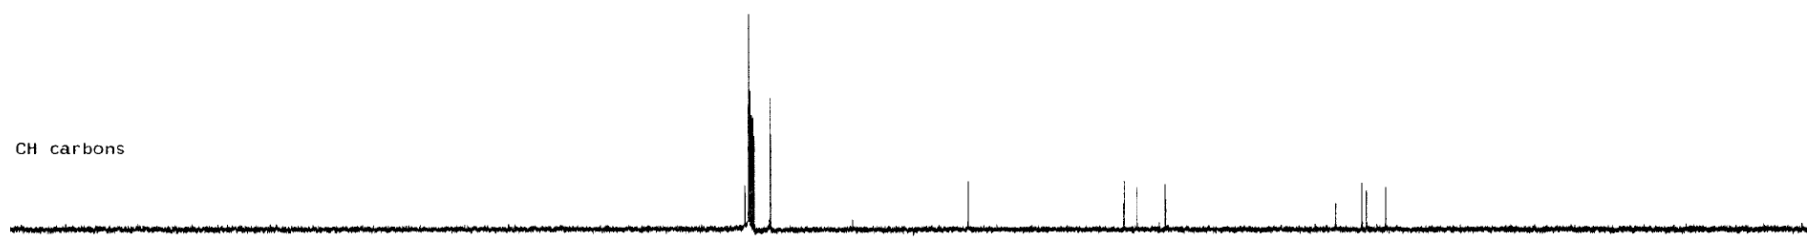

all protonated carbons

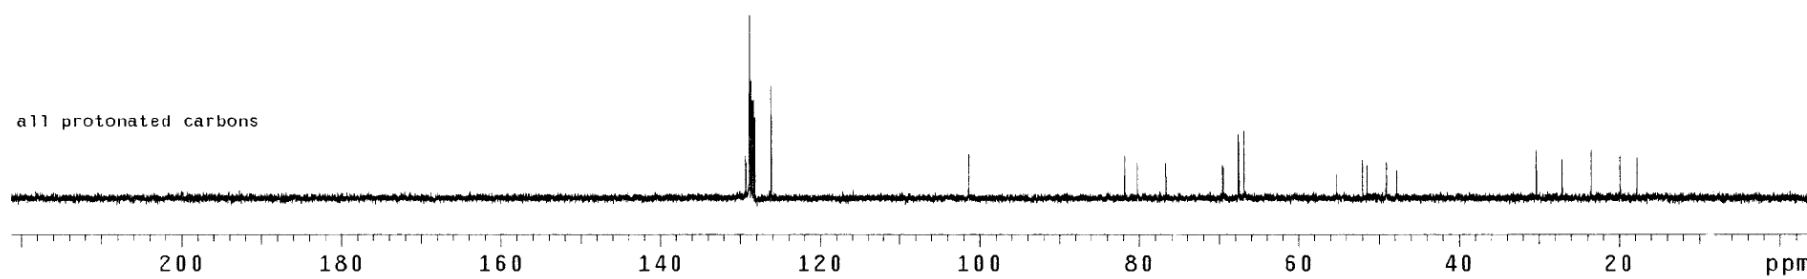

STANDARD PROTON PARAMETERS

exp1 s2pu1

|             |            |            |            |
|-------------|------------|------------|------------|
|             | SAMPLE     | DEC. & VT  |            |
| date        | Jun 1 2009 | dfrq       | 499.865    |
| solvent     | D2O        | dn         | H1         |
| file        | exp        | dpwr       | 30         |
| ACQUISITION |            | dof        | 0          |
| sfrq        | 499.865    | dm         | nm         |
| tn          | H1         | dmm        | c          |
| at          | 5.016      | dmf        | 200        |
| np          | 65536      | dseq       |            |
| sw          | 6533.3     | dres       | 1.0        |
| fb          | 4000       | homo       | n          |
| bs          | 4          | DEC2       |            |
| tpwr        | 61         | dfrq2      | 0          |
| pw          | 13.5       | dn2        |            |
| d1          | 0.100      | dpwr2      | 1          |
| tof         | 269.9      | dof2       | 0          |
| nt          | 32         | dm2        | n          |
| ct          | 32         | dmm2       | c          |
| alock       |            | dmf2       | 200        |
| gain        | not used   | dseq2      |            |
| FLAGS       |            | dres2      | 1.0        |
| il          | n          | homo2      | n          |
| in          | n          | DEC3       |            |
| dp          | y          | dfrq3      | 0          |
| hs          | nn         | dn3        |            |
| DISPLAY     |            | dpwr3      | 1          |
| sp          | -101.7     | dof3       | 0          |
| wp          | 5099.3     | dm3        | n          |
| vs          | 73         | dmm3       | c          |
| sc          | 0          | dmf3       | 200        |
| wc          | 250        | dseq3      |            |
| hzmm        | 20.40      | dres3      | 1.0        |
| is          | 176.85     | homo3      | n          |
| rfl         | 2836.0     | PROCESSING |            |
| rfp         | 2399.3     | wfile      | ft         |
| th          | 7          | proc       |            |
| ins         | 6.000      | fn         | 65536      |
| ai          | ph         | math       | f          |
|             |            | werr       |            |
|             |            | wexp       | process pH |
|             |            | wbs        |            |
|             |            | wnt        | wft        |

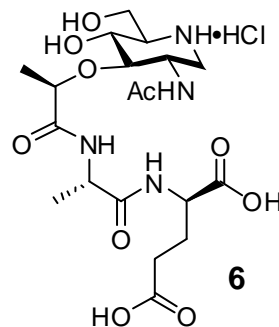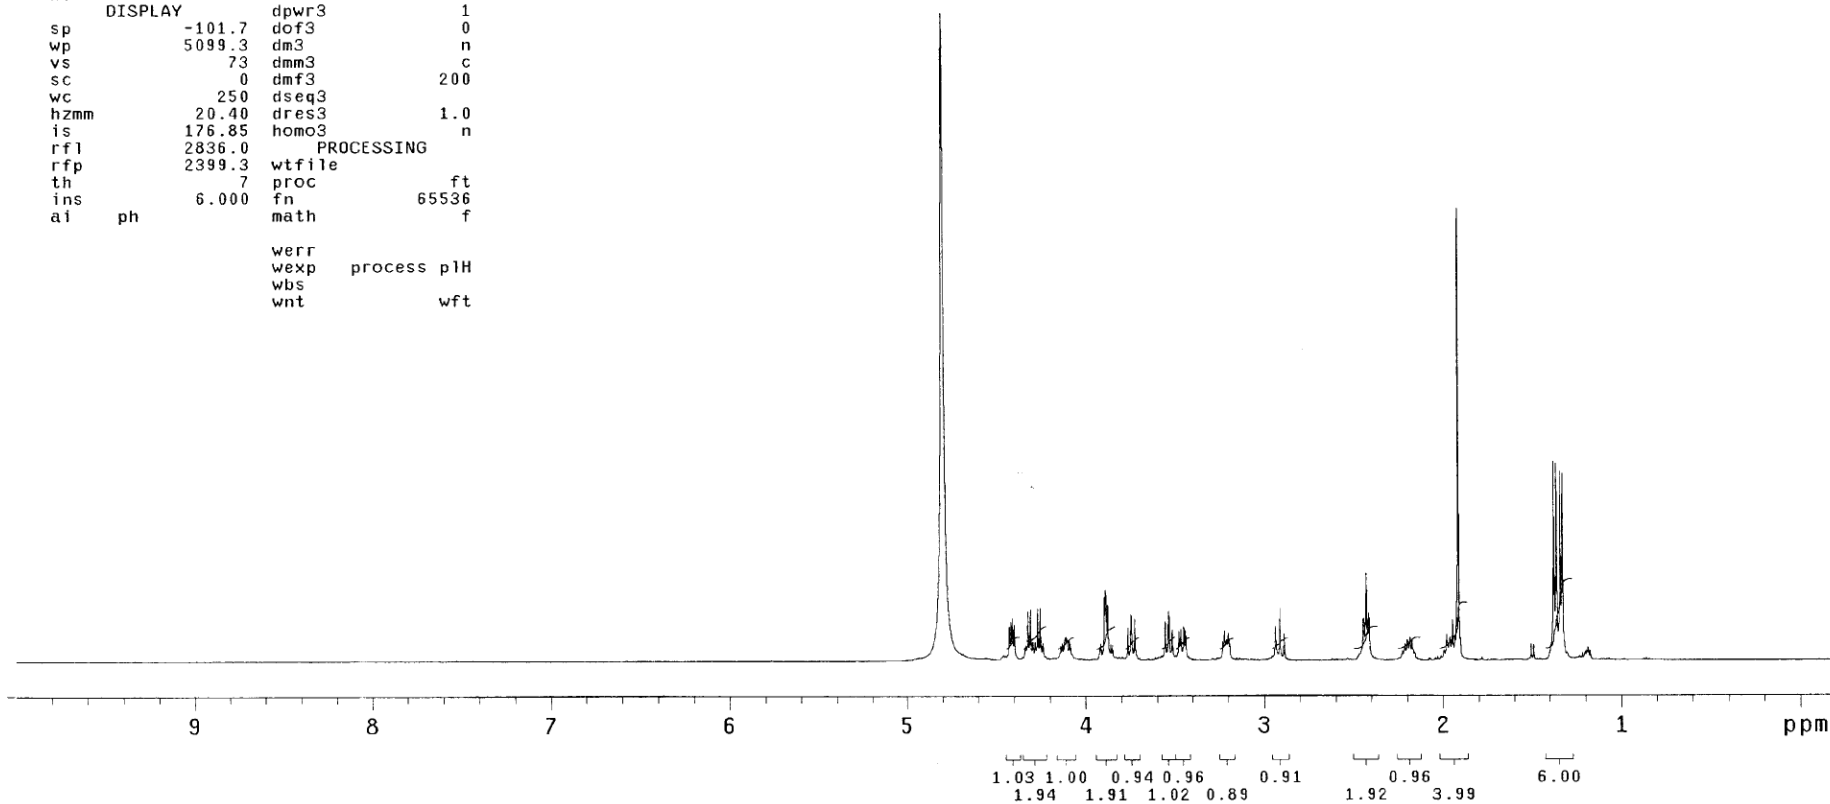

TY2-358

exp2 s2pu1

```
SAMPLE          DEC. & VT
date May 29 2009 dfrq          499.865
solvent D2O dn                H1
file exp dpwr                40
ACQUISITION dof              0
sfrq 125.703 dm              yyy
tn C13 dmm                  w
at 1.215 dmf                8787.35
np 65536 dseq
sw 26963.3 dres              1.0
fb 15000 homo                n
bs 4 DEC2
tpwr 52 dfrq2              0
pw 10.2 dn2
d1 1.800 dpwr2              1
tof 144.5 dof2              0
nt 3000 dm2                 n
ct 392 dmm2                 c
alock n dmf2                10000
gain not used dseq2
FLAGS n dres2              1.0
in n homo2                  n
in n DEC3
dp y dfrq3                  0
hs nn dn3
DISPLAY dpwr3              1
sp -1394.6 dof3              0
wp 26962.9 dm3               n
vs 361 dmm3                 c
sc 0 dmf3                    10000
wc 250 dseq3                 1.0
hzmm 107.85 dres3            1.0
is 500.00 homo3             n
rfl 1395.0 PROCESSING
rfp 0 lb                      1.00
th 5 wtfile
ins 100.000 proc             ft
ai cdc ph fn                  131072
math f

werr
wexp
wbs
wnt
```

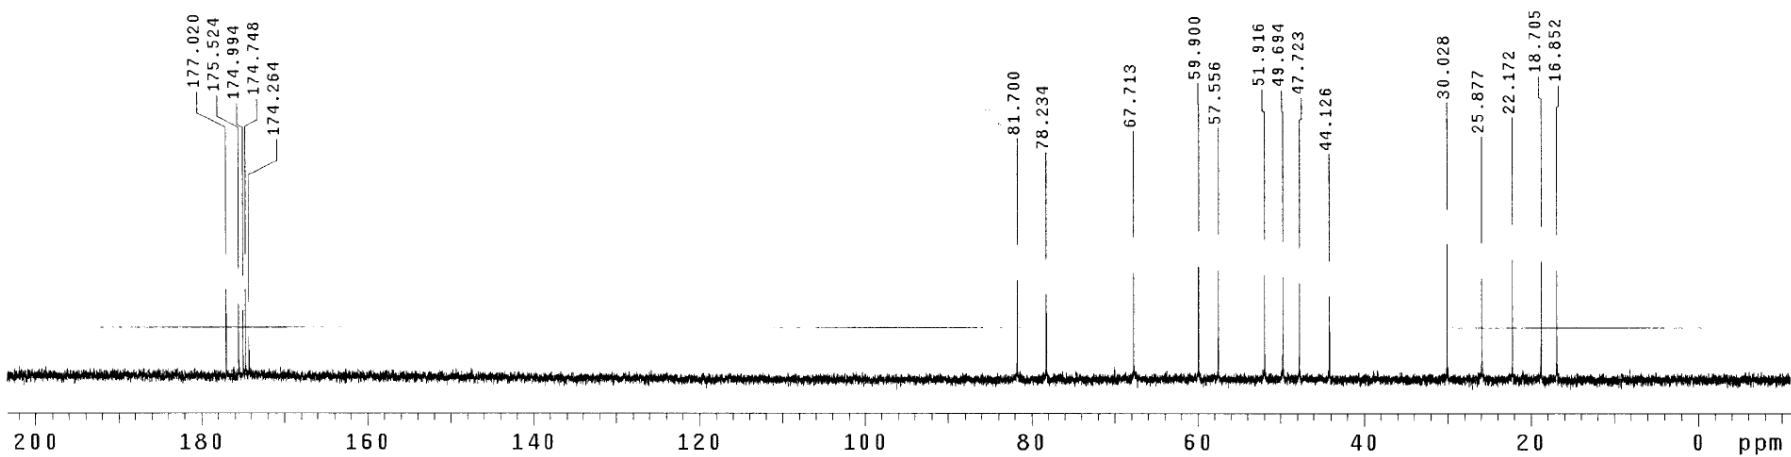



TY2-358

Pulse Sequence: relayh

Solvent: D2O  
Ambient temperature  
INOVA-500 "nmr2a.chem.nd.edu"

Relax. delay 1.300 sec  
COSY 90-90  
Acq. time 0.157 sec  
Width 6533.3 Hz  
2D Width 6533.3 Hz  
32 repetitions  
256 increments  
OBSERVE H1, 499.8623875 MHz  
DATA PROCESSING  
Sine bell 0.078 sec  
F1 DATA PROCESSING  
Sine bell 0.039 sec  
FT size 2048 x 2048  
Total time 3 hr, 23 min, 10 sec

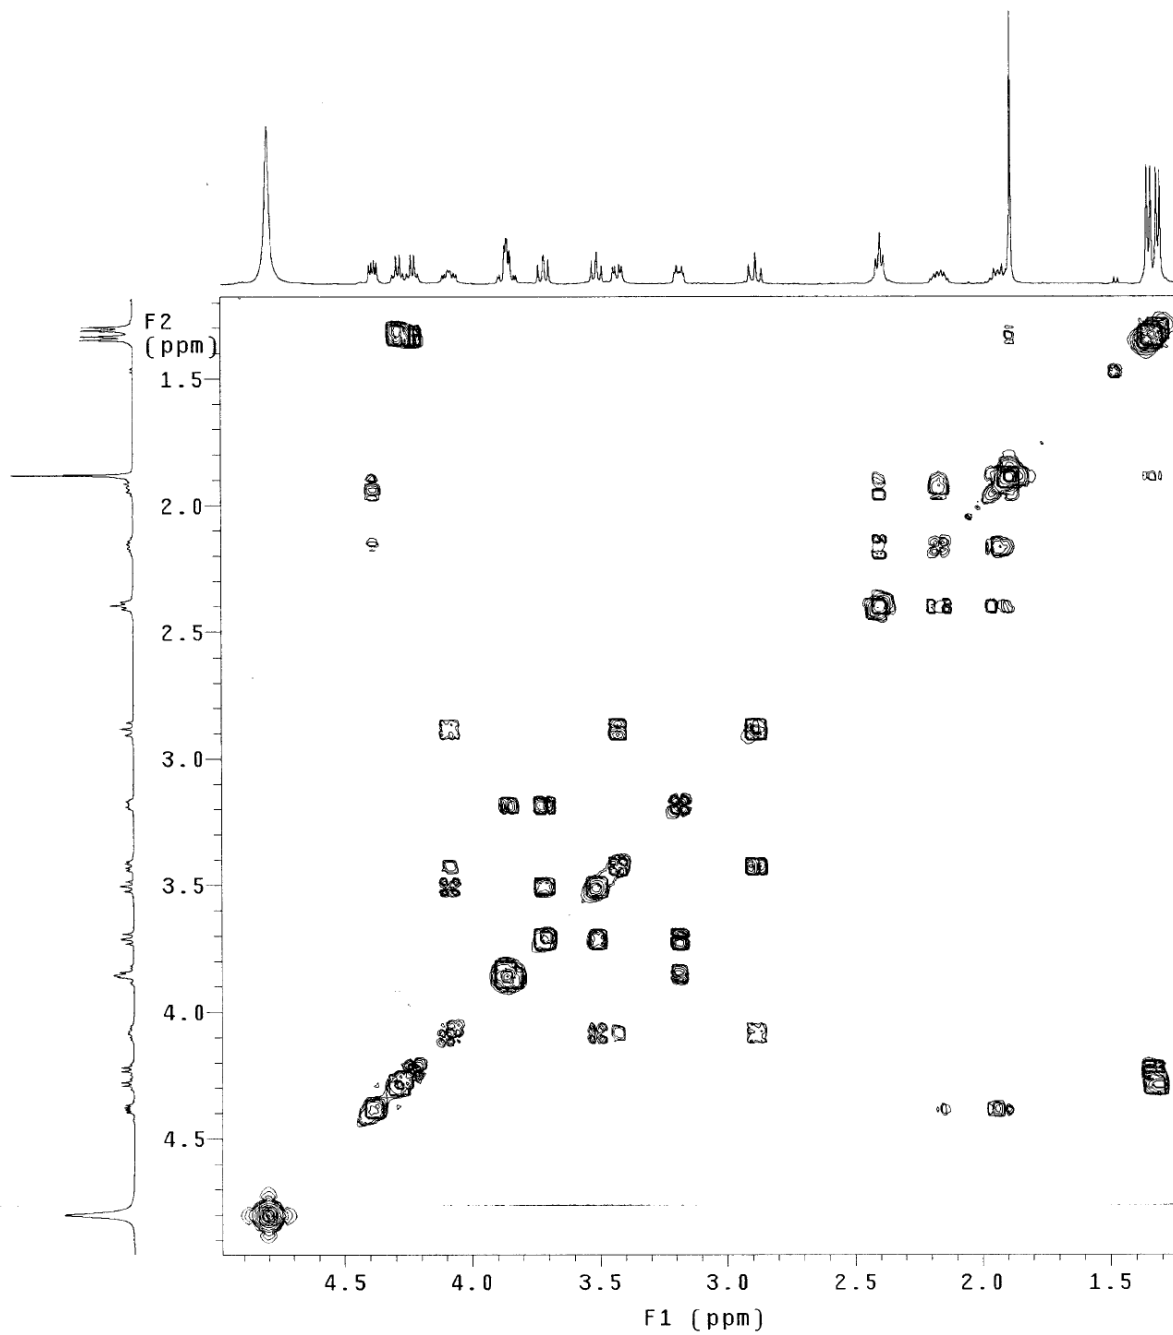

TY2-358

Pulse Sequence: hetcor

Solvent: D2O

Ambient temperature

User: 1-14-87

INOVA-500 "nmr2a.chem.nd.edu"

Relax. delay 1.500 sec

Acq. time 0.111 sec

Width 18403.5 Hz

2D Width 6533.3 Hz

32 repetitions

256 increments

OBSERVE C13, 125.6904822 MHz

DECOUPLE H1, 499.8652159 MHz

Power 40 dB

on during acquisition

off during delay

WALTZ-16 modulated

DATA PROCESSING

Line broadening 1.0 Hz

F1 DATA PROCESSING

Line broadening 0.3 Hz

FT size 4096 x 1024

Total time 3 hr, 46 min, 5 sec

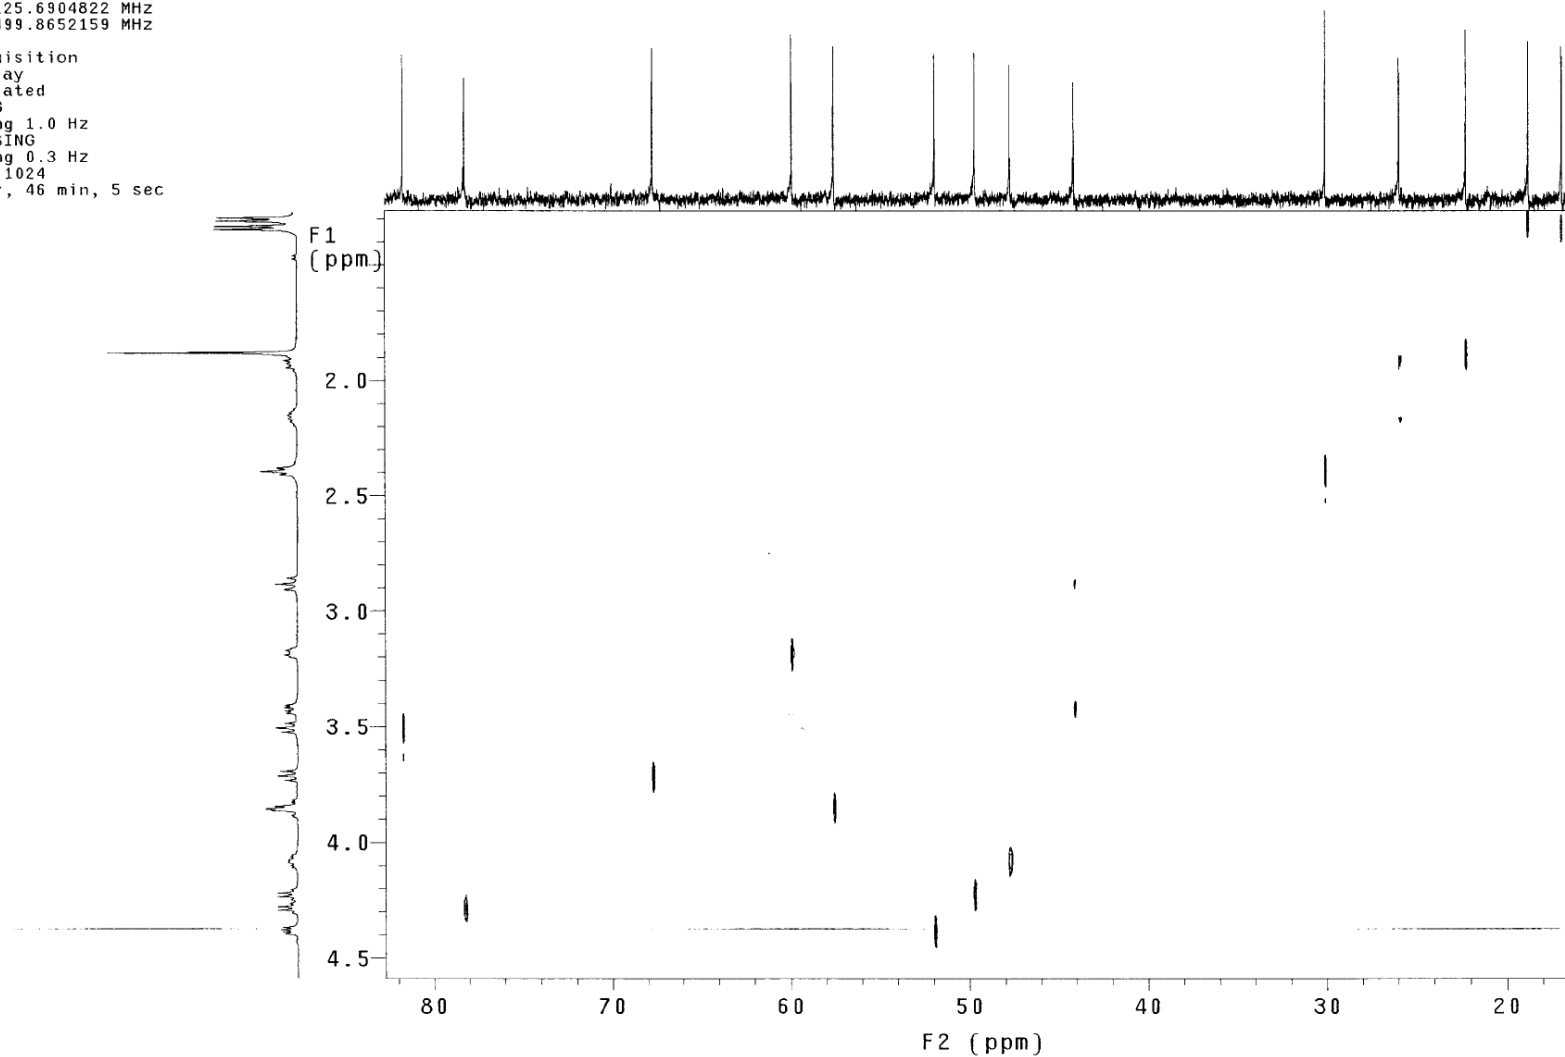

CH3 carbons

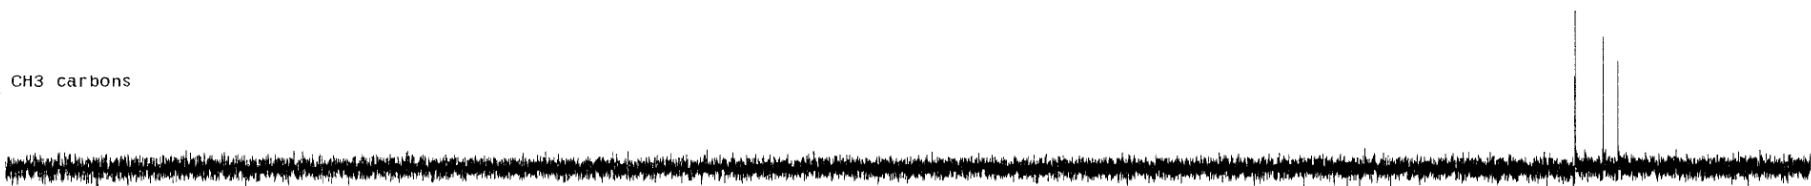

CH2 carbons

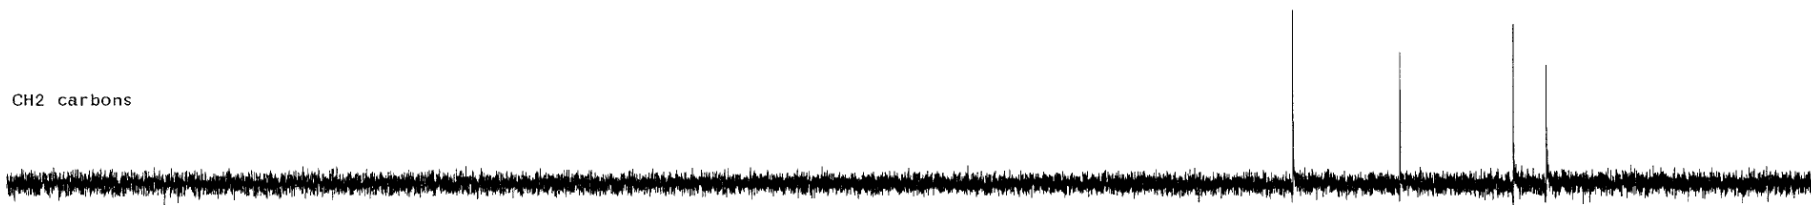

CH carbons

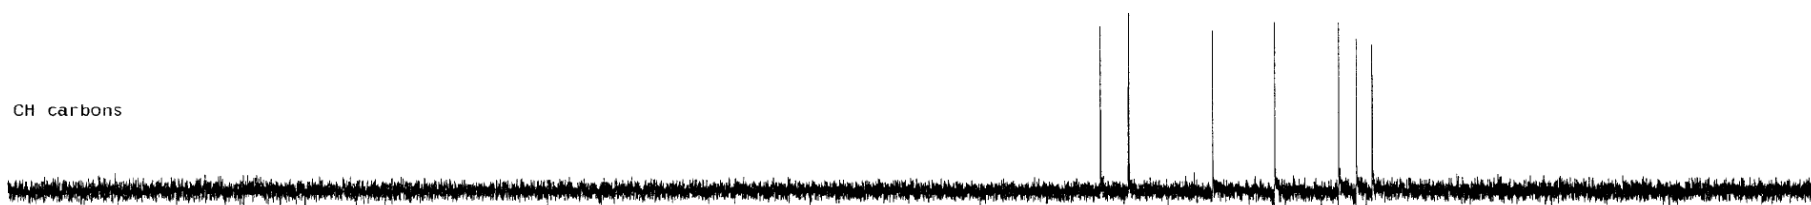

all protonated carbons

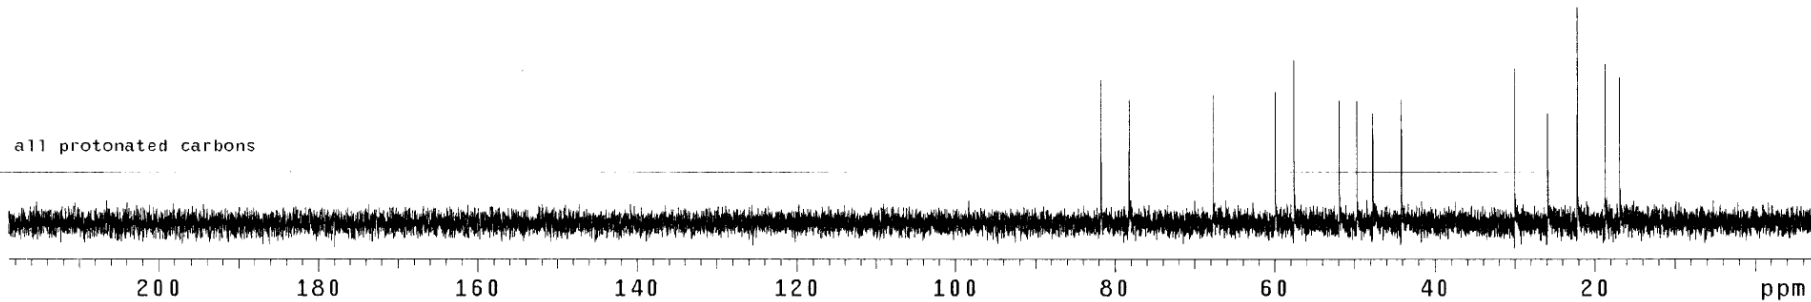

200 180 160 140 120 100 80 60 40 20 ppm

TY2-430

exp2 s2pu1

SAMPLE DEC. & VT  
date Aug 17 2009 dfrq 499.864  
solvent CDC13 dn H1  
file exp dpwr 30  
ACQUISITION dof 0  
sfrq 499.864 dm nnn  
tn H1 dmm c  
at 5.016 dmf 200  
np 65536 dseq  
sw 6533.3 dres 1.0  
fb 4000 homo n  
bs 4 DEC2  
tpwr 61 dfrq2 0  
pw 13.5 dn2  
d1 0.100 dpwr2 1  
tof 269.9 dof2 0  
nt 32 dm2 n  
ct 32 dmm2 c  
alock n dmf2 200  
gain not used dseq2  
FLAGS dres2 1.0  
il n homo2 n  
in n DEC3  
dp y dfrq3 0  
hs nn dn3  
DISPLAY dpwr3 1  
sp -102.6 dof3 0  
wp 5099.3 dm3 n  
vs 29 dmm3 c  
sc 0 dmf3 200  
wc 250 dseq3  
hzmm 20.40 dres3 1.0  
is 45.41 homo3 n  
rfl 4140.1 PROCESSING  
rfp 3634.0 wtfile  
th 7 proc ft  
ins 3.000 fn 65536  
ai ph math f  
werr  
wexp process pH  
wbs  
wnt wft

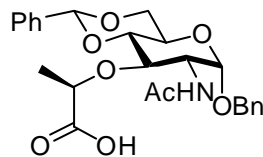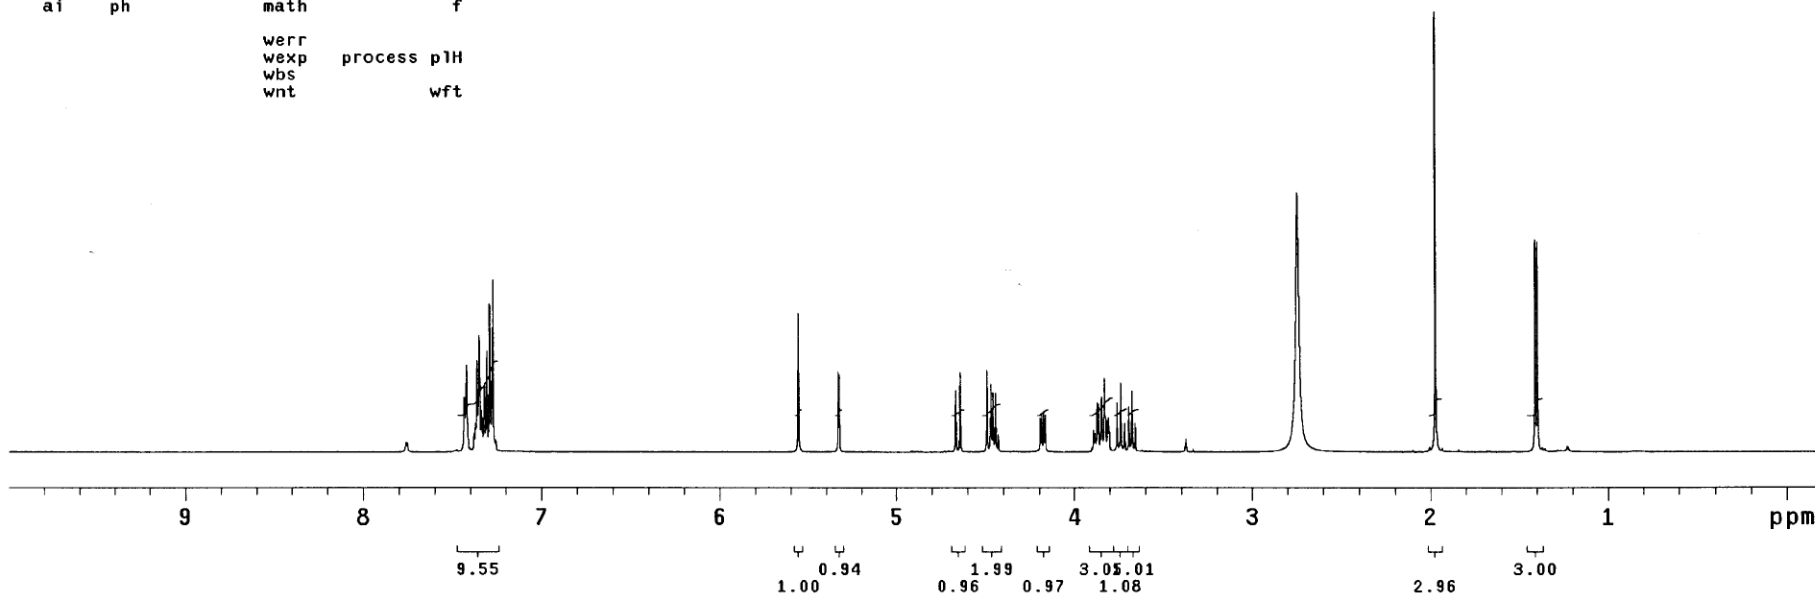

TY2-430

exp3 s2pu1

```
SAMPLE          DEC. & VT
date Aug 17 2009 dfrq      499.864
solvent CDC13    dn        H1
file exp        dpwr      40
ACQUISITION     dof       0
sfrq 125.702    dm        yy
tn C13          dmm       w
at 1.215        dmf       8787.35
np 65536        dseq
sw 26963.3      dres      1.0
fb 15000        homo      n
bs 4            DEC2
tpwr 52         dfrq2     0
pw 10.2         dn2
d1 1.800        dpwr2     1
tof 144.5       dof2      0
nt 3000        dm2       n
ct 316         dmm2      c
alock not used  dmf2     10000
gain          dseq2
FLAGS         dres2     1.0
il n           homo2     n
in n           DEC3
dp y          dfrq3     0
hs nn        dn3
DISPLAY       dpwr3     1
sp -1405.6     dof3      0
wp 26962.9    dm3       n
vs 422        dmm3      c
sc 0          dmf3     10000
wc 250        dseq3
hzmm 107.85   dres3     1.0
is 500.00    homo3     n
rfl 11113.0  PROCESSING
rfp 9707.1   lb        1.00
th 4         wtfile
ins 100.000  proc      ft
ai cdc ph   fn      131072
            math     f
            werr
            wexp
            wbs
            wnt
```

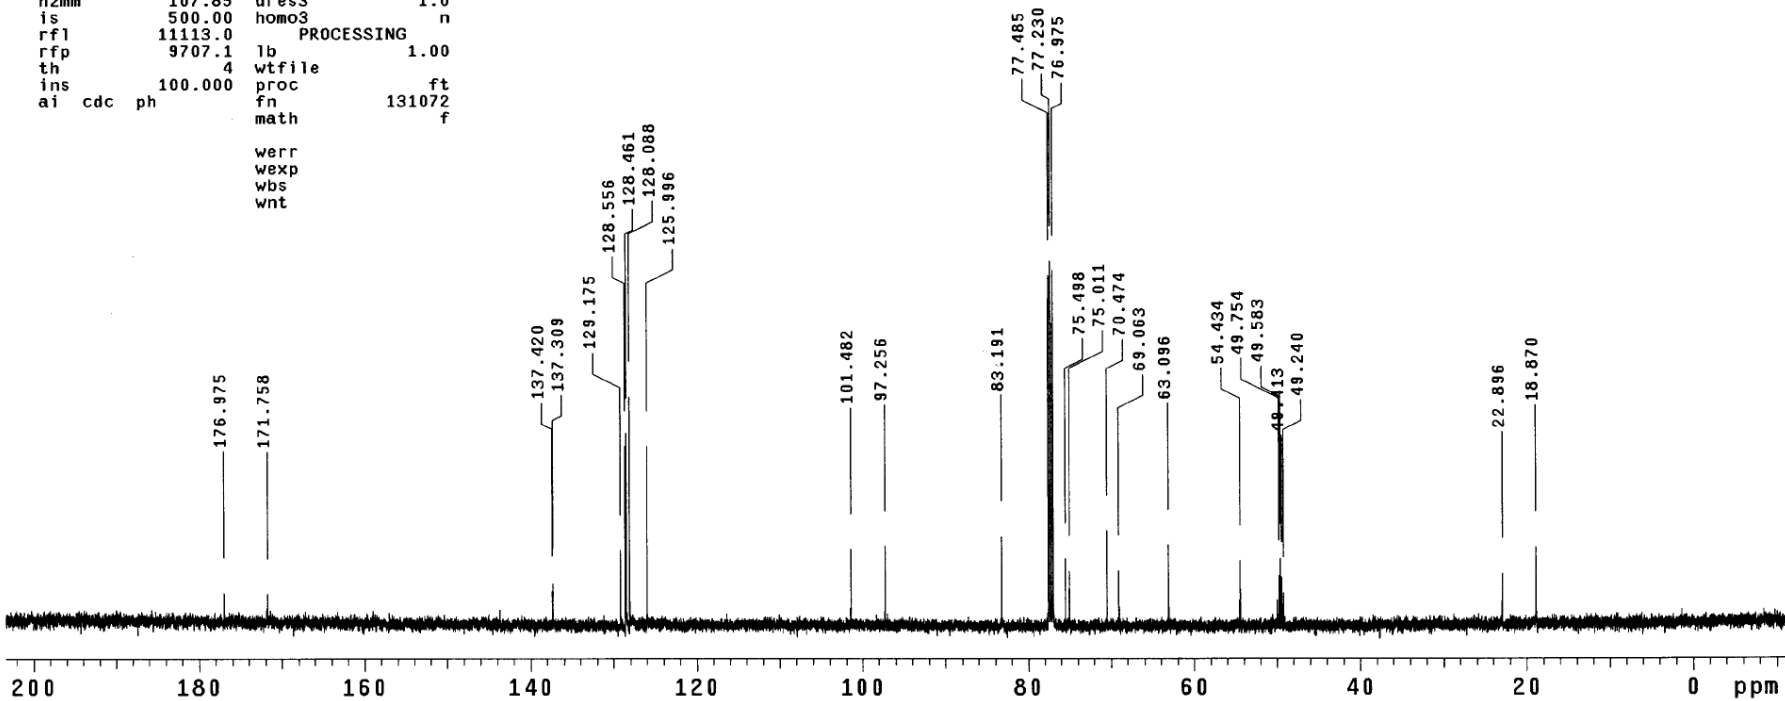

TY2-430

Pulse Sequence: relayh

Solvent: CDC13  
Ambient temperature  
INNOVA-500 "nmr2a.chem.nd.edu"

Relax. delay 1.300 sec  
COSY 90-90  
Acq. time 0.157 sec  
Width 6533.3 Hz  
2D Width 6533.3 Hz  
32 repetitions  
256 increments  
OBSERVE H1, 499.8611707 MHz  
DATA PROCESSING  
Sine bell 0.078 sec  
F1 DATA PROCESSING  
Sine bell 0.039 sec  
FT size 2048 x 2048  
Total time 3 hr, 23 min, 10 sec

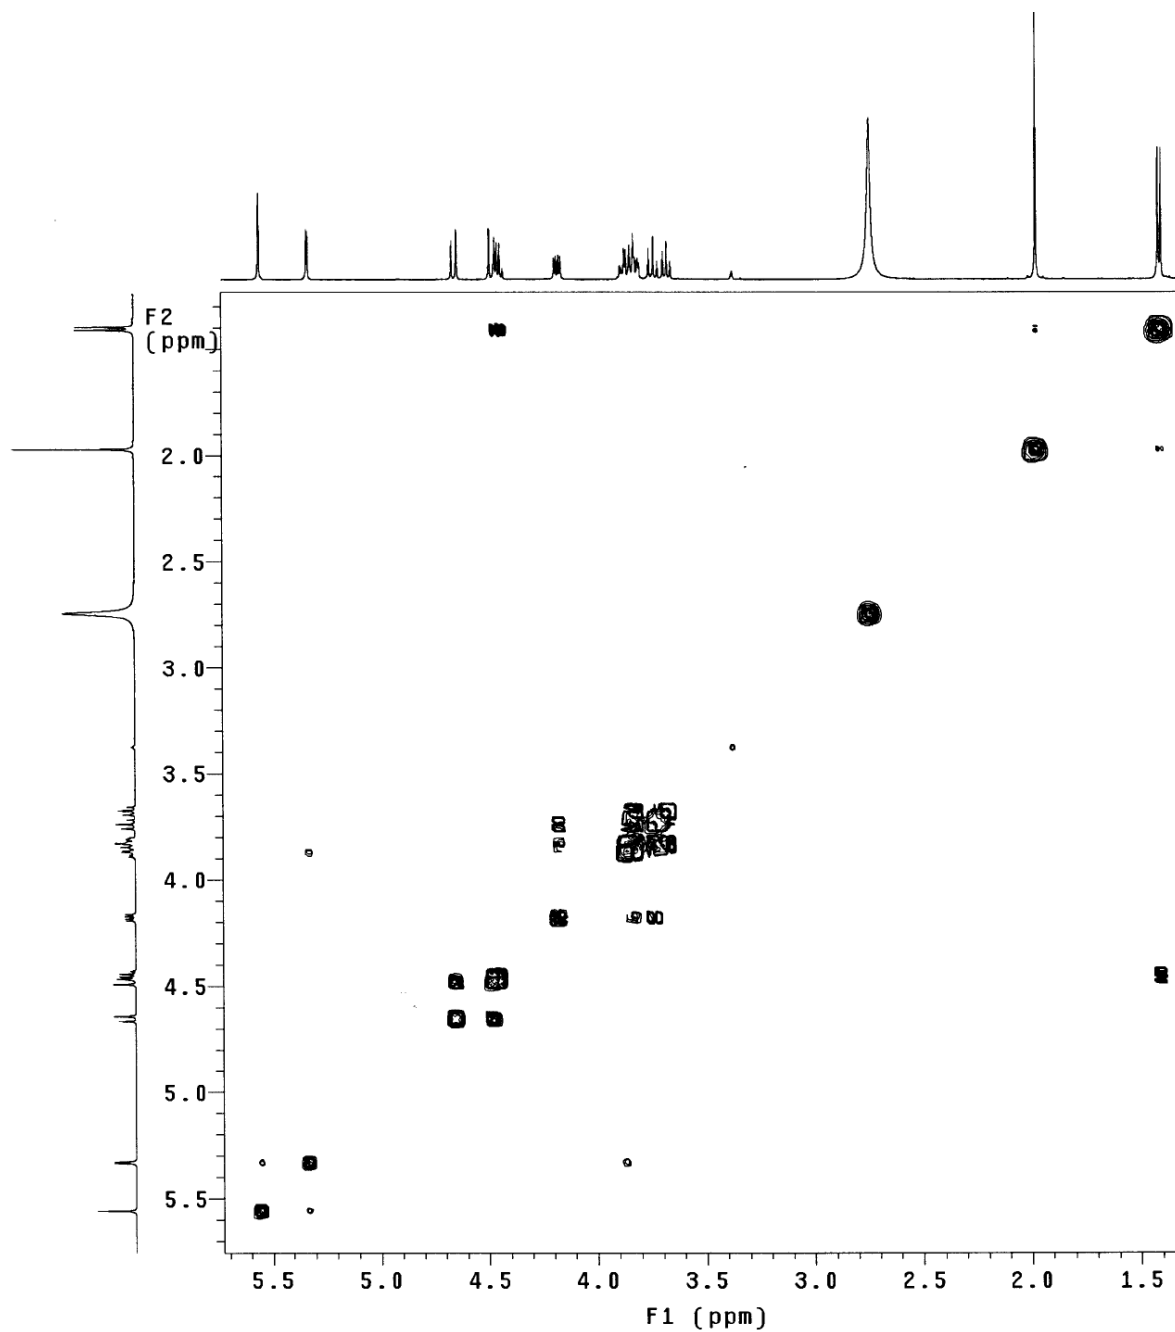

TY2-430

Pulse Sequence: hetcor

Solvent: CDC13

Ambient temperature

User: 1-14-87

INOVA-500 "nmr2a.chem.nd.edu"

Relax. delay 1.500 sec

Acq. time 0.111 sec

Width 18403.5 Hz

2D Width 6533.3 Hz

32 repetitions

256 increments

OBSERVE C13, 125.6901702 MHz

DECOUPLE H1, 499.8639312 MHz

Power 40 dB

on during acquisition

off during delay

WALTZ-16 modulated

DATA PROCESSING

Line broadening 1.0 Hz

F1 DATA PROCESSING

Line broadening 0.3 Hz

FT size 4096 x 1024

Total time 3 hr, 46 min, 5 sec

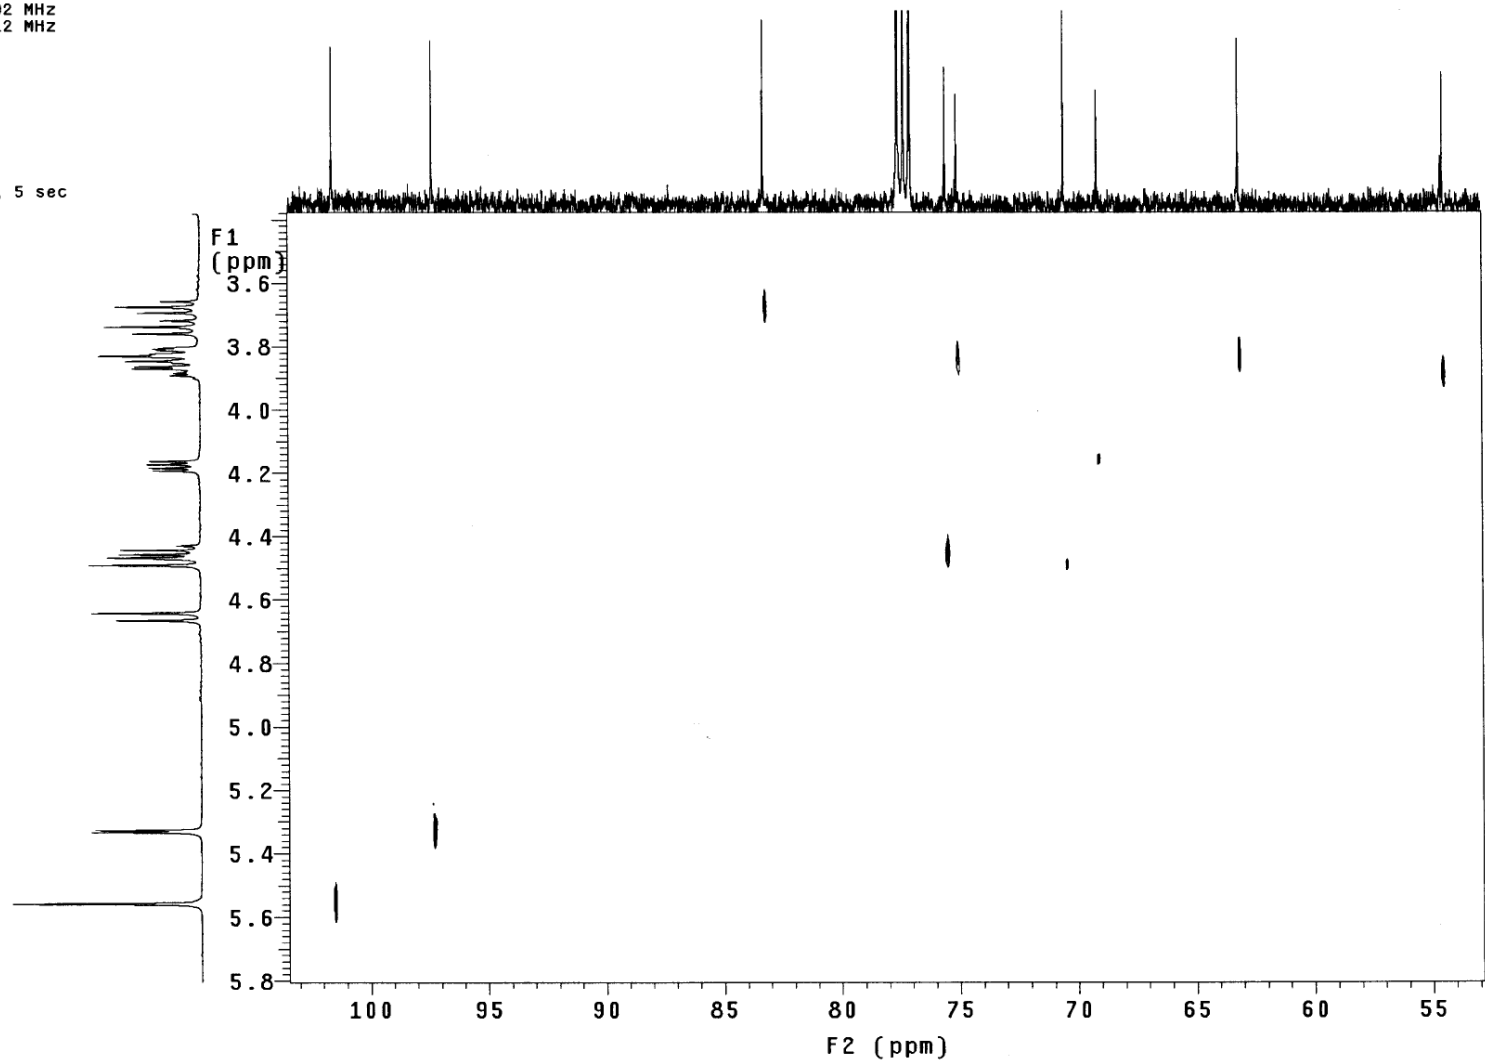

TY2-430

Pulse Sequence: hetcor

Solvent: CDC13

Ambient temperature

User: 1-14-87

INOVA-500 "nmr2a.chem.nd.edu"

Relax. delay 1.500 sec

Acq. time 0.111 sec

Width 18403.5 Hz

2D Width 6533.3 Hz

32 repetitions

256 increments

OBSERVE C13, 125.6901702 MHz

DECOUPLE H1, 499.8639312 MHz

Power 40 dB

on during acquisition

off during delay

WALTZ-16 modulated

DATA PROCESSING

Line broadening 1.0 Hz

F1 DATA PROCESSING

Line broadening 0.3 Hz

FT size 4096 x 1024

Total time 3 hr, 46 min, 5 sec

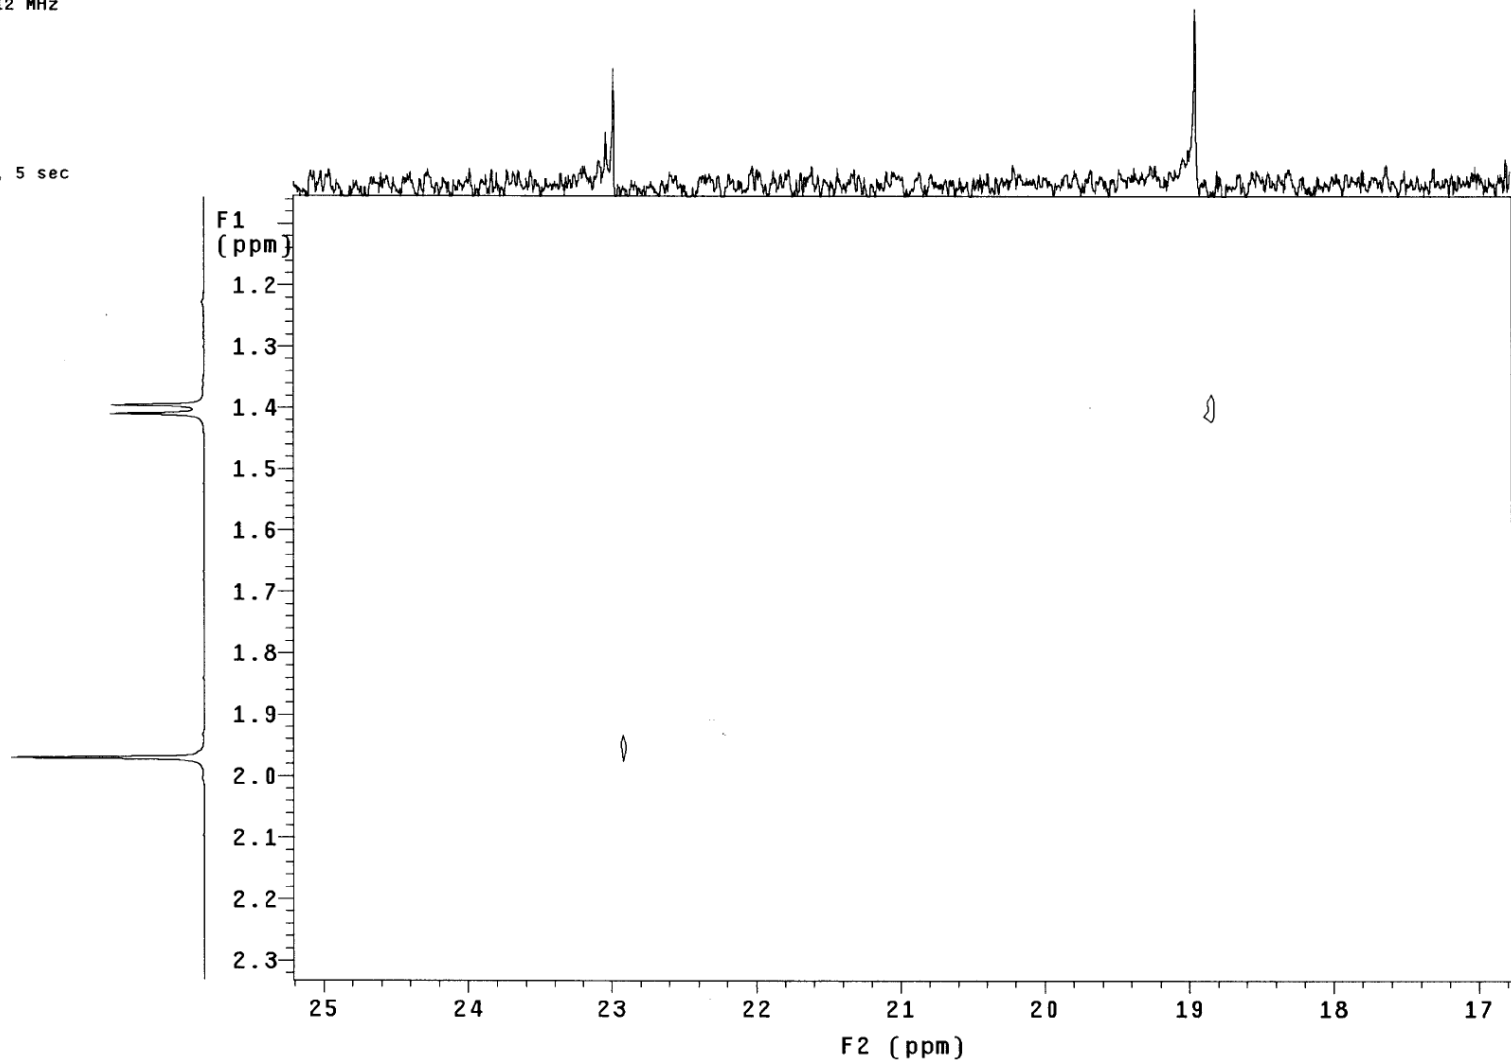



CH3 carbons

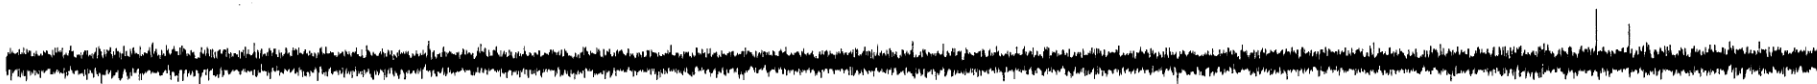

CH2 carbons

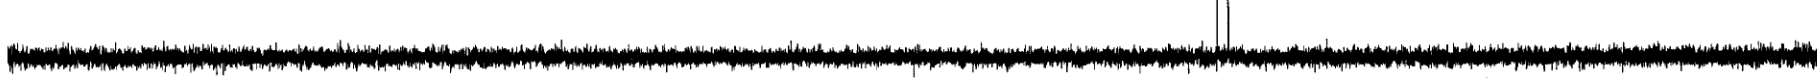

CH carbons

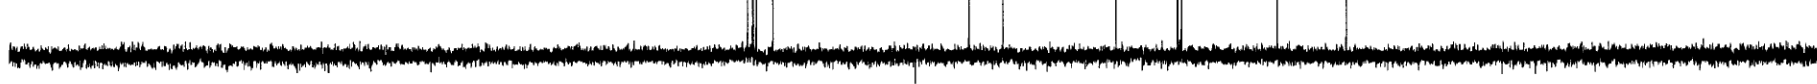

all protonated carbons

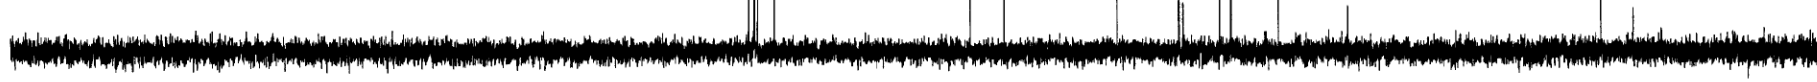

200 180 160 140 120 100 80 60 40 20 ppm
